# Supplementary material for: Pfh1 Is an Accessory Replicative Helicase that Interacts with the Replisome to Facilitate Fork Progression and Preserve Genome Integrity
Source: PubMed Central journal article supplement (PMC5017727; doi:10.1371/journal.pgen.1006238), 2016-09-09

# SPATRNAALA.01

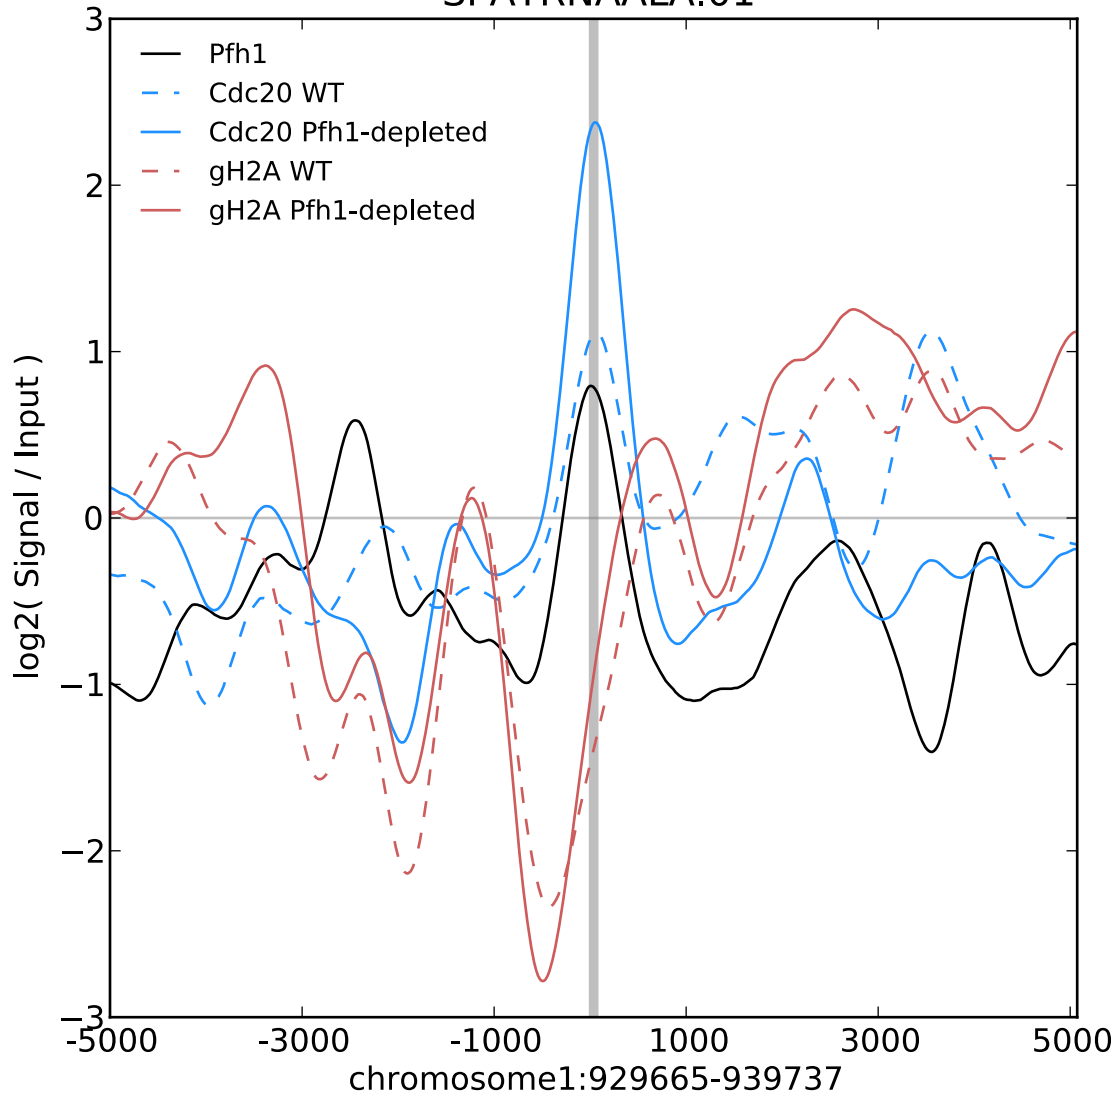

# SPATRNAALA.02

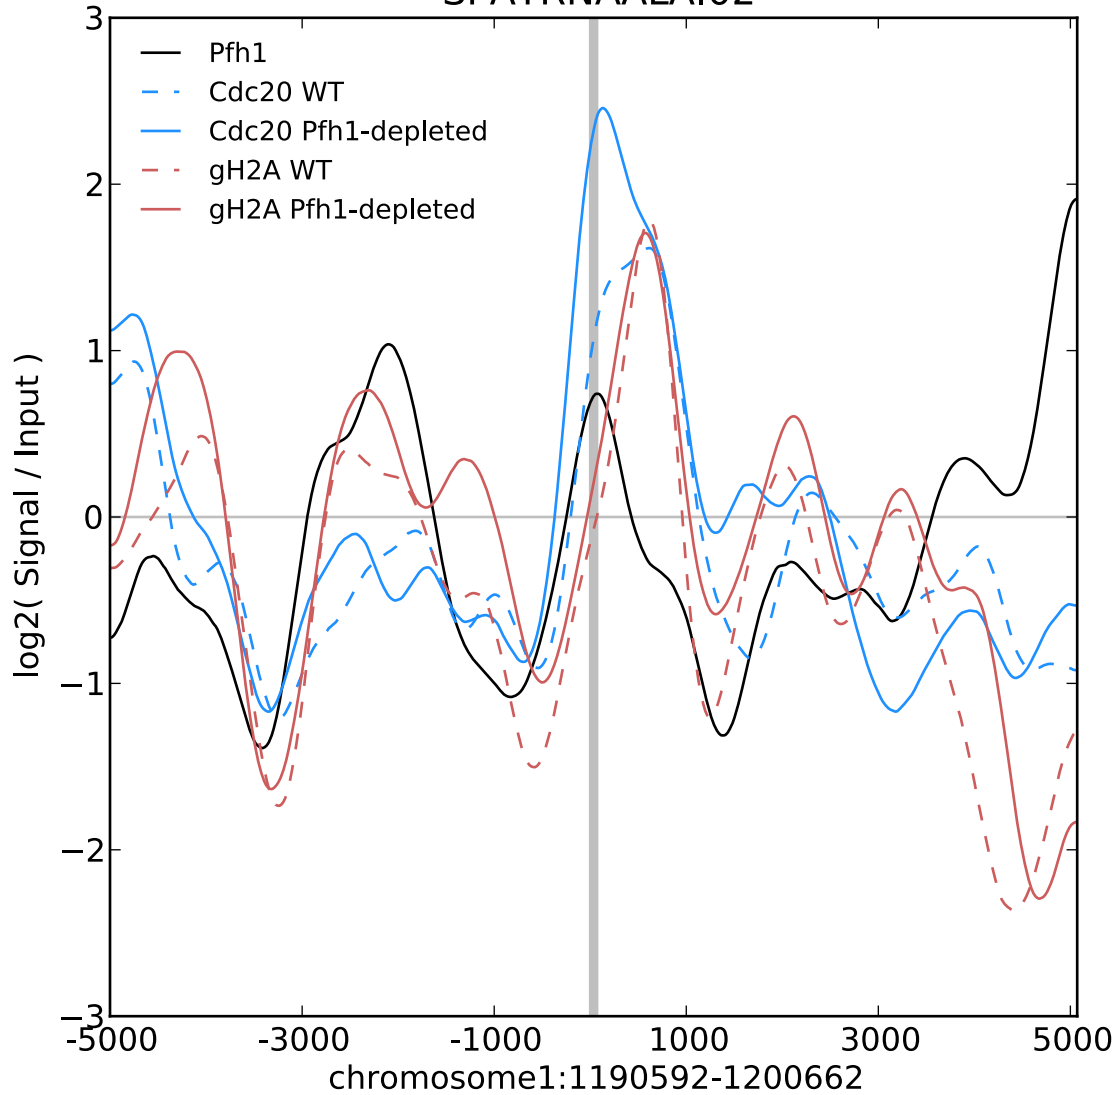

# SPATRNAALA.03

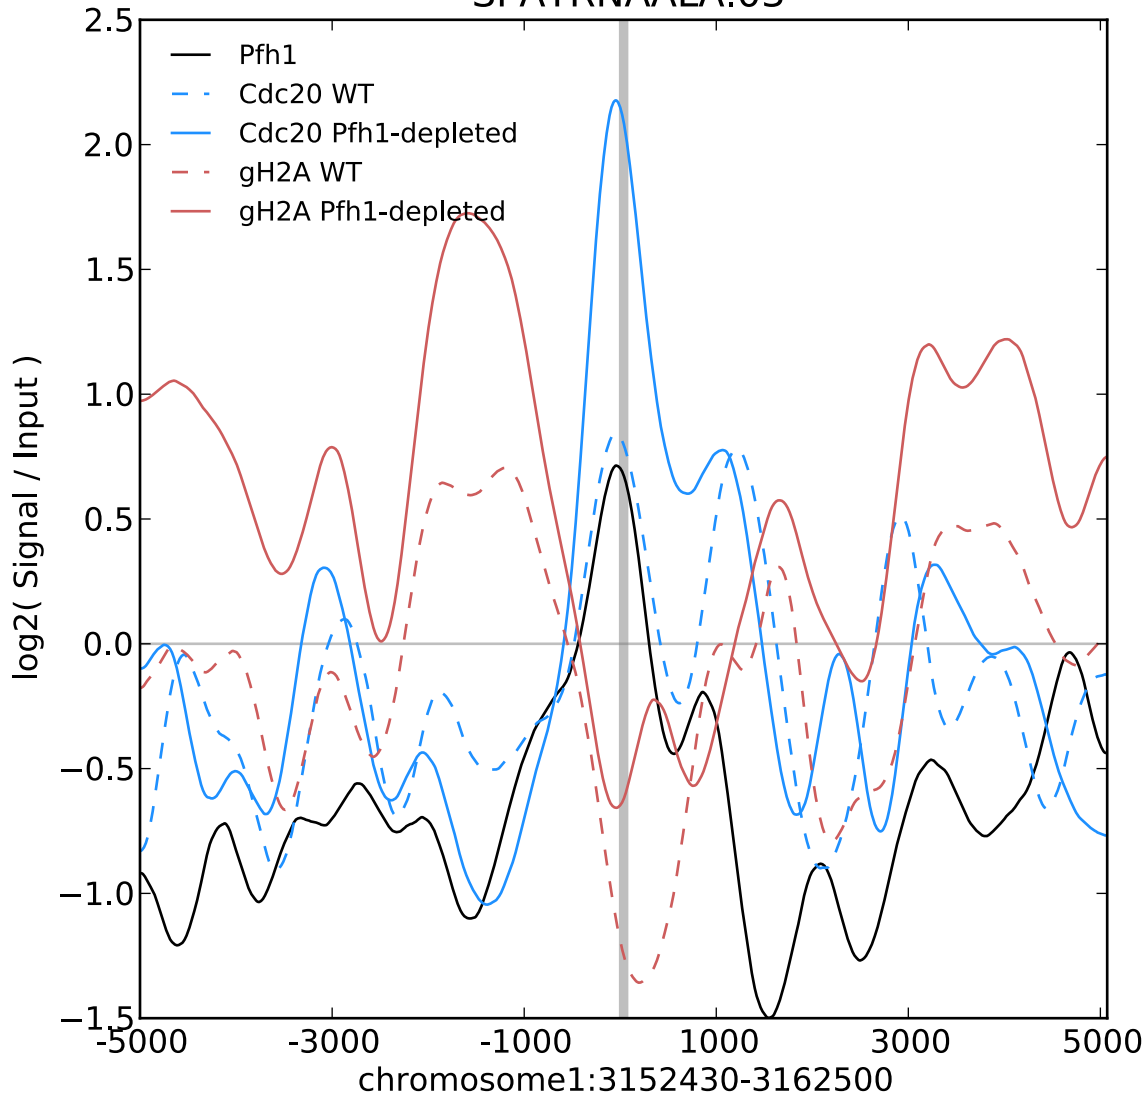

# SPATRNAALA.04

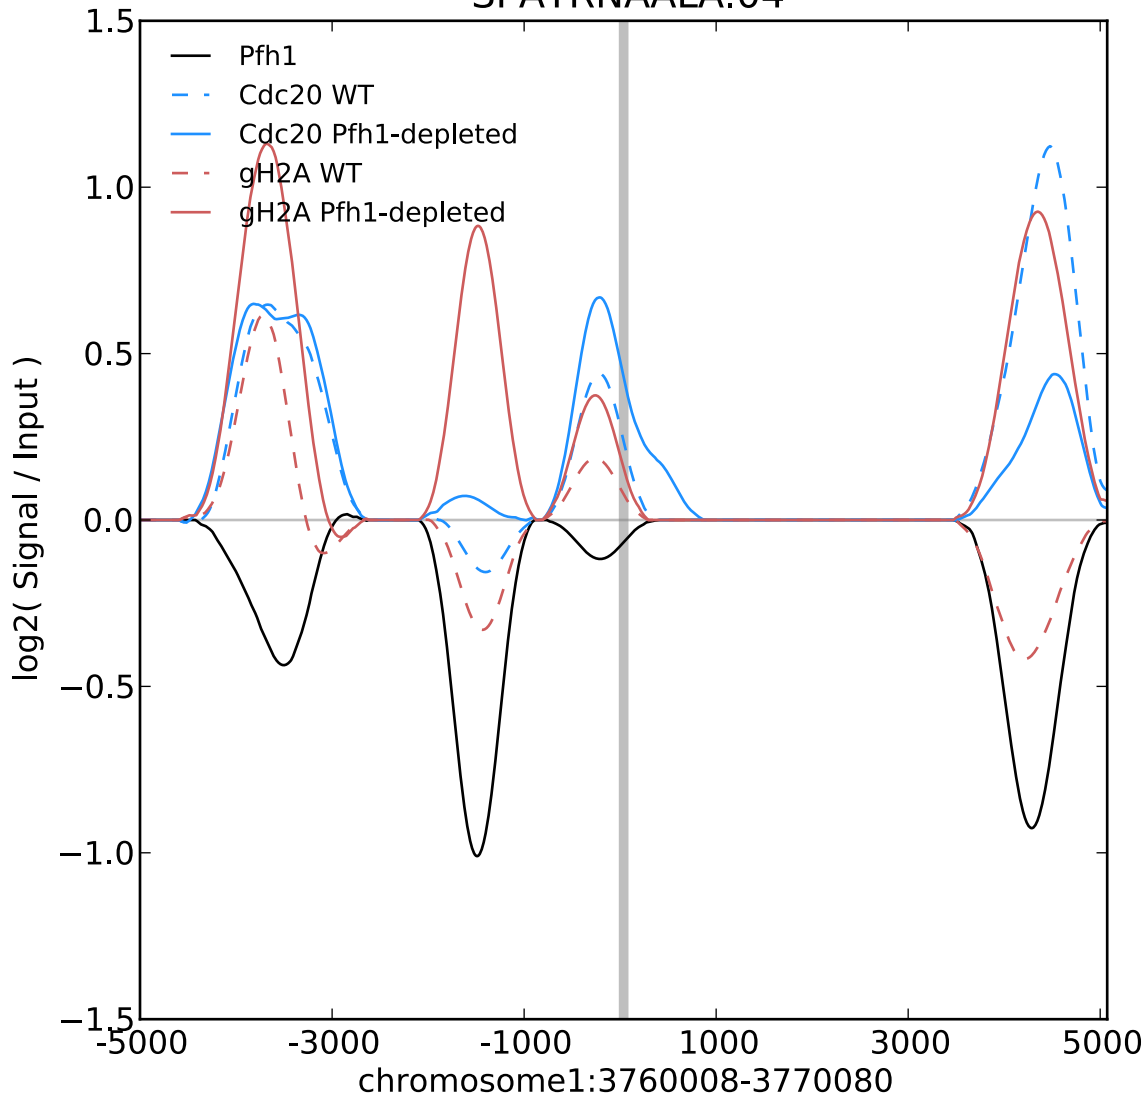



## SPATRNAALA.05

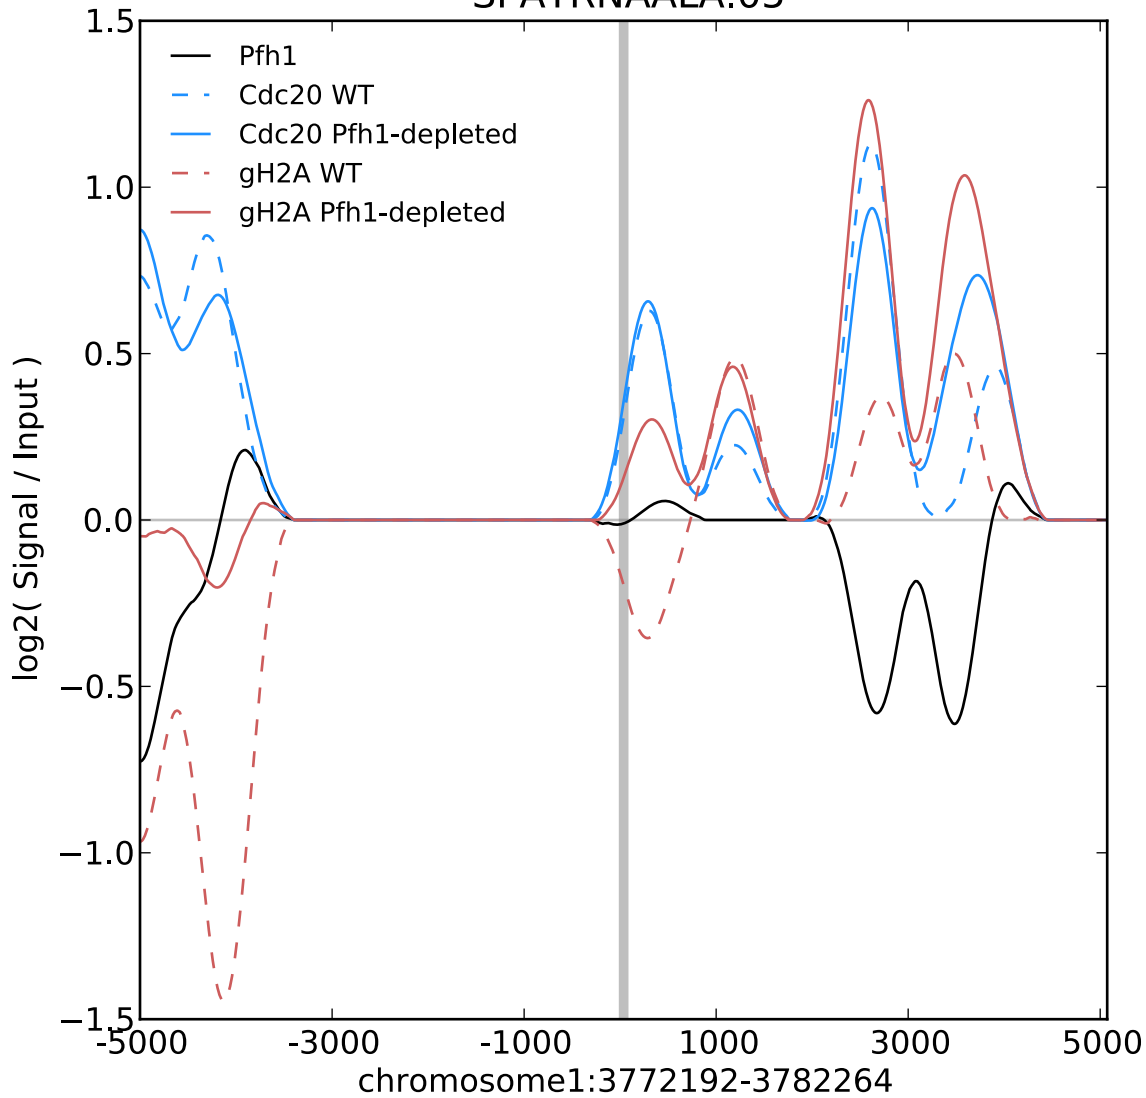

# SPATRNAALA.06

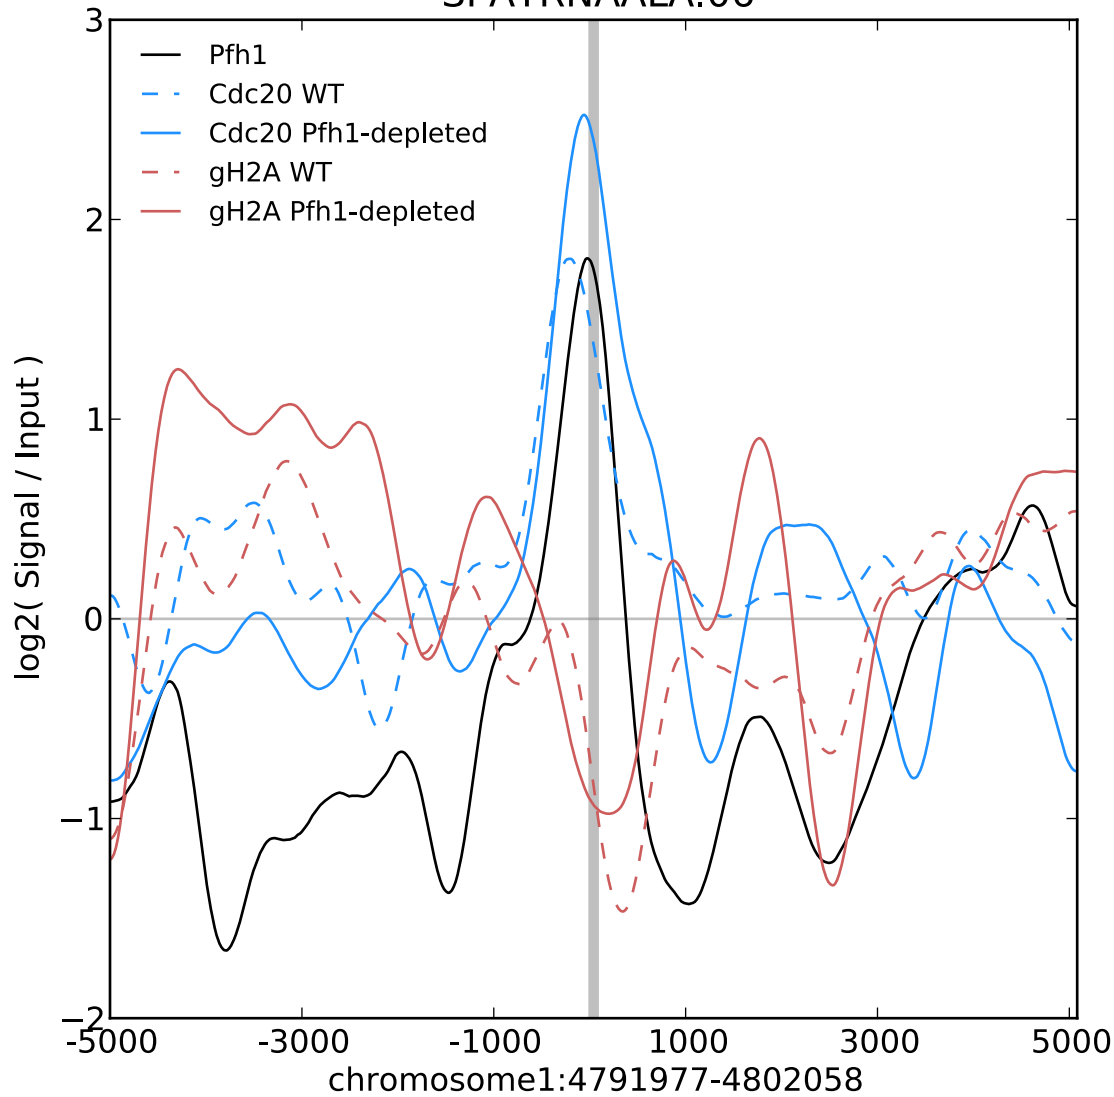

# SPATRNAARG.01

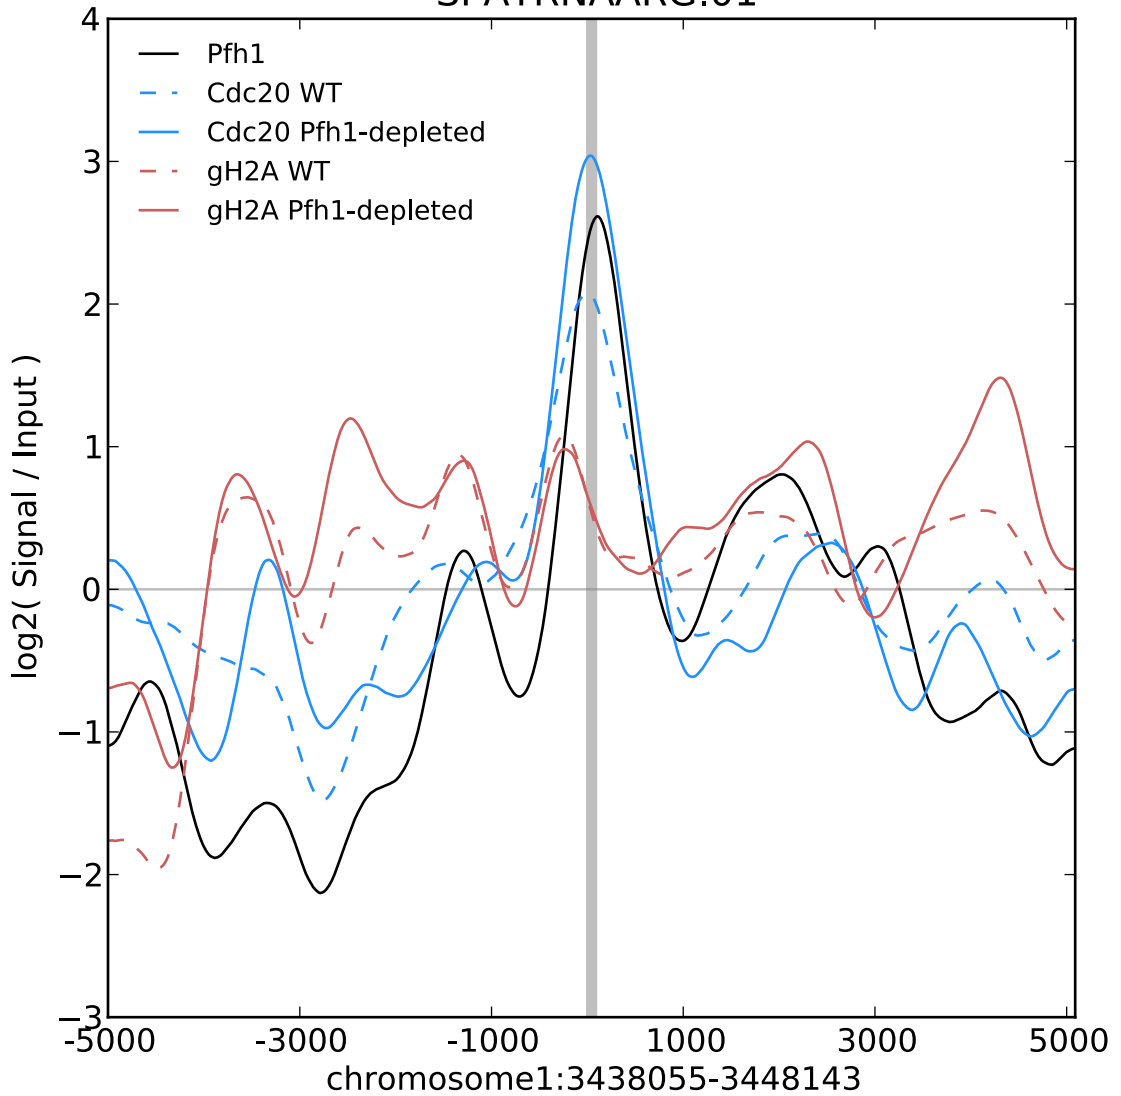

# SPATRNAARG.02

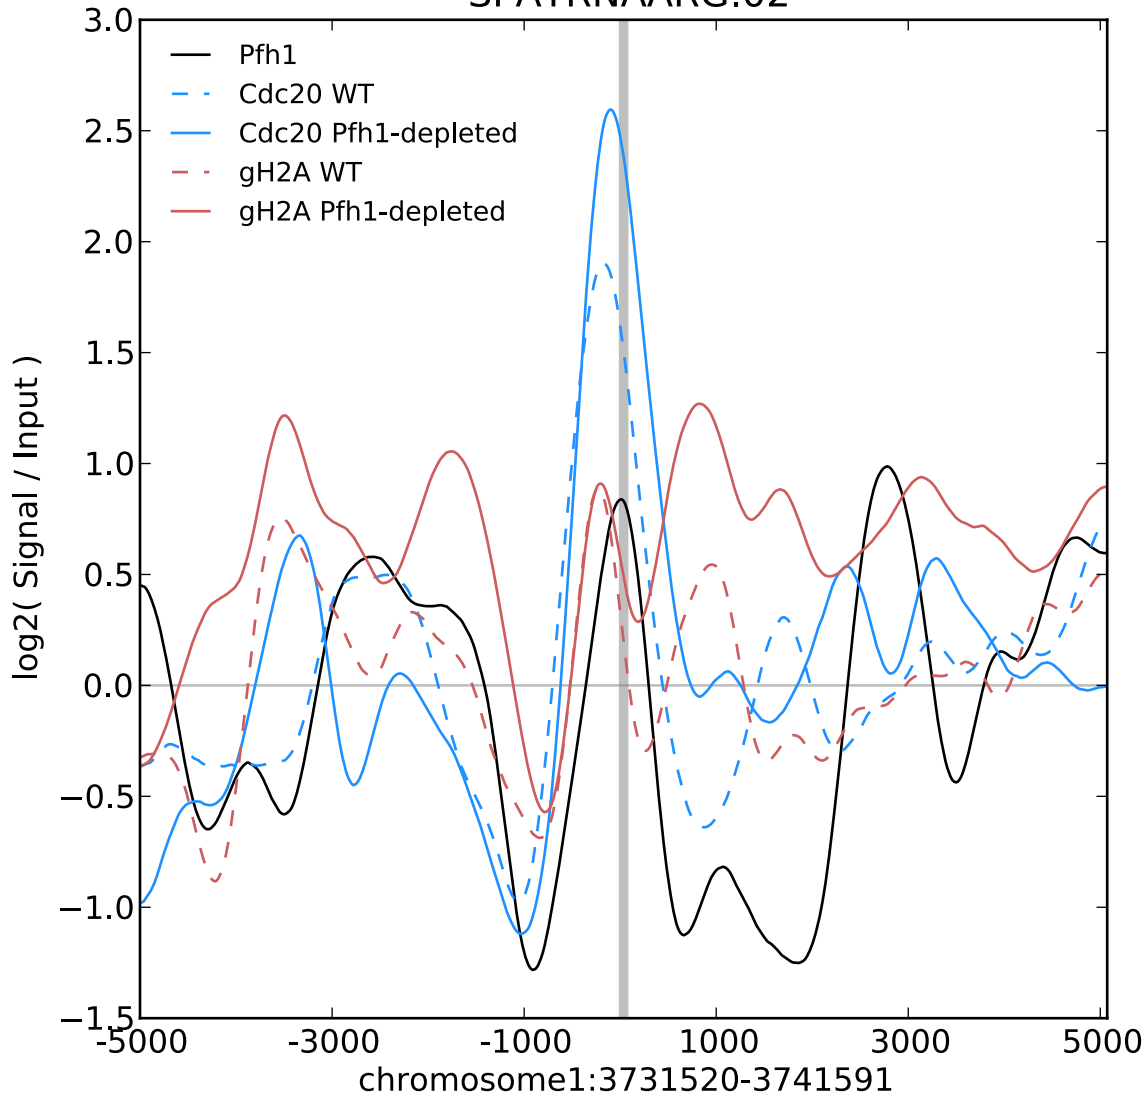

# SPATRNAARG.03

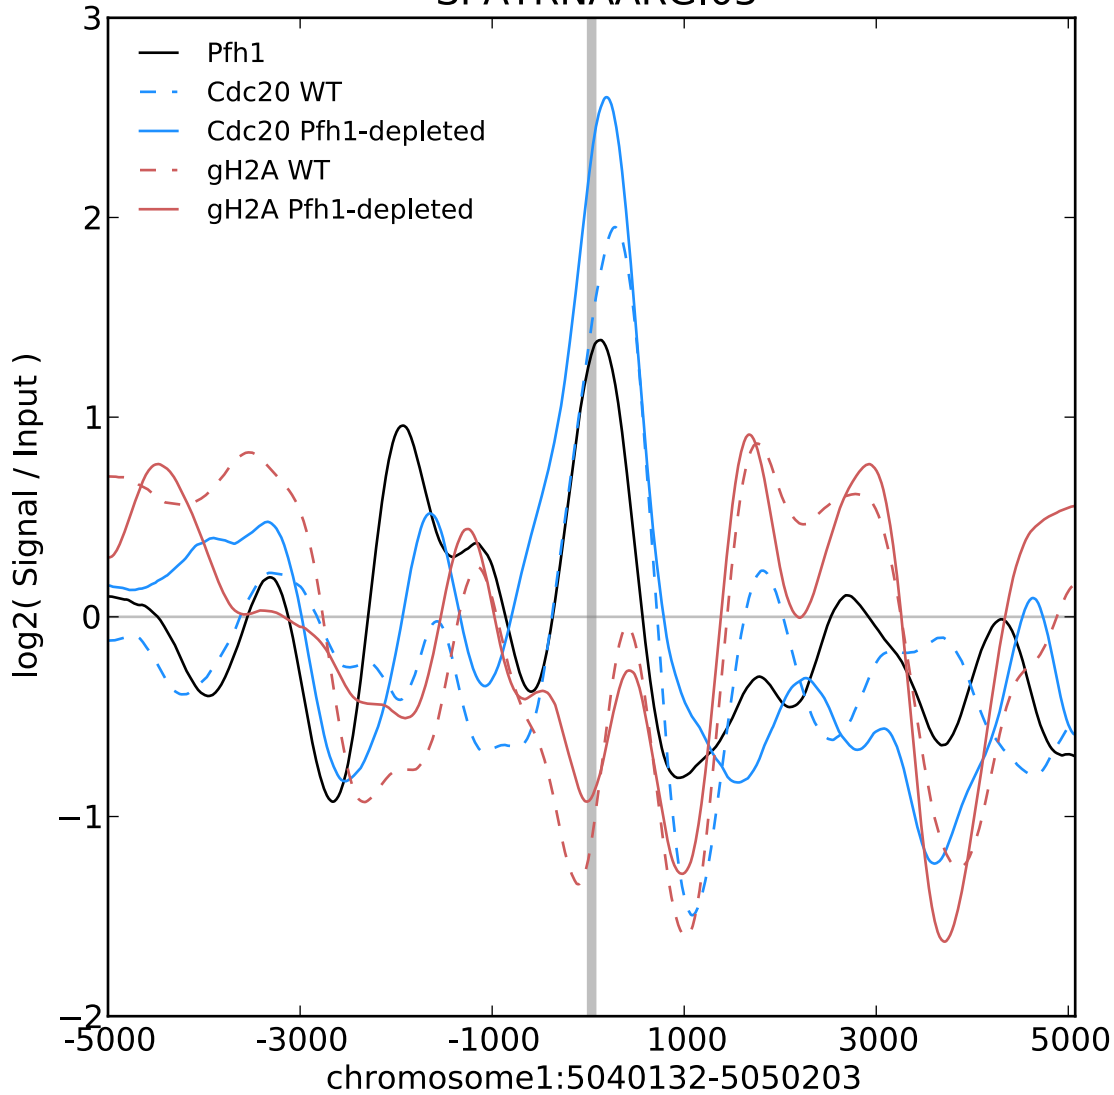

# SPATRNAASP.01

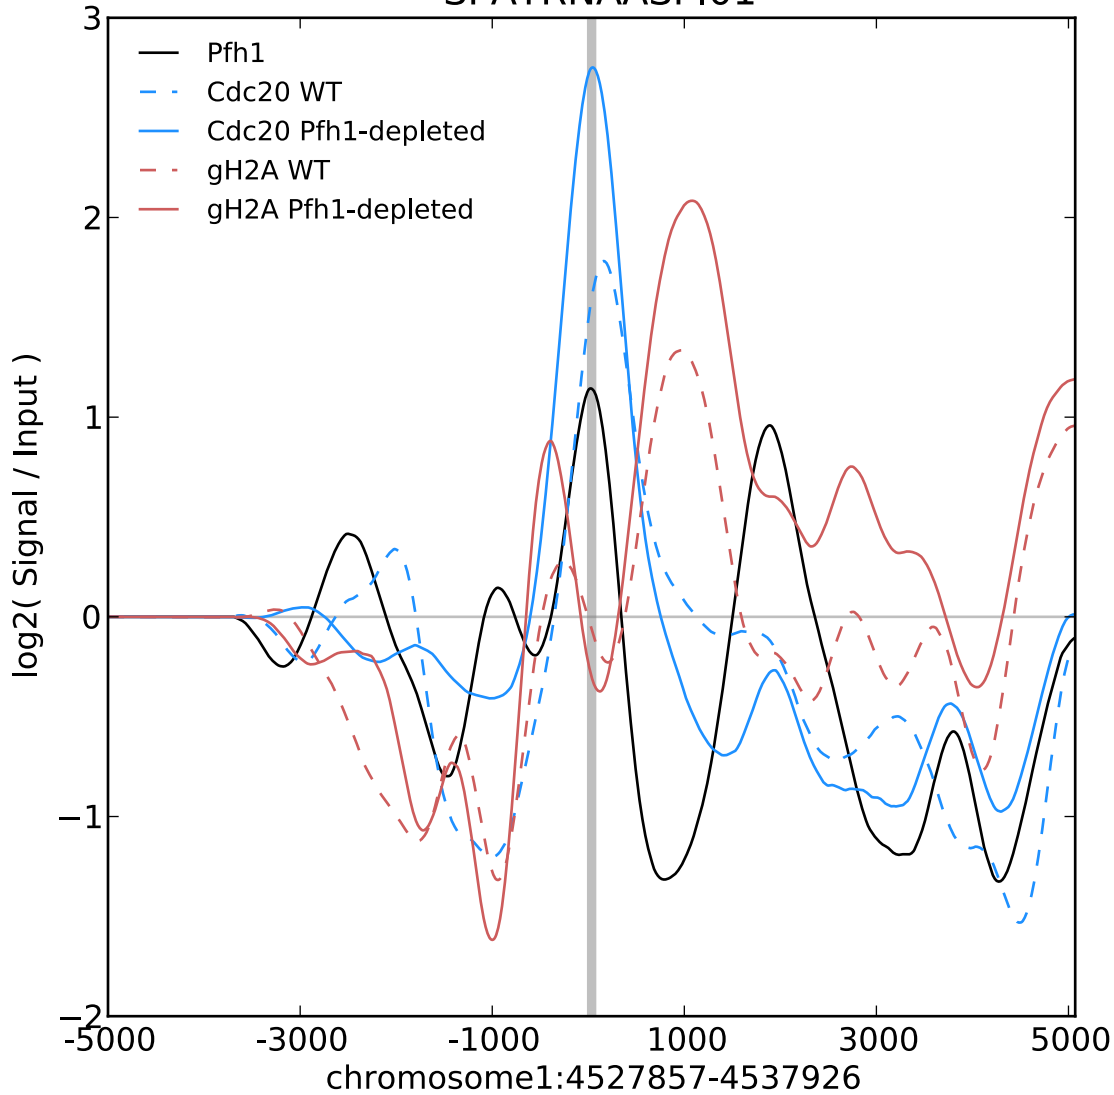

# SPATRNAASP.02

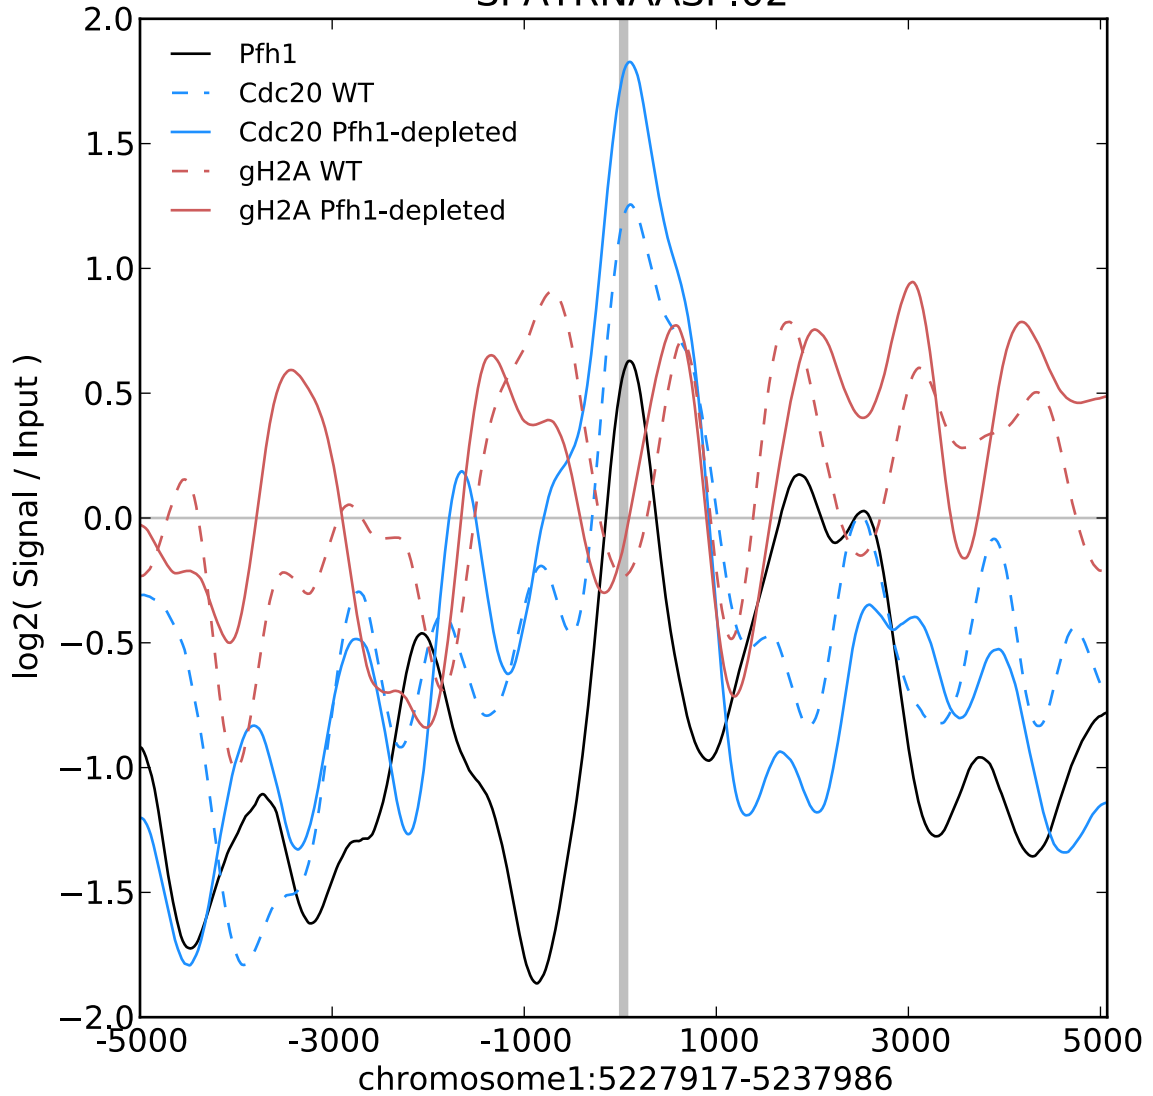

# SPATRACYS.01

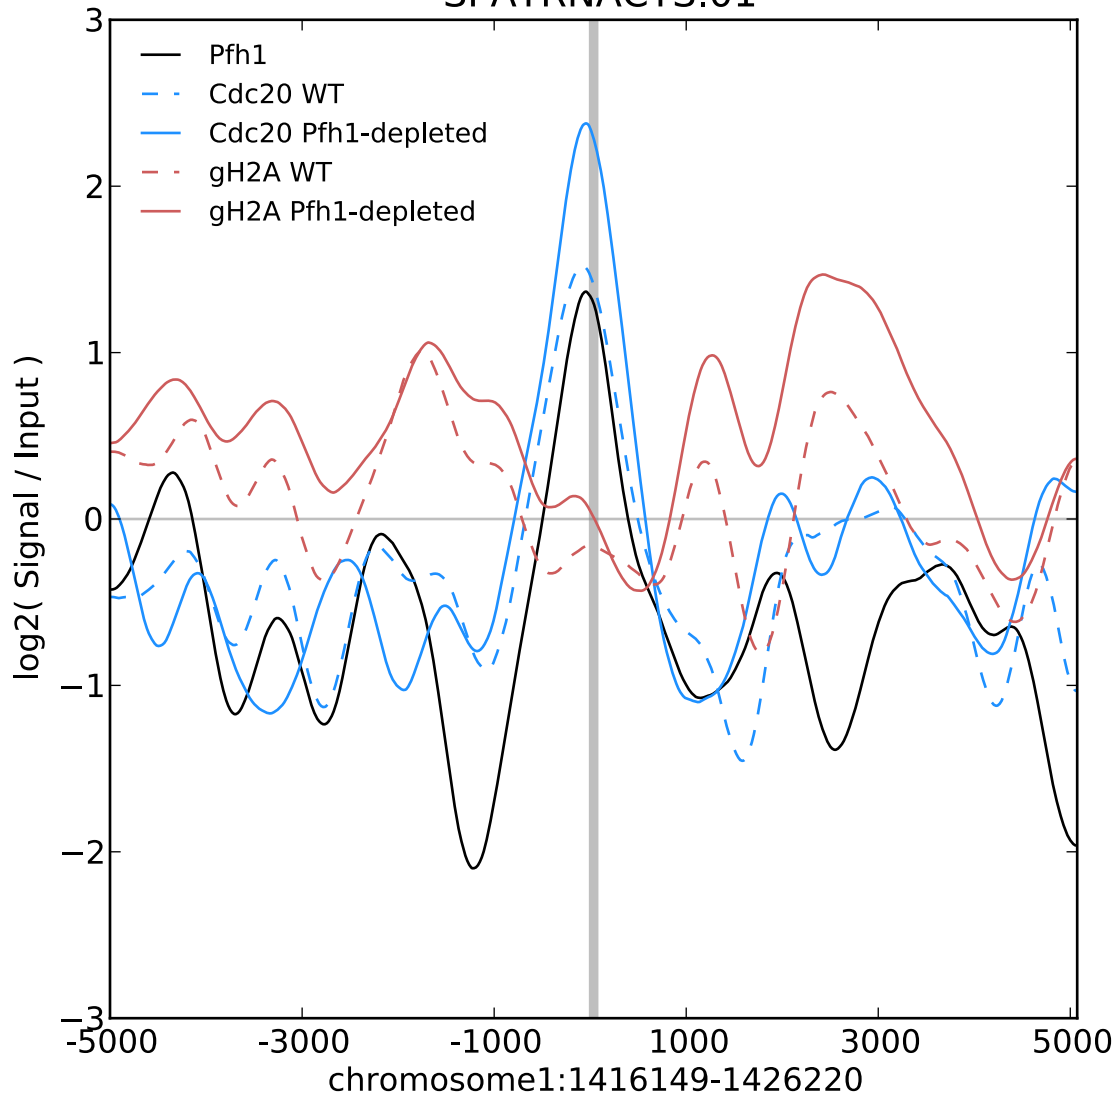



# SPATRACYS.02

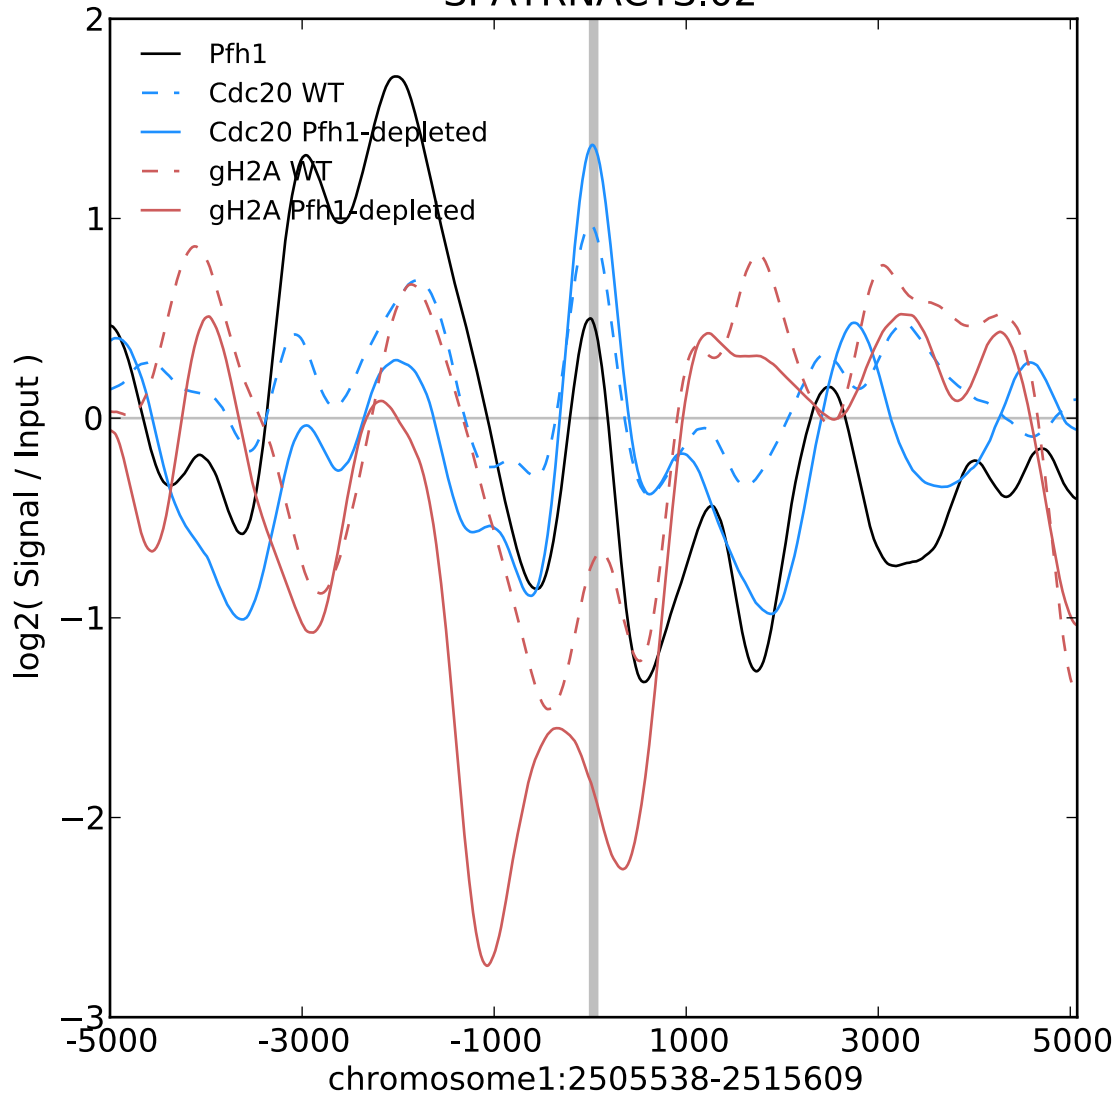

# SPATRACYS.03

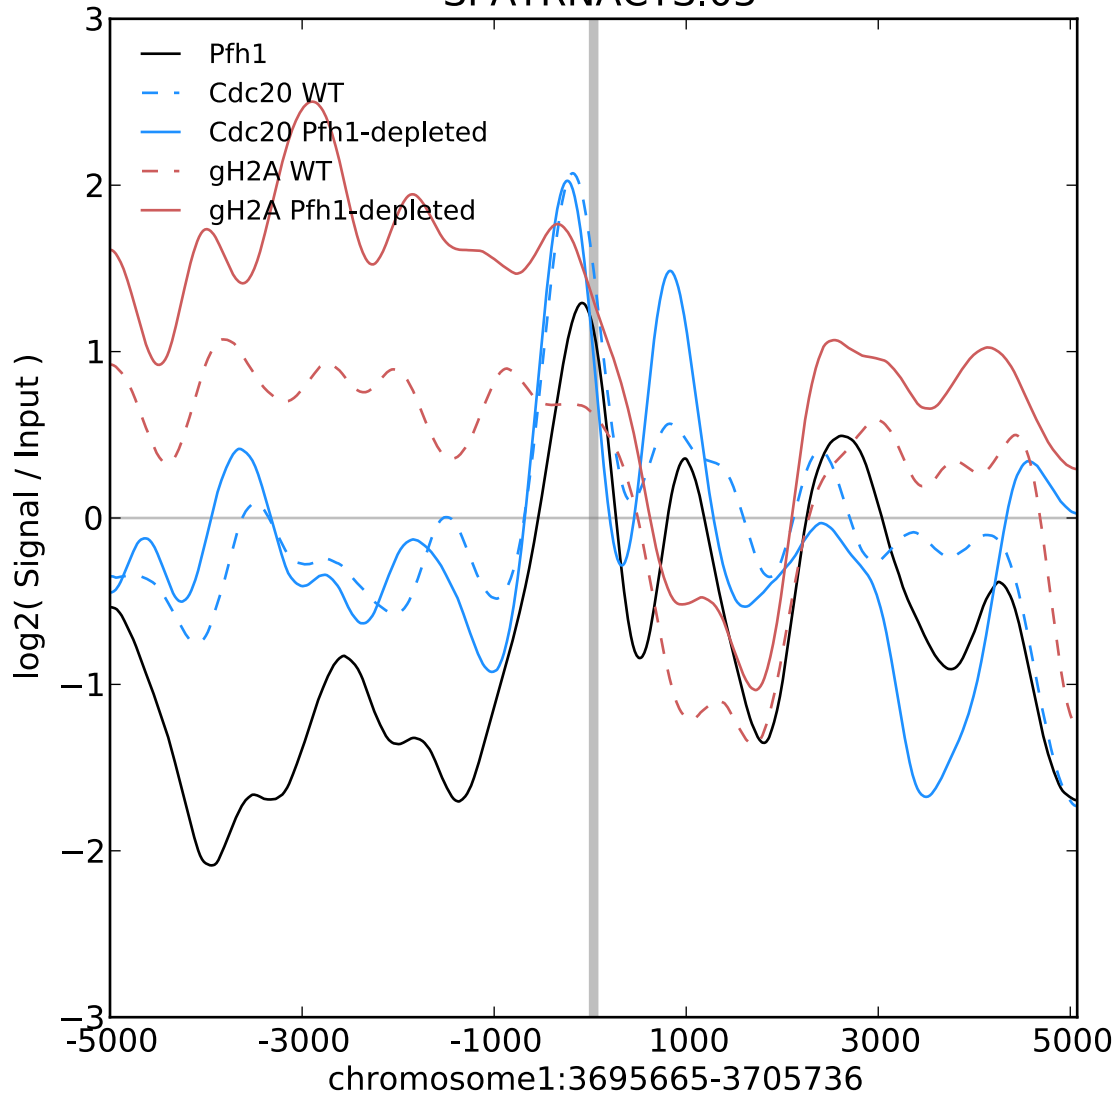

# SPATR NAGLU.01

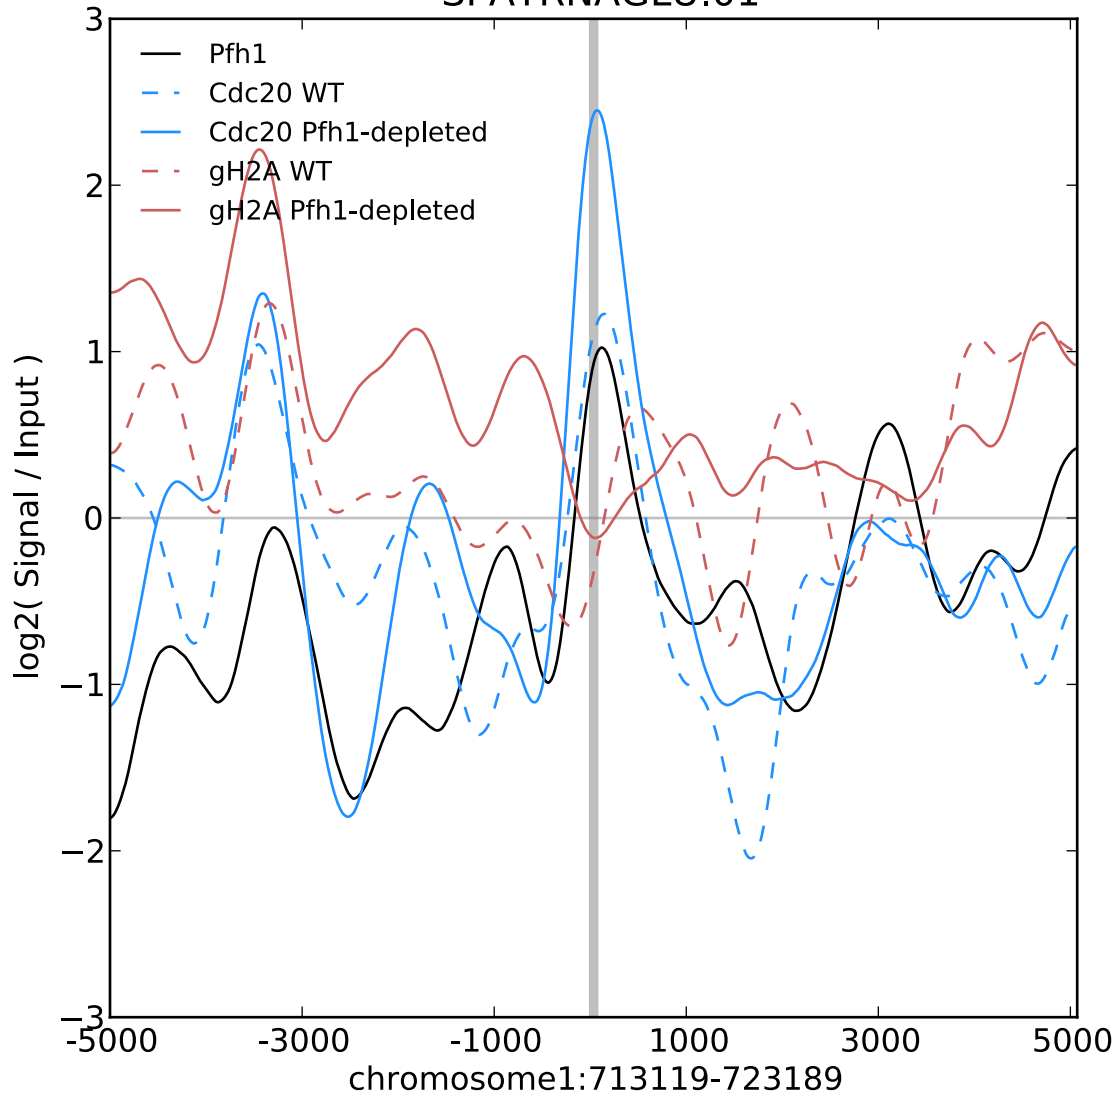

# SPATR NAGLU.02

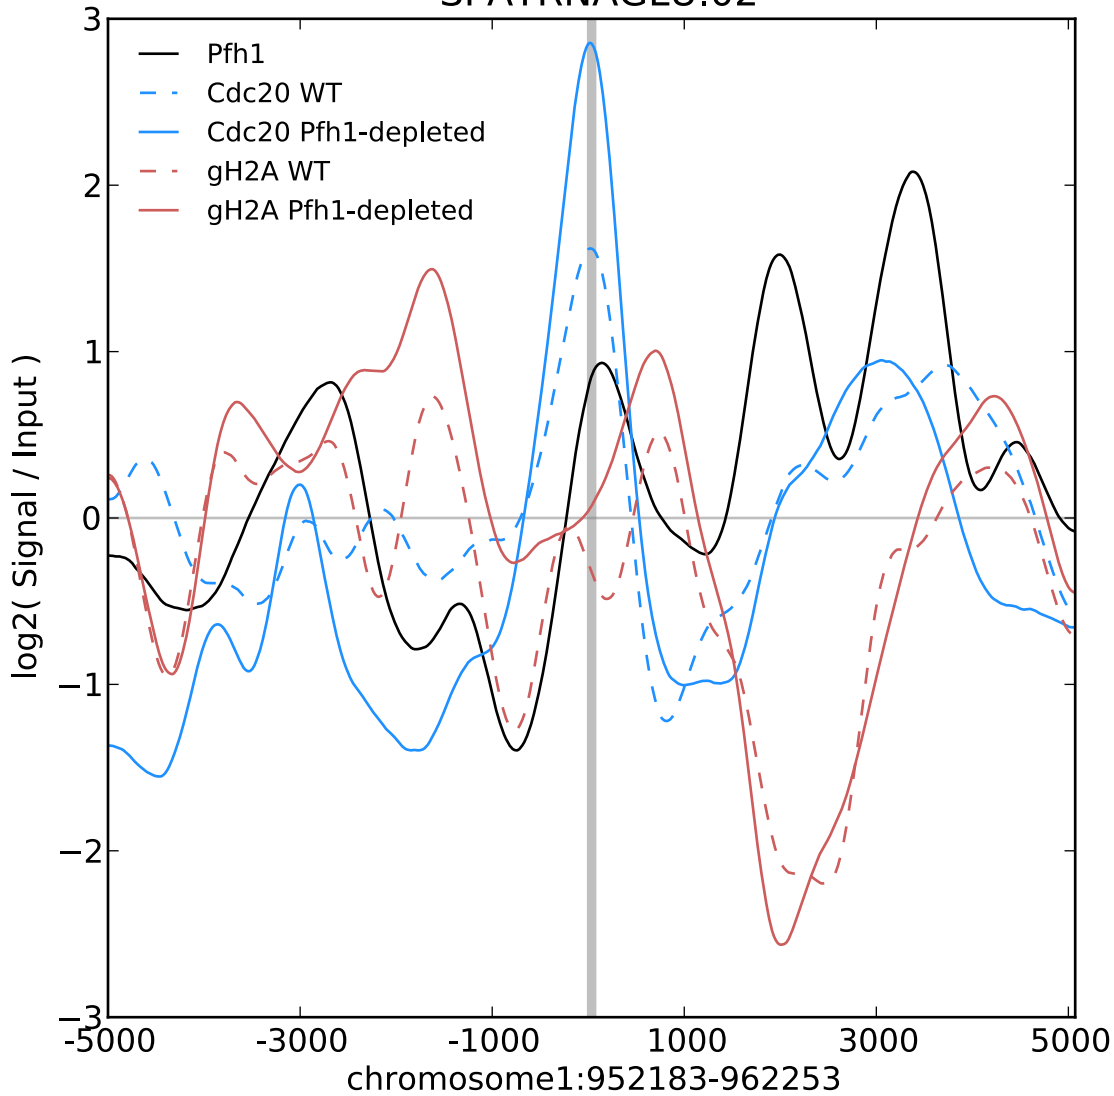

# SPATR NAGLU.03

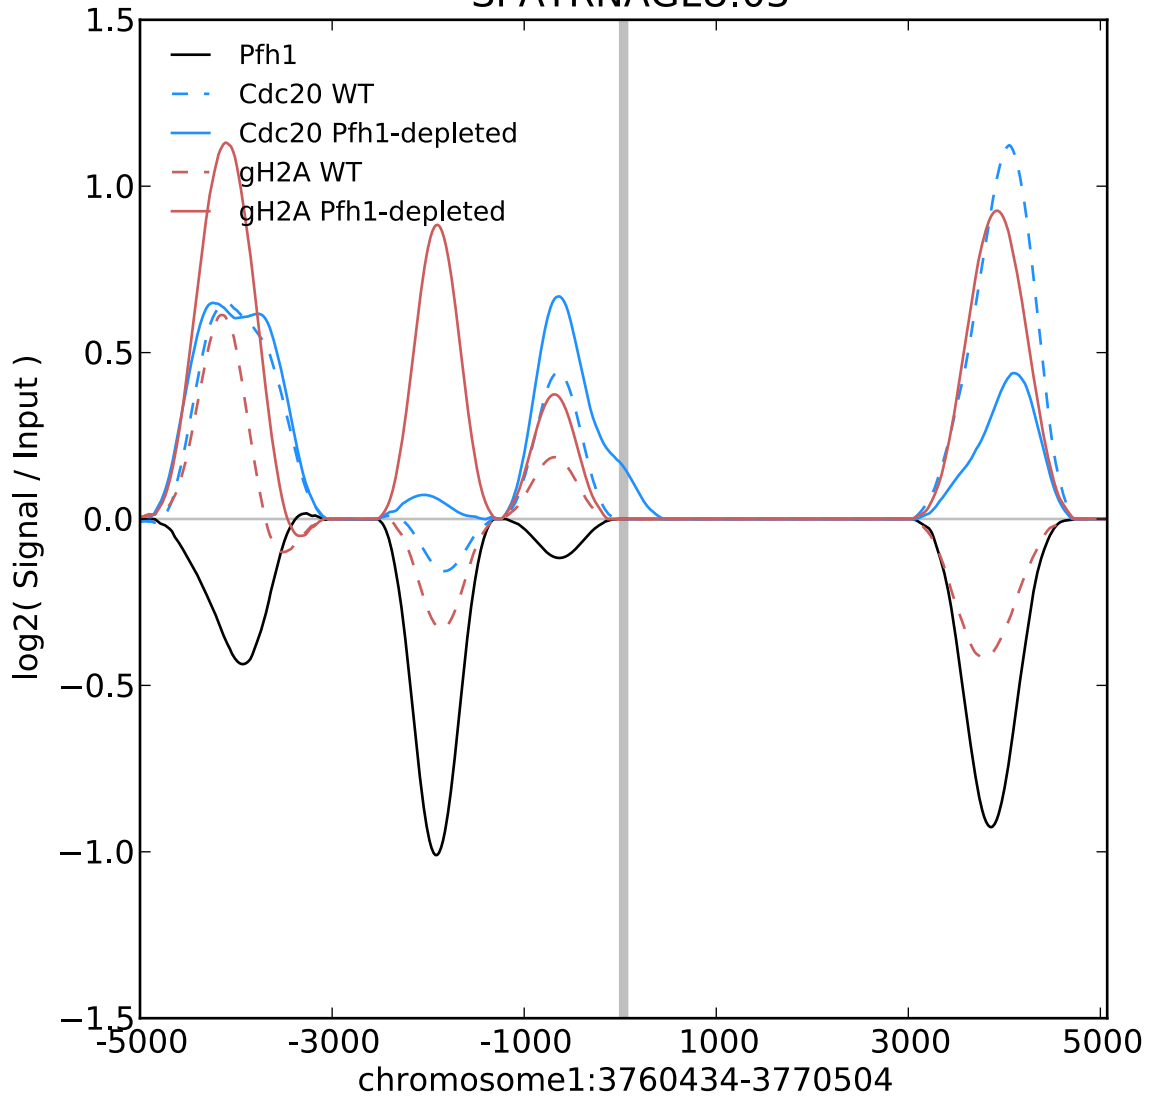

# SPATR NAGLU.04

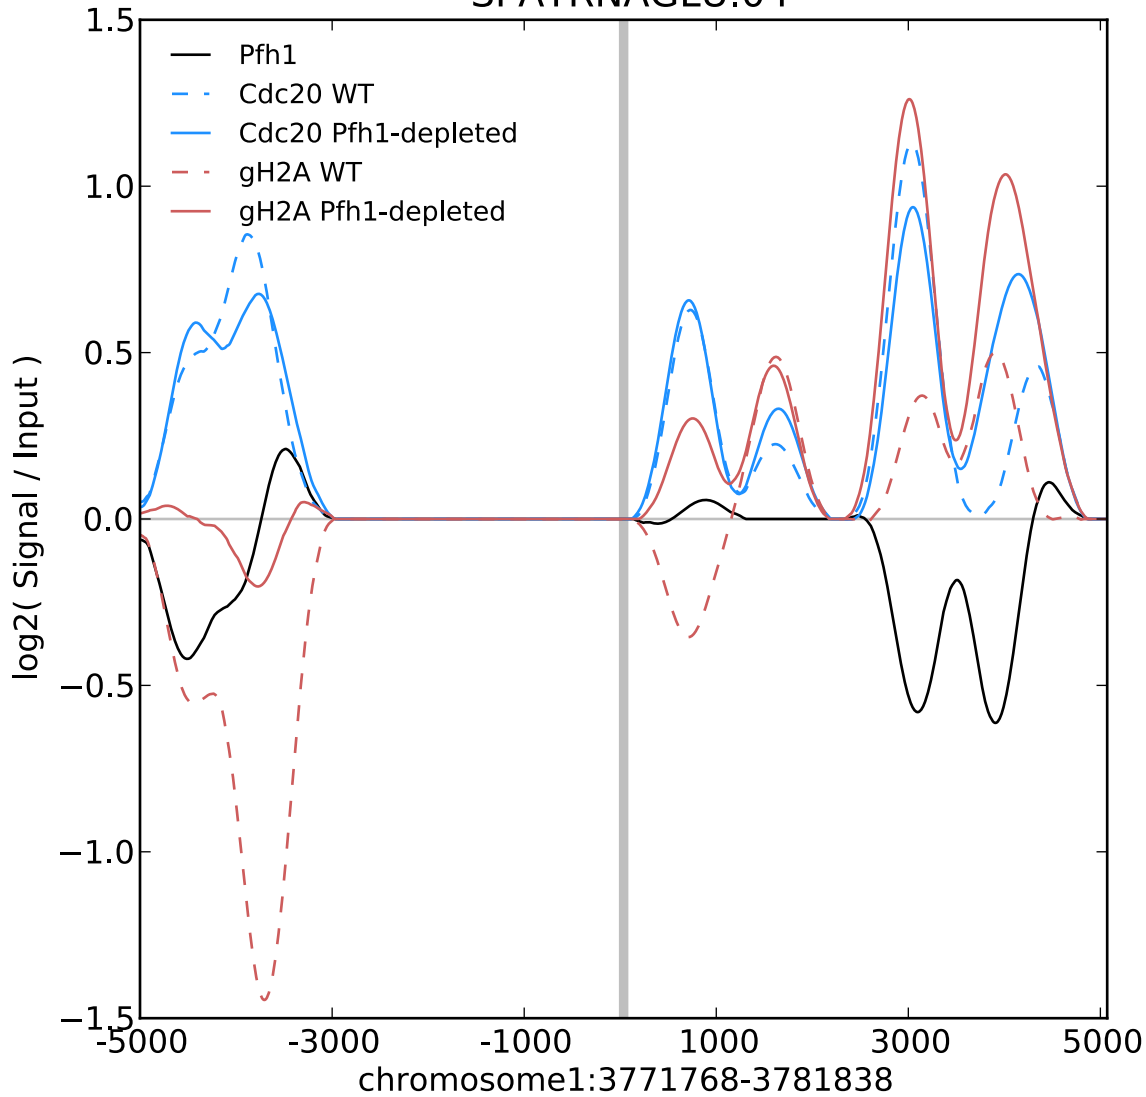

# SPATR NAGLY.01

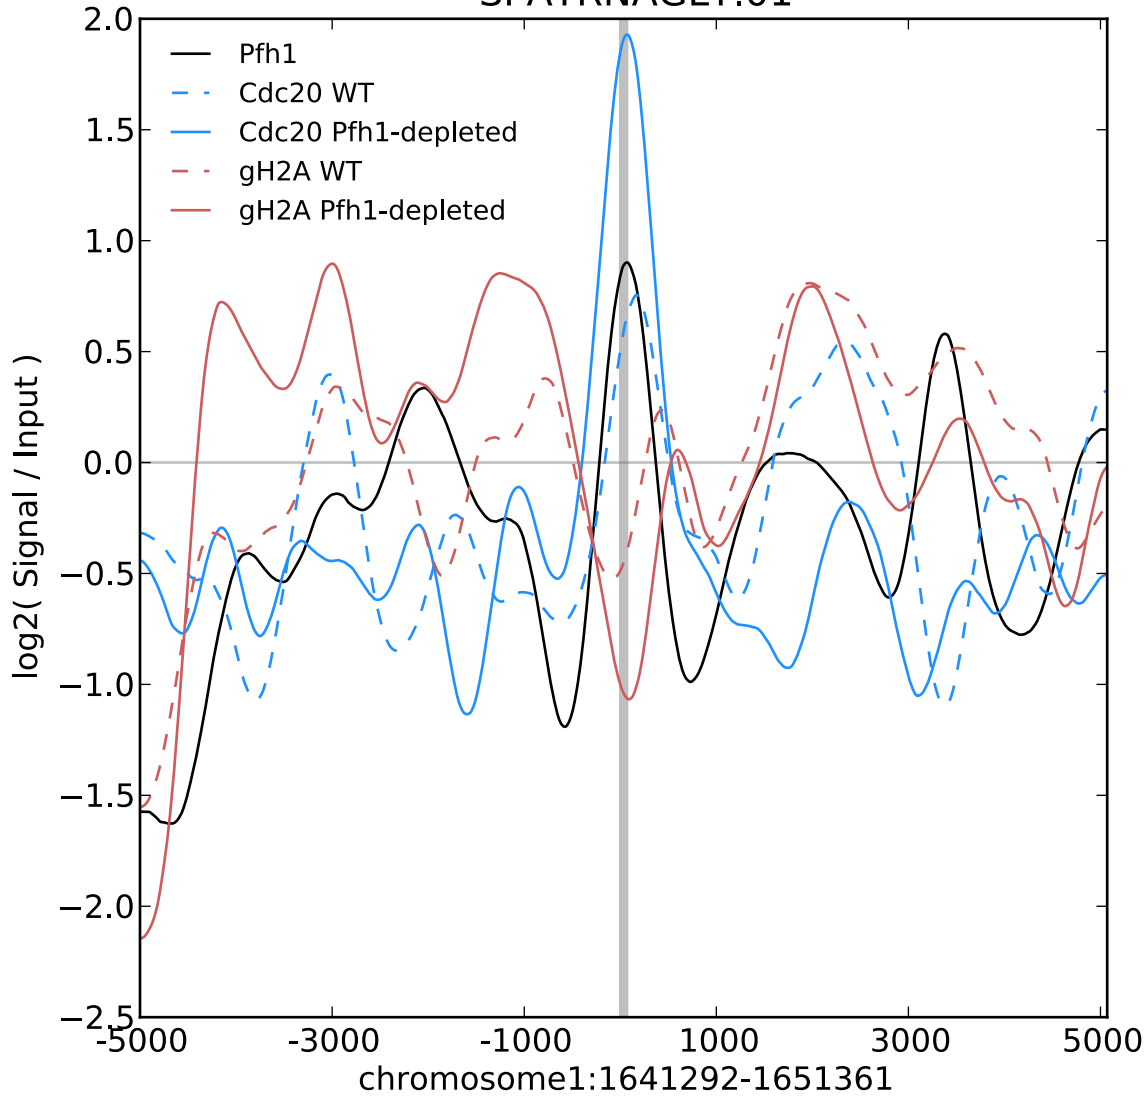

# SPATR NAGLY.02

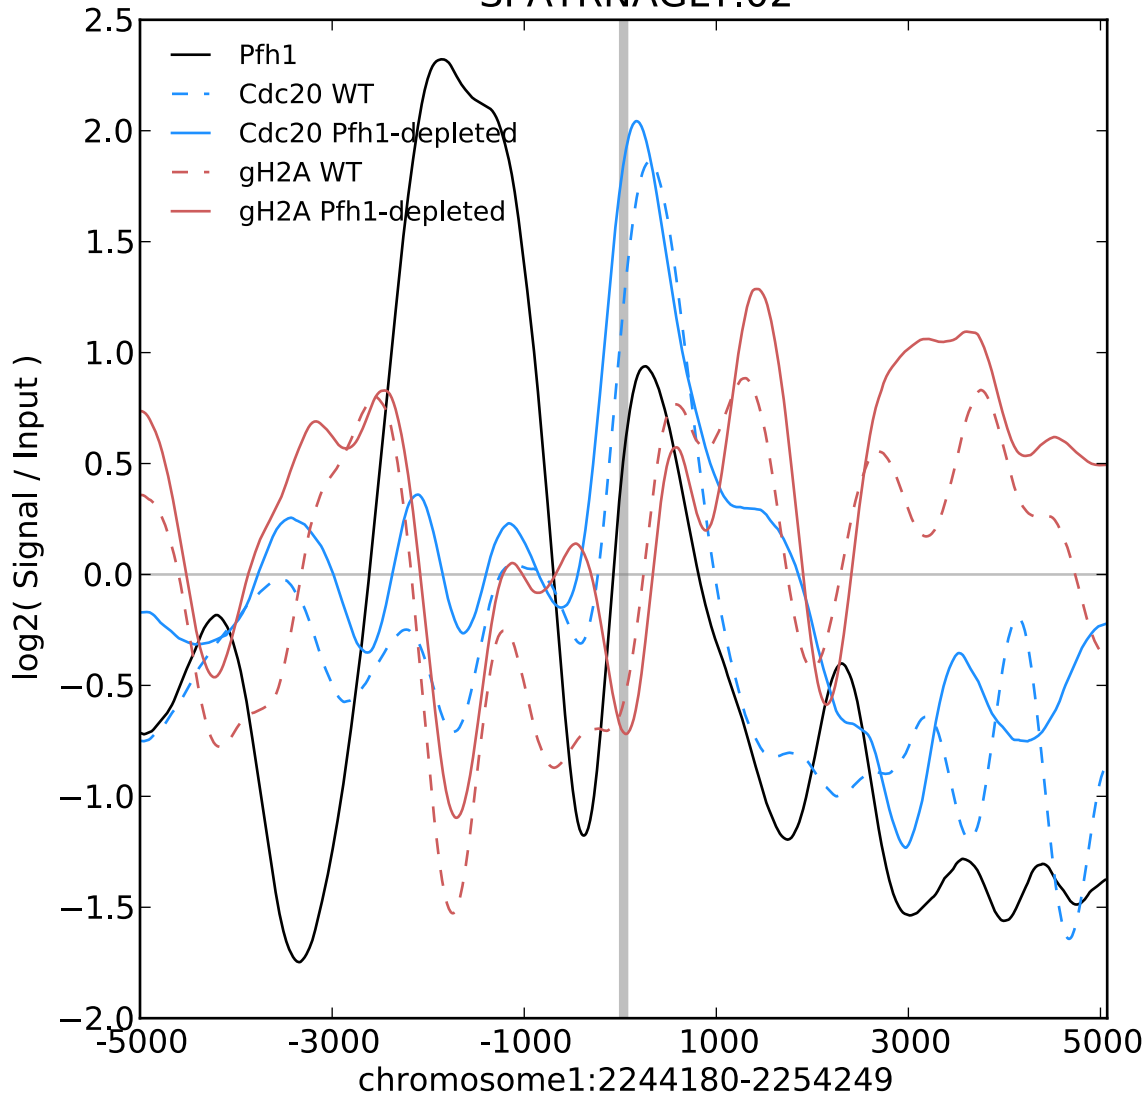



# SPATRNAILE.01

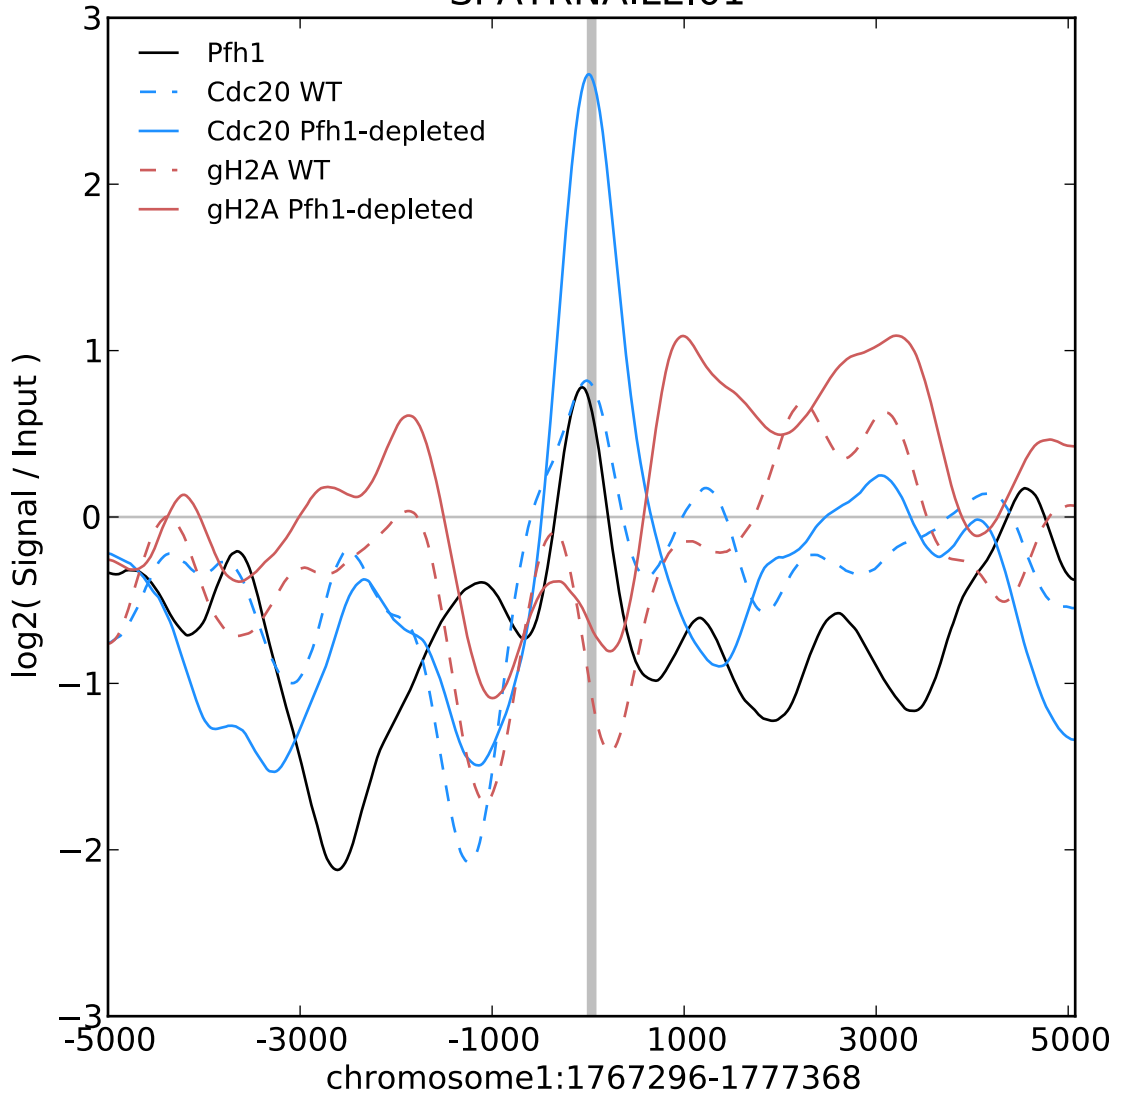

# SPATRNAILE.02

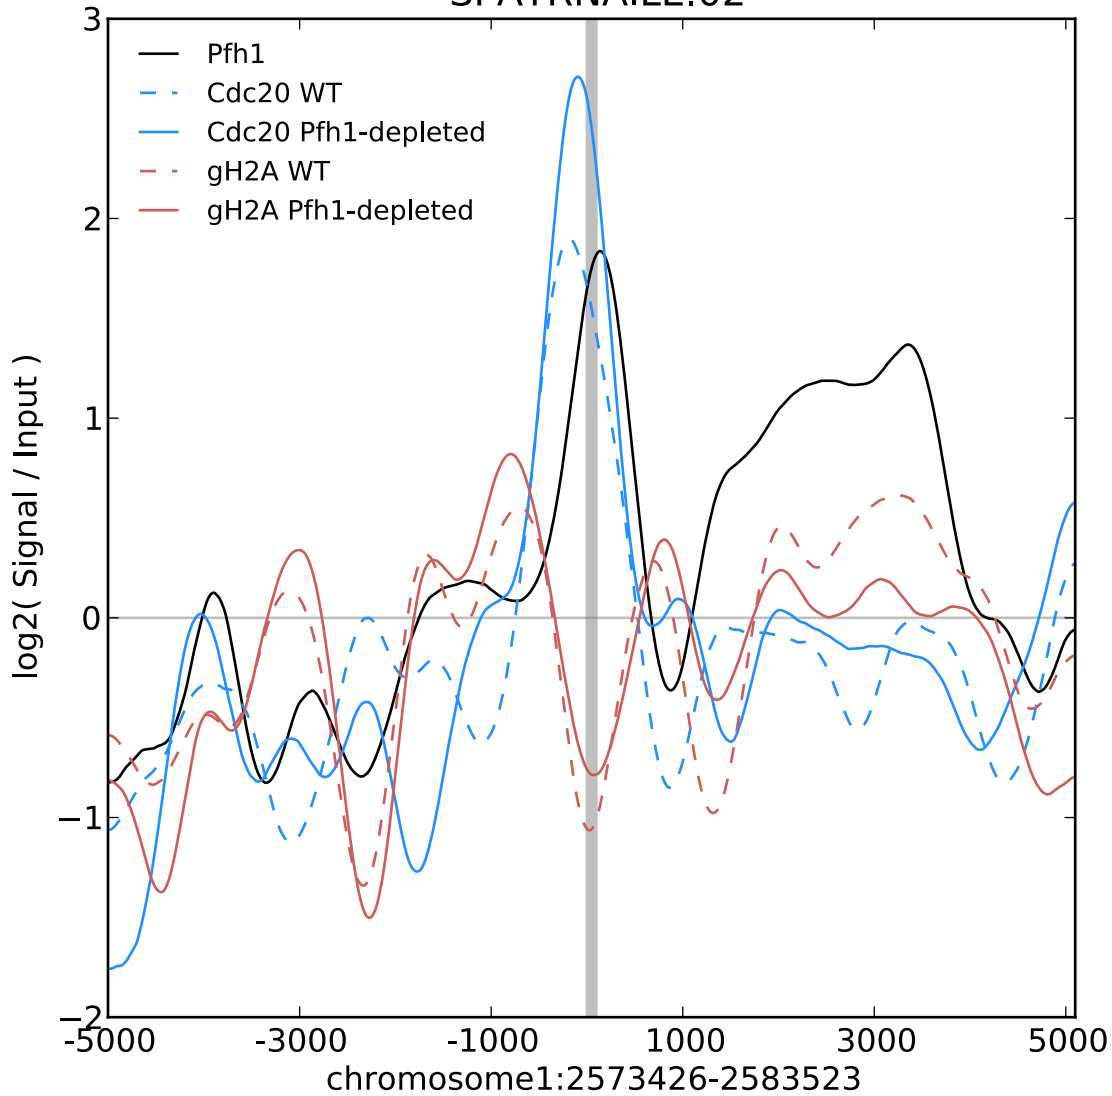

# SPATRNAILE.03

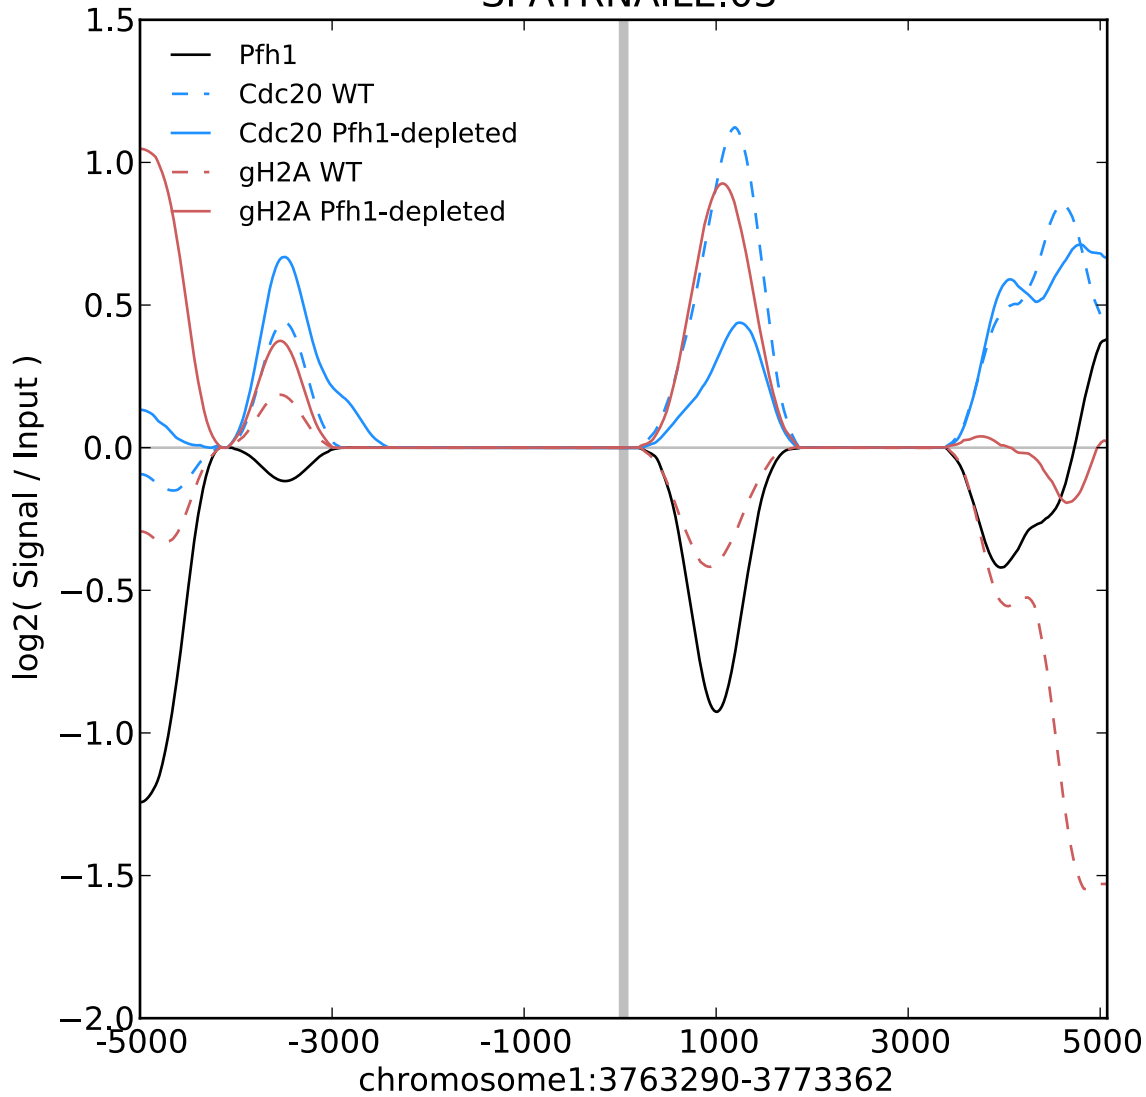

# SPATRNAILE.04

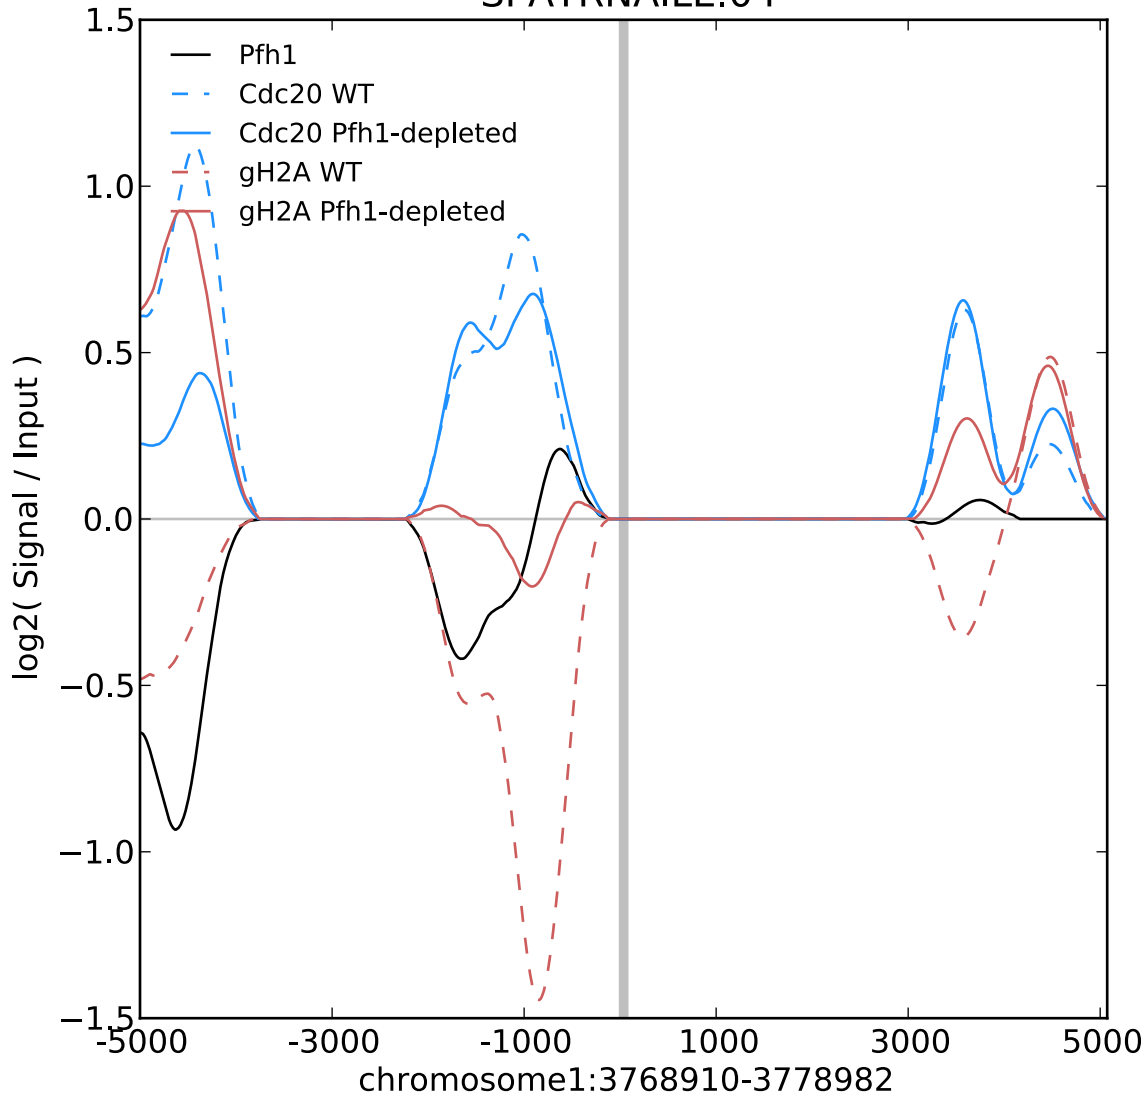

# SPATRNALEU.01

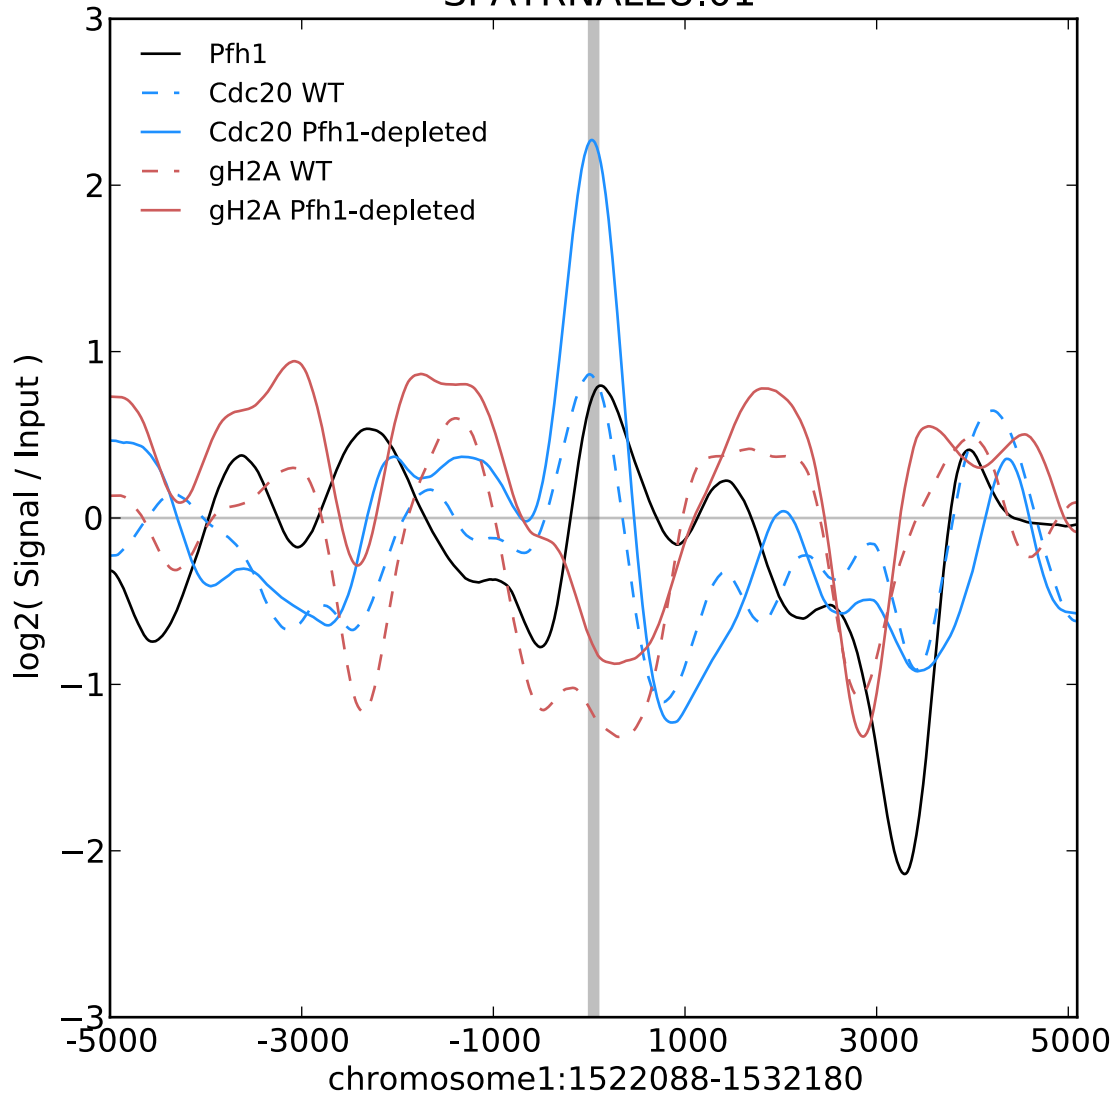

# SPATRNALEU.02

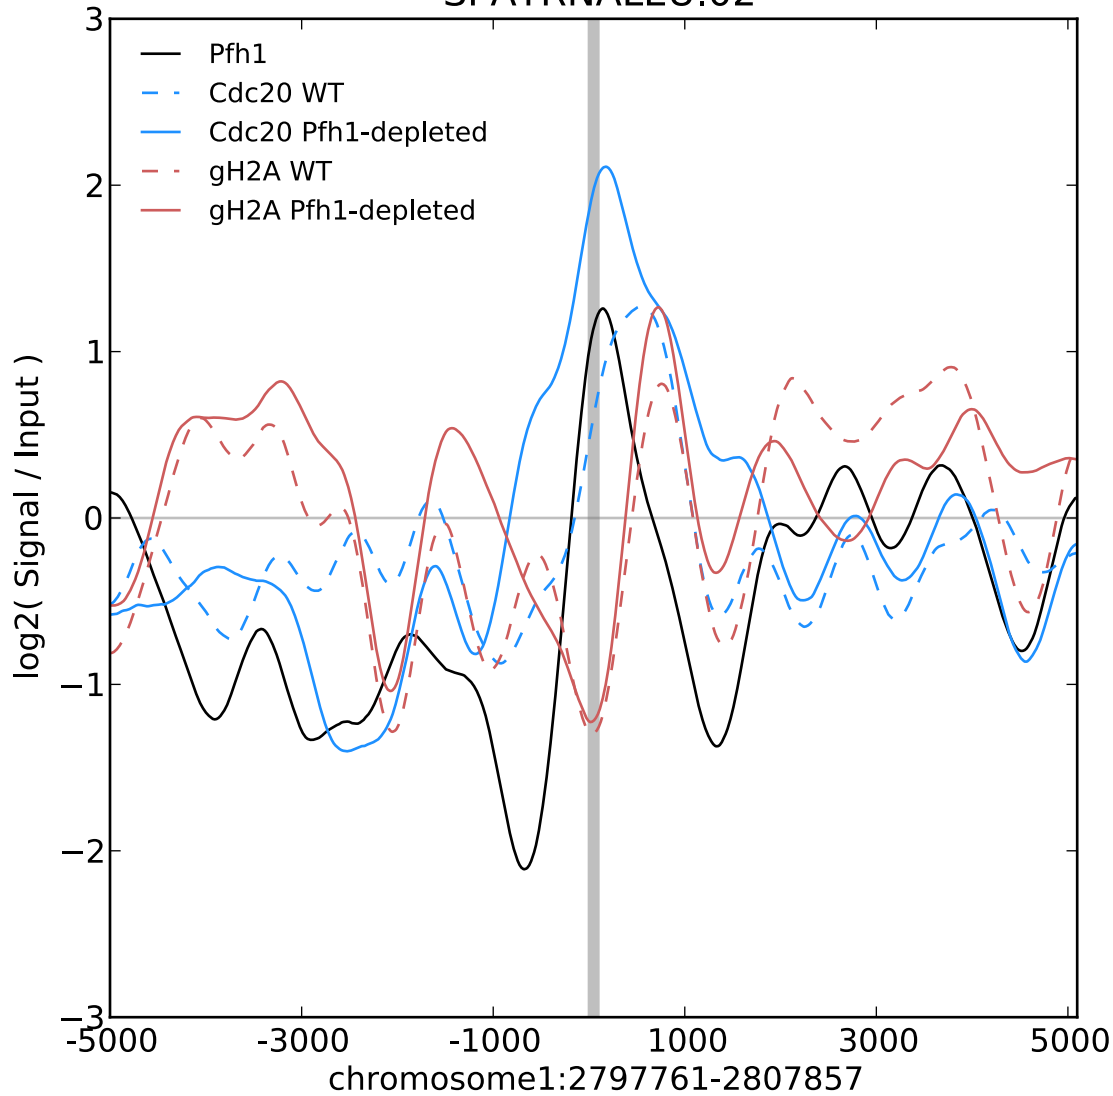

## SPATRNALEU.03

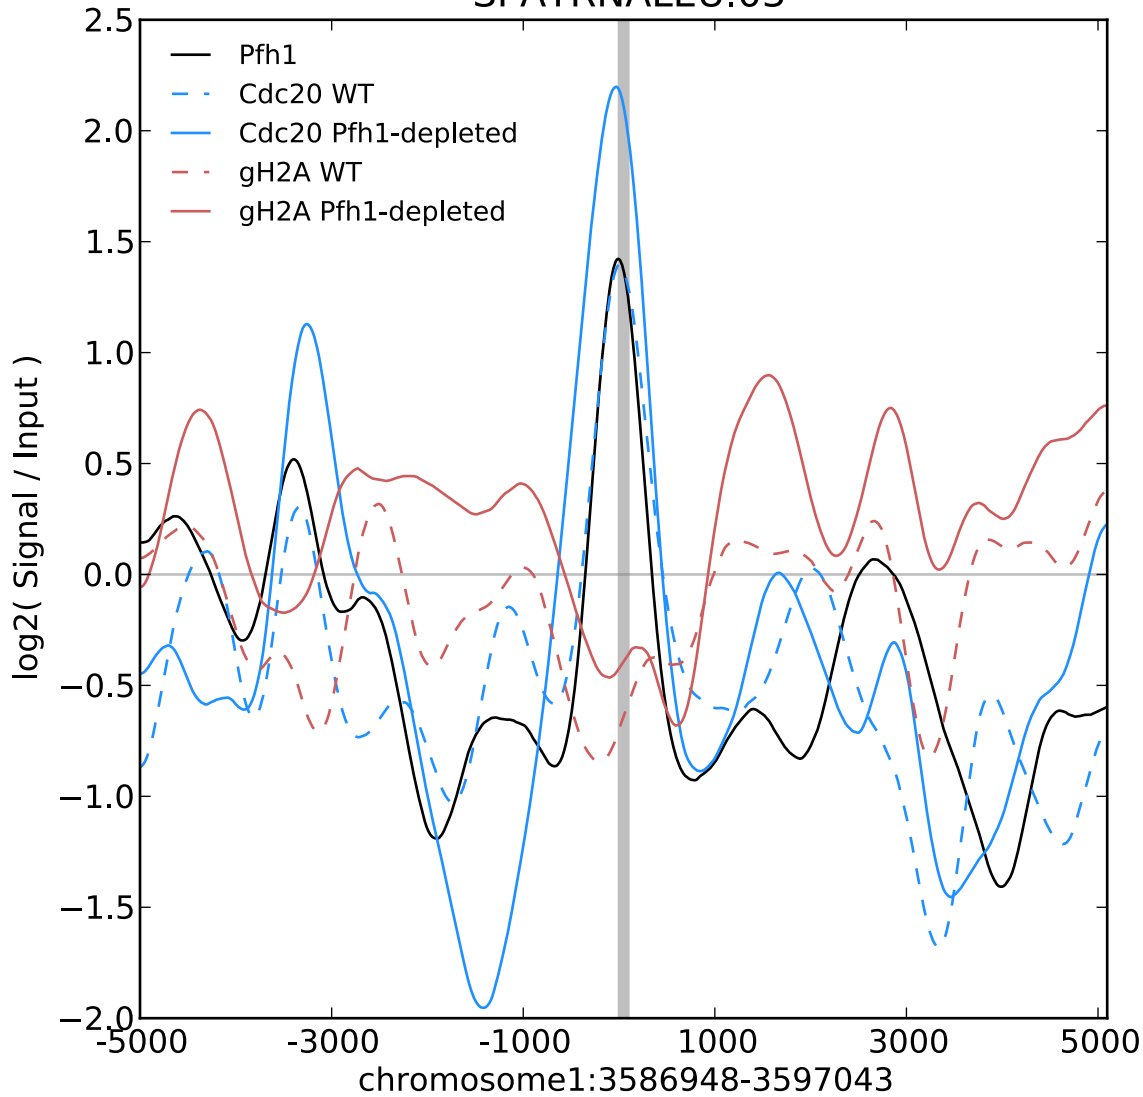

# SPATRNALEU.04

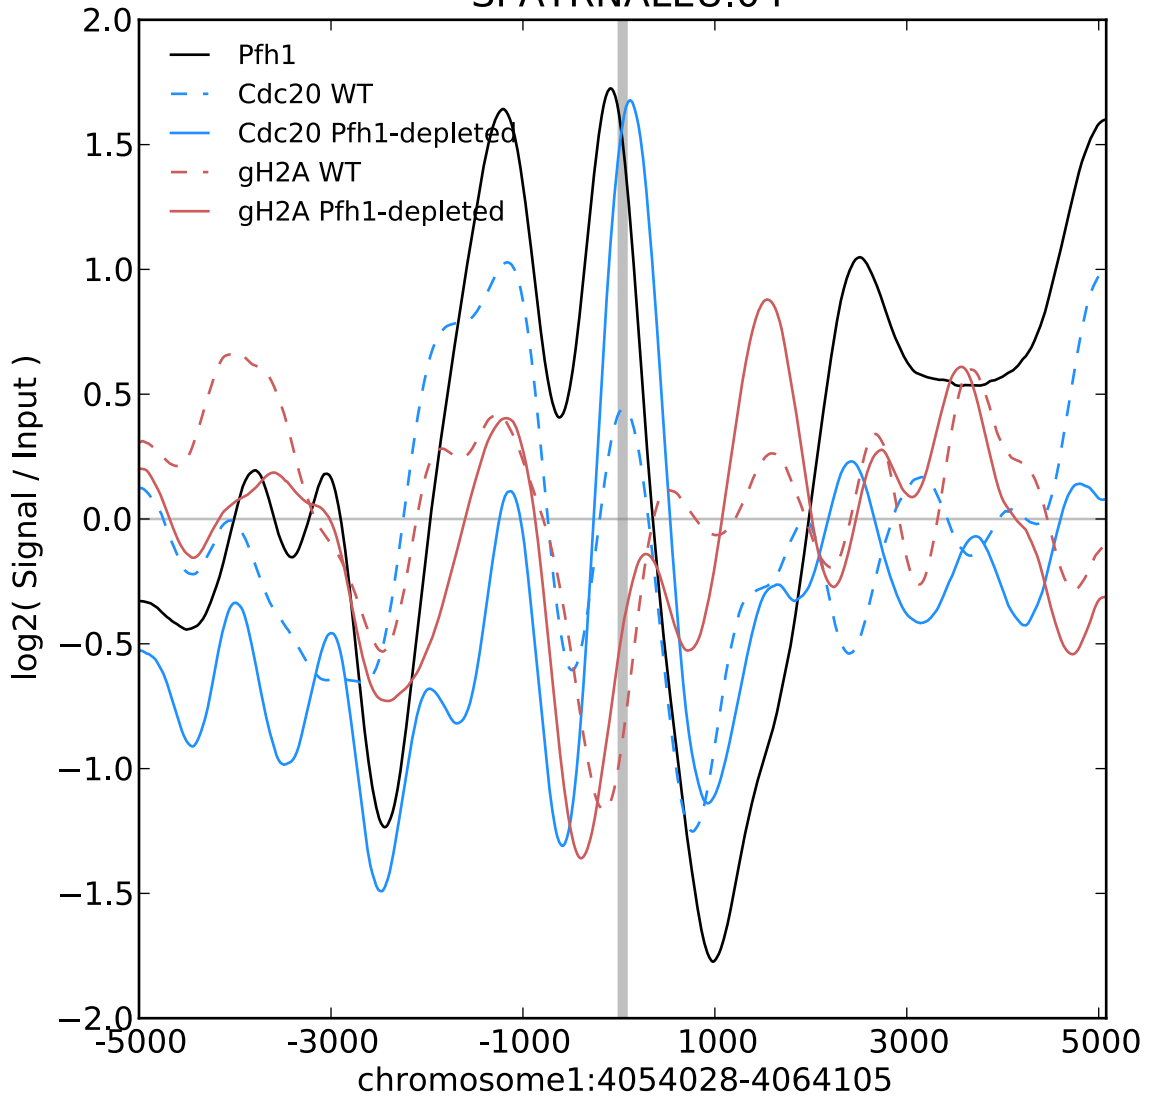



# SPATRANALYS.01

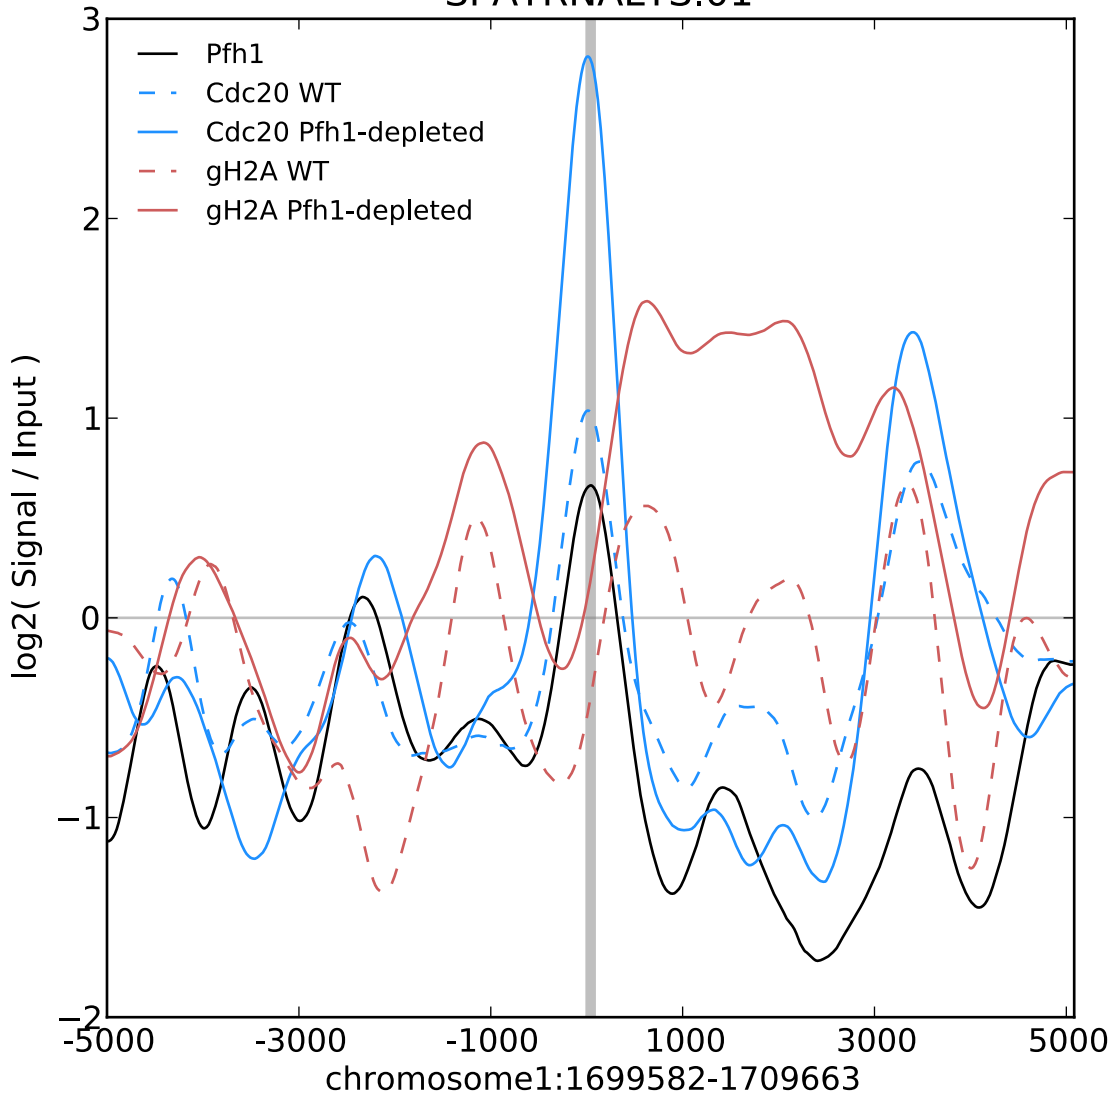

# SPATRANALYS.02

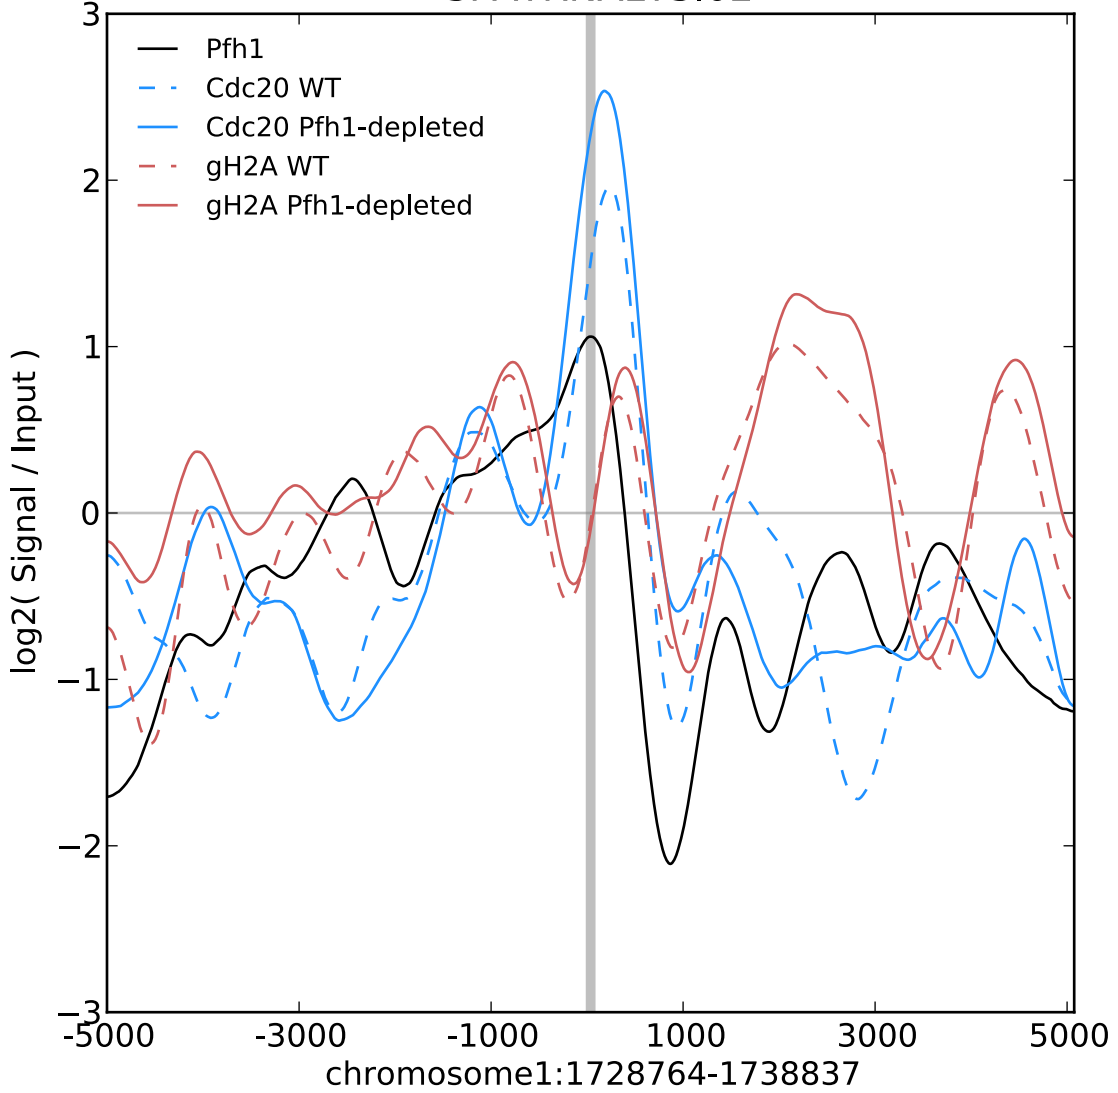

# SPATRANALYS.03

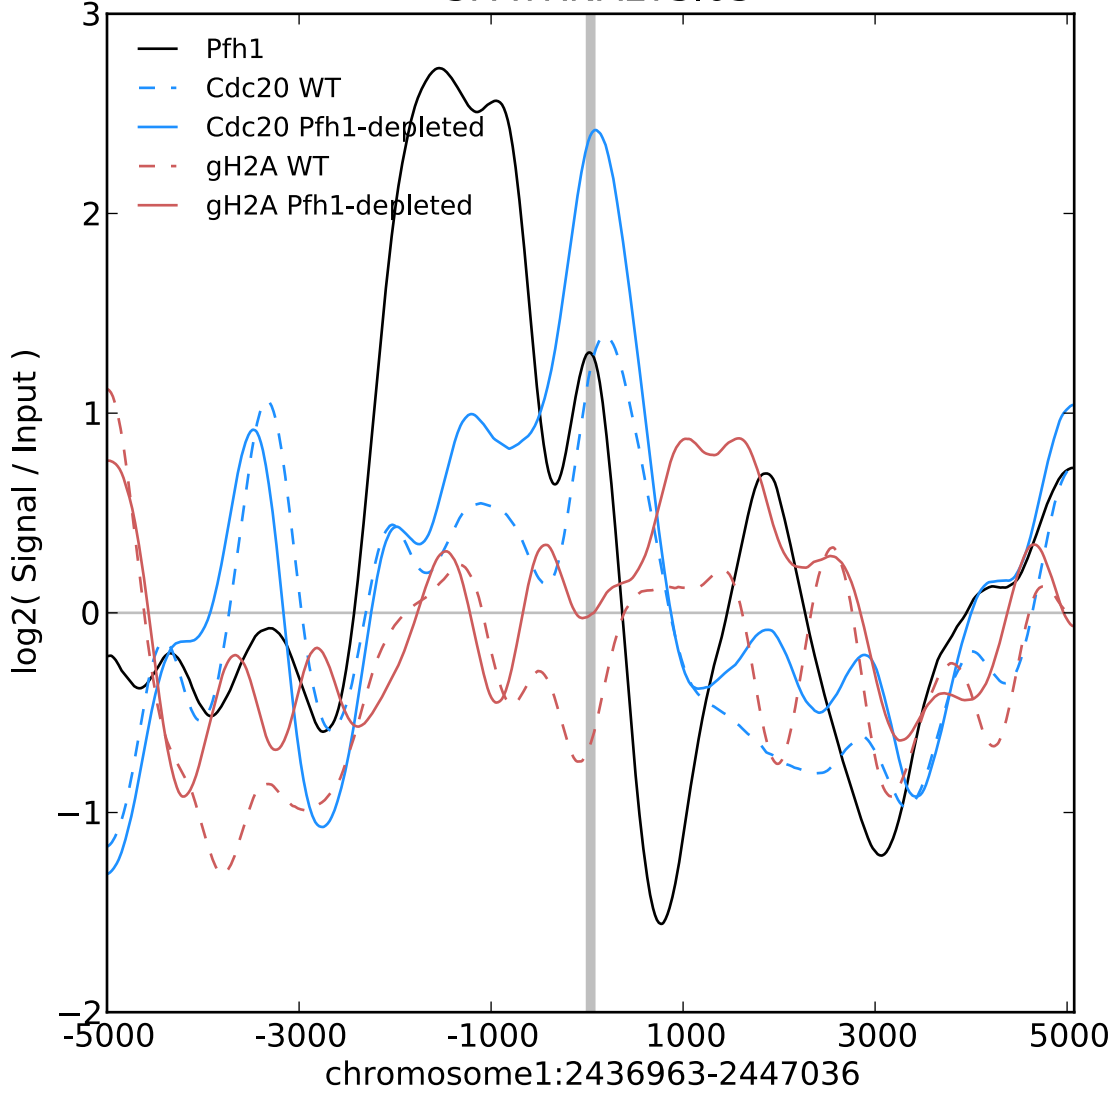

# SPATRANALYS.04

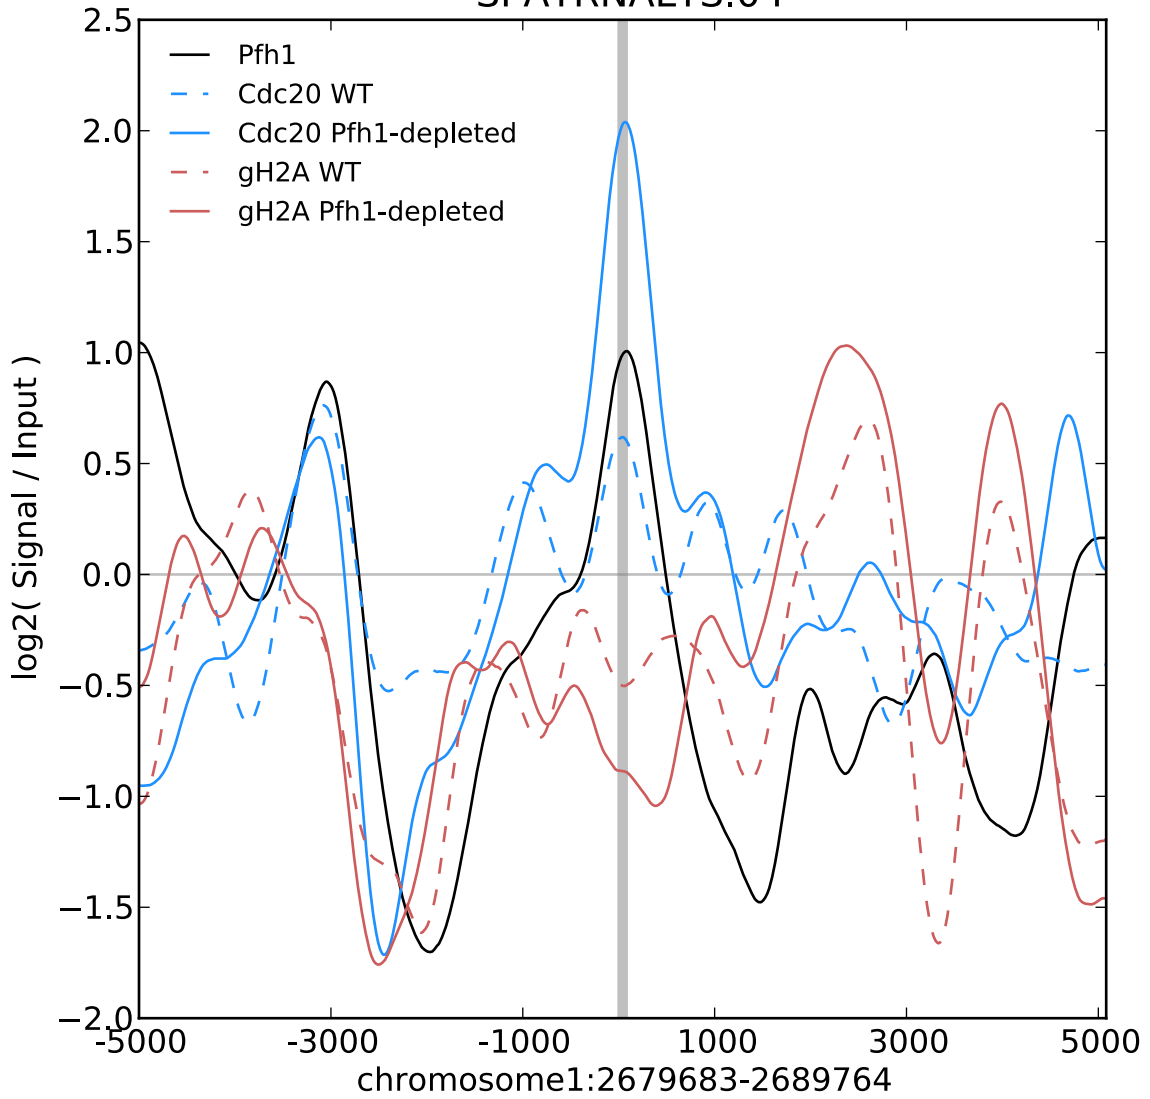

# SPATRANALYS.05

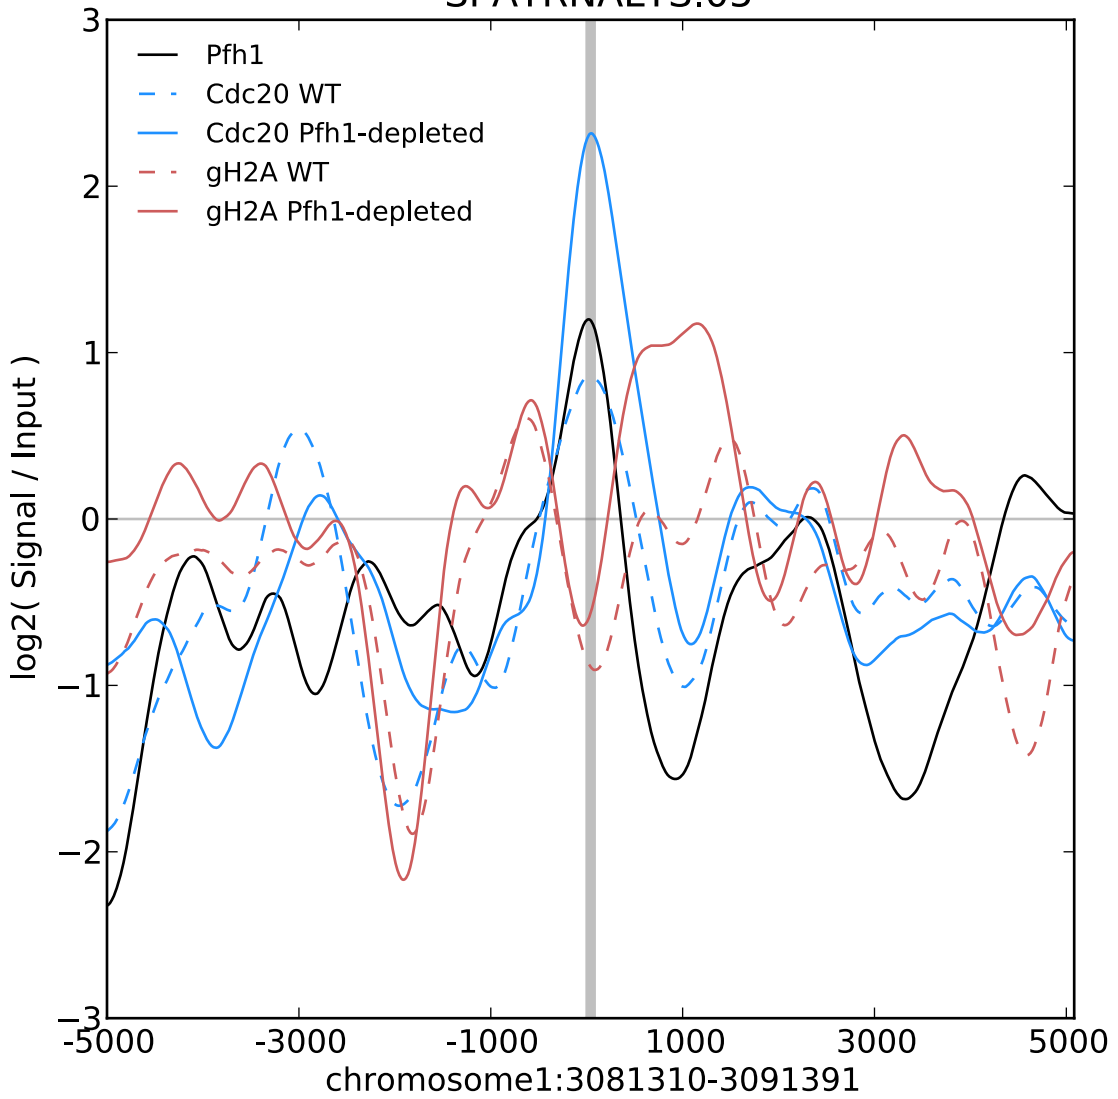

# SPATRNAMET.01

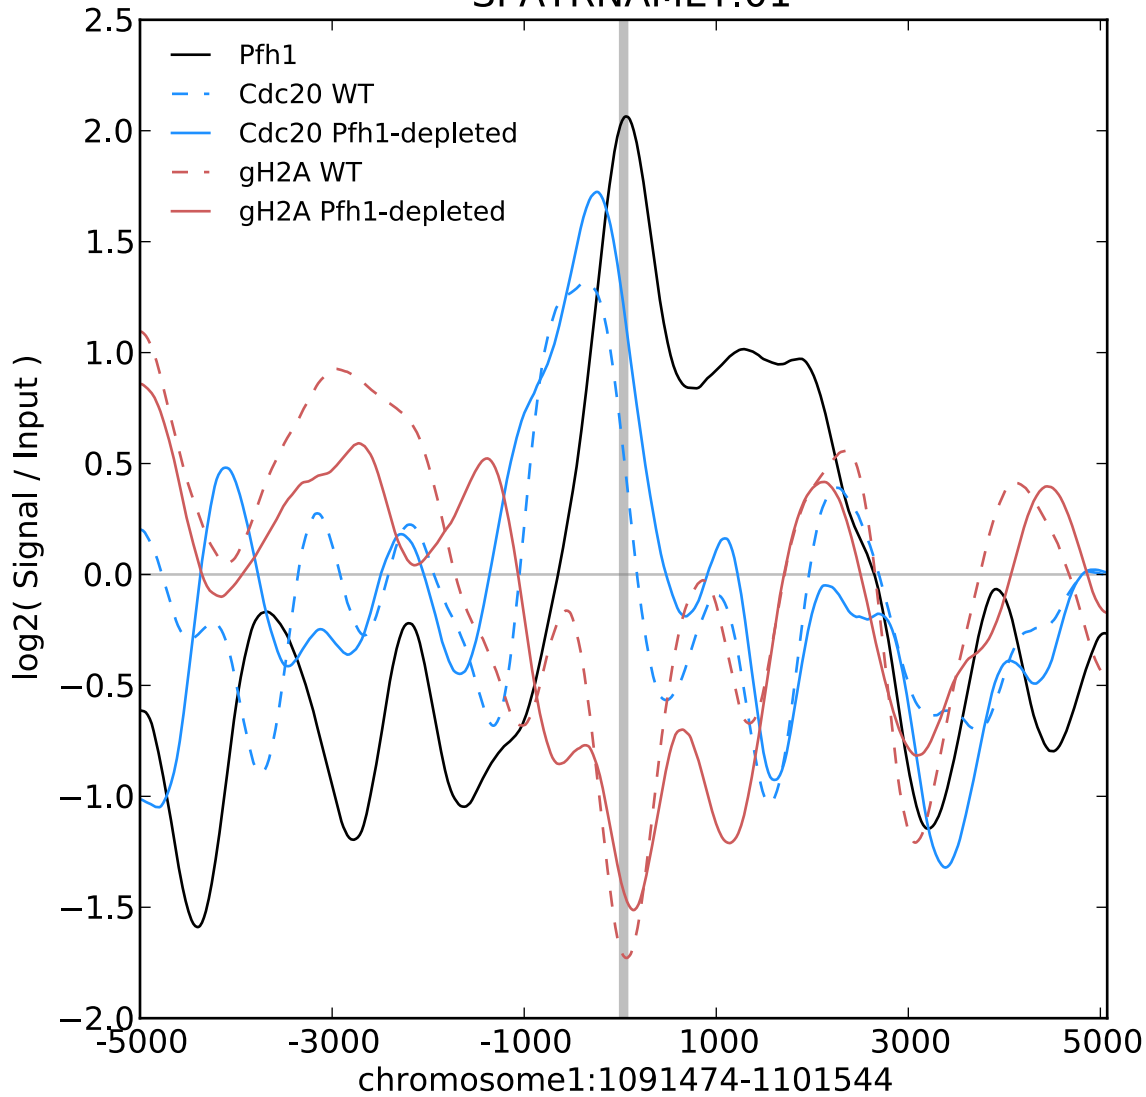

# SPATRNAMET.02

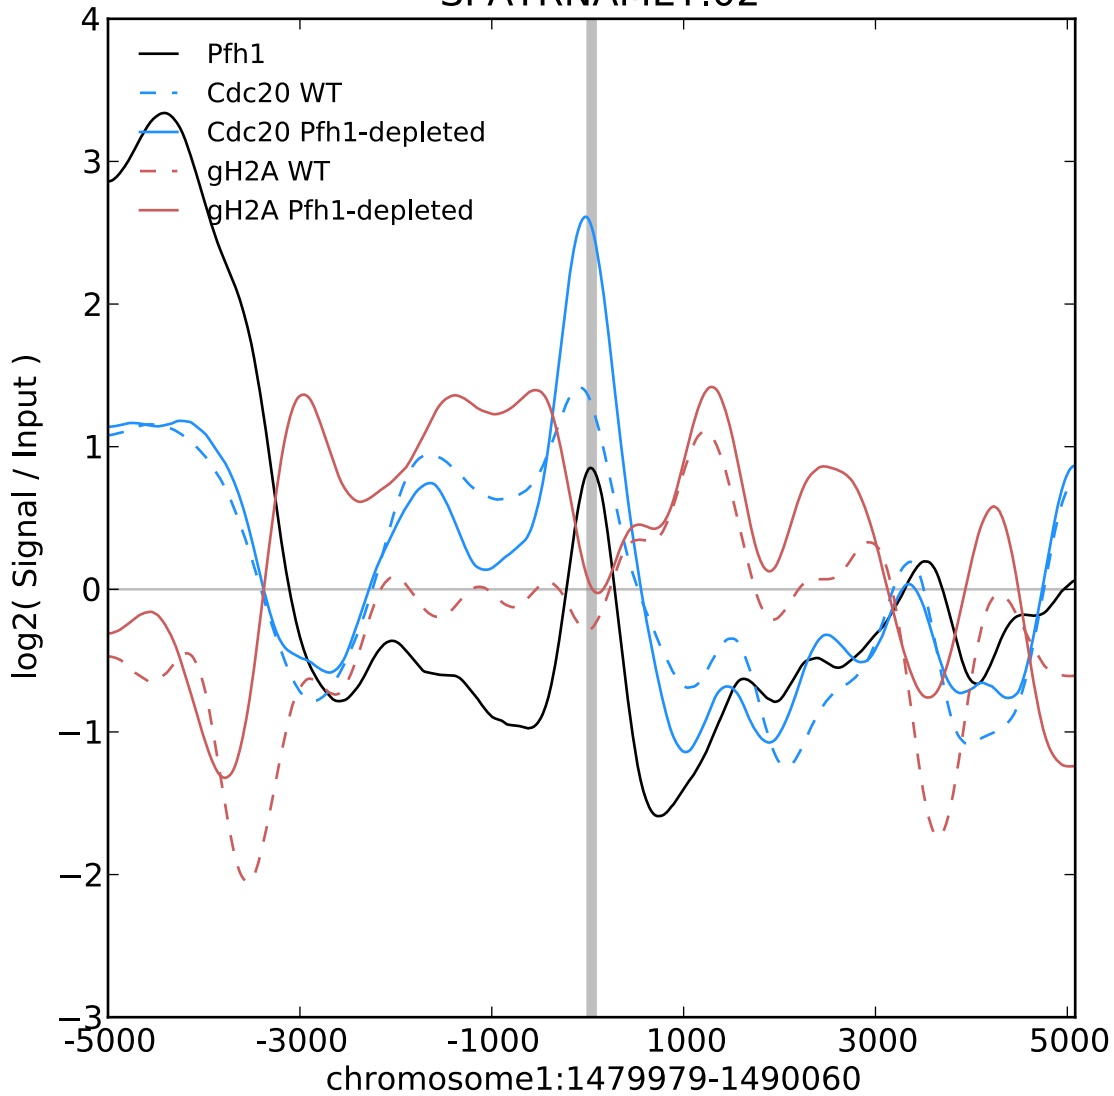

# SPATRNAMET.03

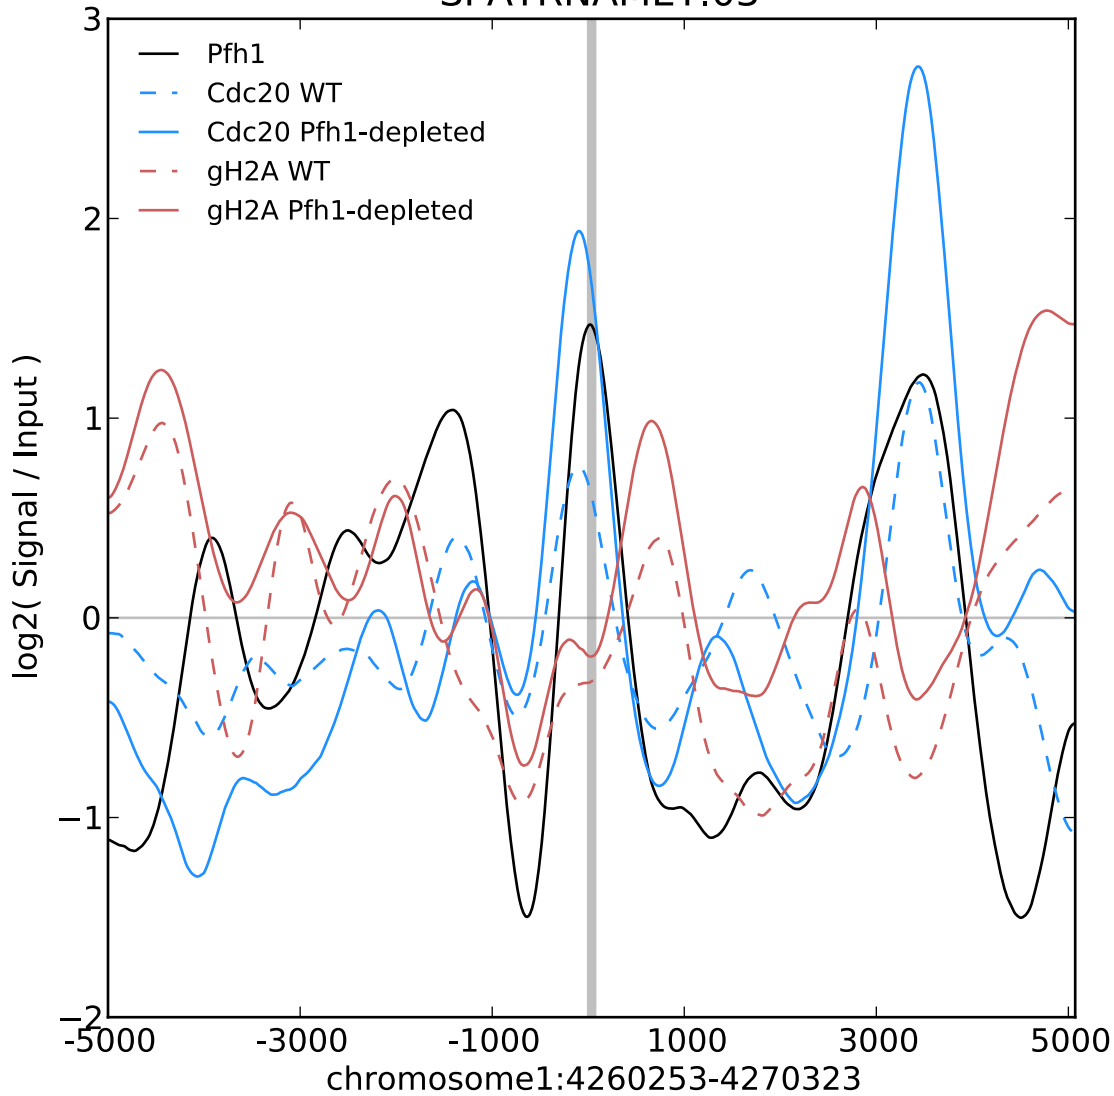



# SPATRNPAPHE.01

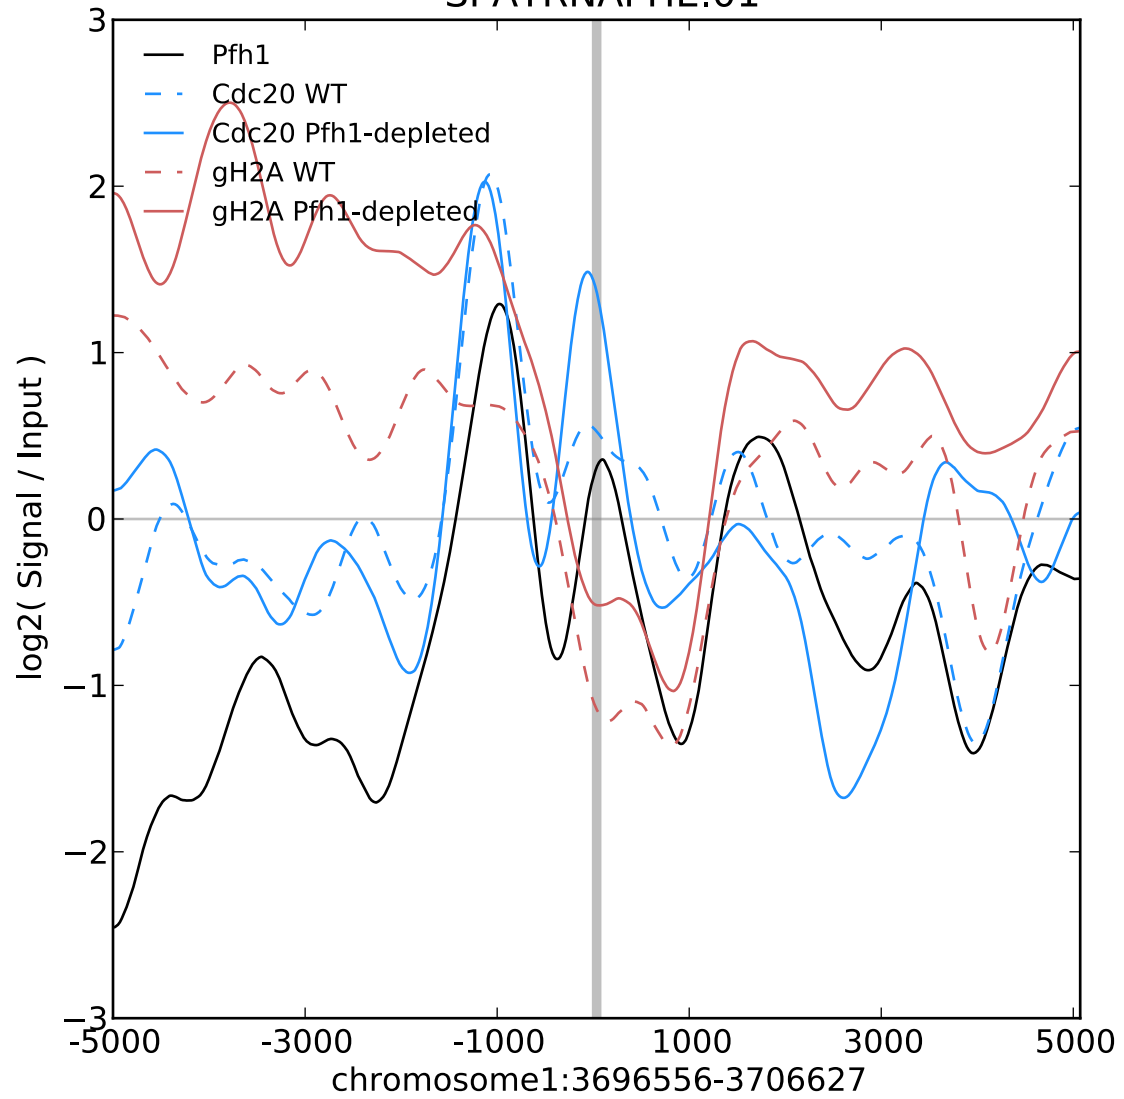

# SPATRNPAPHE.02

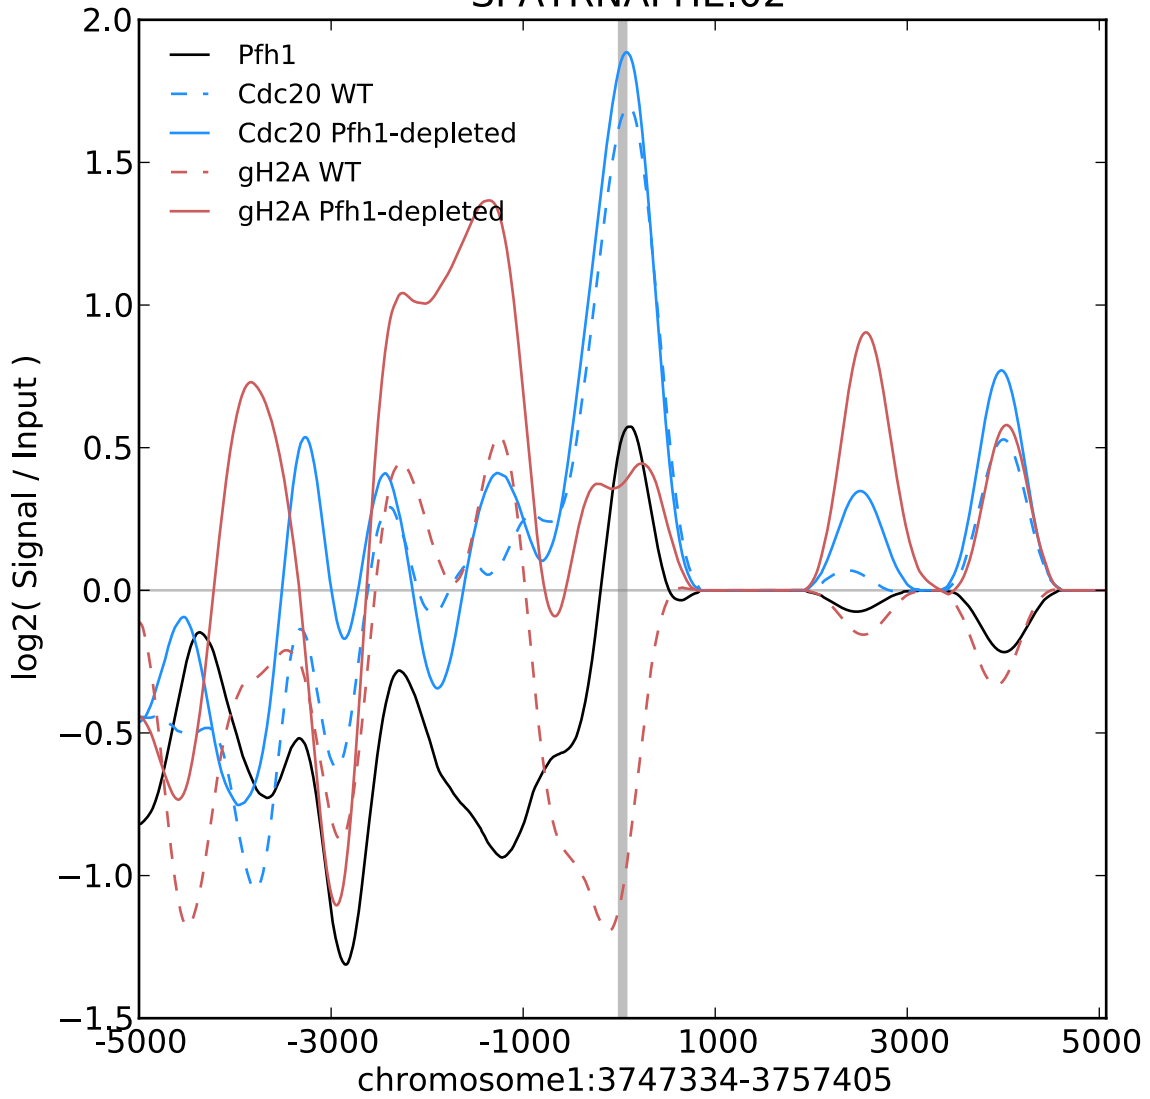

# SPATR NAPRO.01

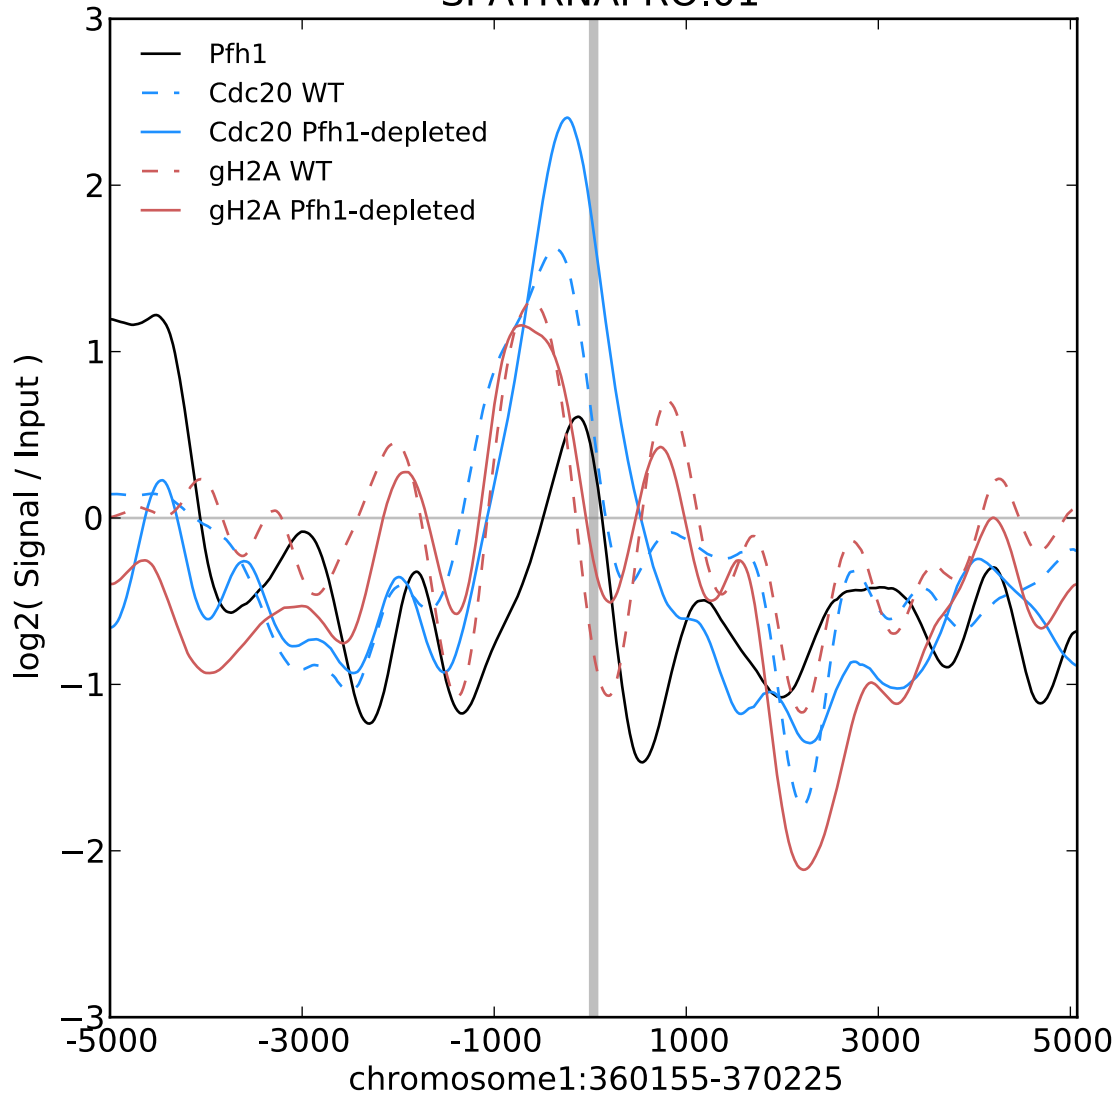

# SPATR NAPRO.02

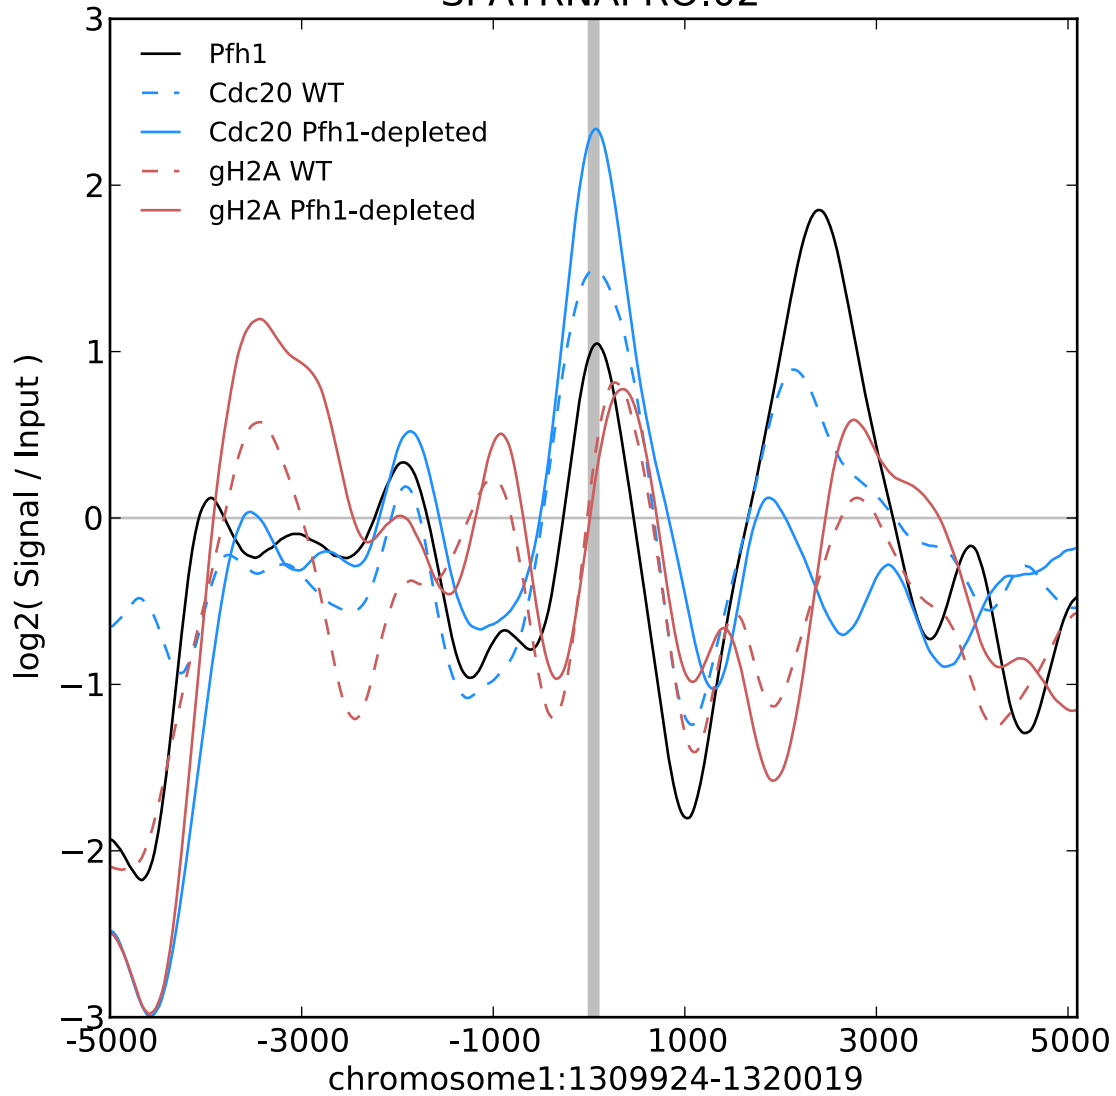

# SPATR NAPRO.03

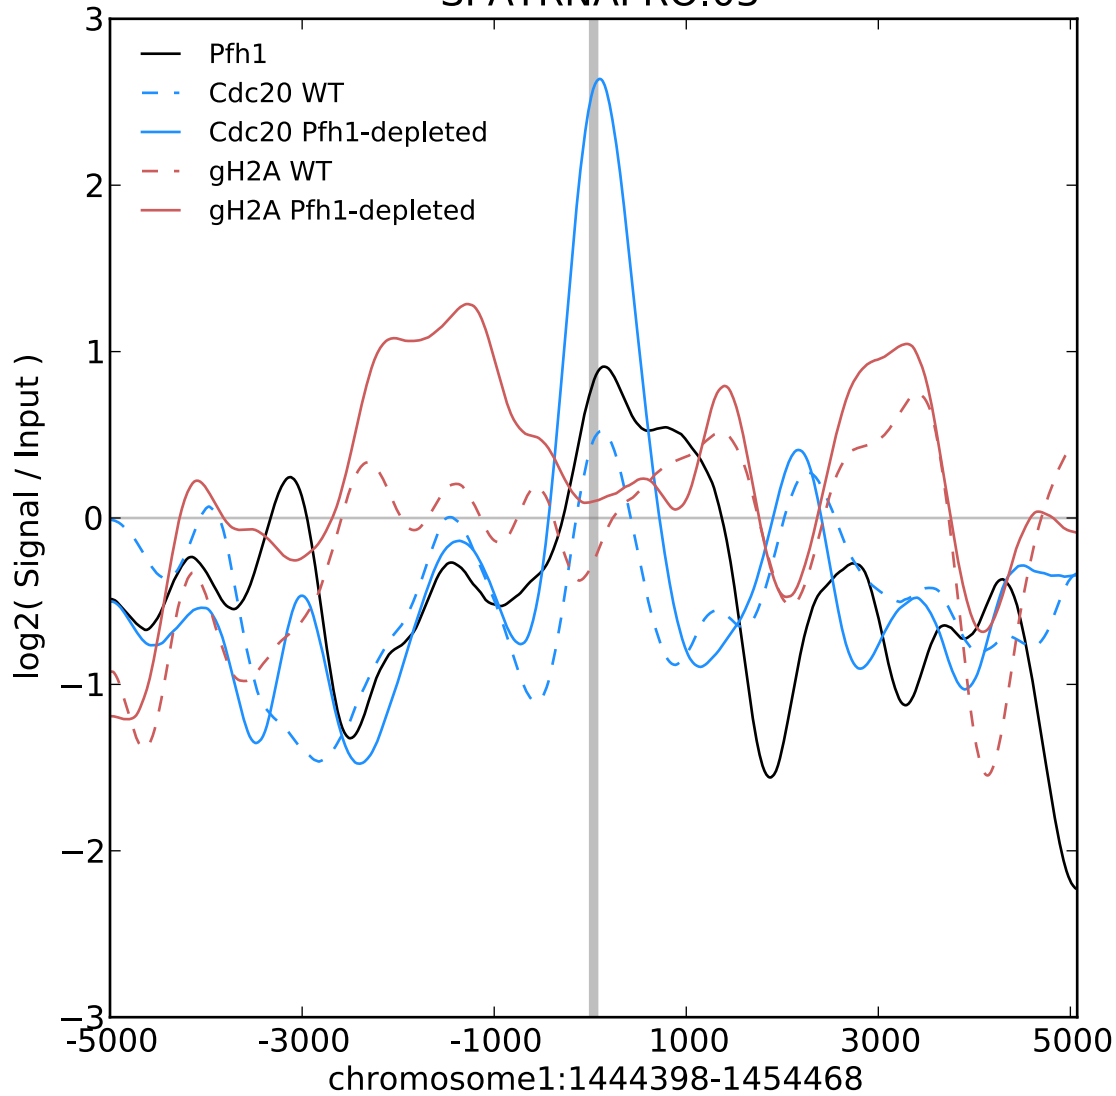

## SPATRNASER.01

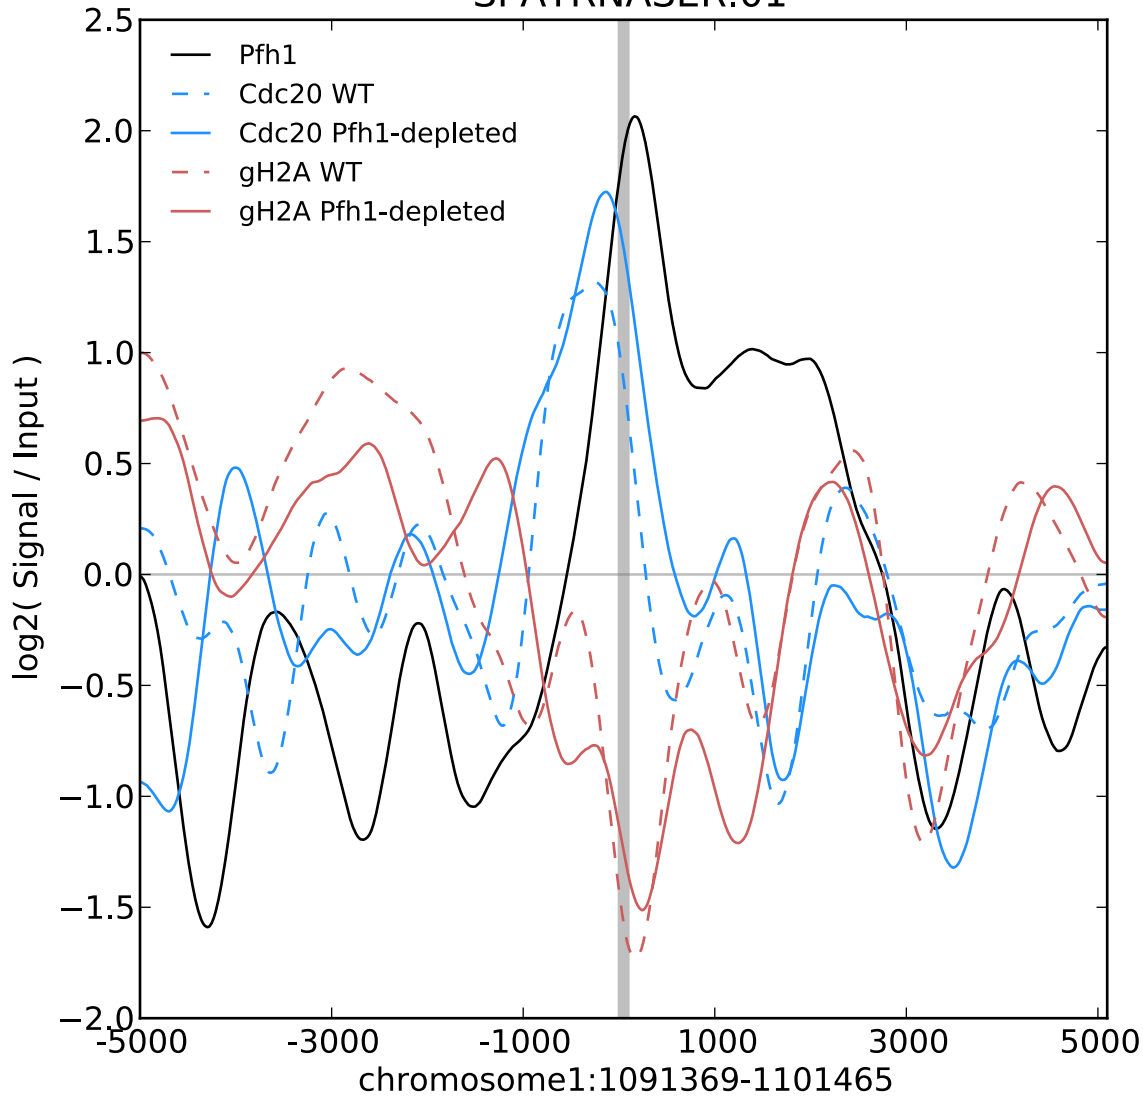

# SPATRNASER.02

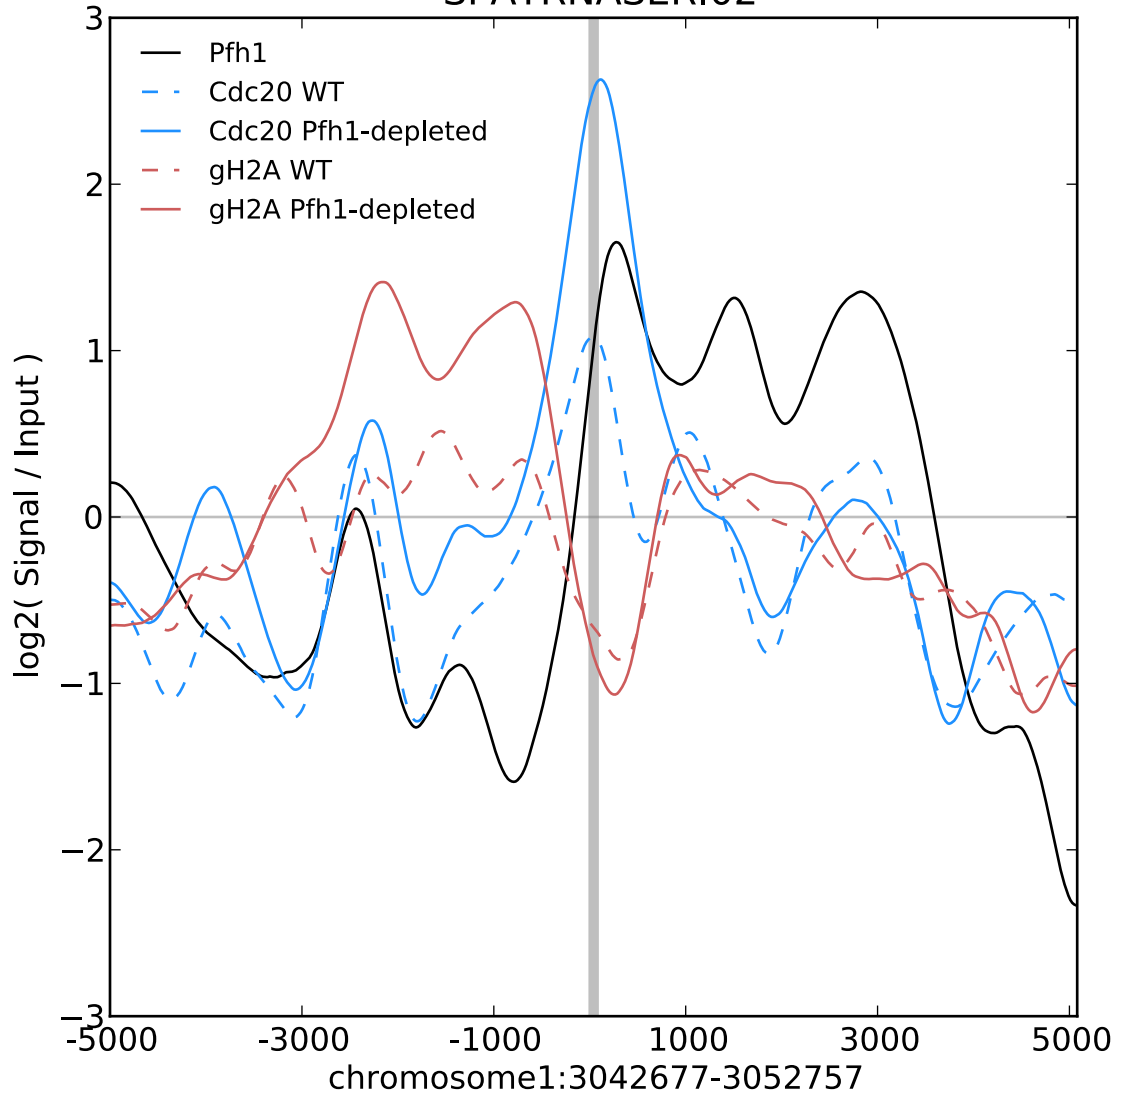

# SPATRNASER.03

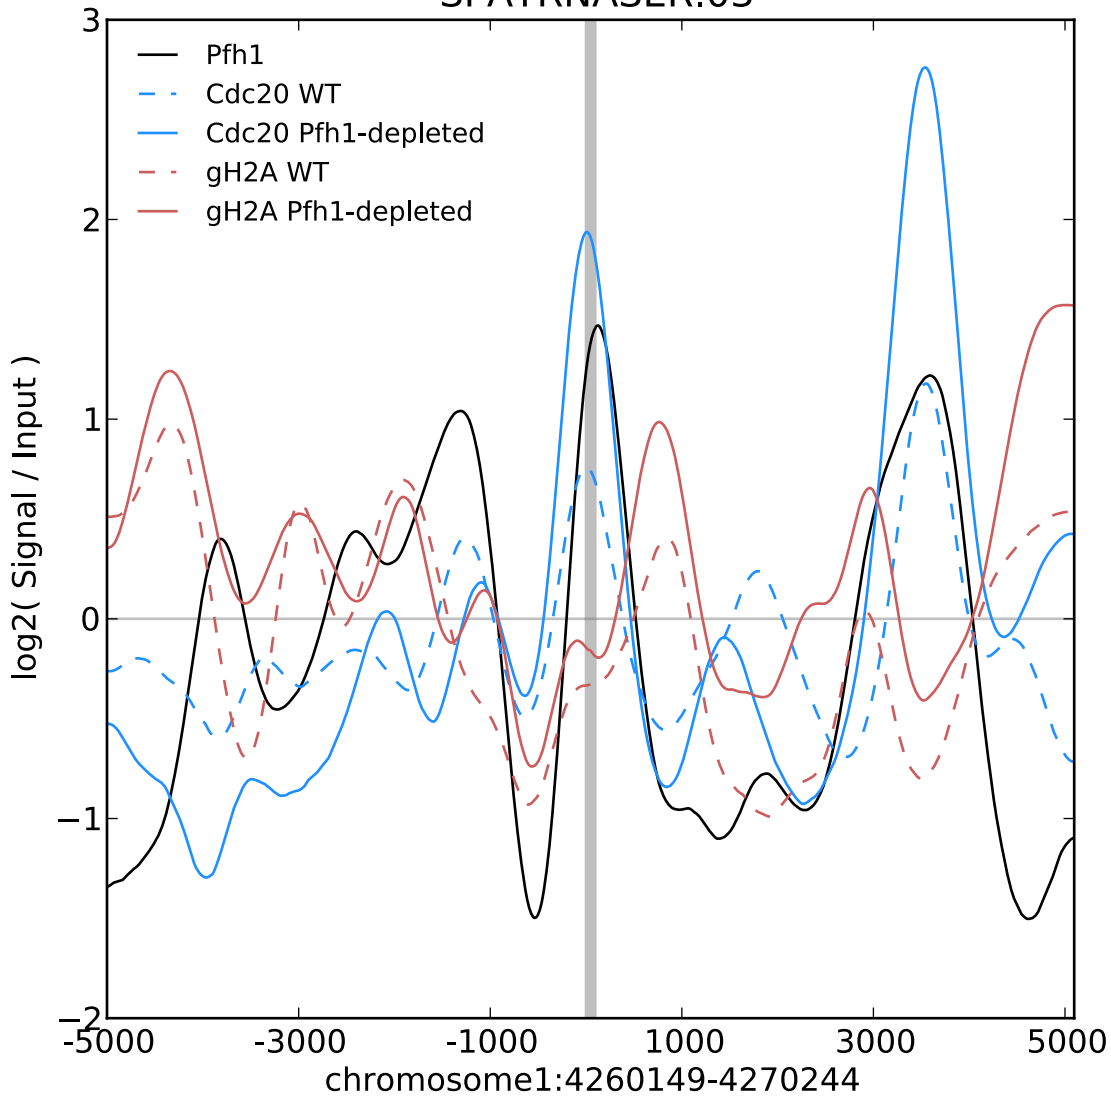



# SPATRNASER.04

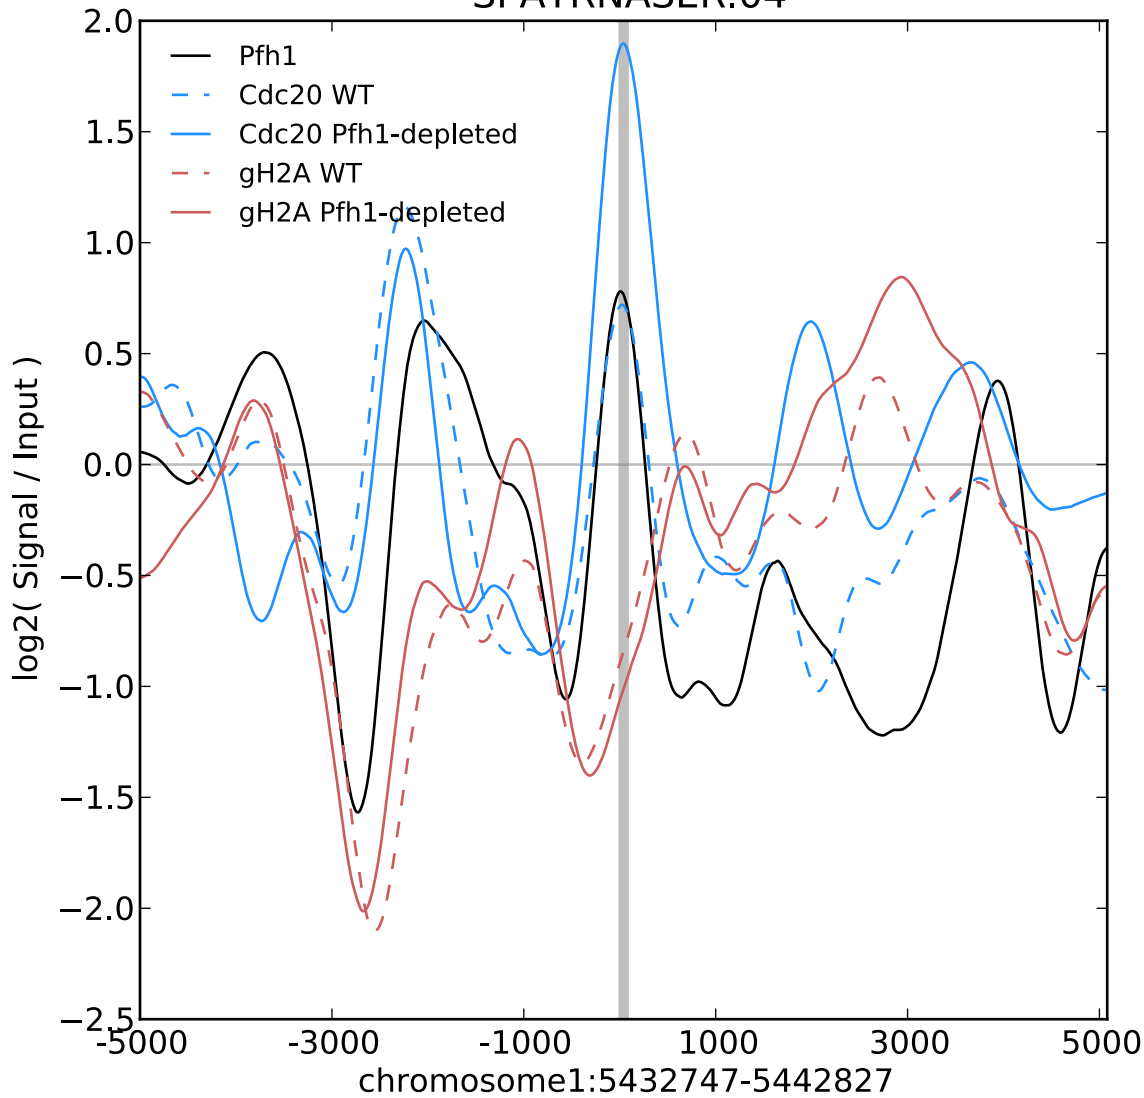

# SPATR.NATHR.01

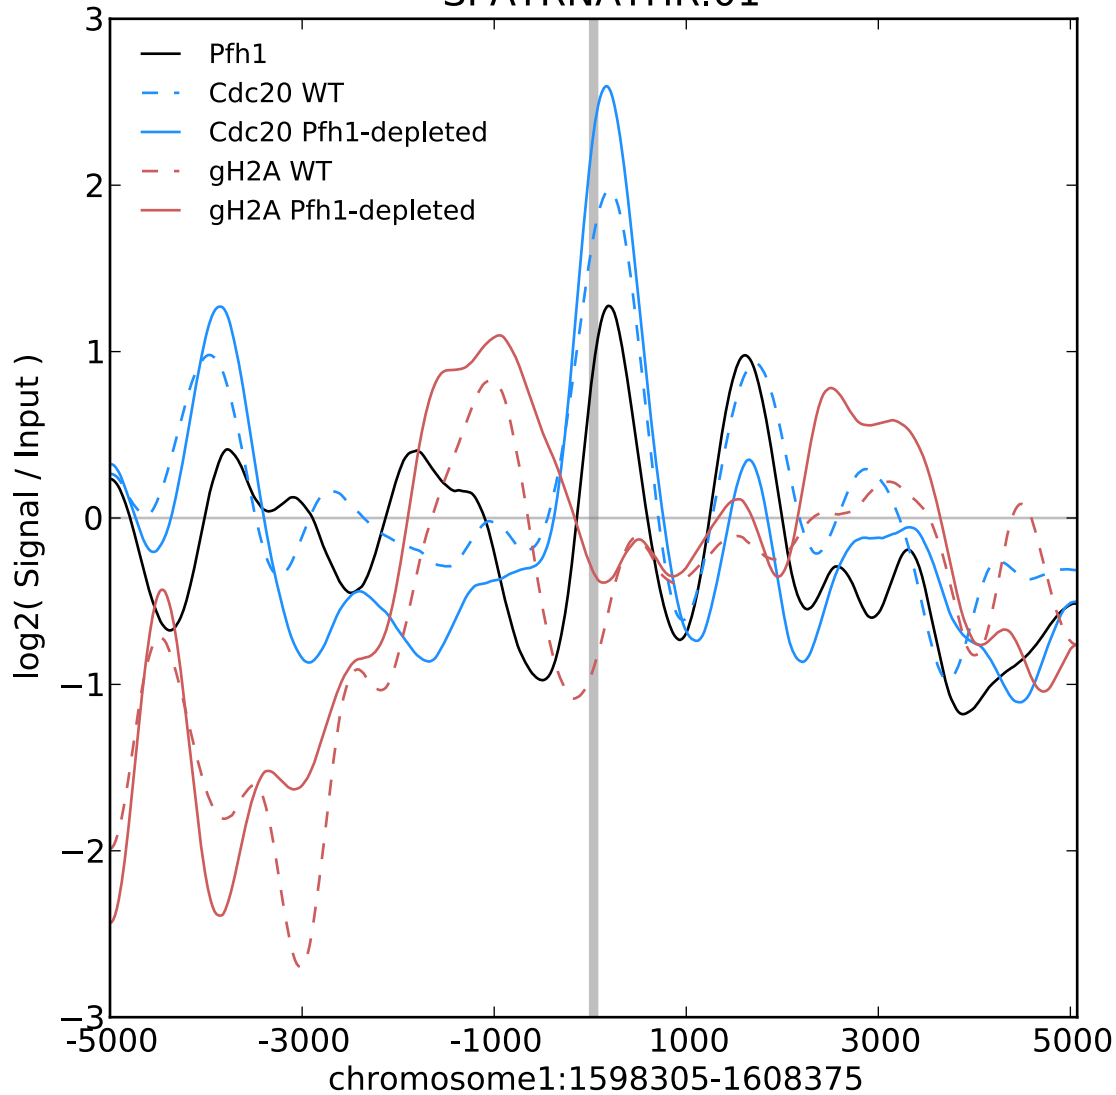

# SPATR.NATHR.02

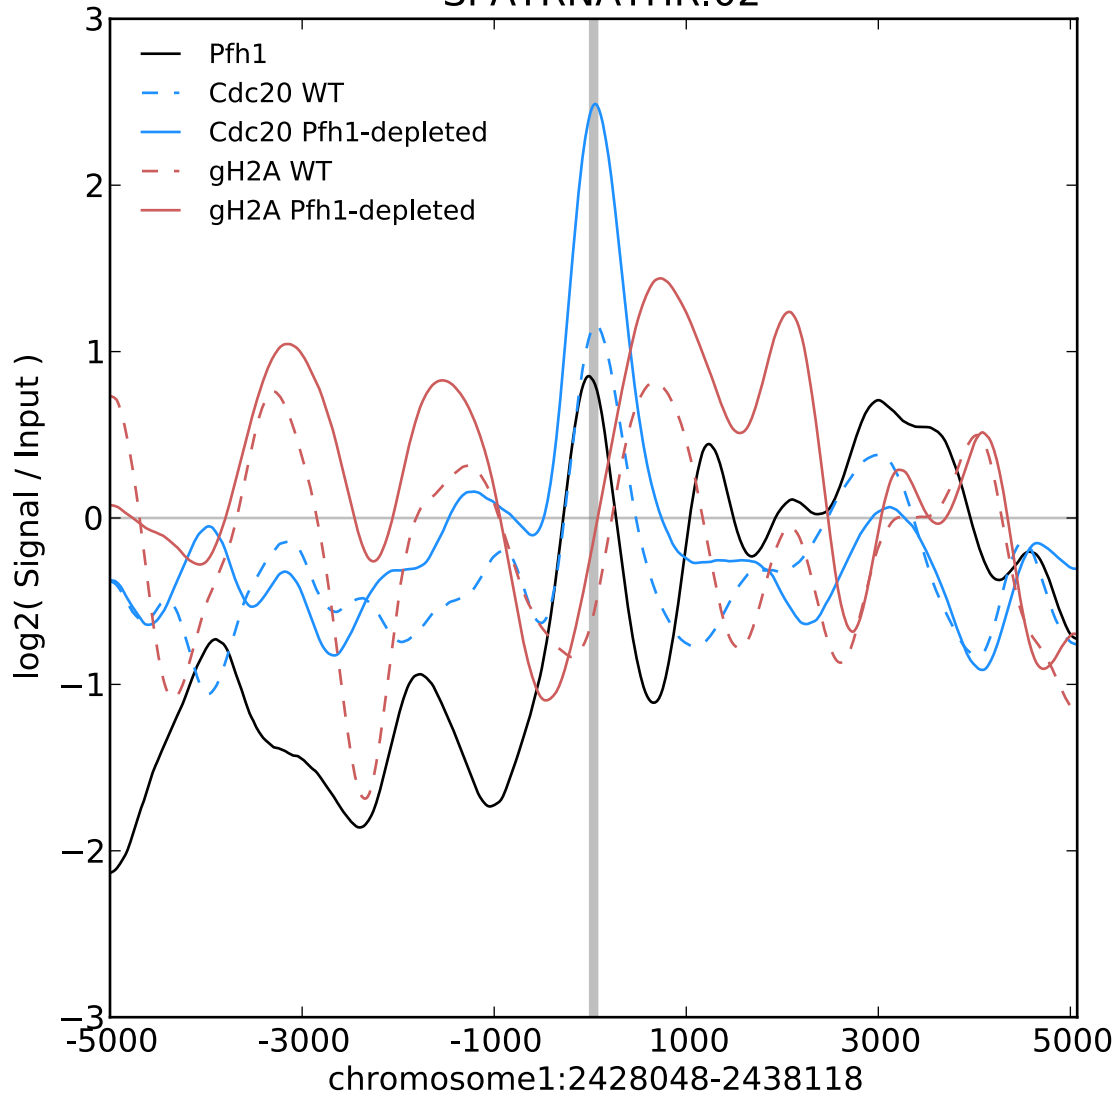

# SPATRNRATHR.03

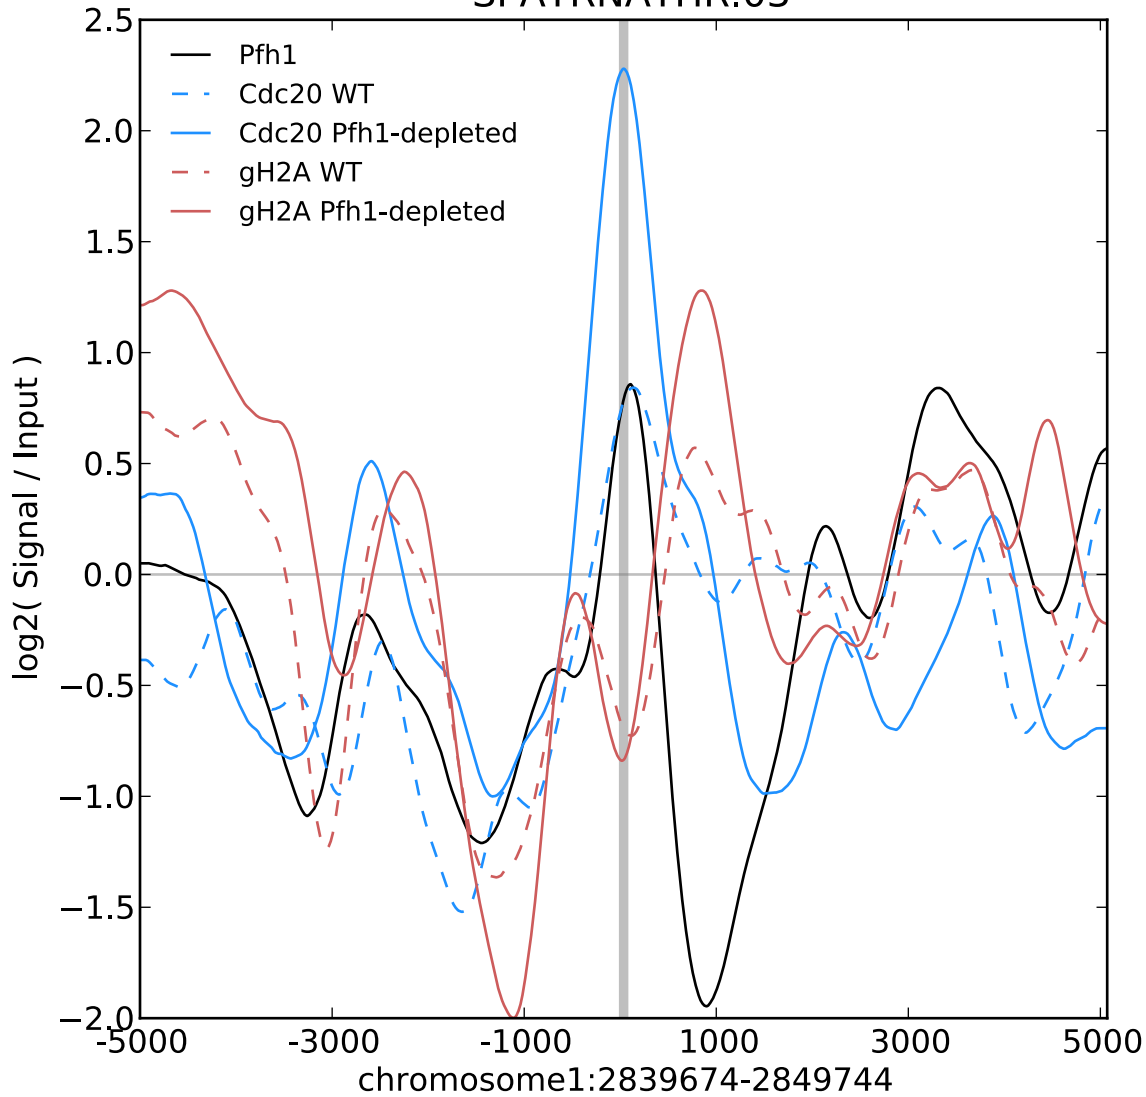

# SPATRNRATHR.04

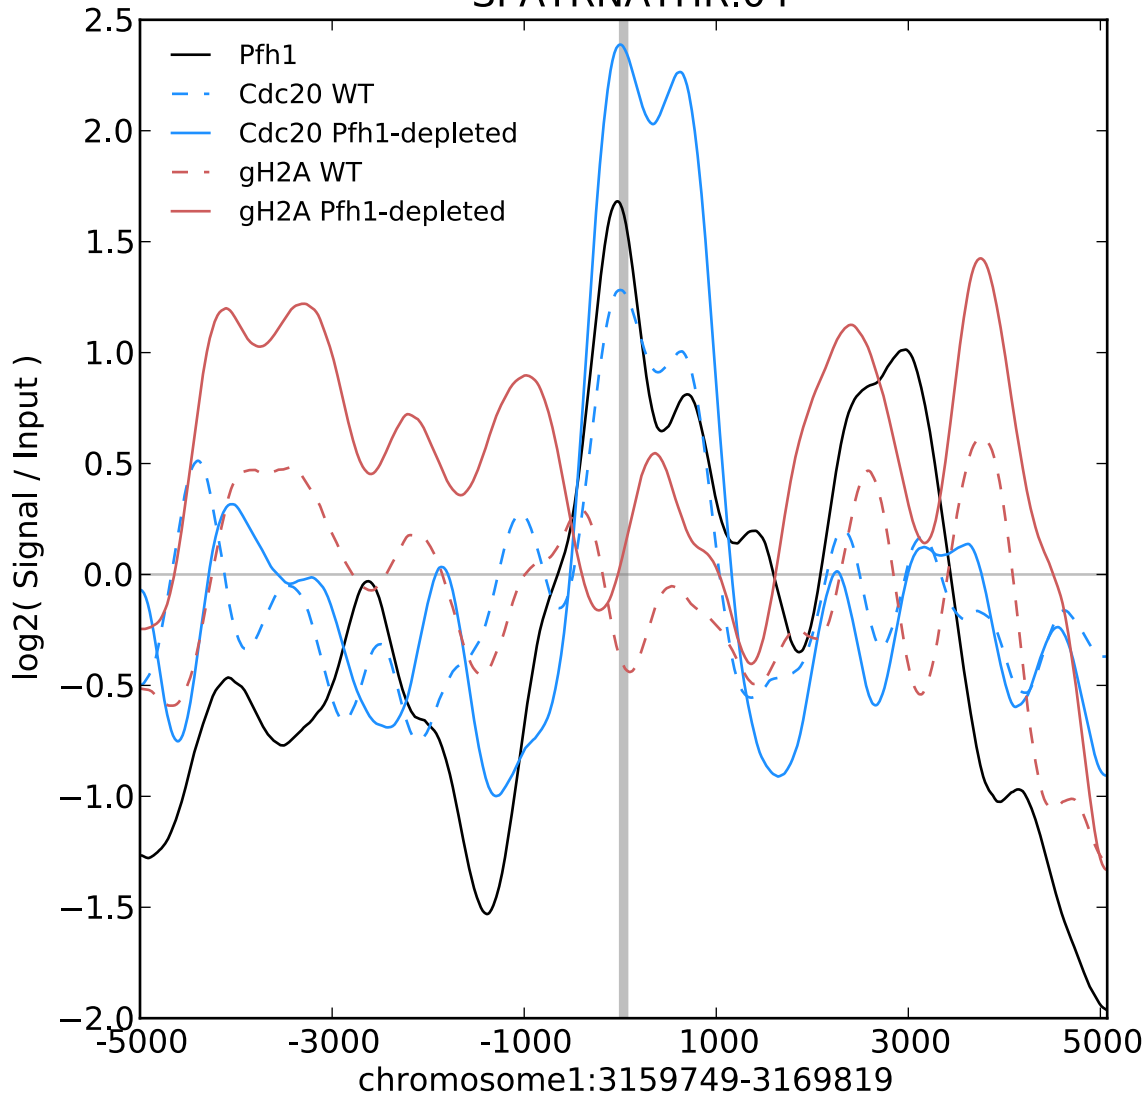

# SPATR.NATHR.05

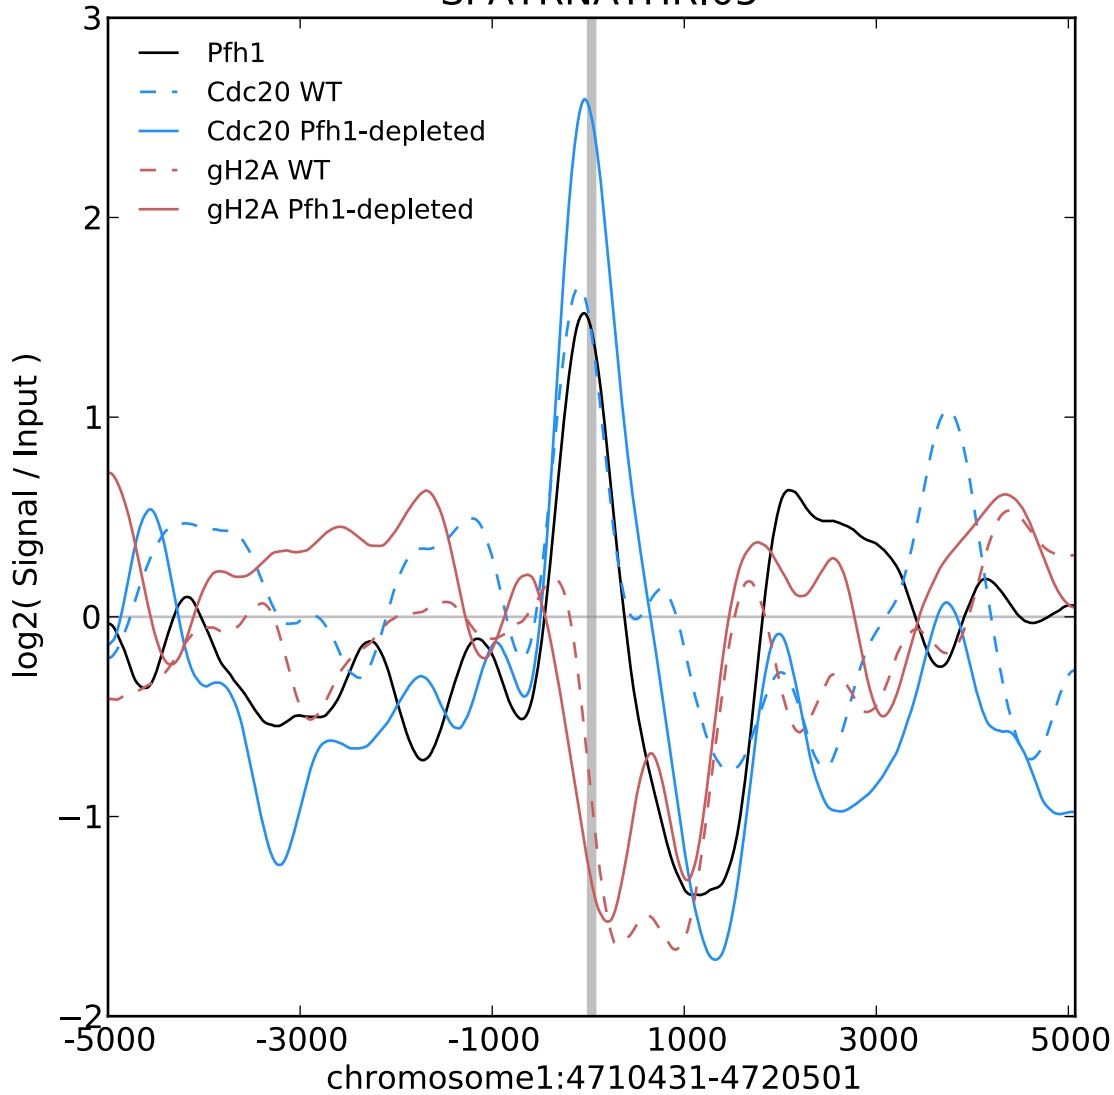

# SPATR NATRP.01

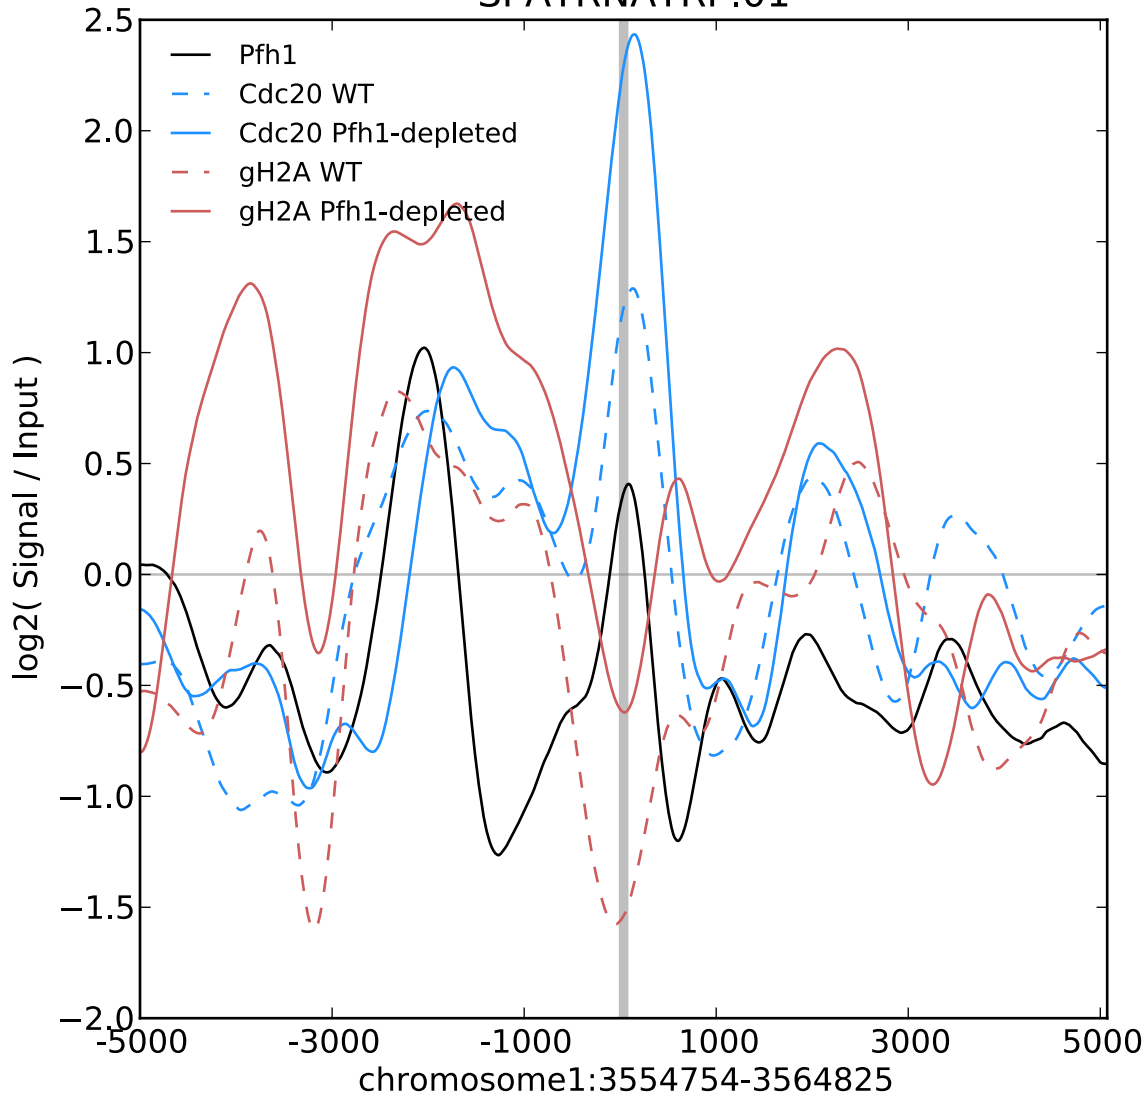

# SPATR NATYR.01

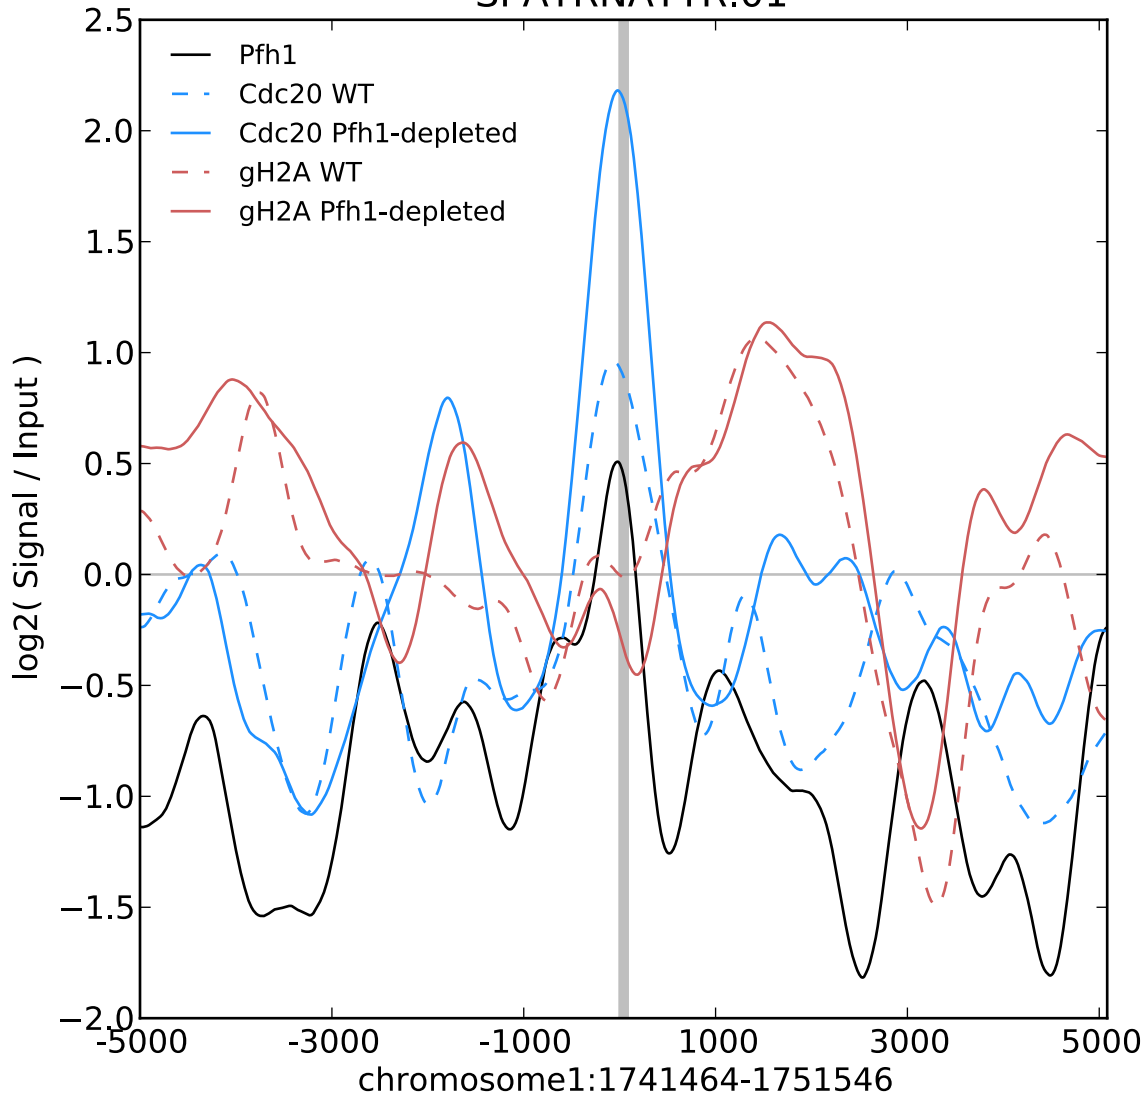



# SPATRNAVAL.01

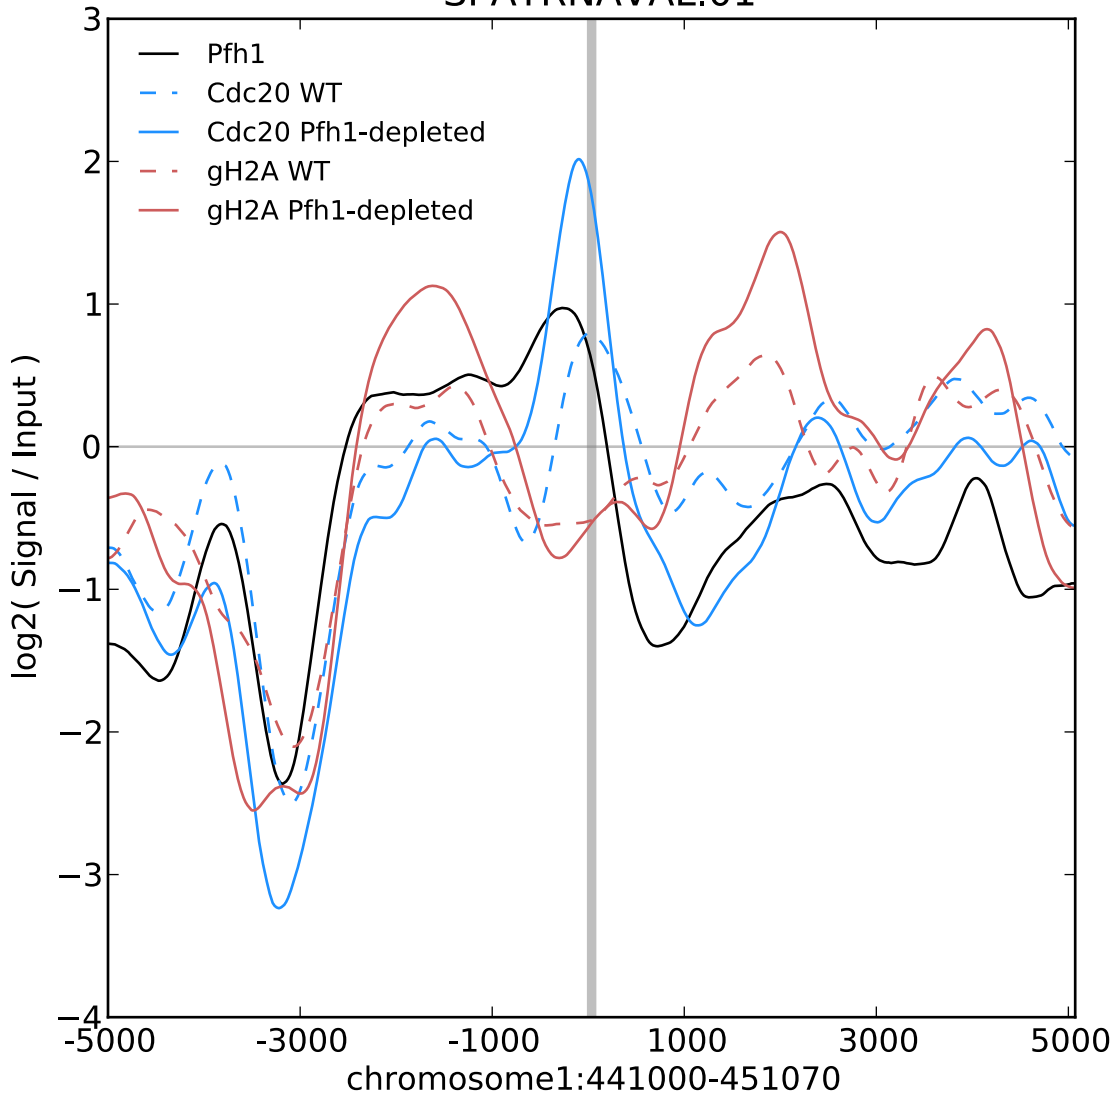

# SPATRNAVAL.02

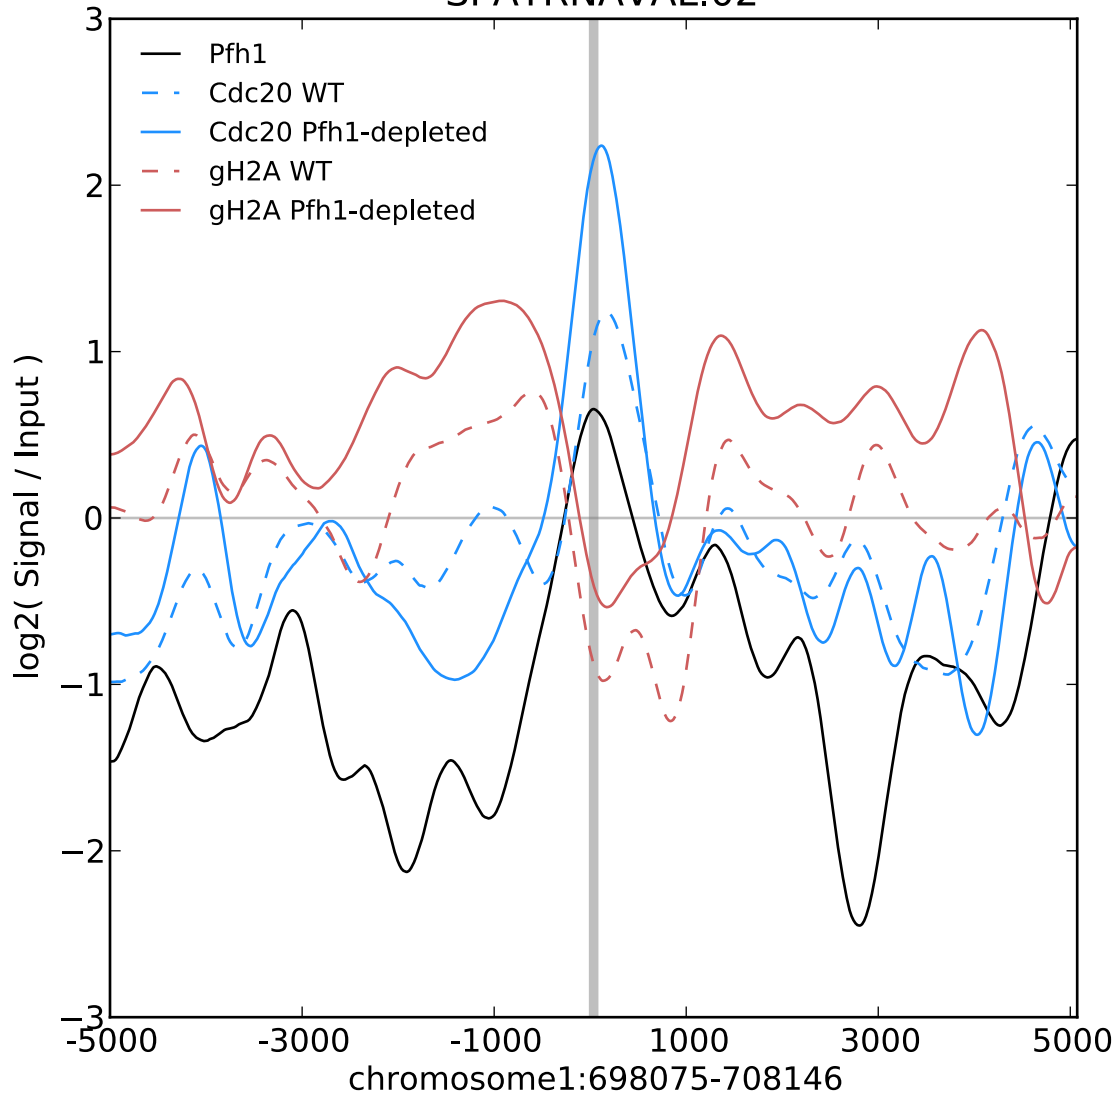

# SPATRNAVAL.03

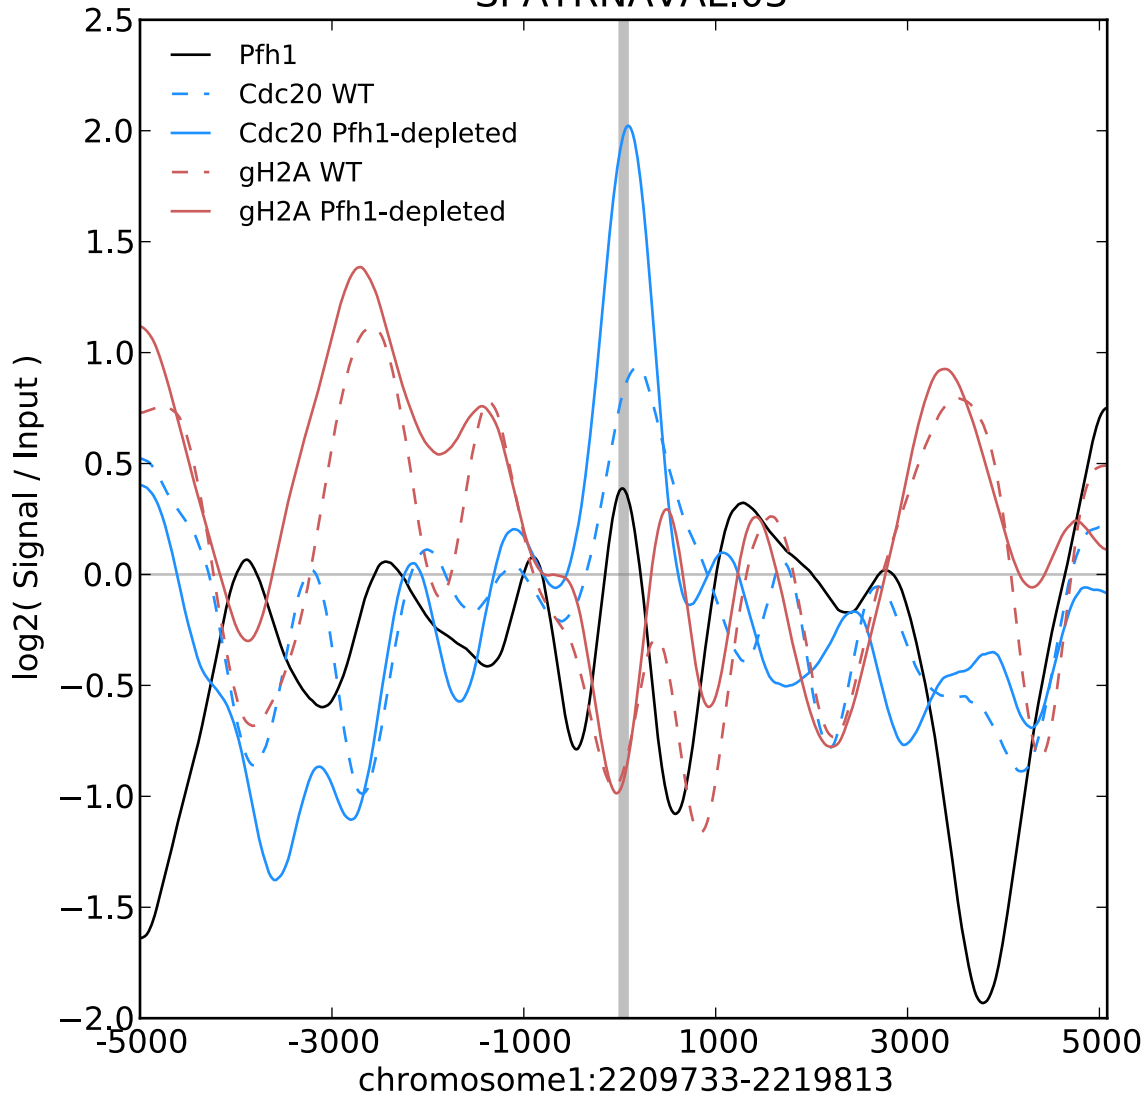

# SPATRNAVAL.04

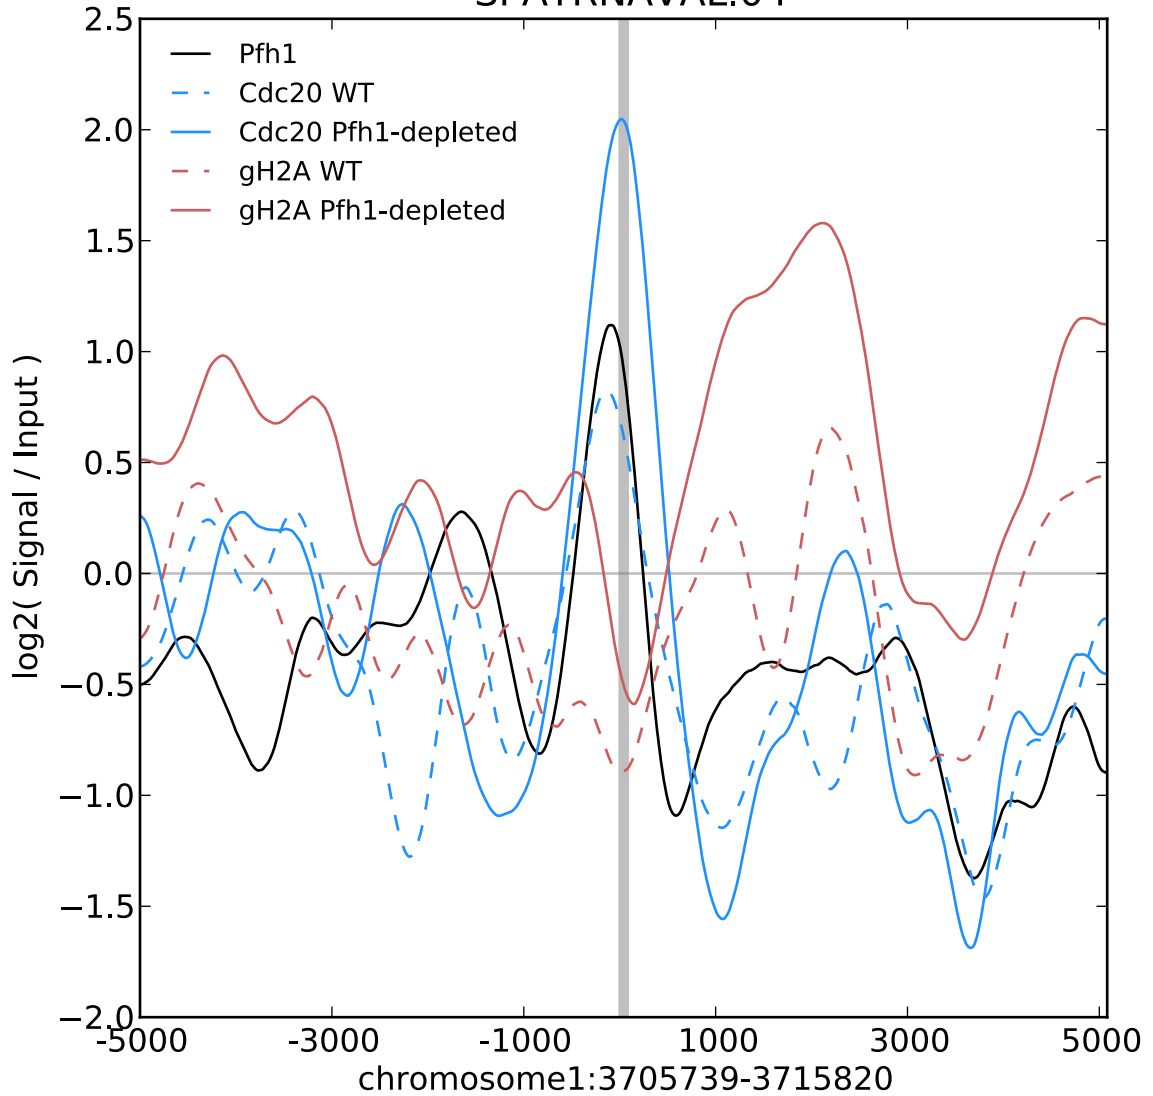

# SPBTRNAALA.07

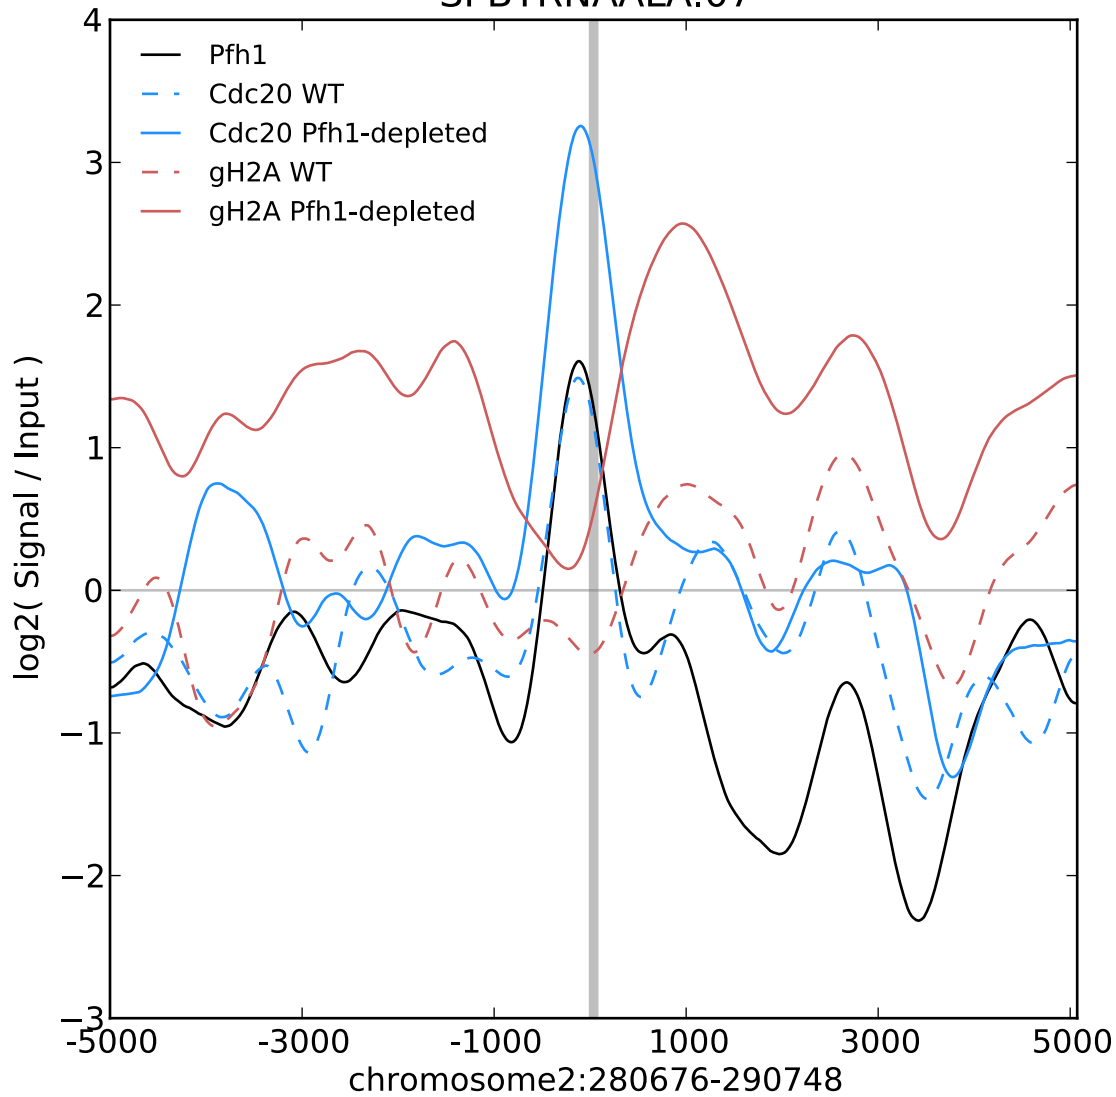

# SPBTRNAALA.08

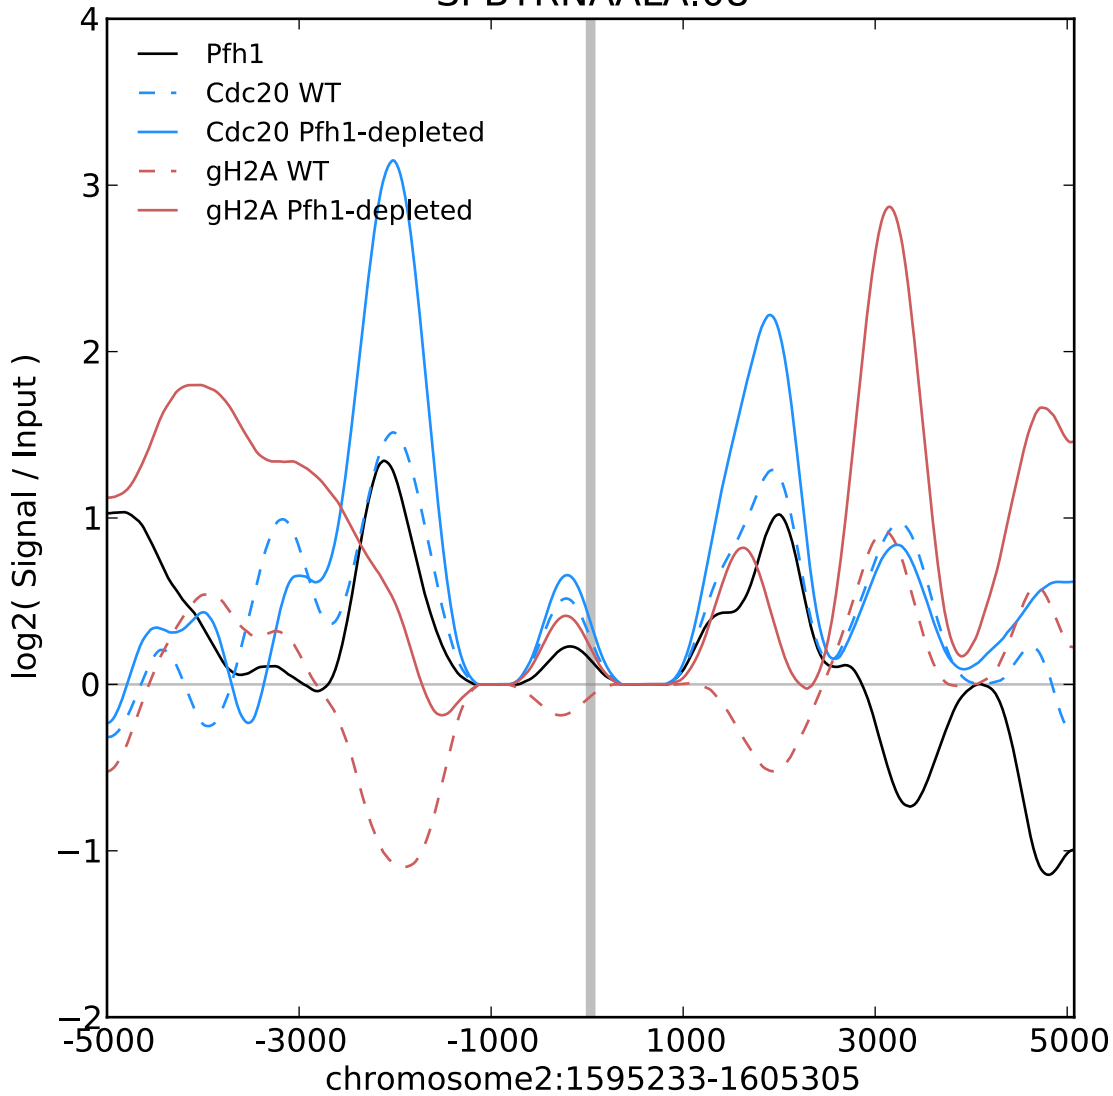

# SPBTRNAALA.09

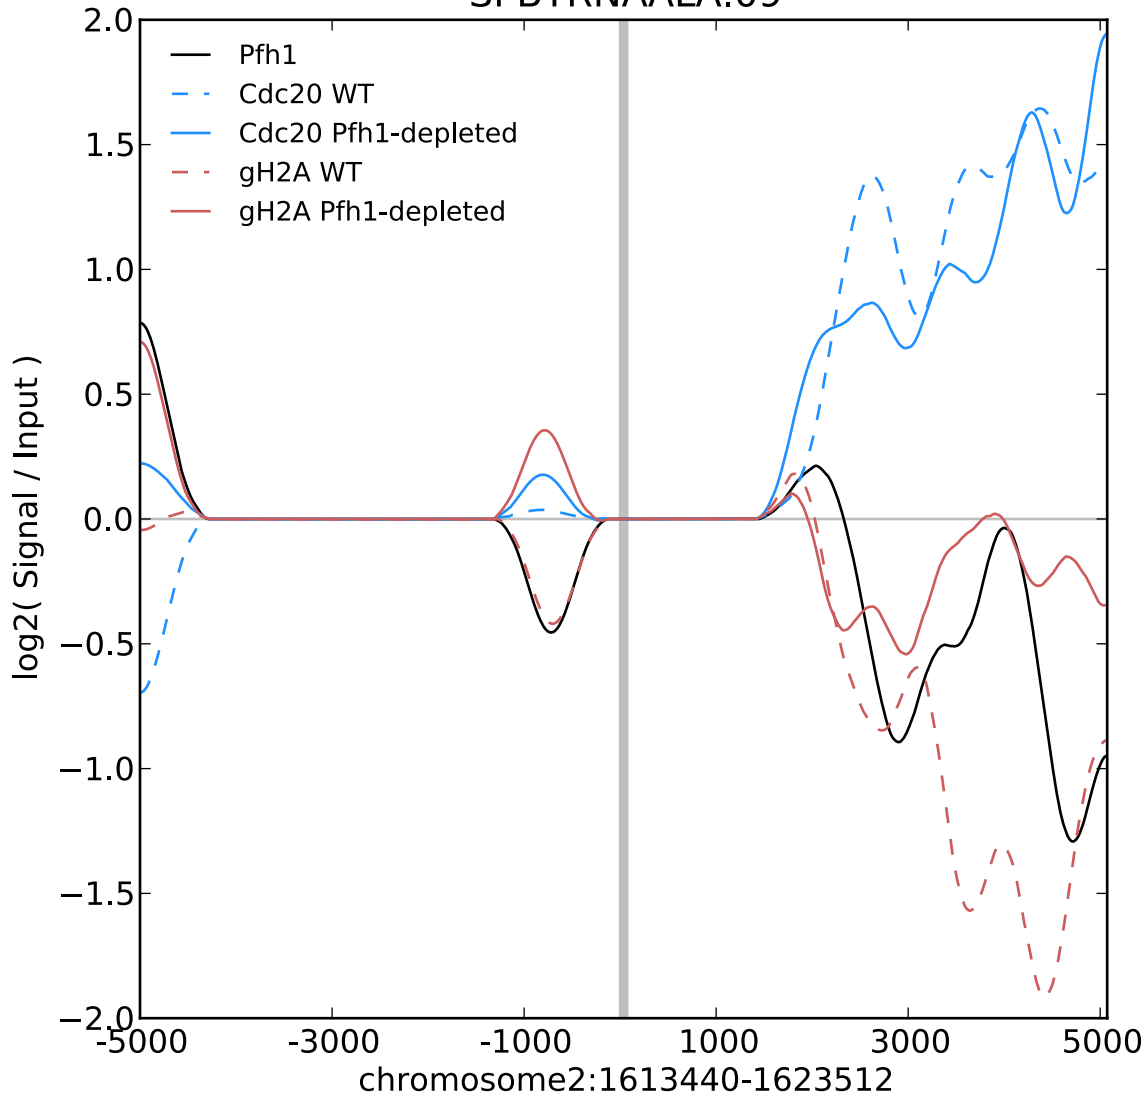

# SPBTRNAALA.10

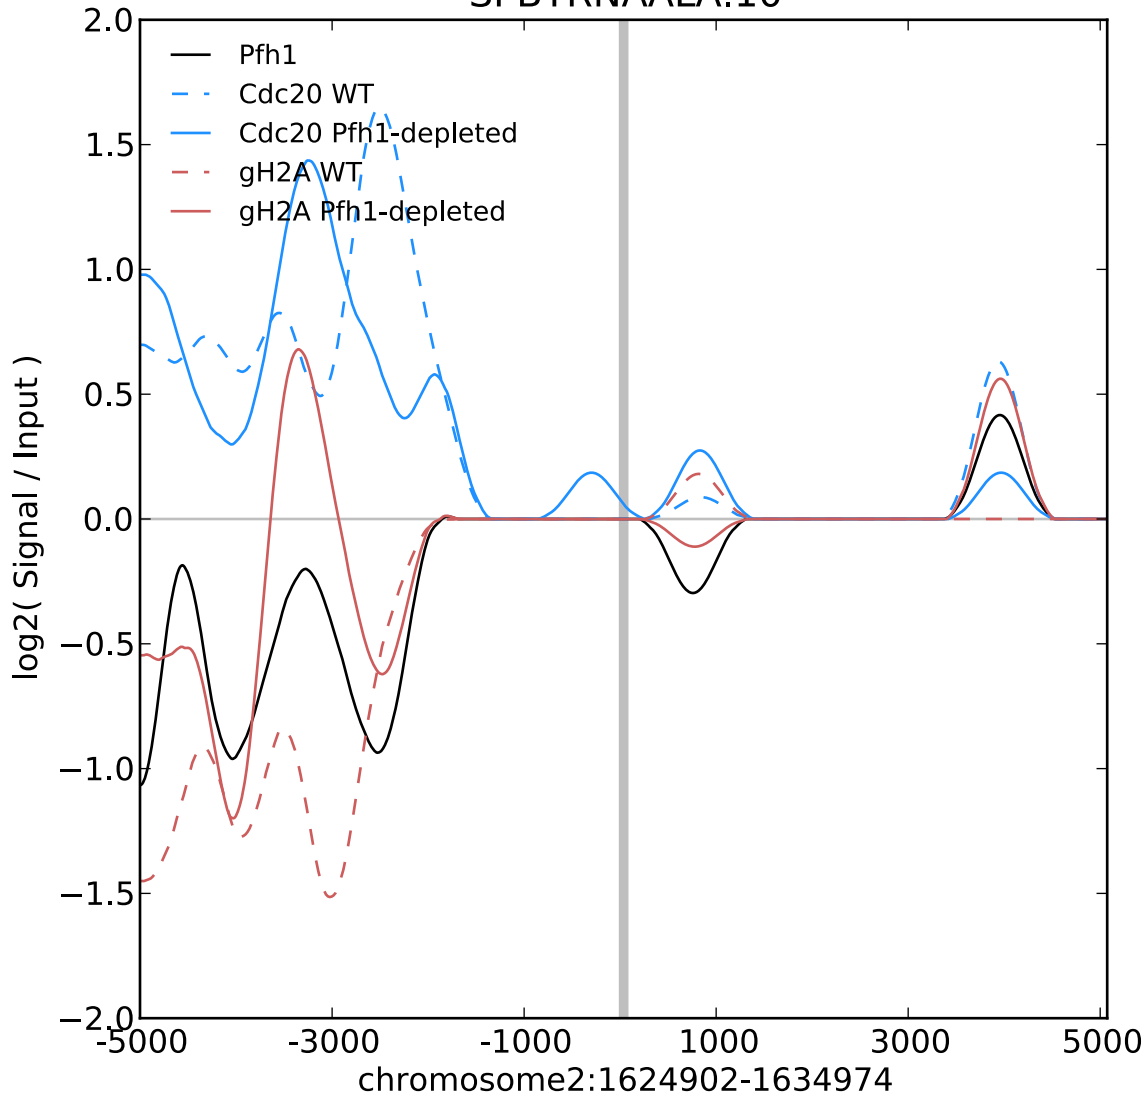



# SPBTRNAALA.11

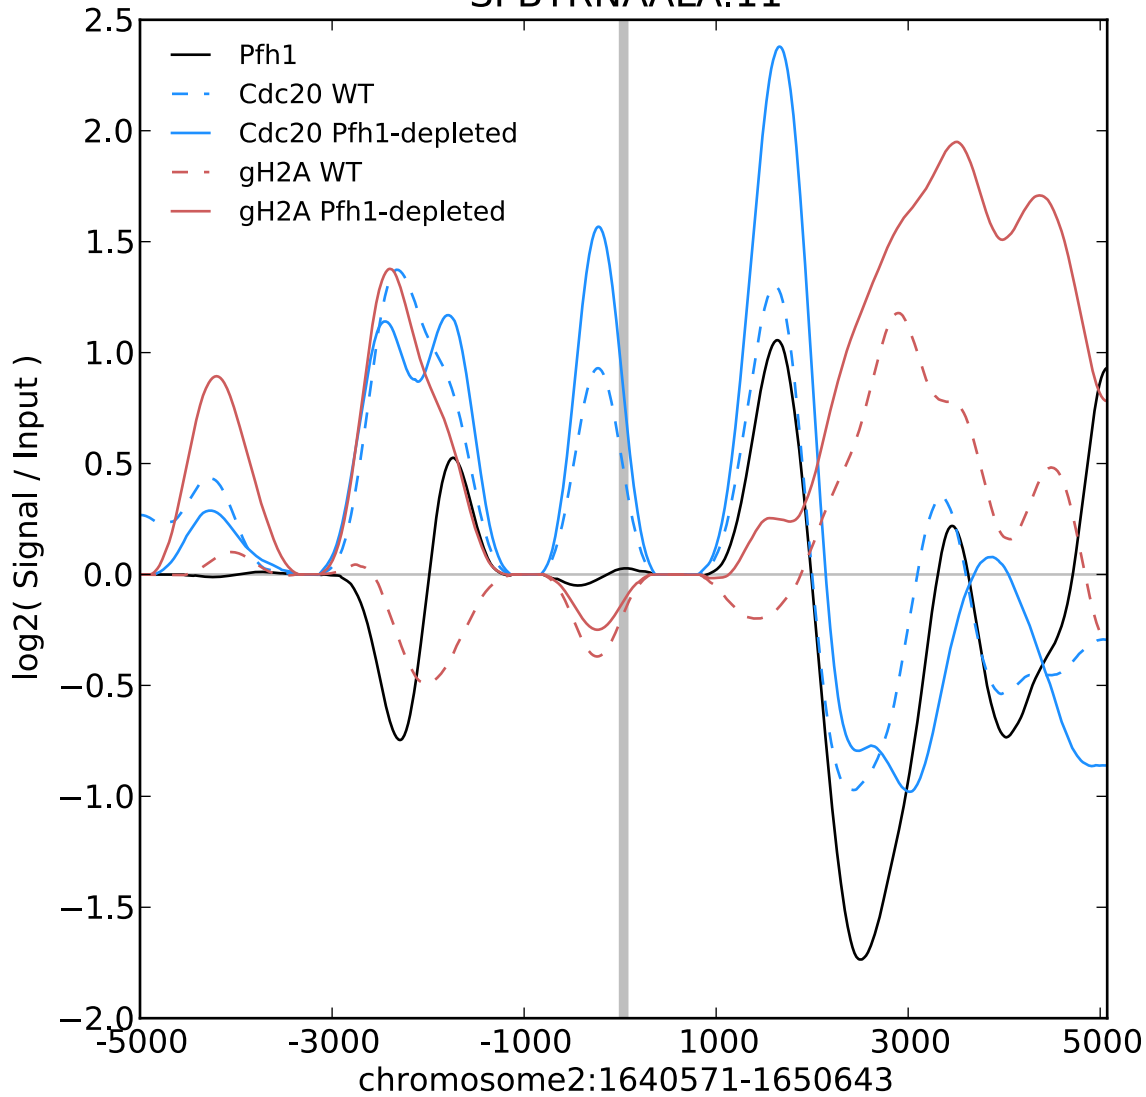

# SPBTRNAARG.04

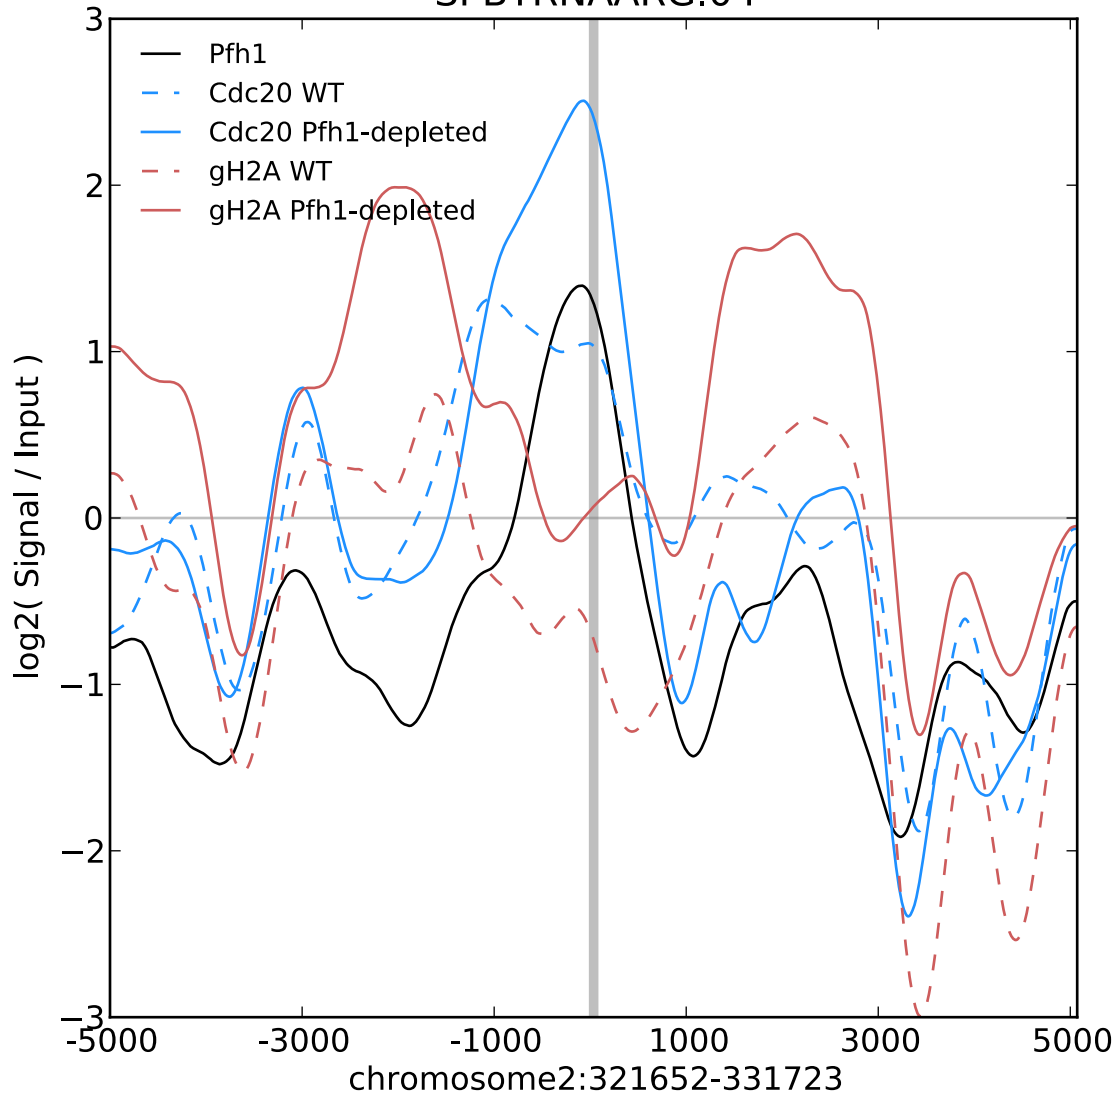

# SPBTRNAARG.05

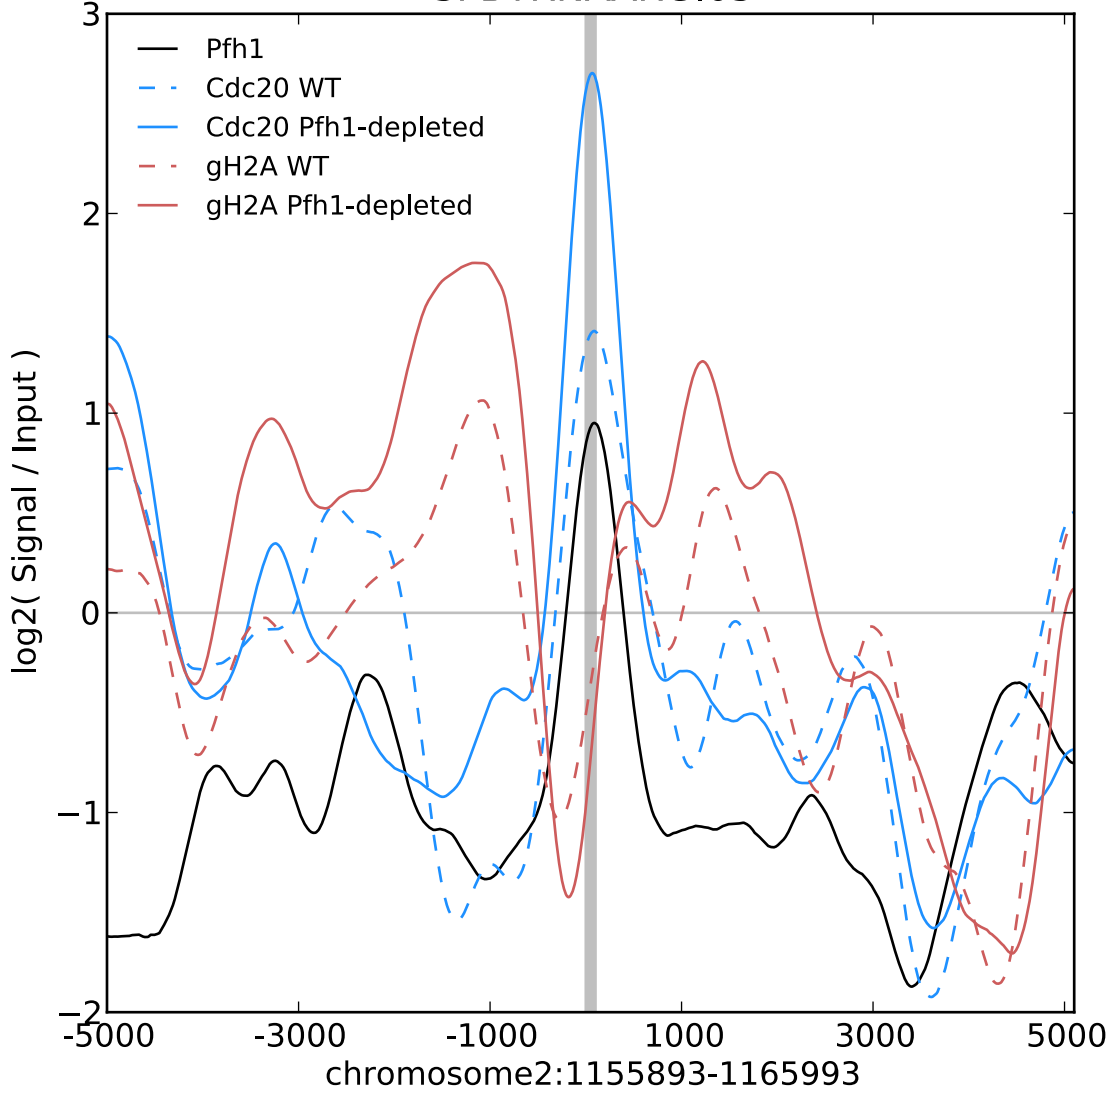

# SPBTRNAARG.06

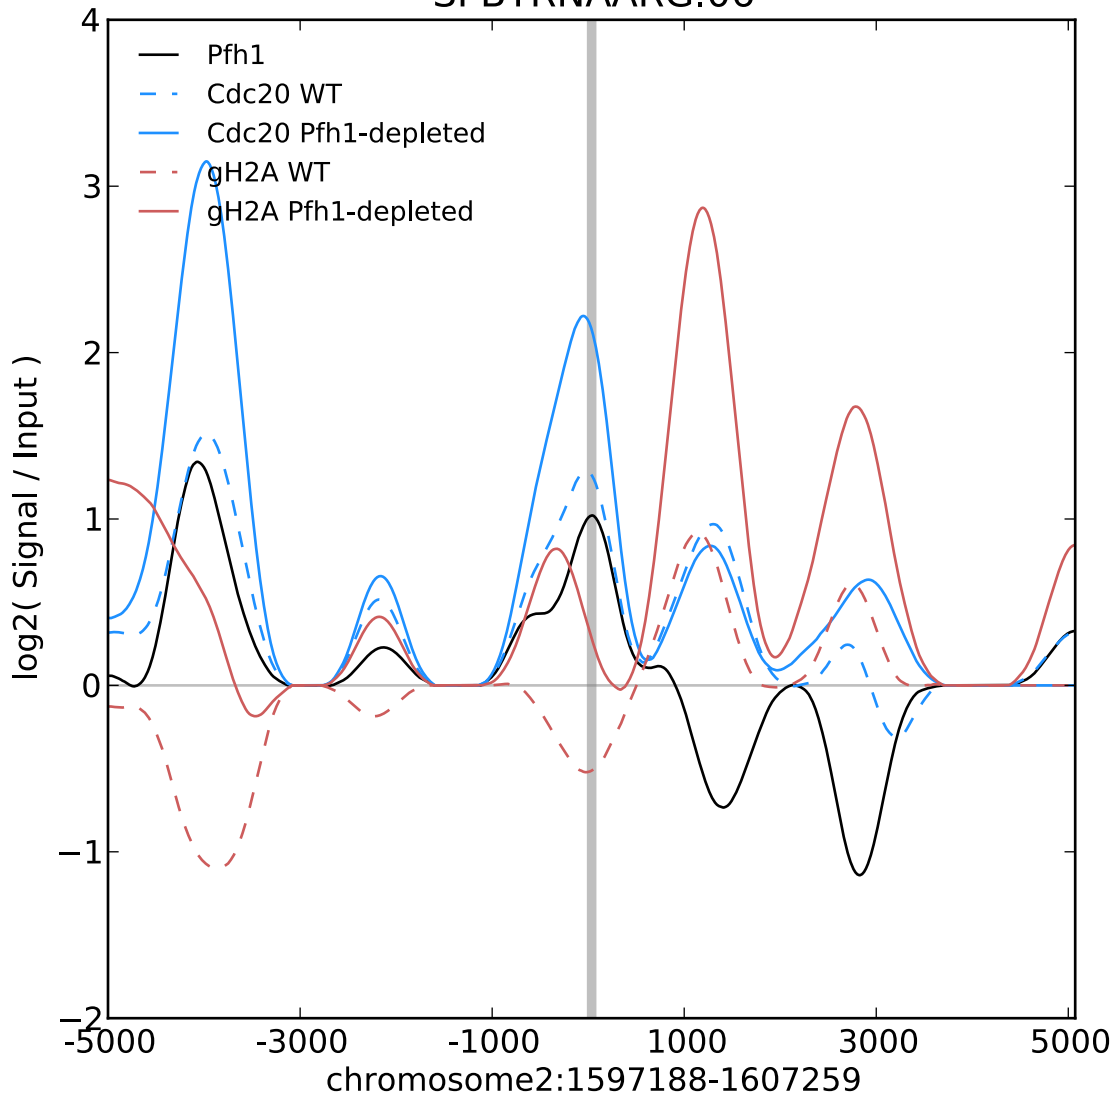

# SPBTRNAARG.07

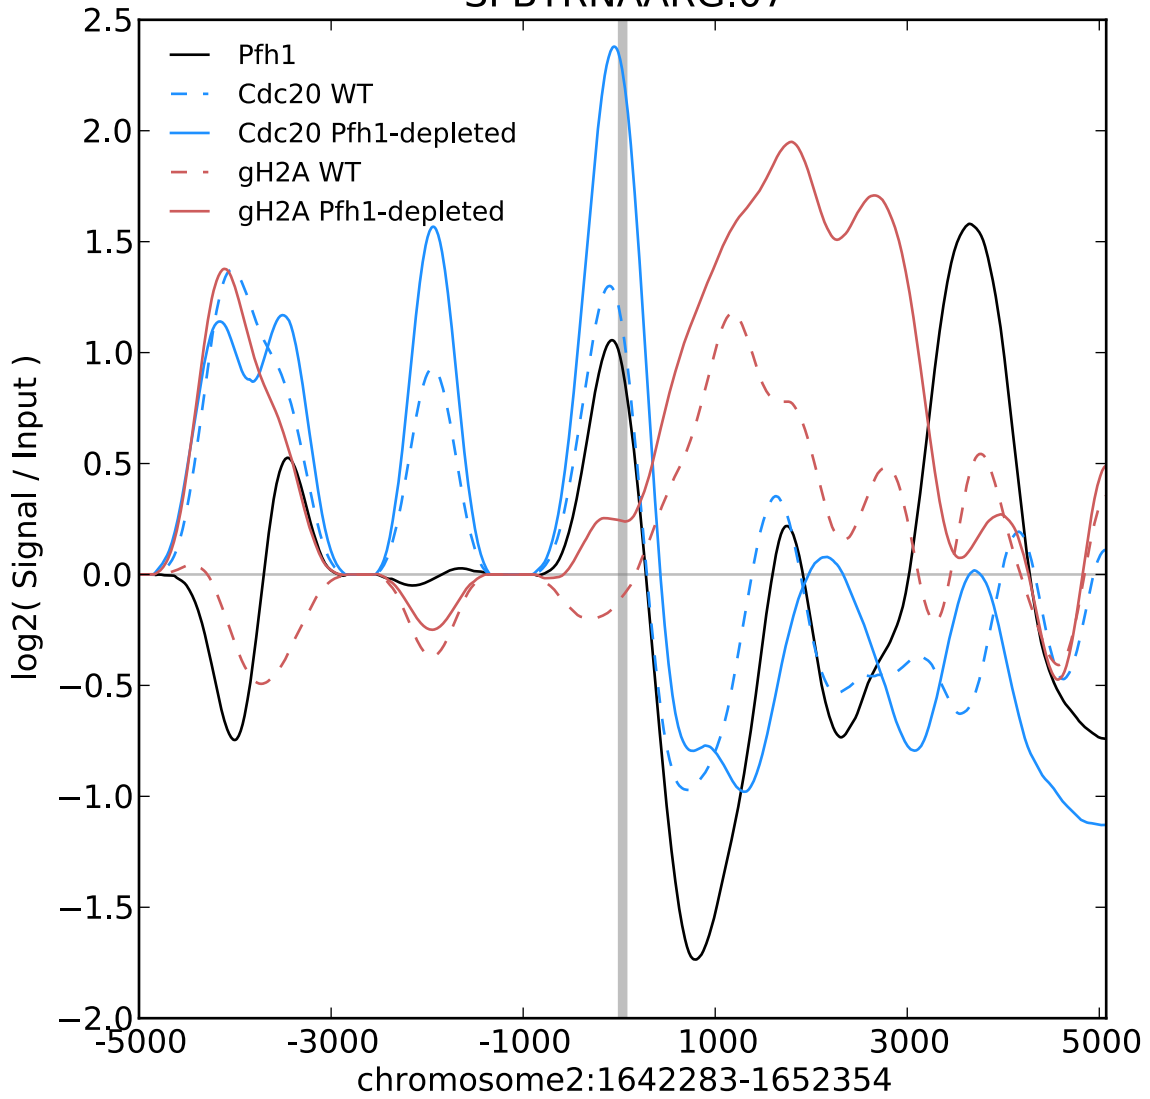

# SPBTRNAASN.01

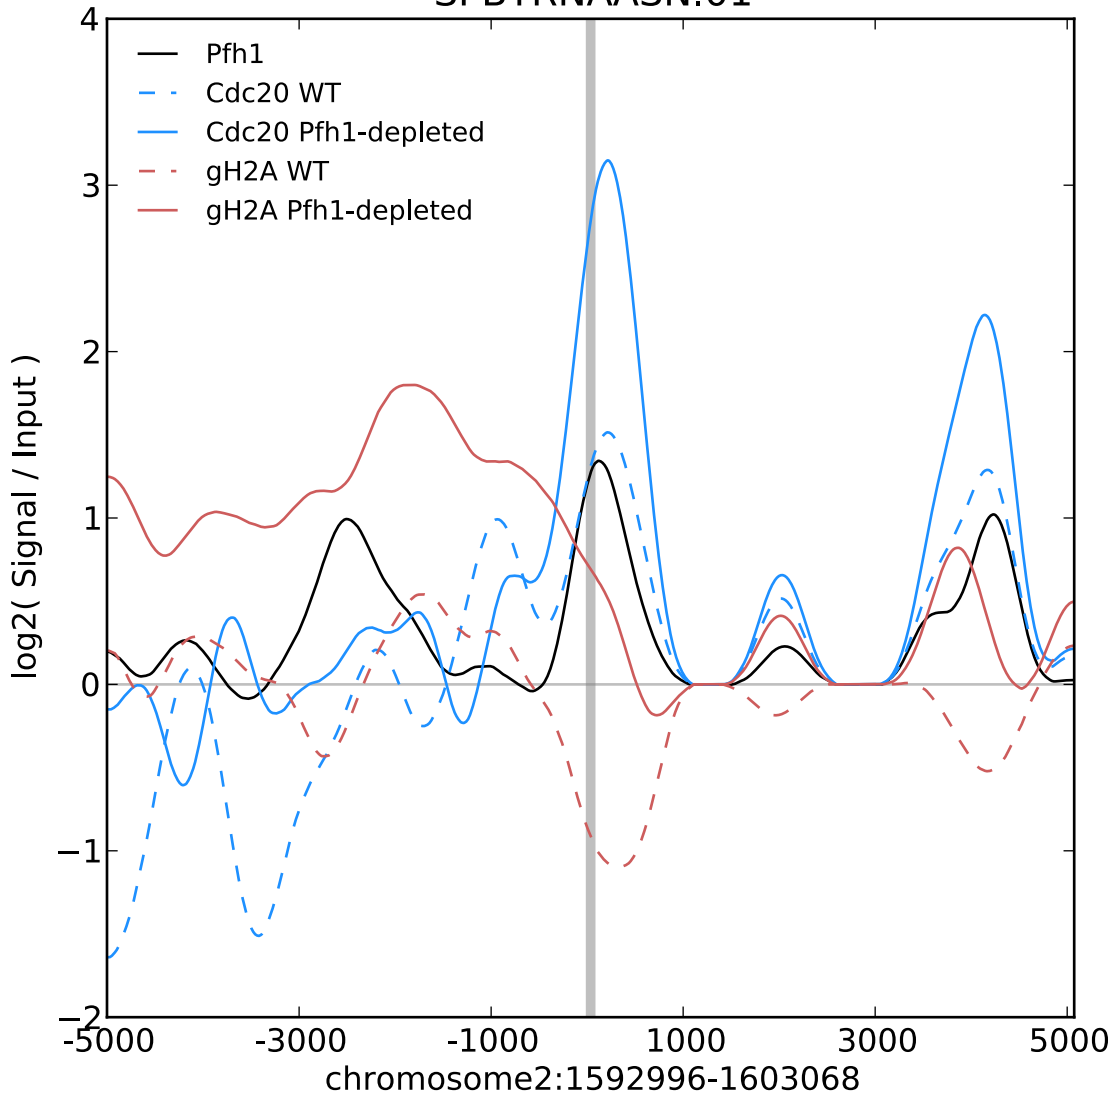

# SPBTRNAASN.02

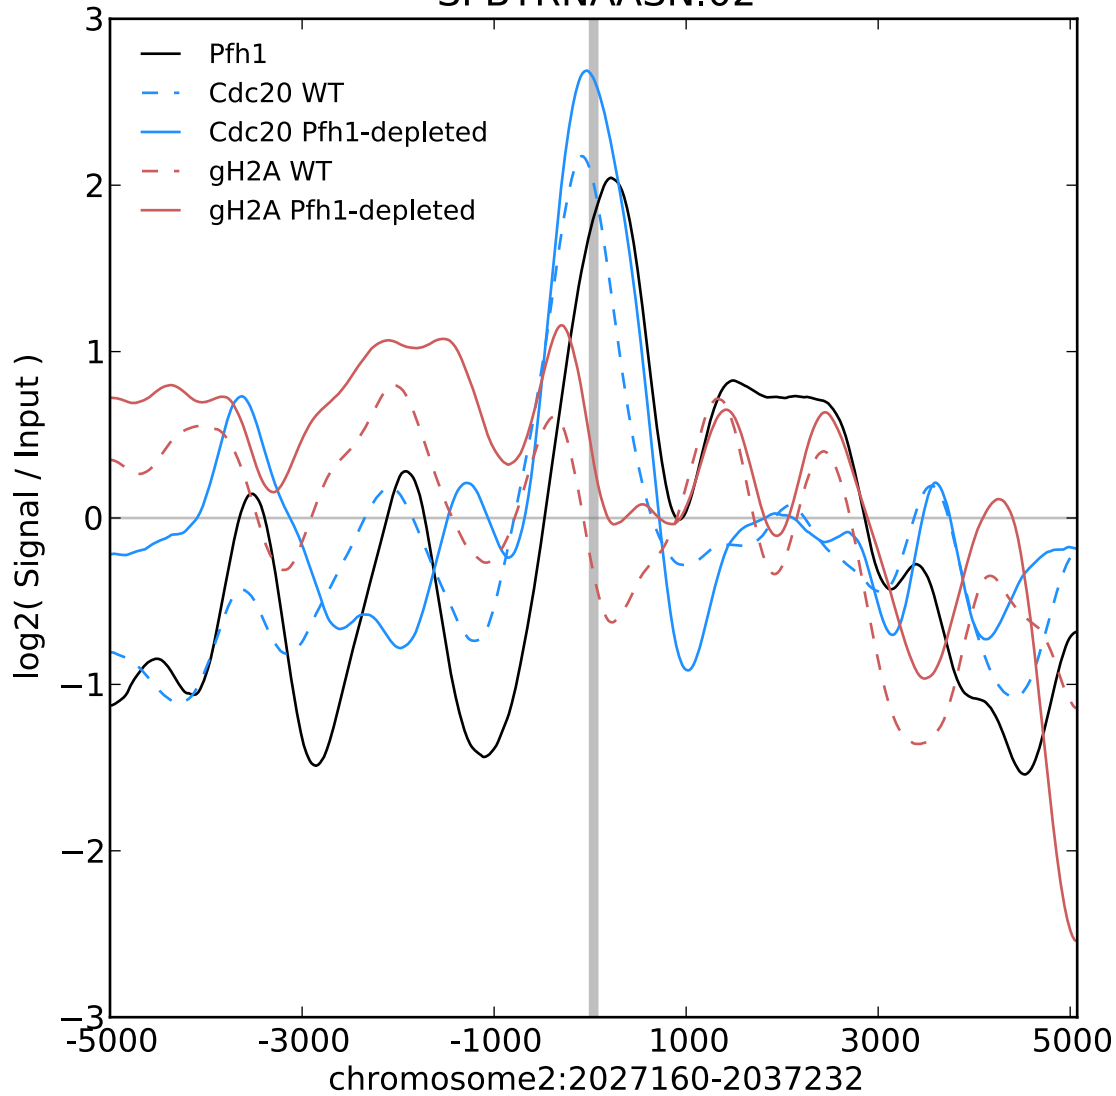

# SPBTRNAASN.03

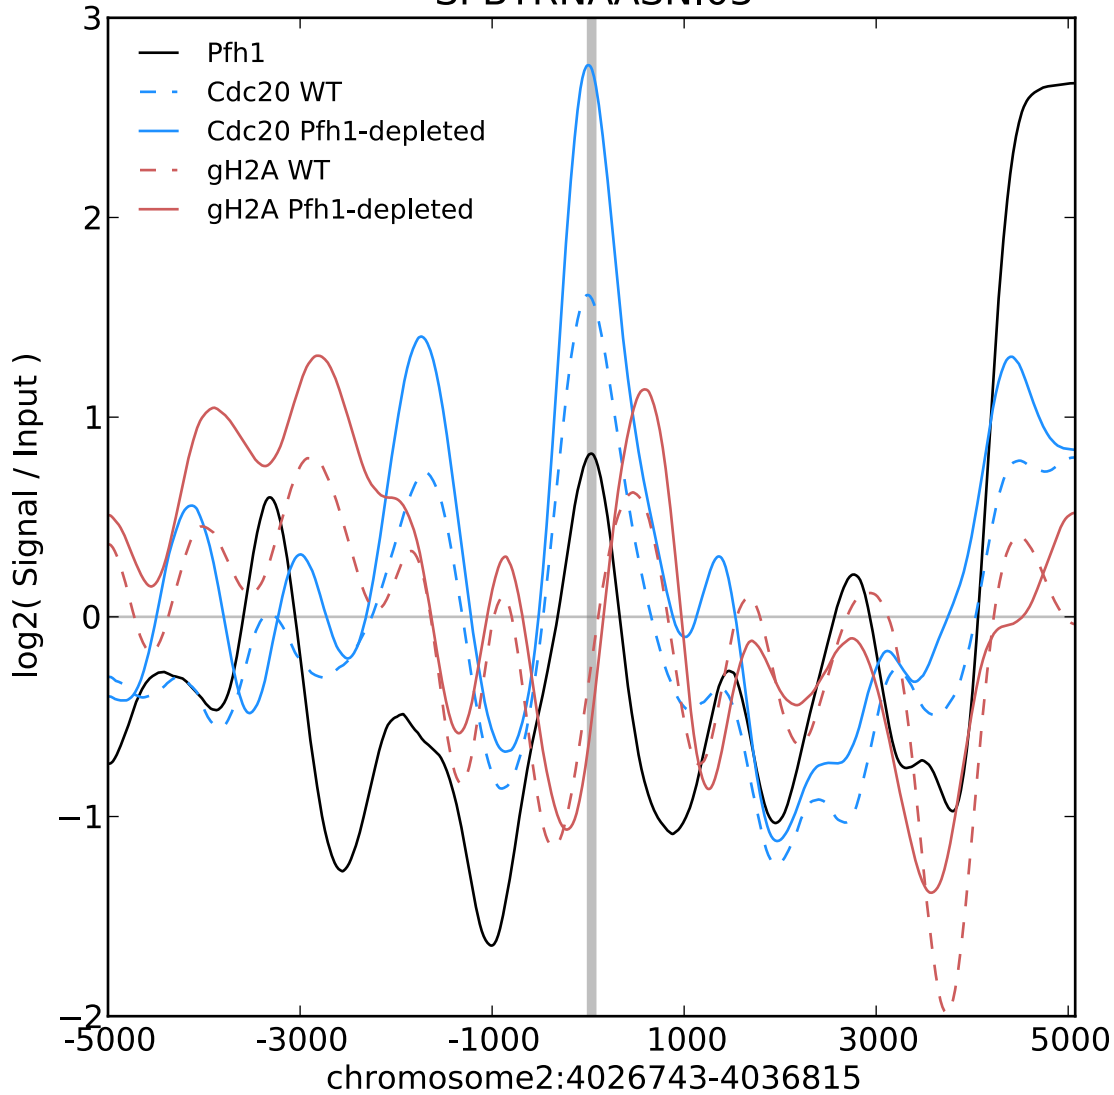



# SPBTRNAASN.04

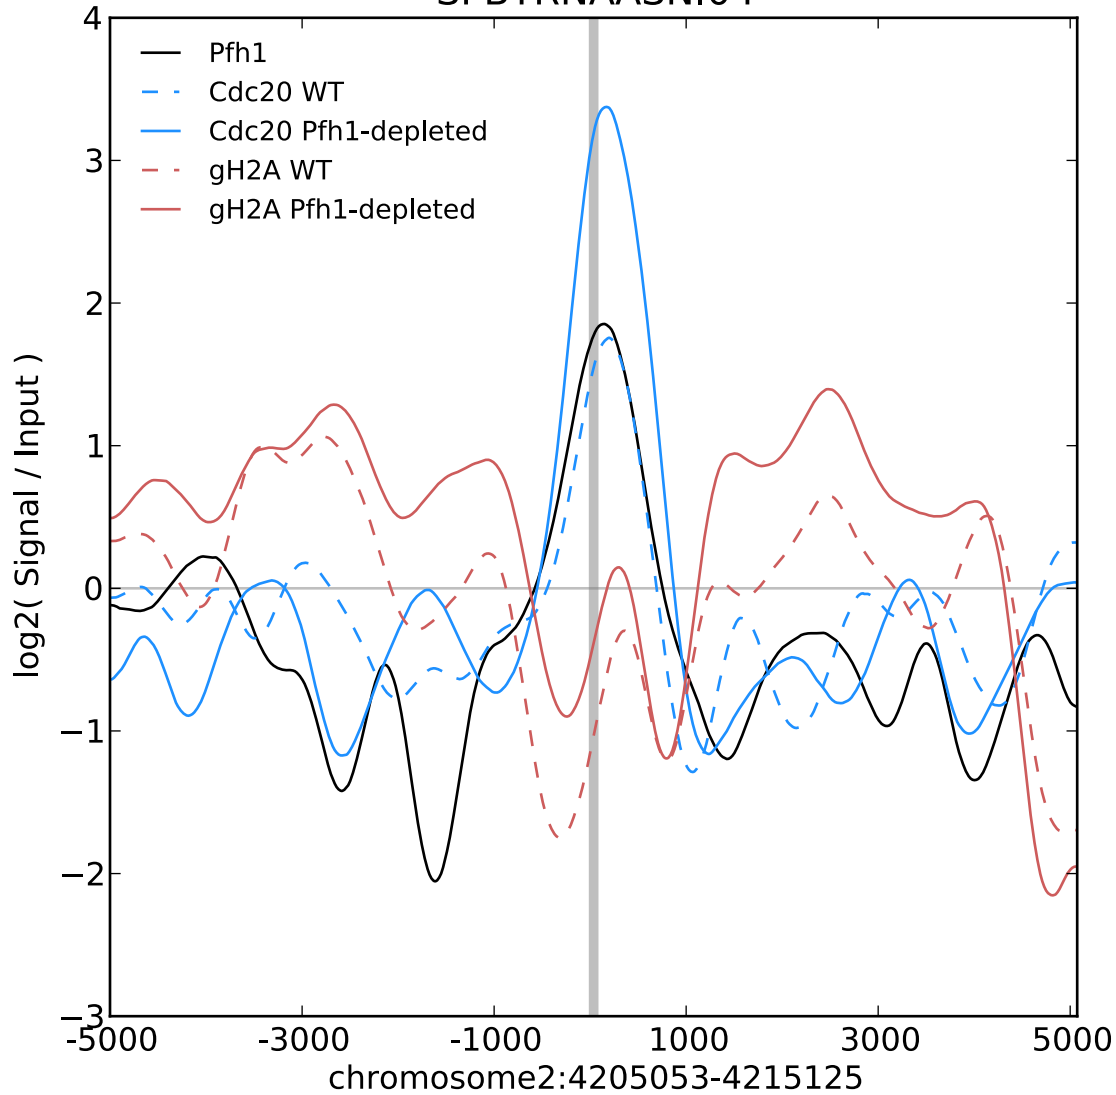

# SPBTRNAASP.03

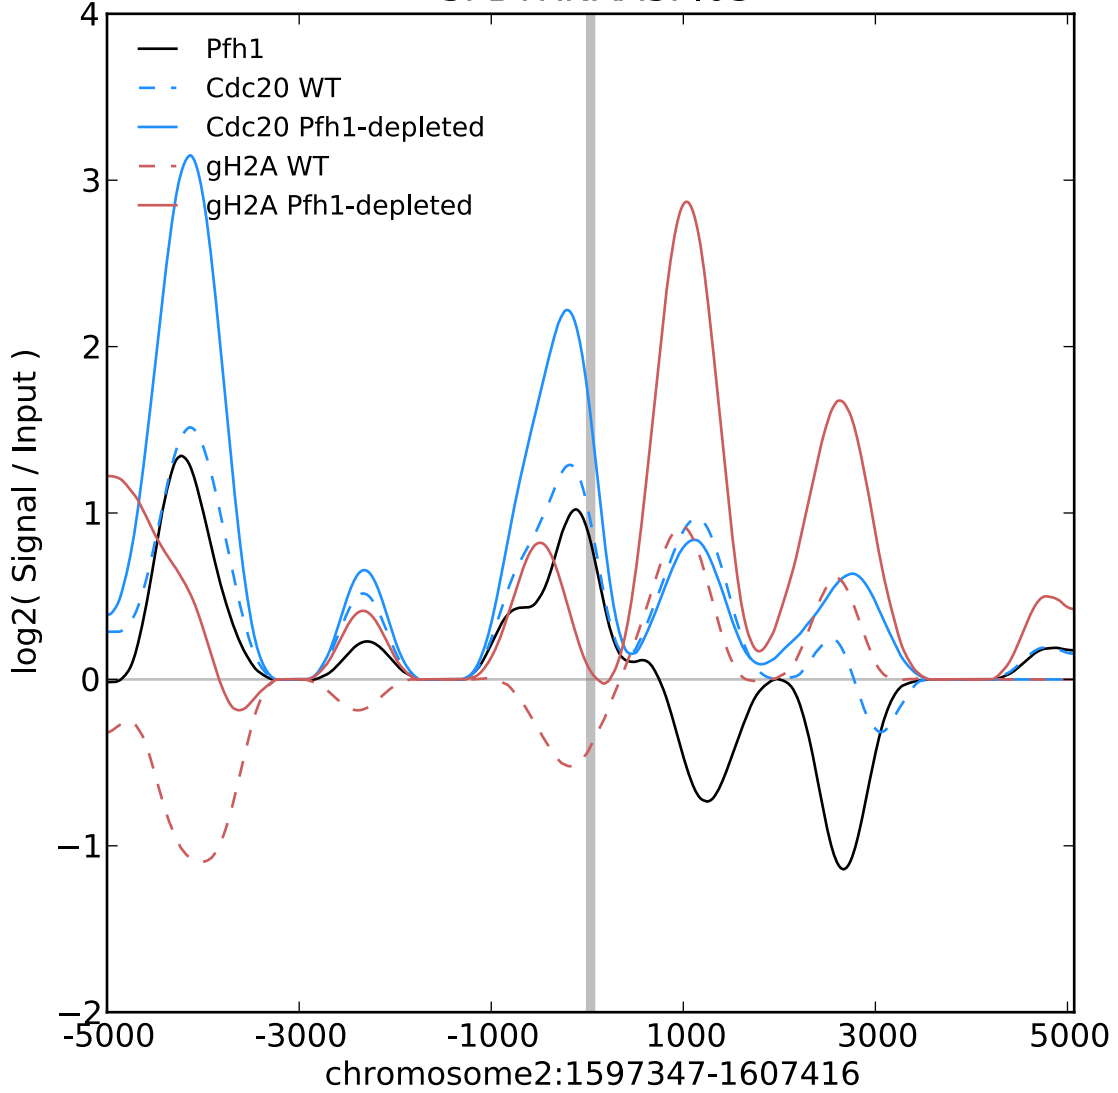

# SPBTRNAASP.04

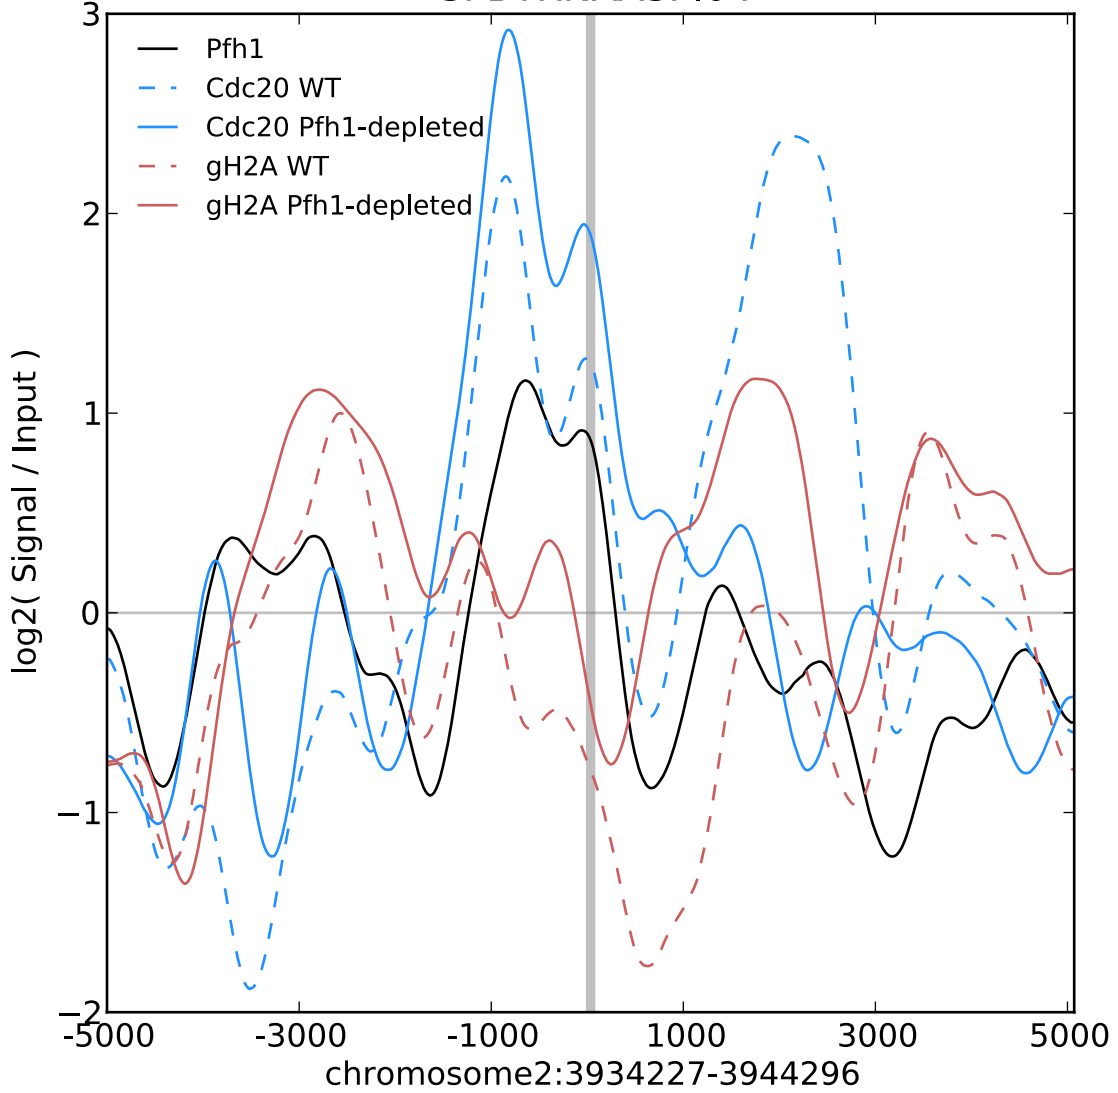

# SPBTRNAGLN.01

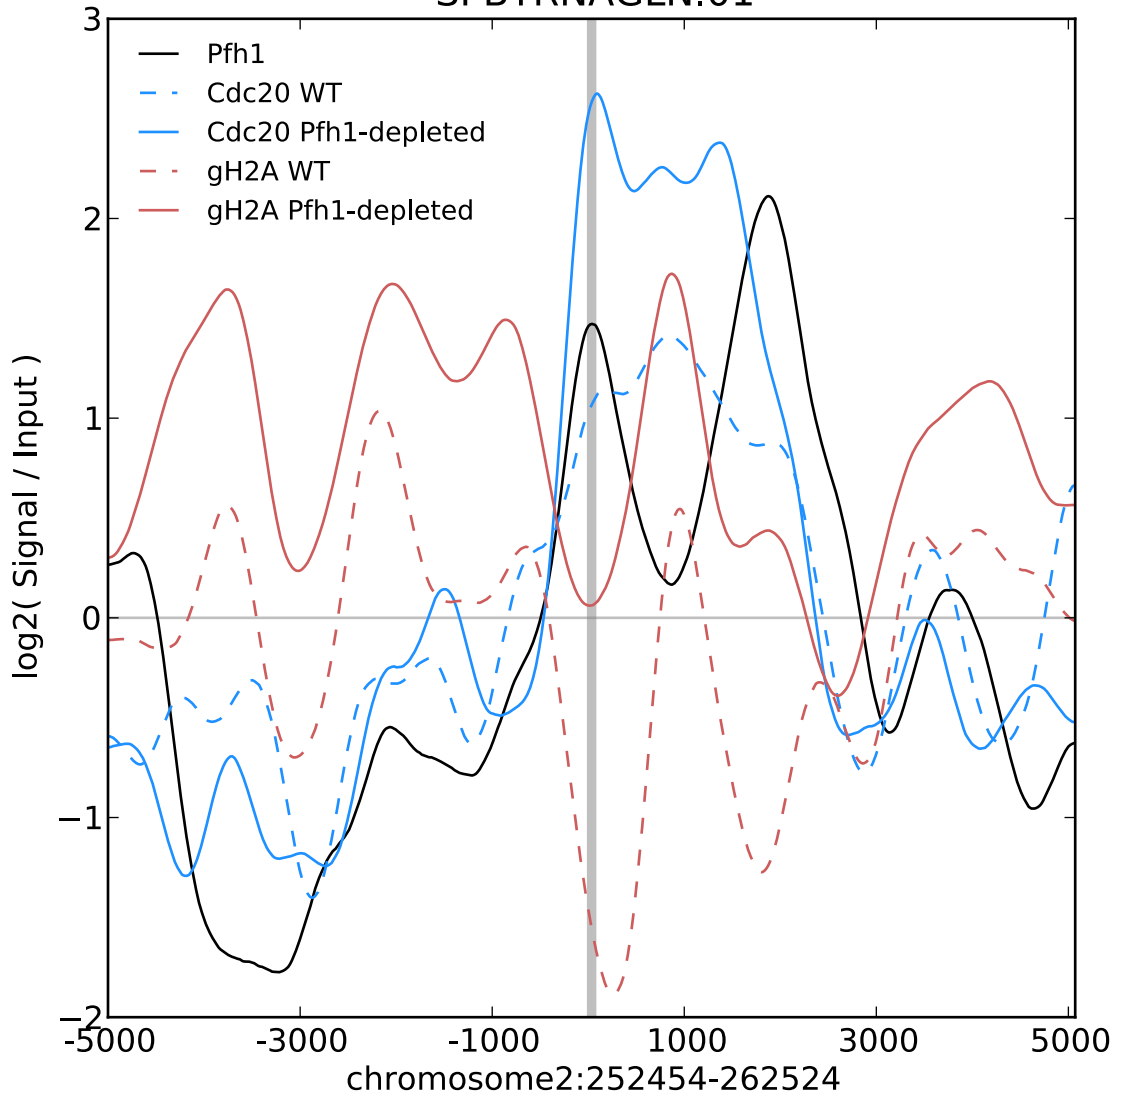

# SPBTRNAGLN.02

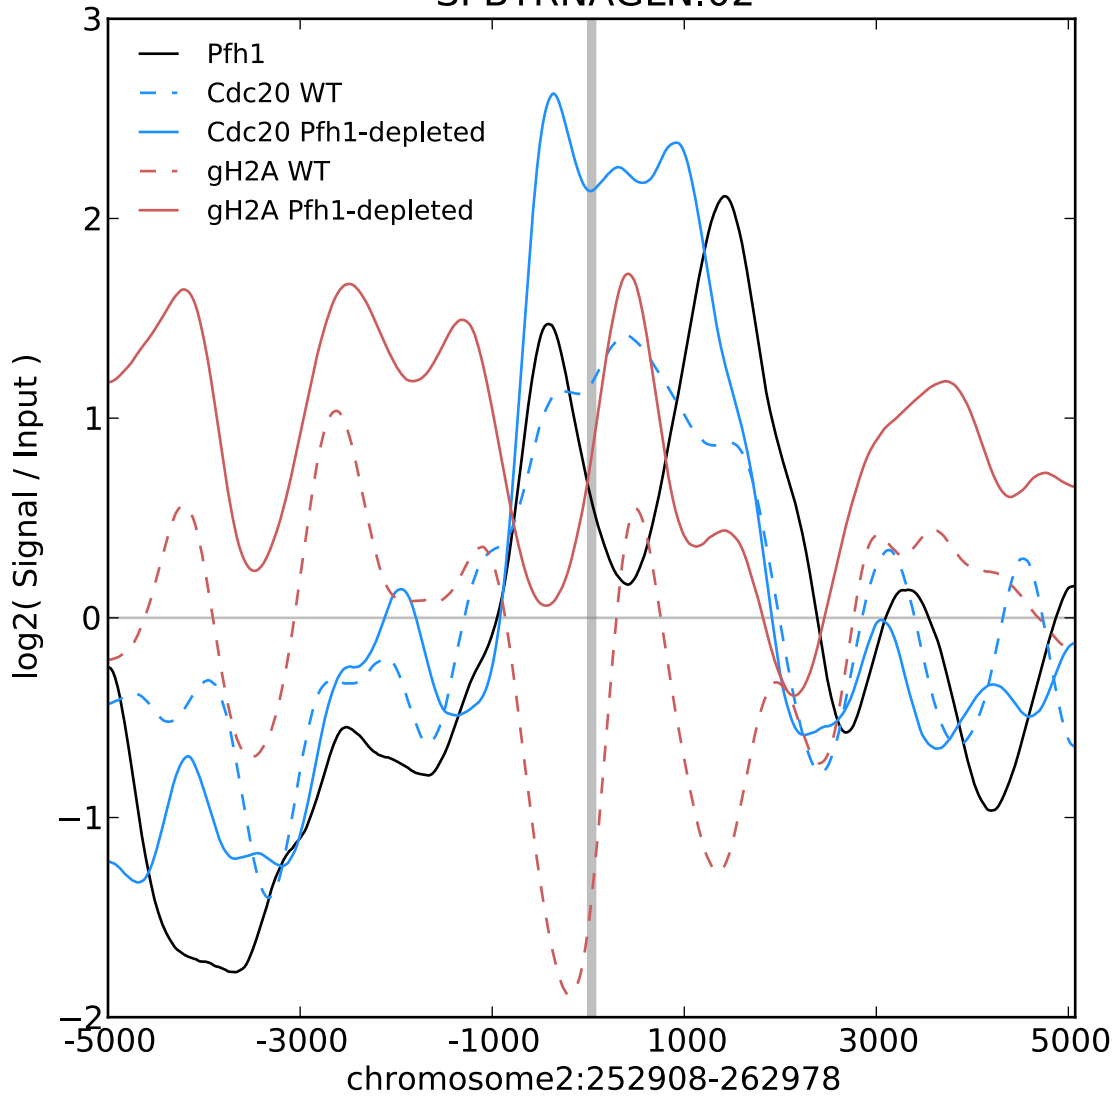

# SPBTRNAGLN.03

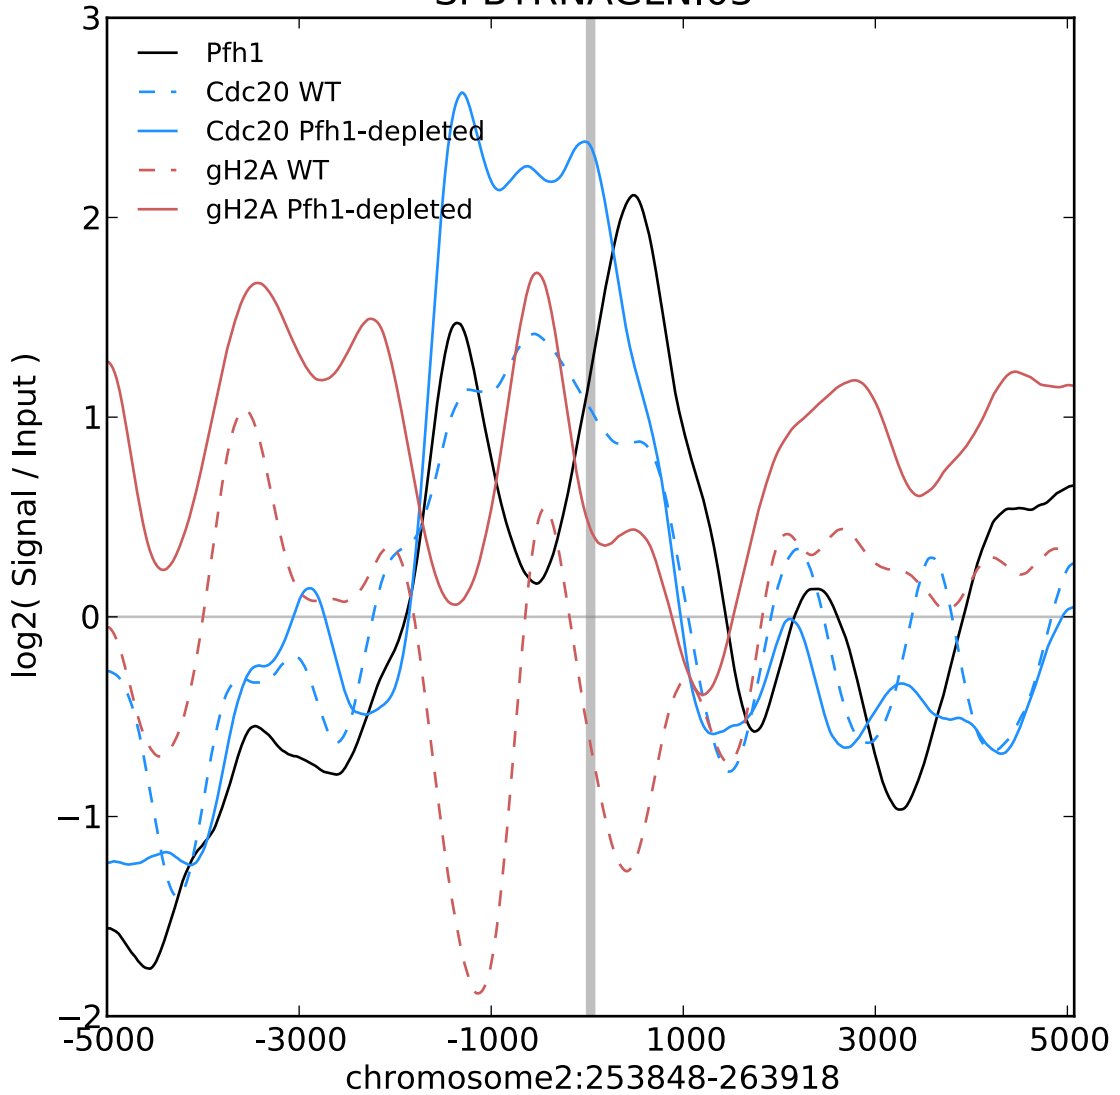

# SPBTRNAGLN.04

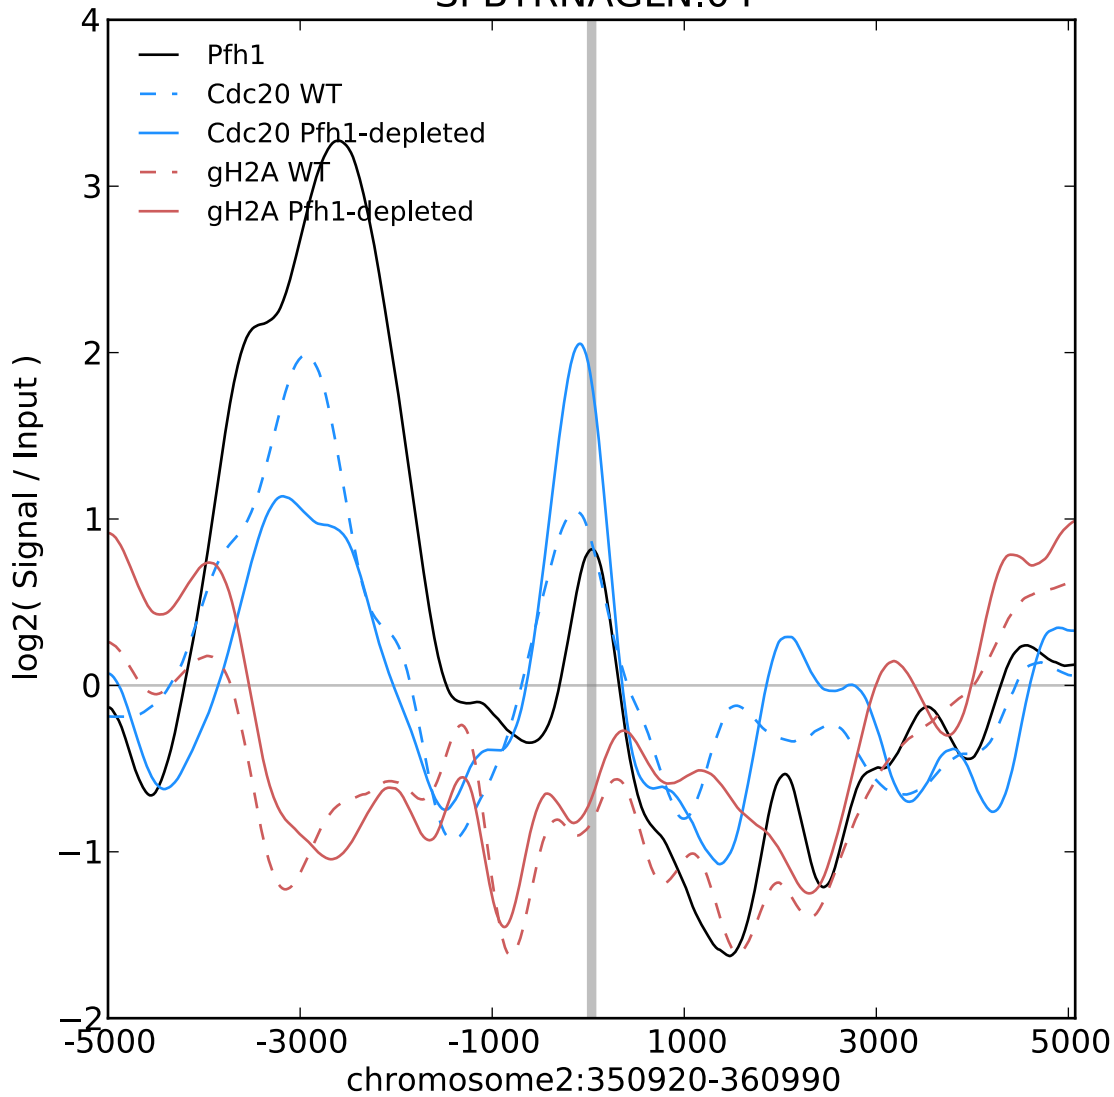

# SPBTRNAGLU.05

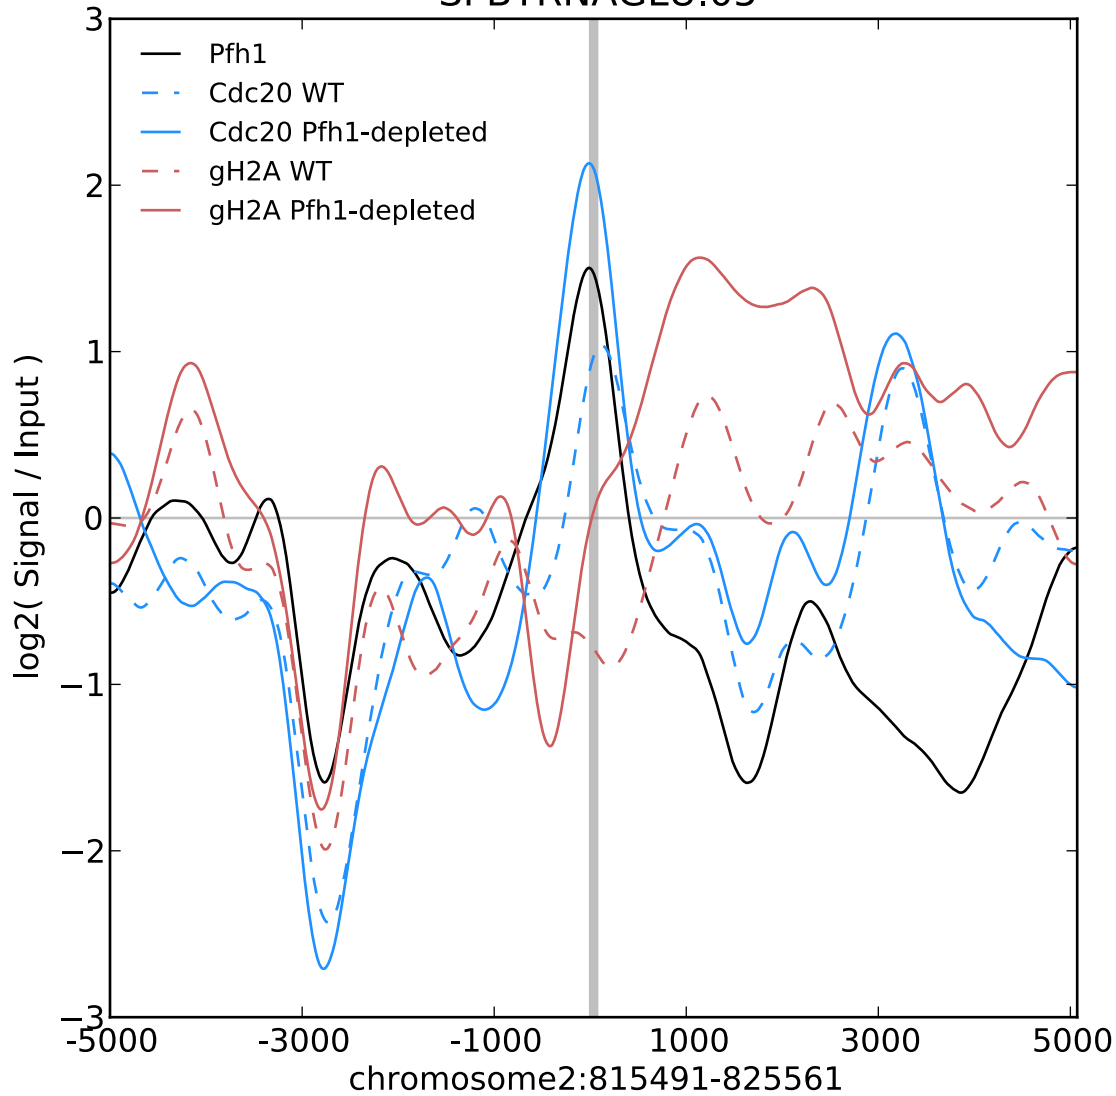



# SPBTRNAGLU.06

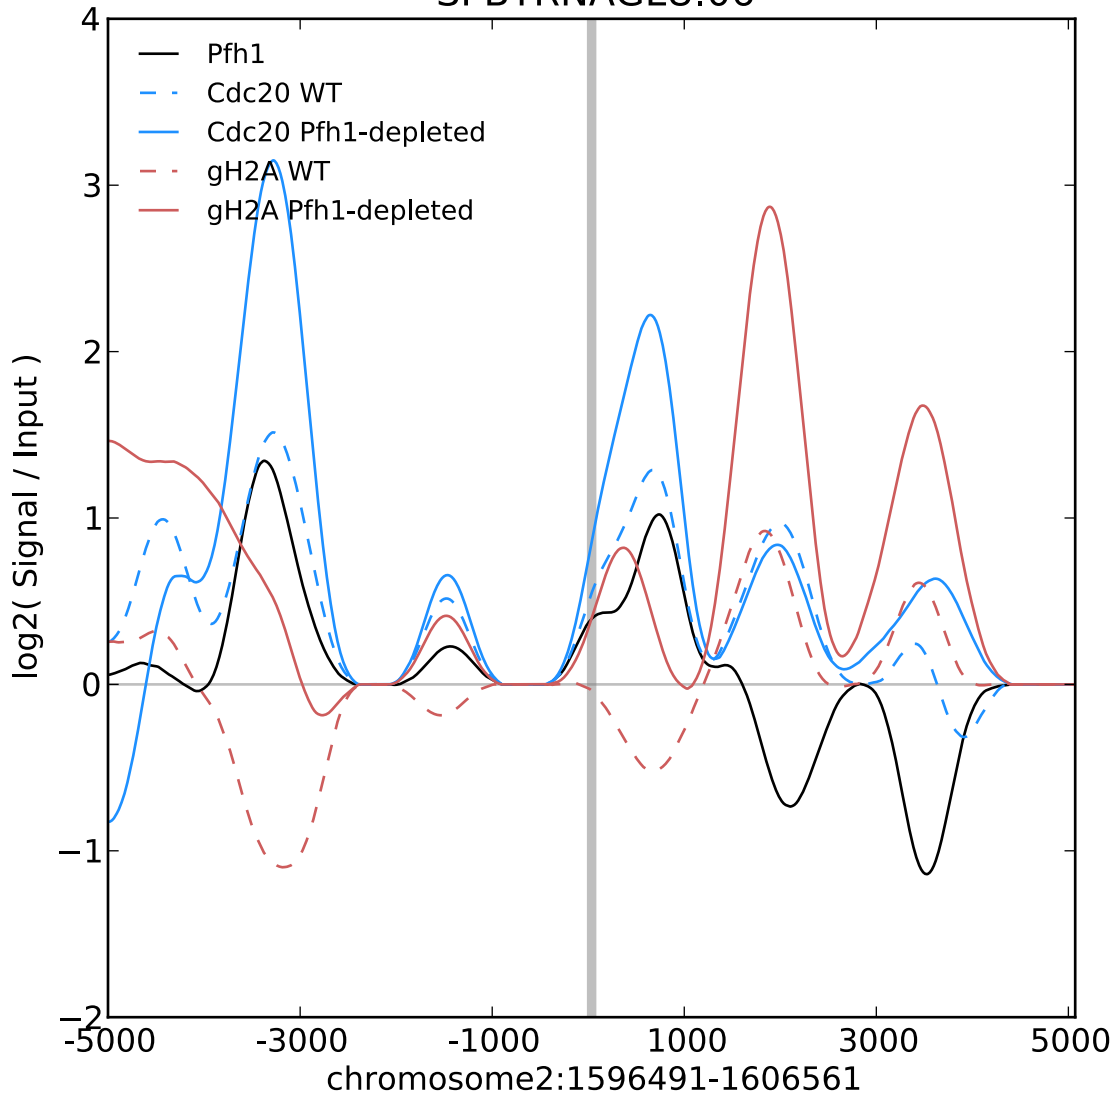

# SPBTRNAGLU.07

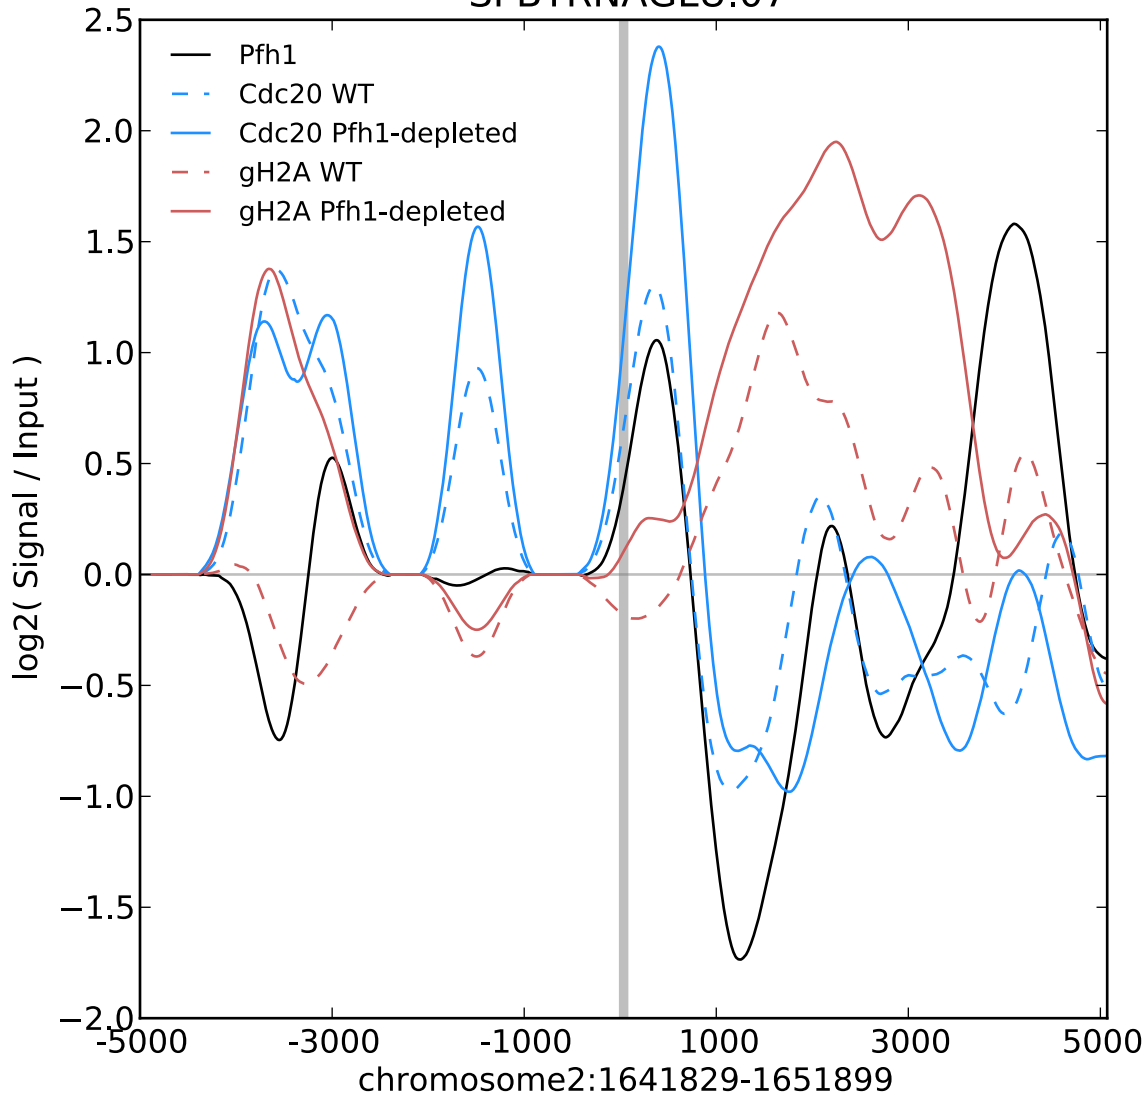

# SPBTRNAGLU.08

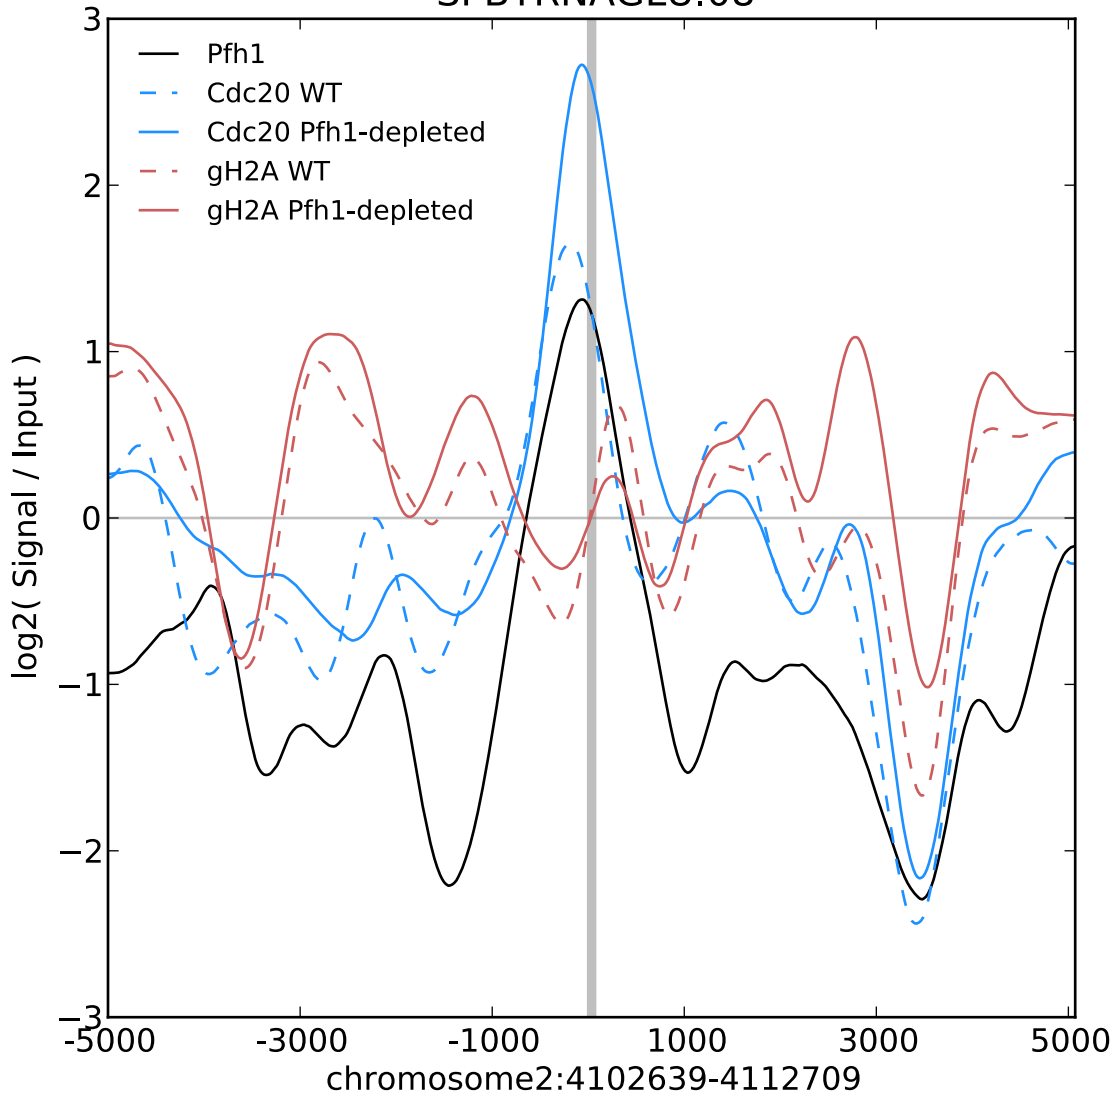

# SPBTRNAGLY.03

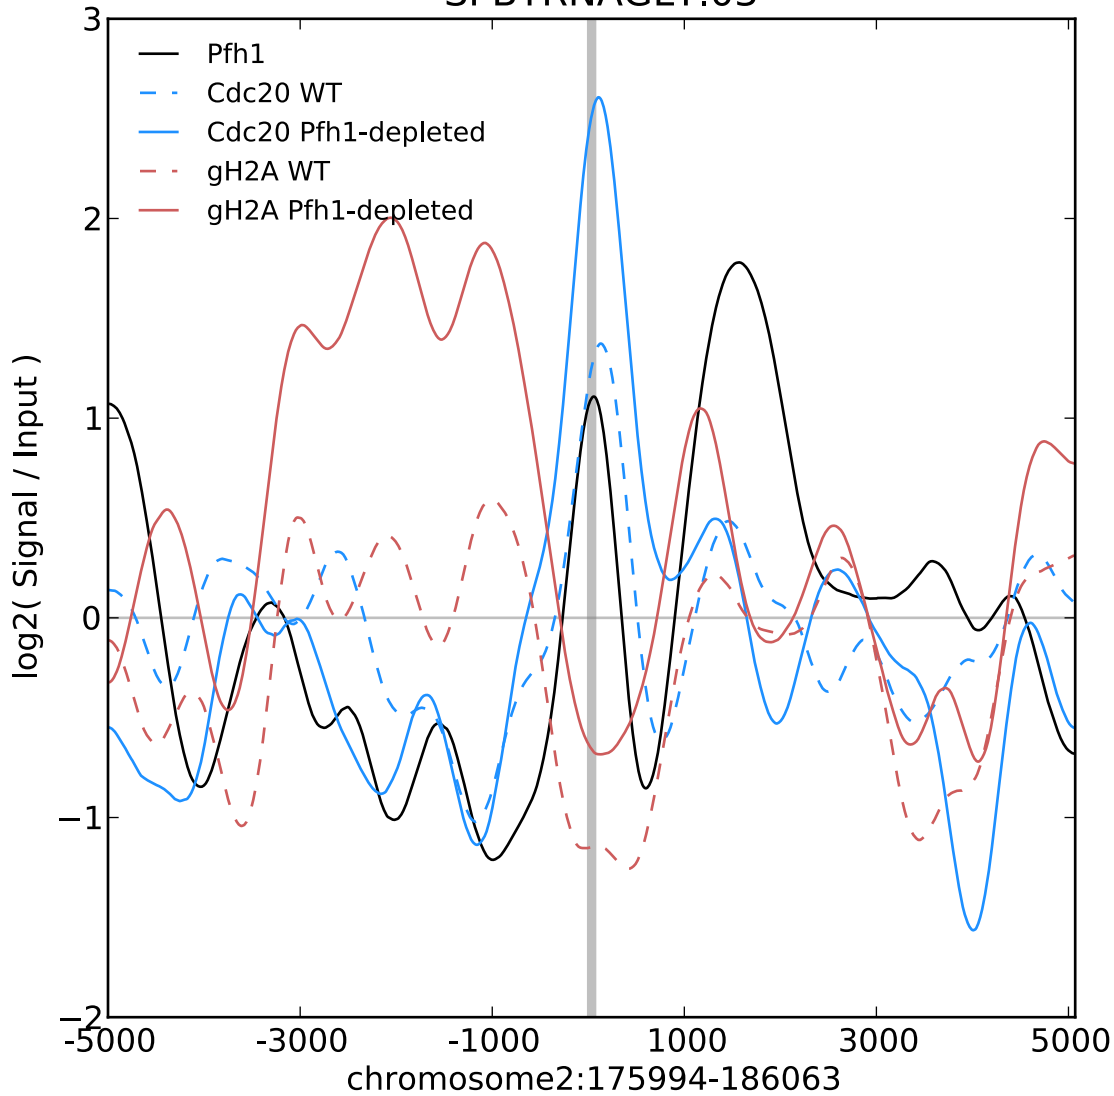

# SPBTRNAGLY.04

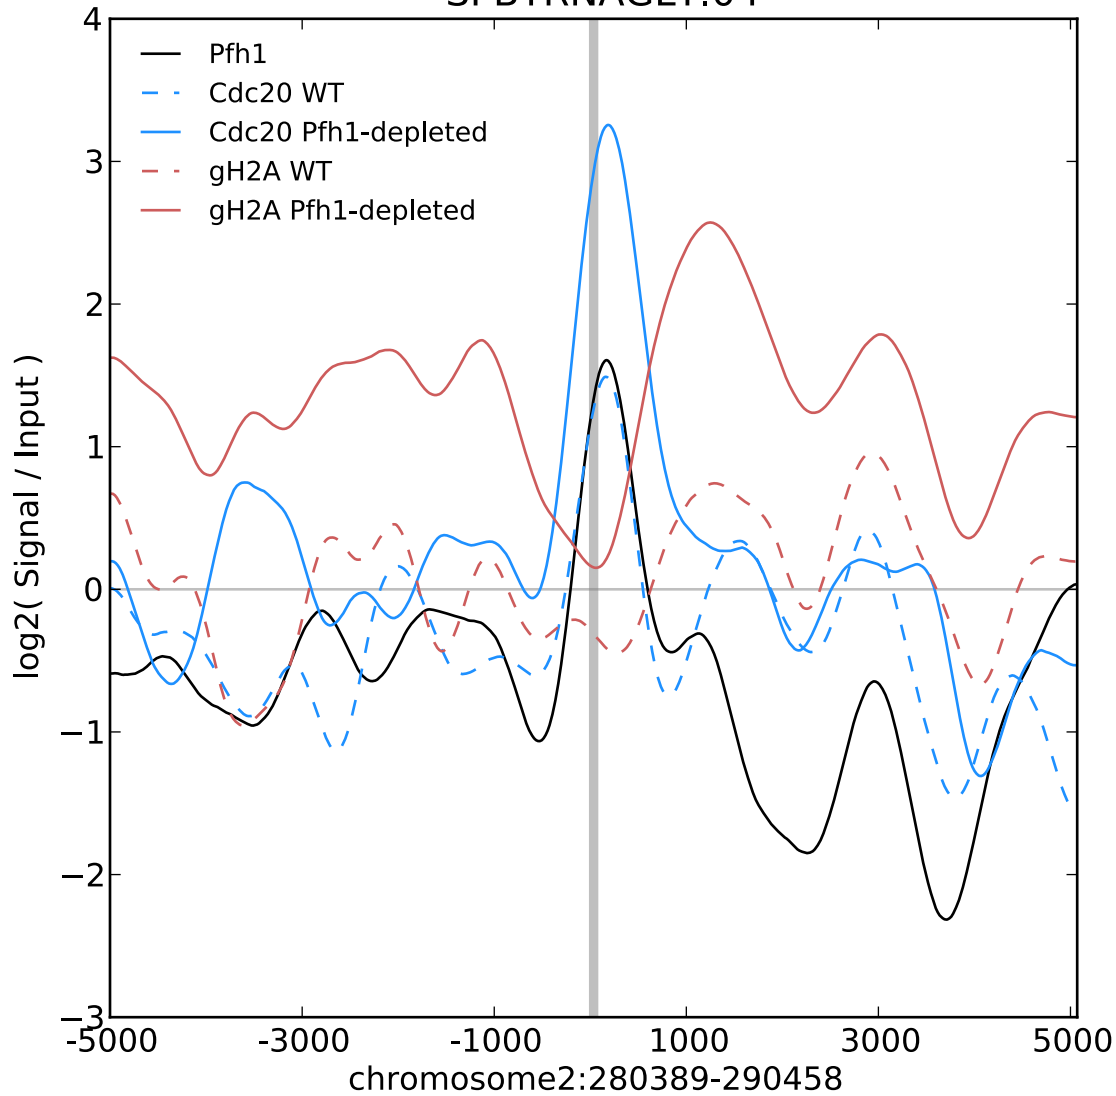

# SPBTRNAGLY.05

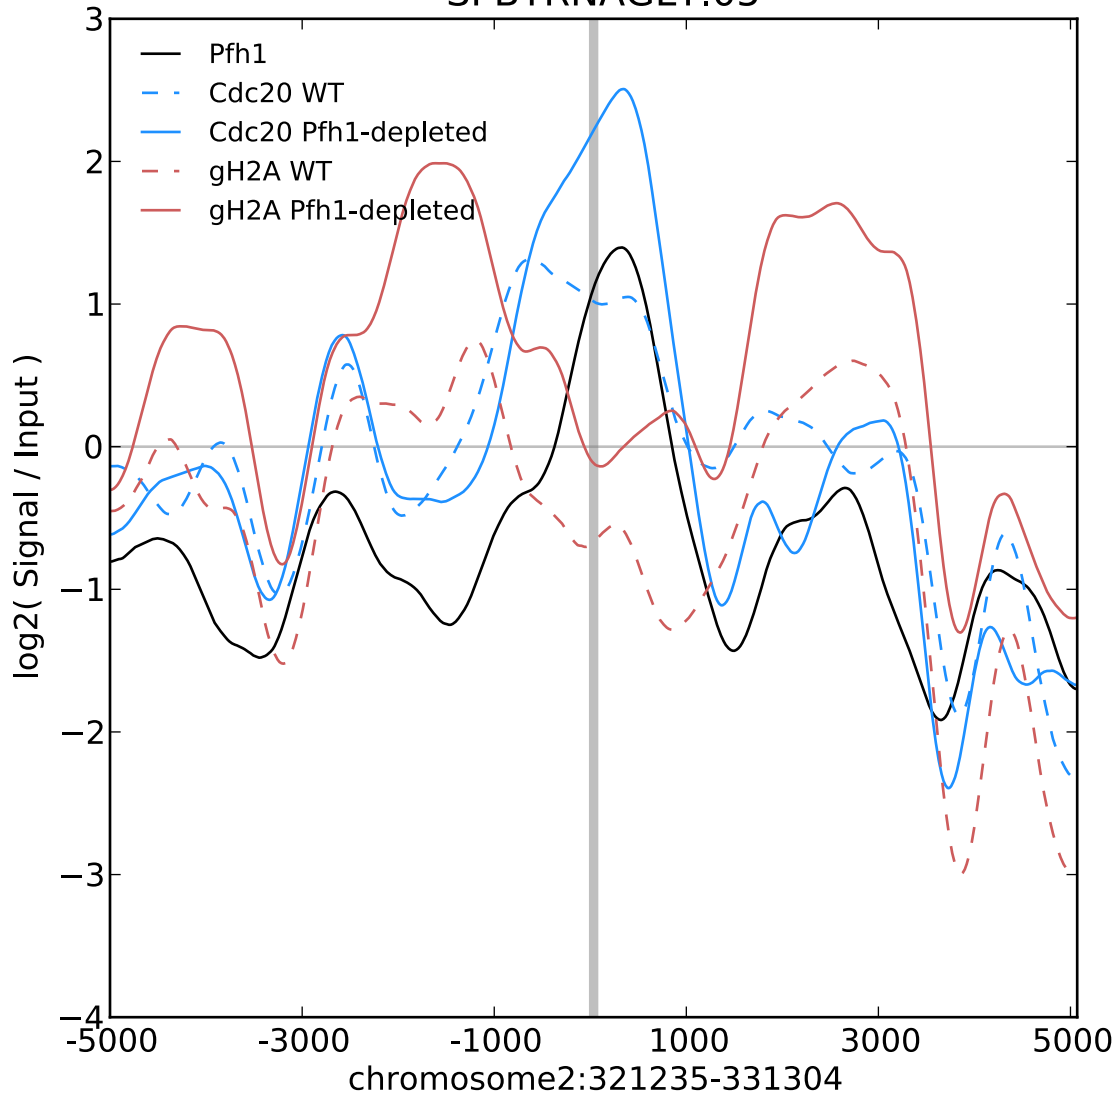

# SPBTRNAGLY.06

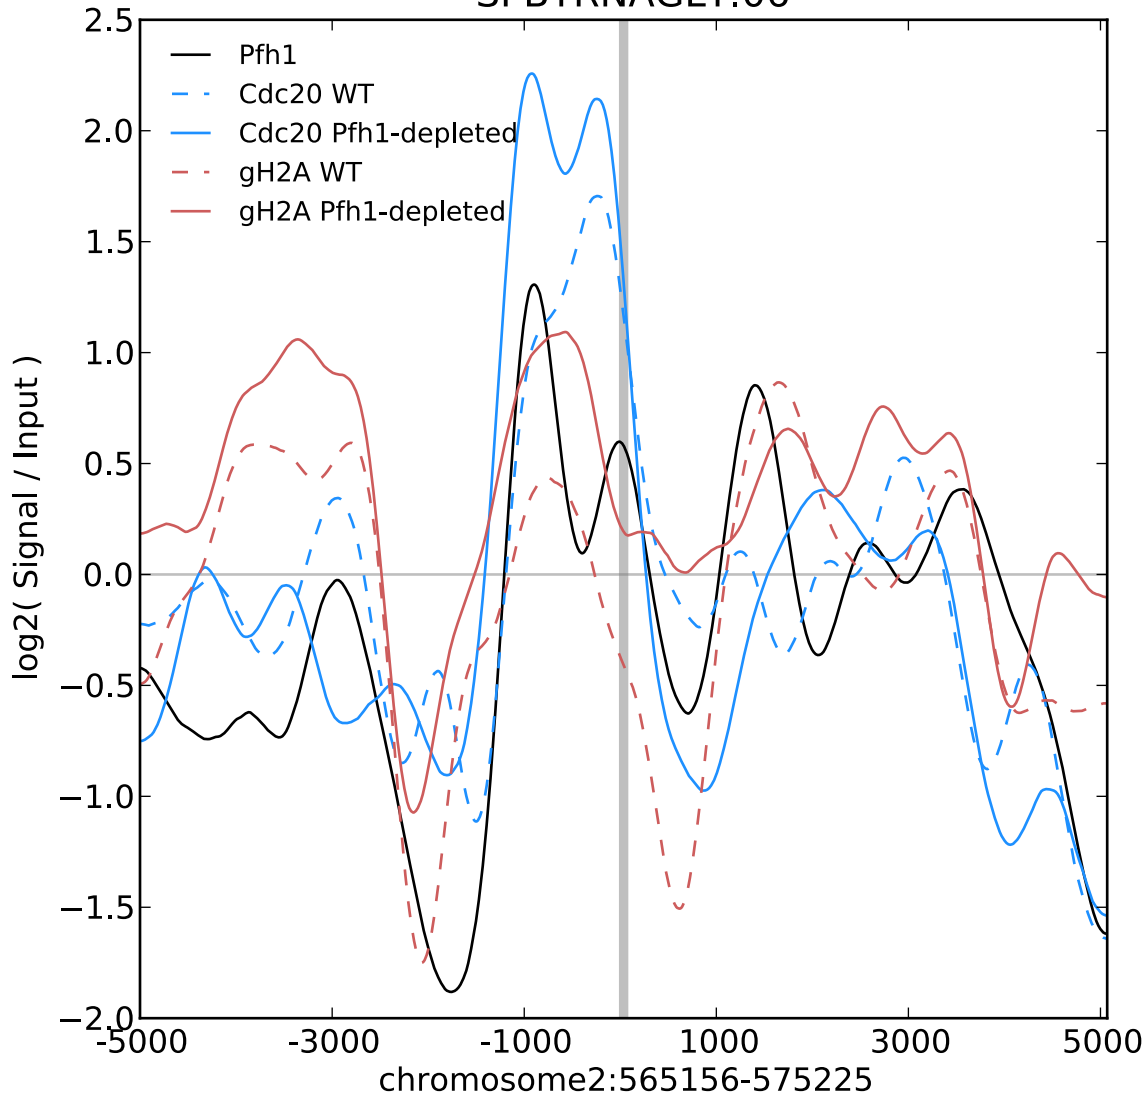

# SPBTRNAGLY.07

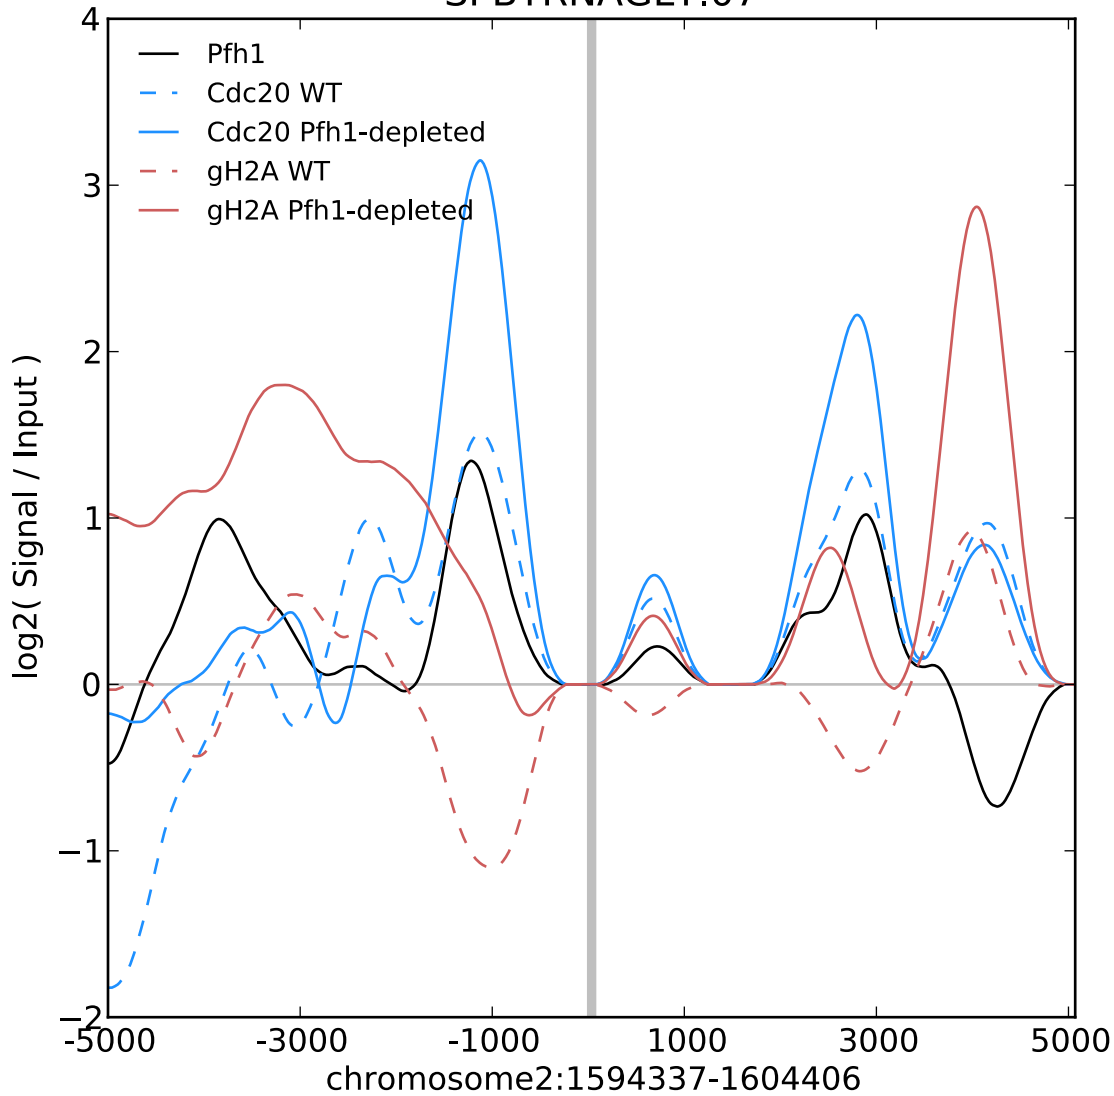



# SPBTRNAGLY.08

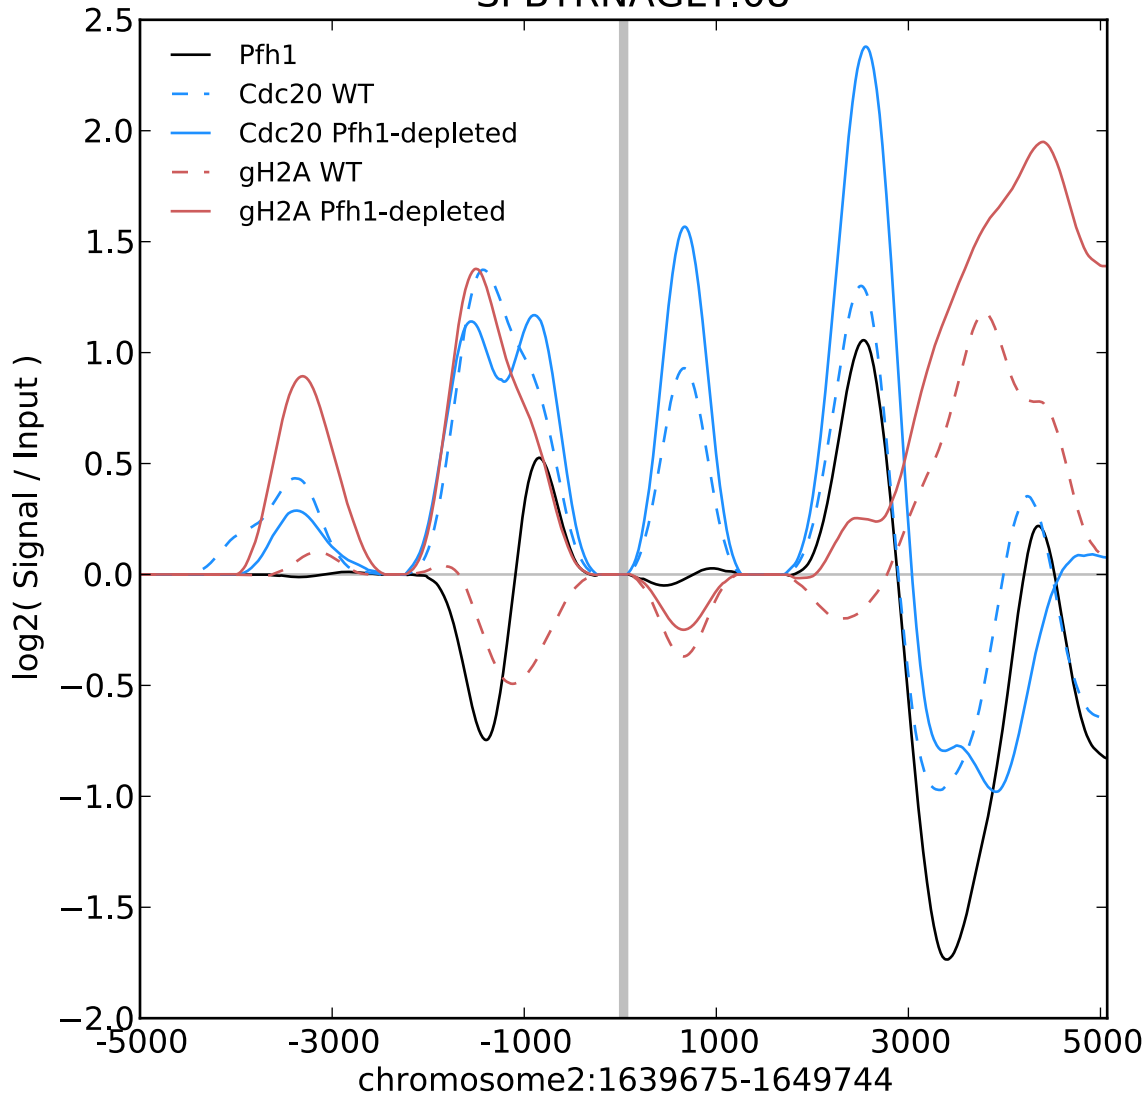

# SPBTRNAGLY.09

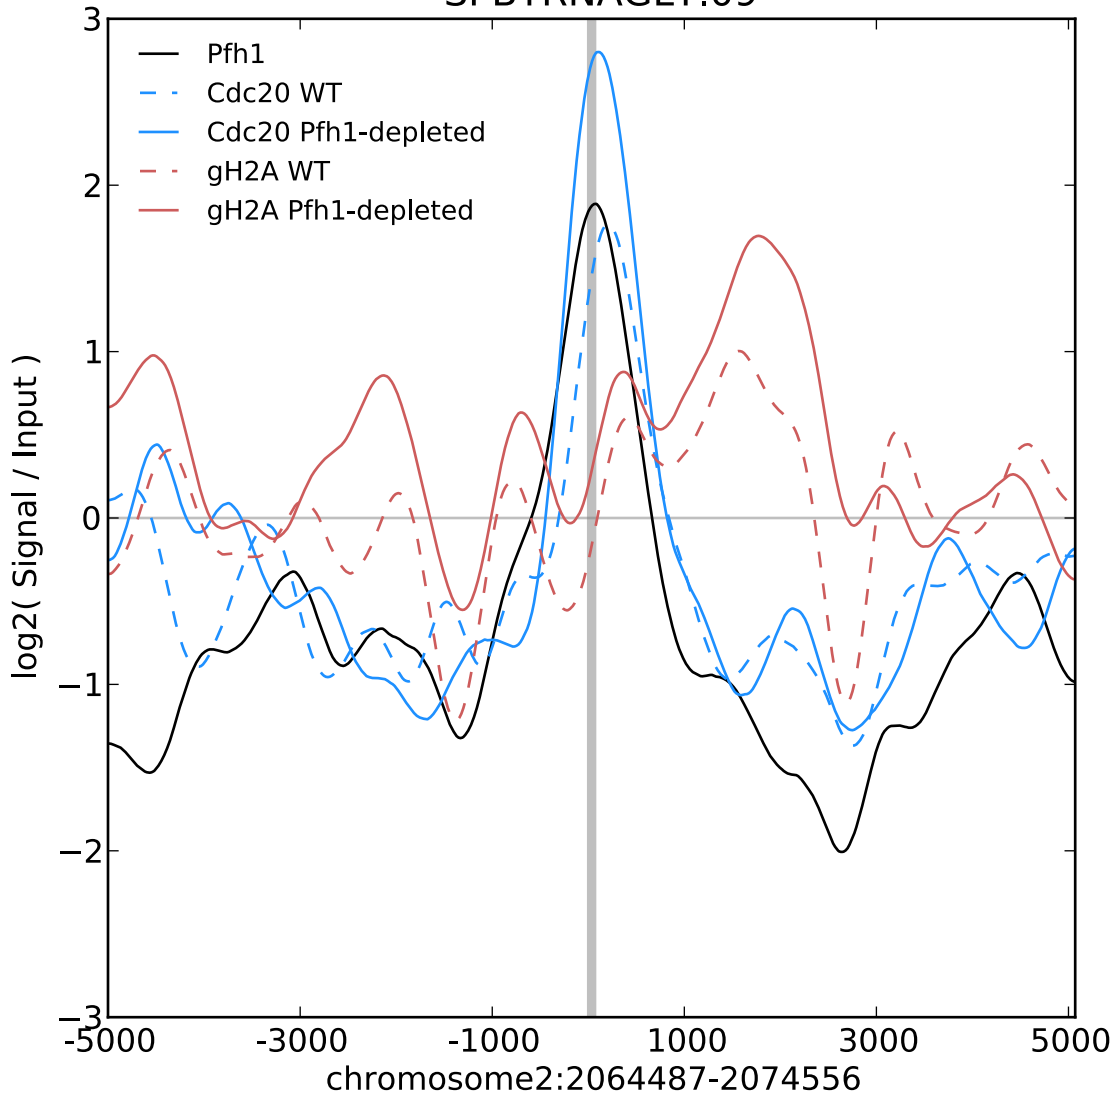

# SPBTRNAHIS.01

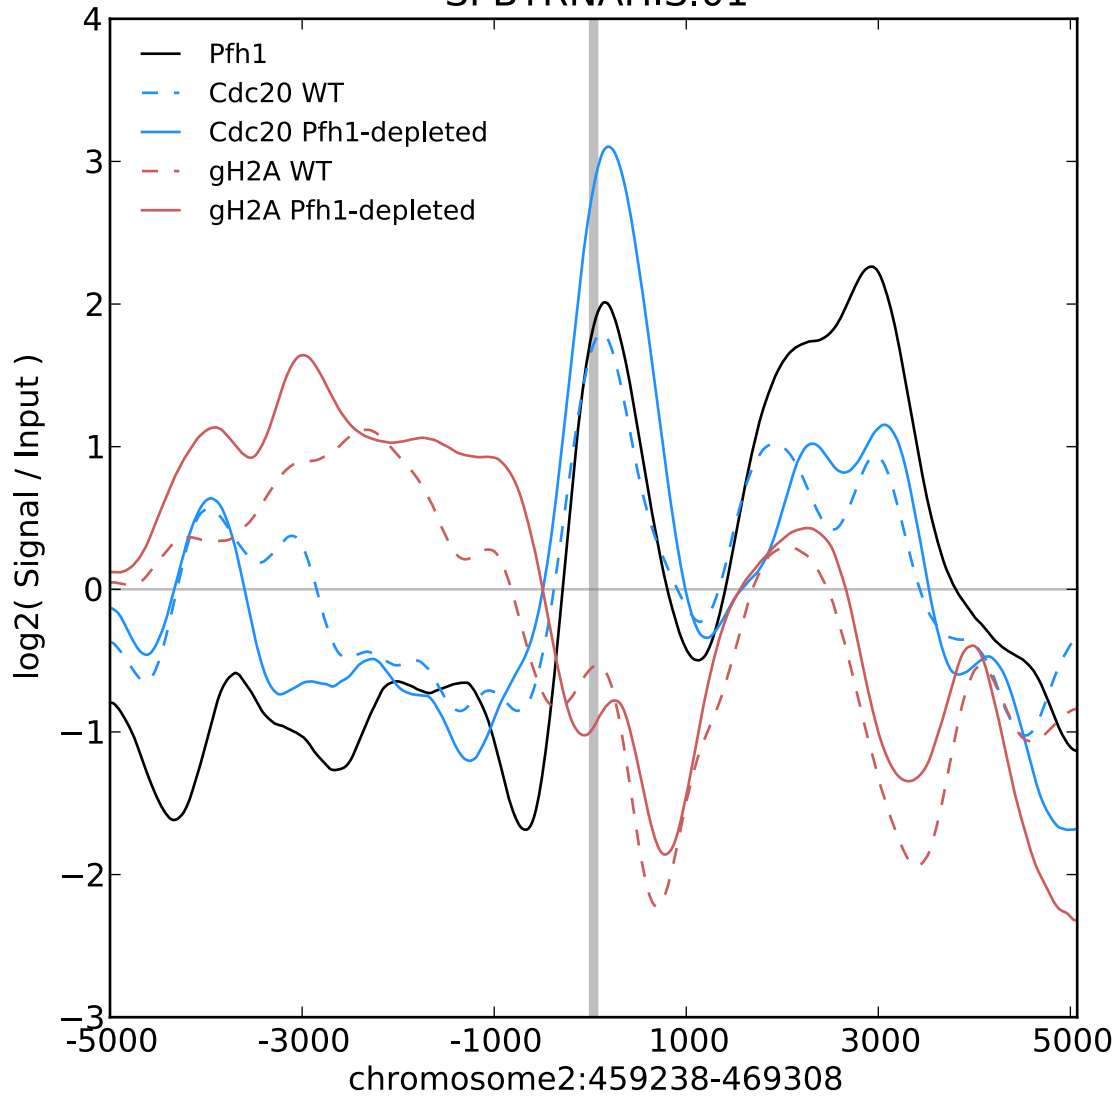

# SPBTRNAHIS.02

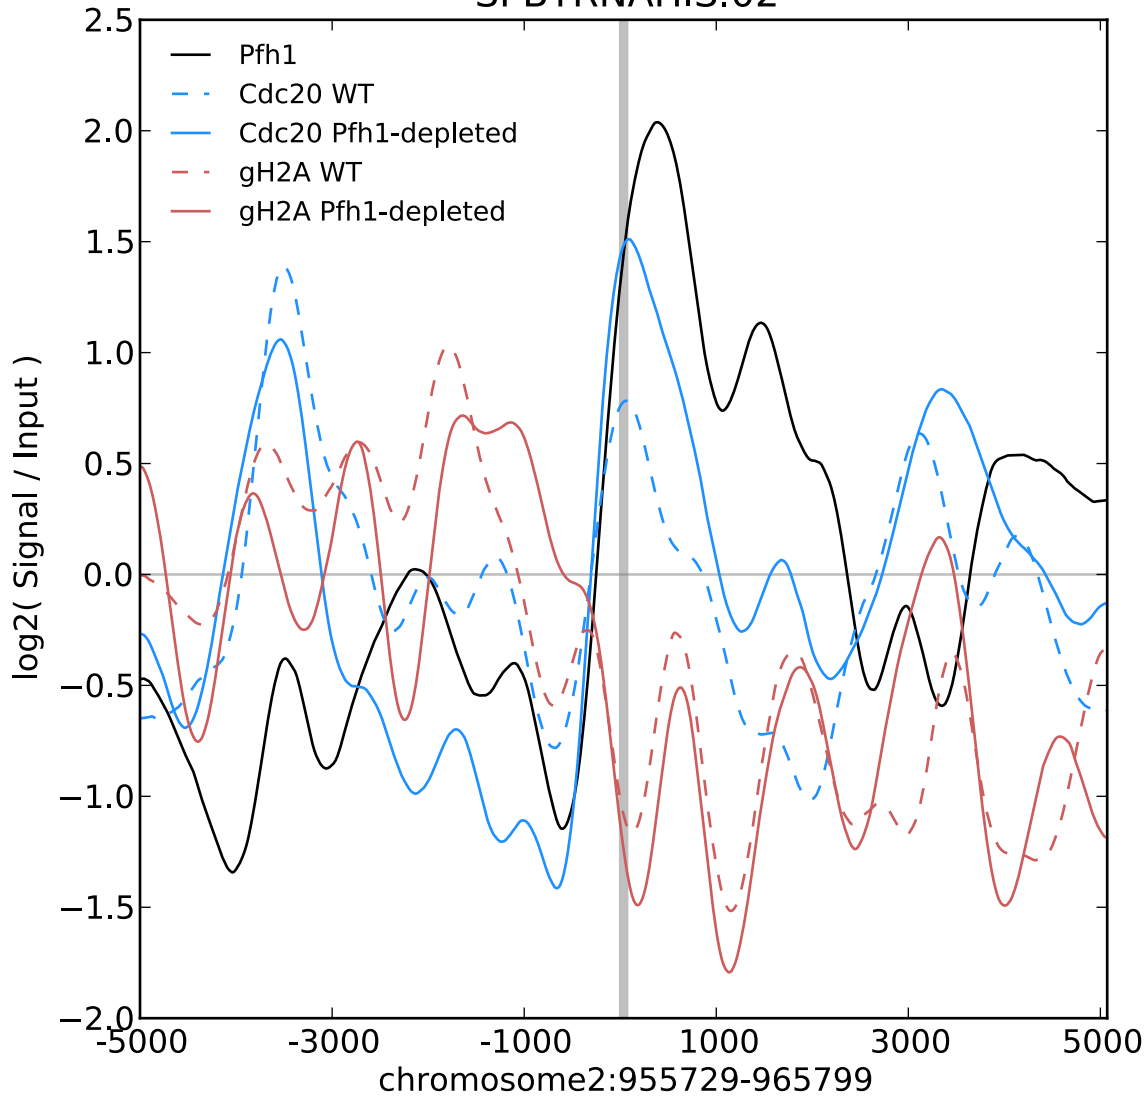

# SPBTRNAILE.05

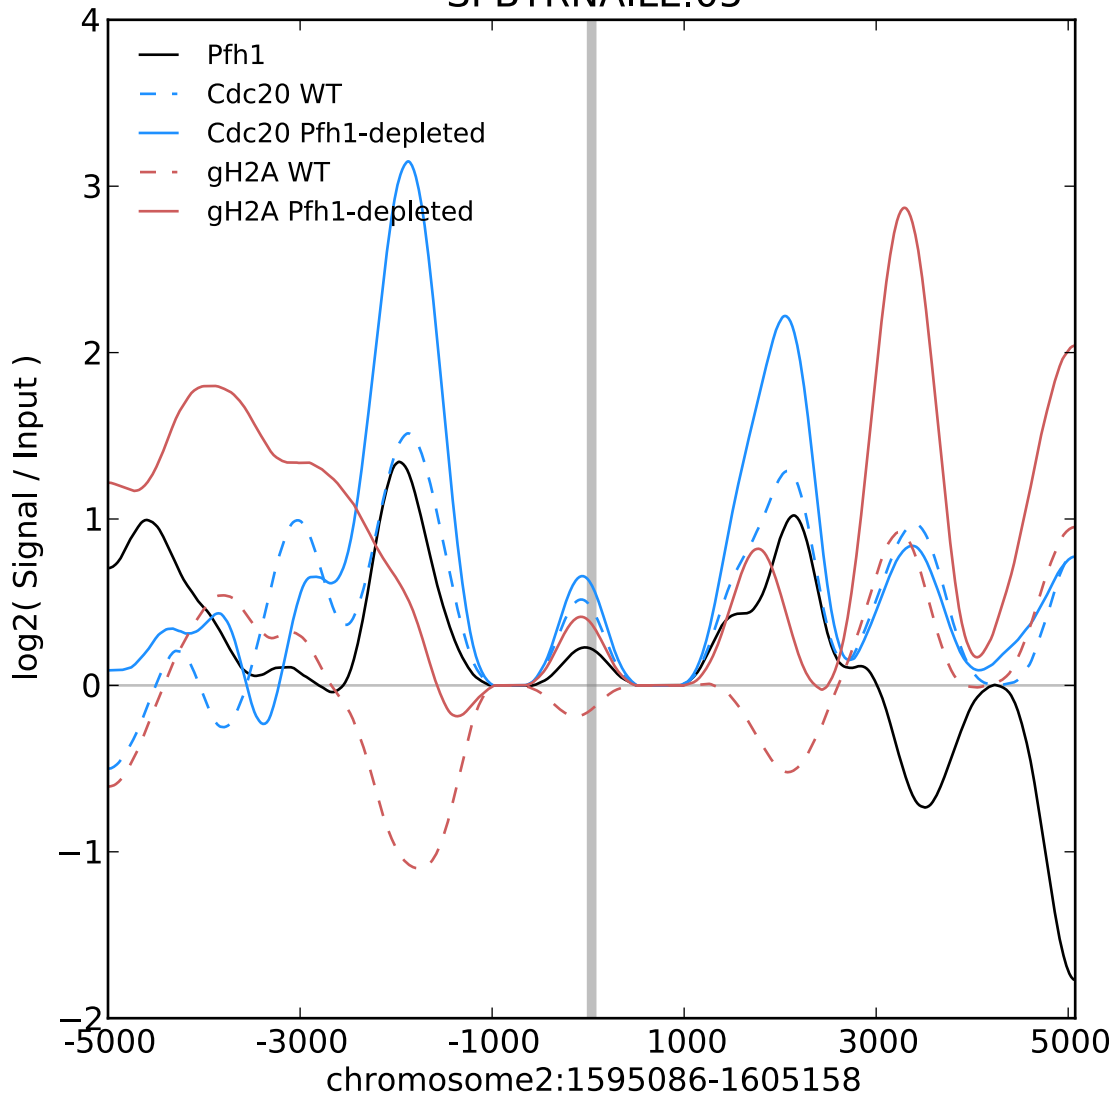

# SPBTRNAILE.06

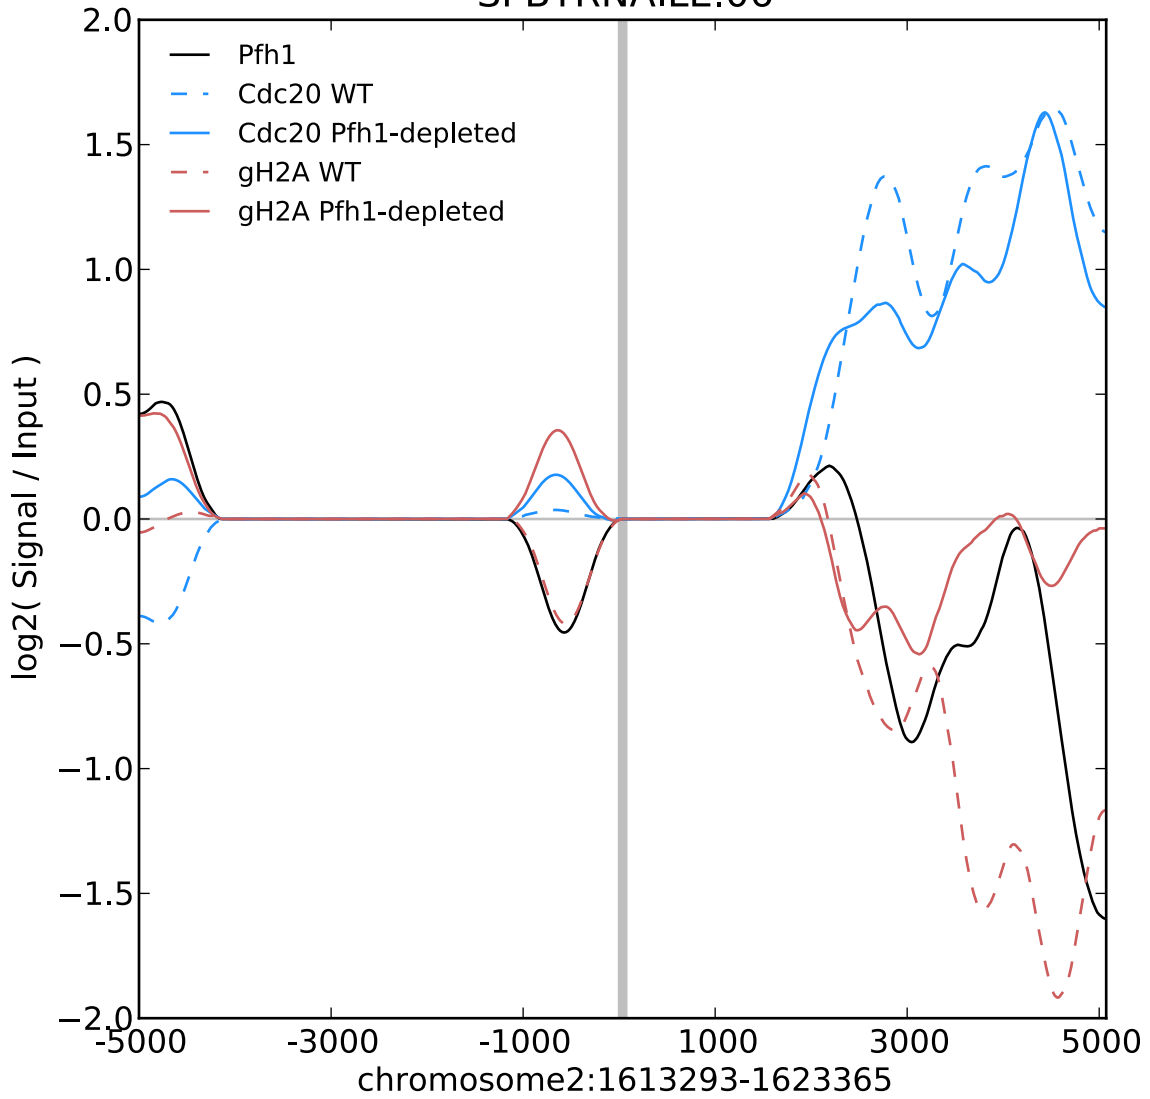

# SPBTRNAILE.07

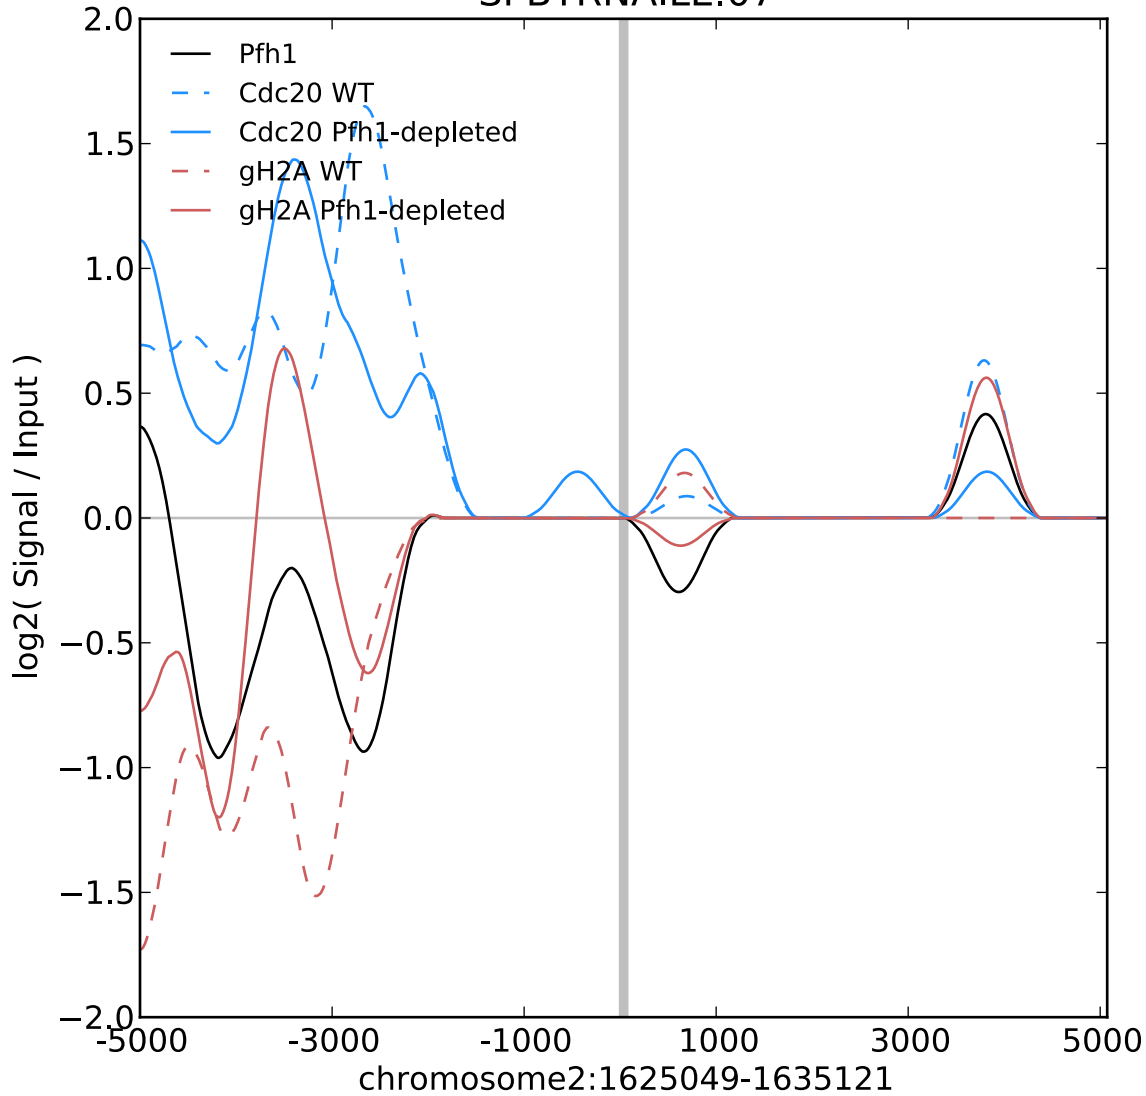

# SPBTRNAILE.08

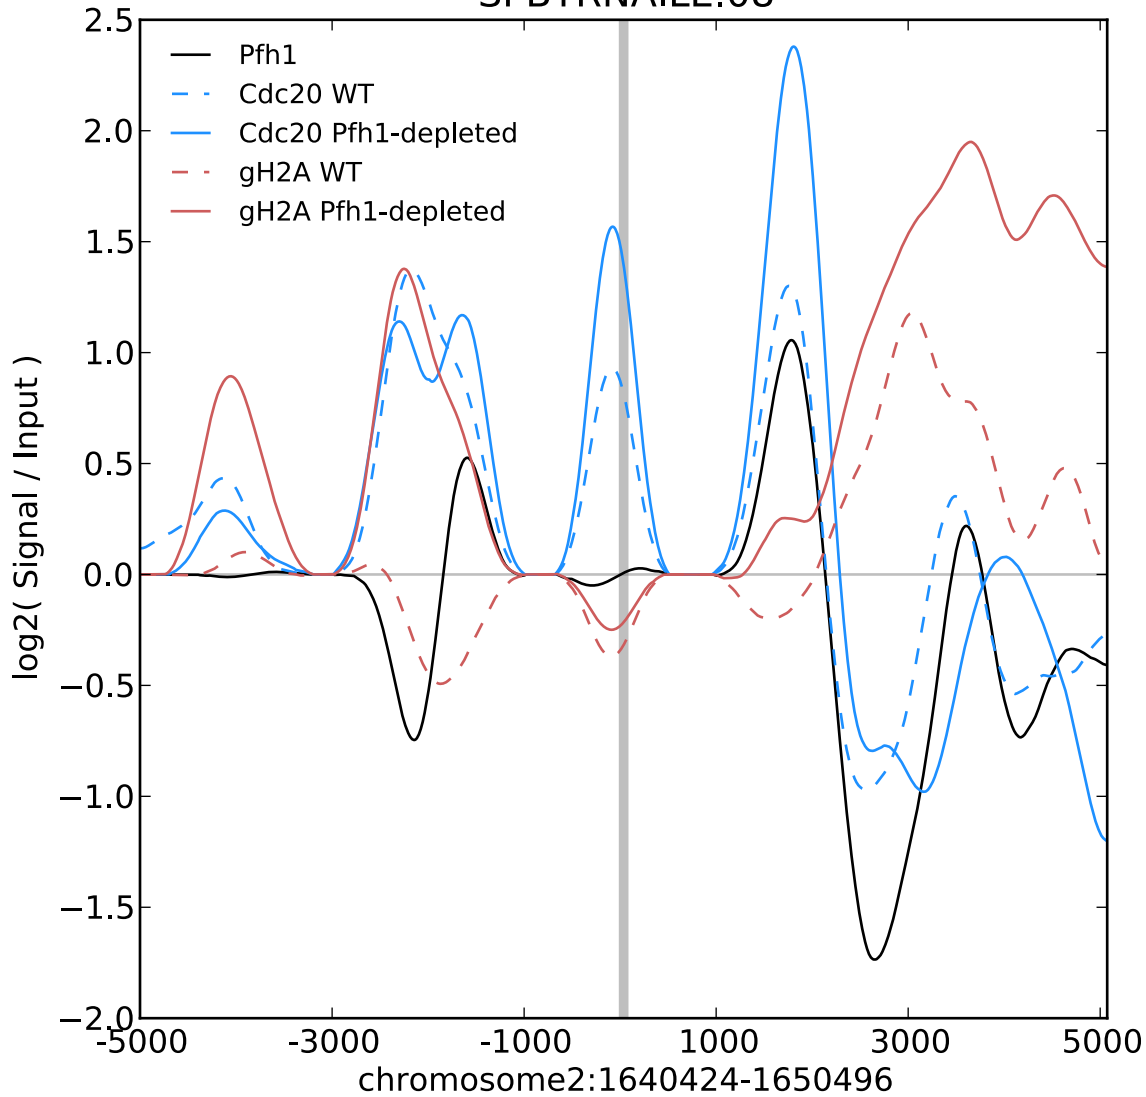



# SPBTRNALEU.05

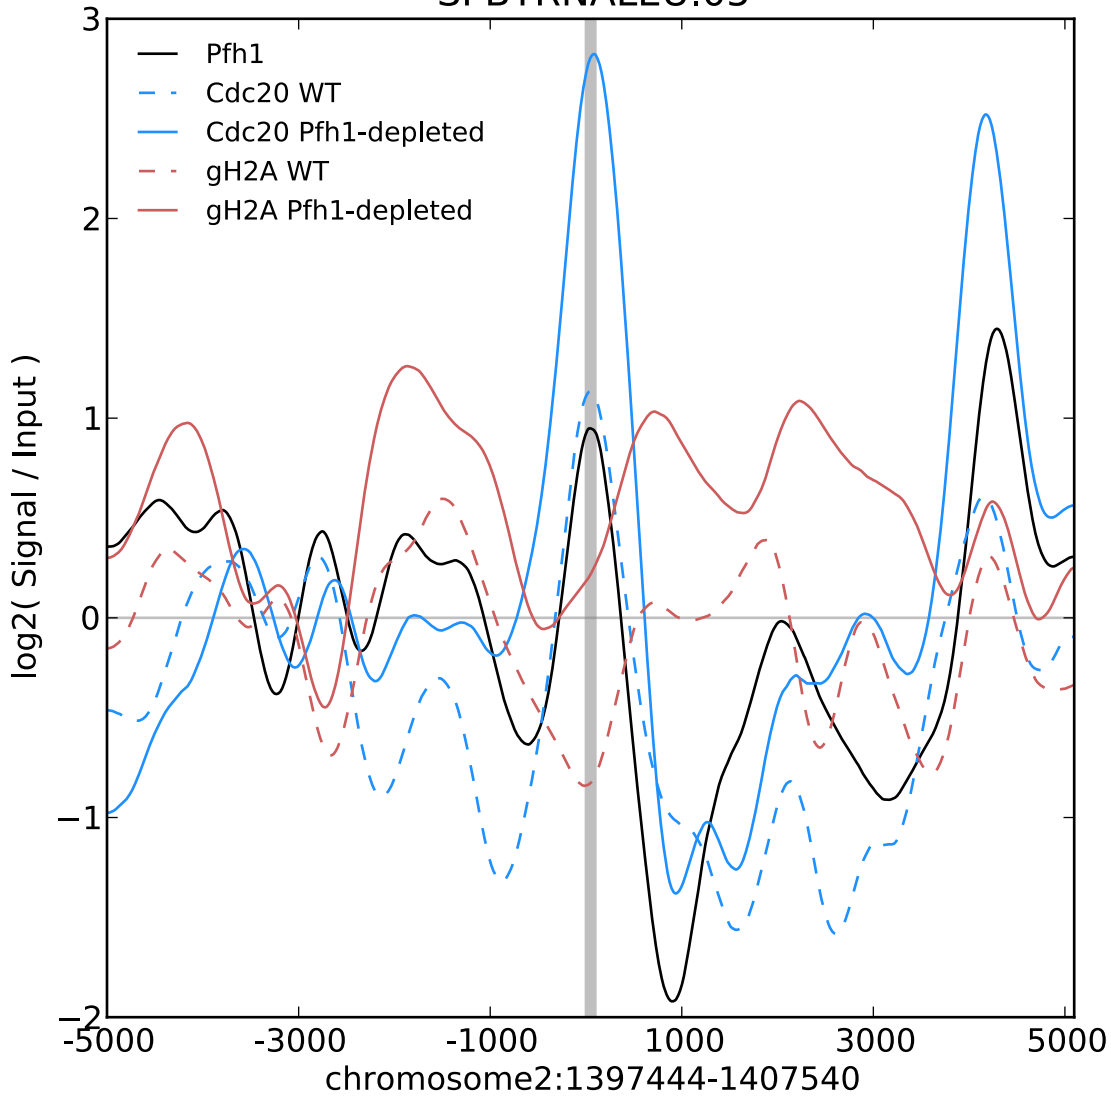

# SPBTRNALEU.06

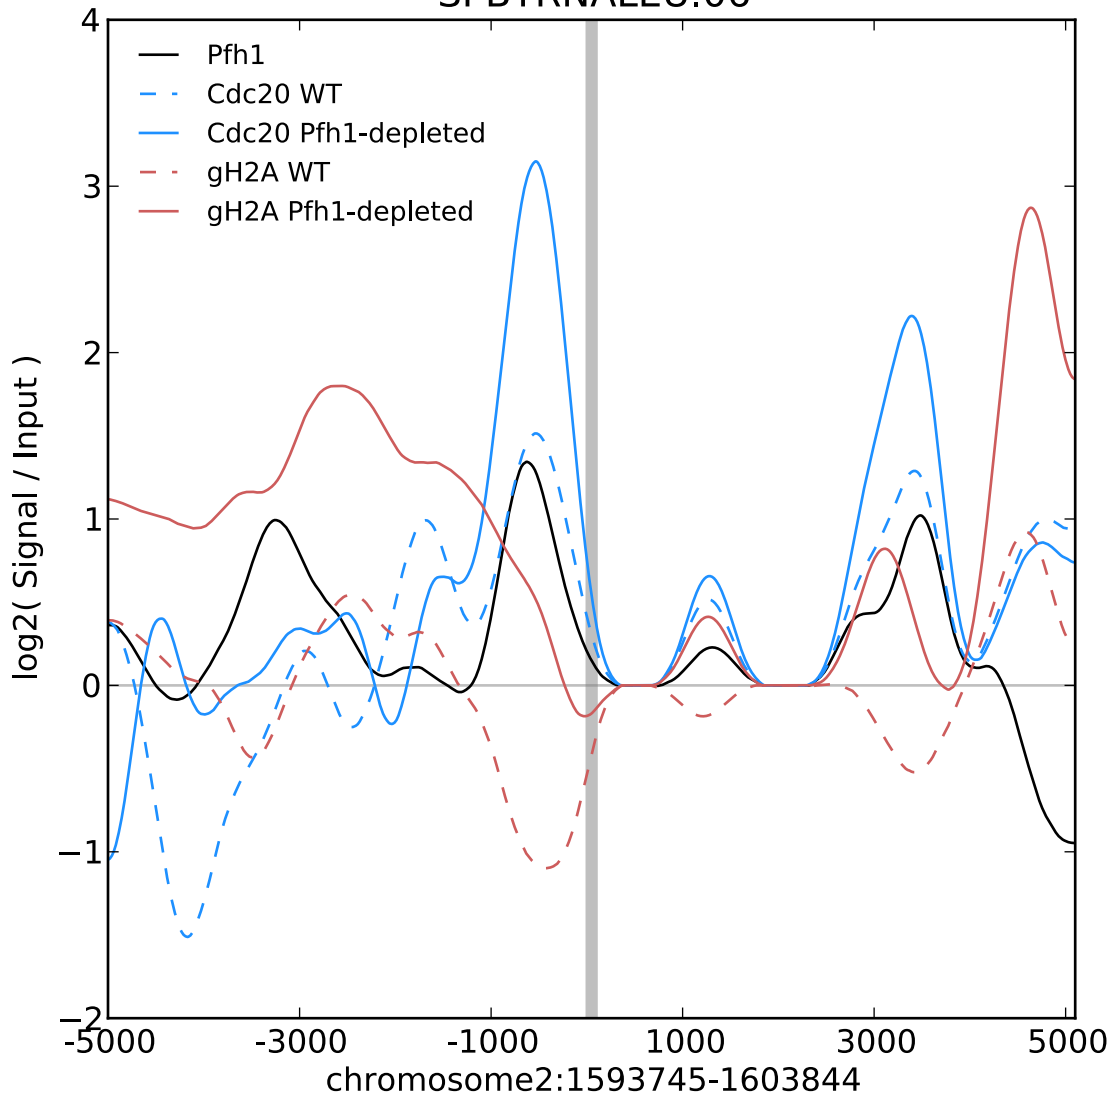

# SPBTRNALEU.07

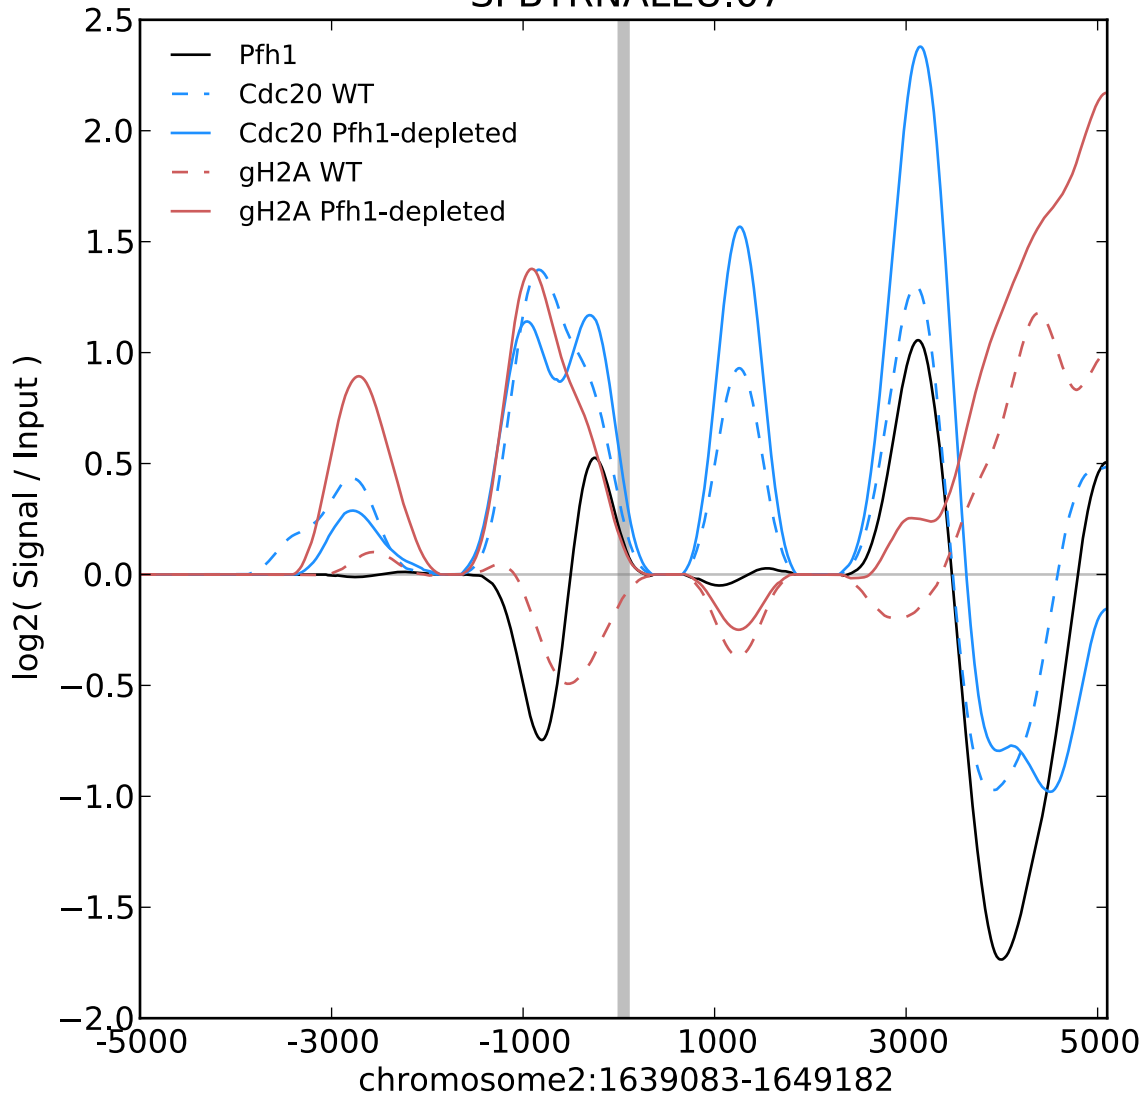

# SPBTRNALEU.08

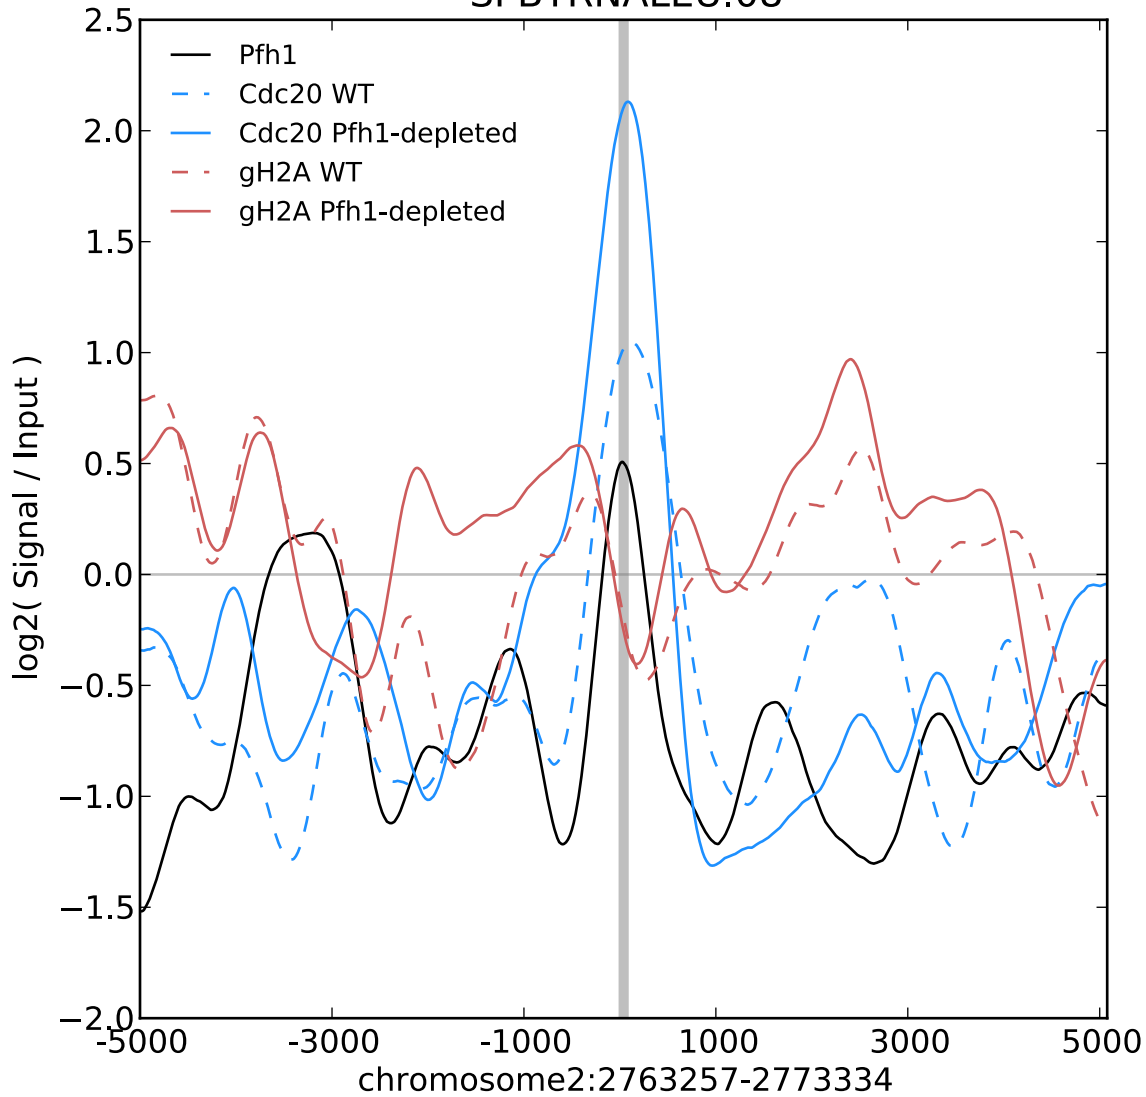

# SPBTRNALEU.09

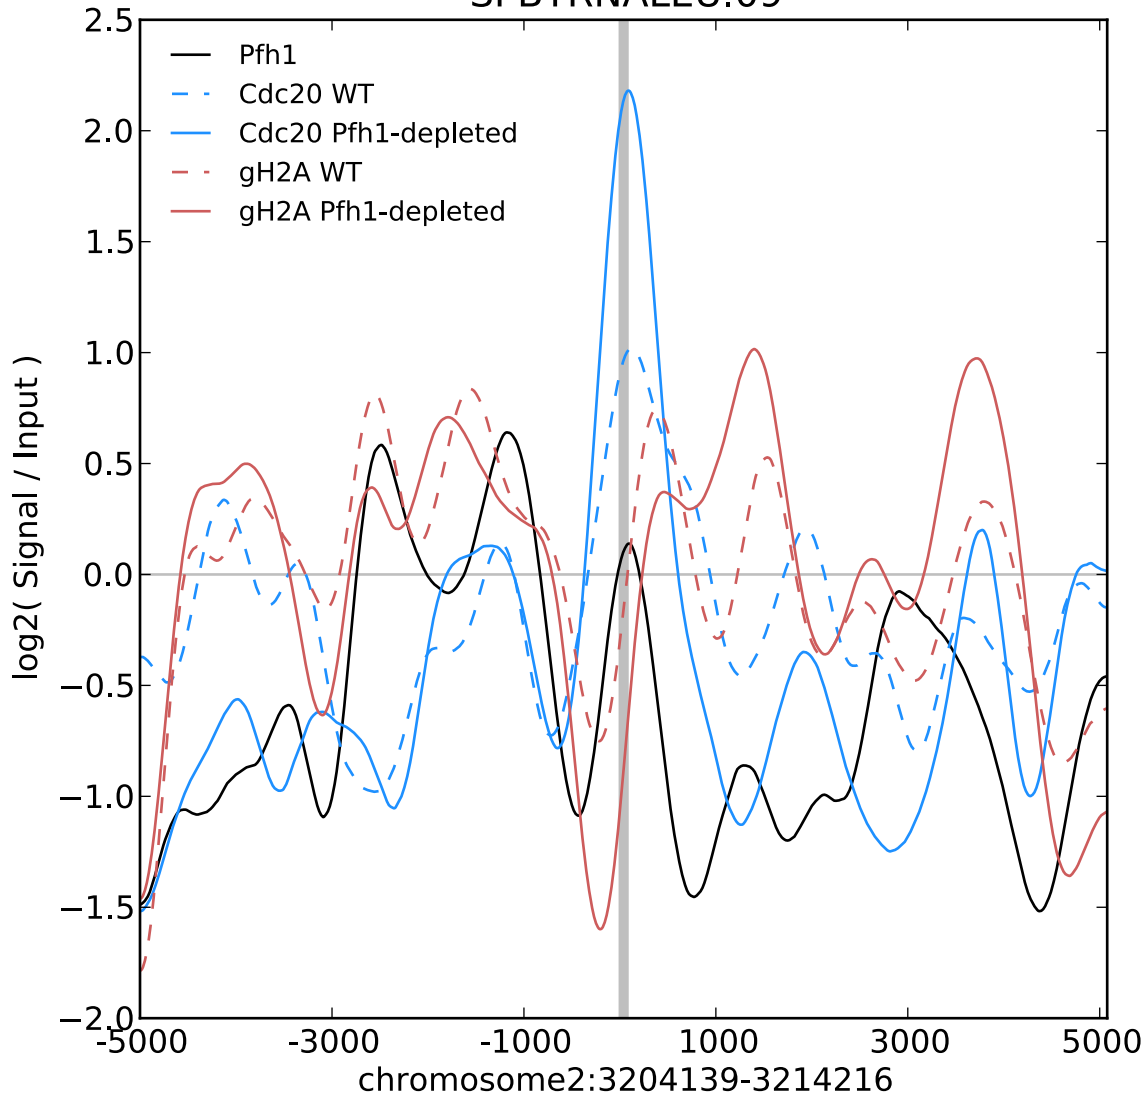

# SPBTRNALEU.10

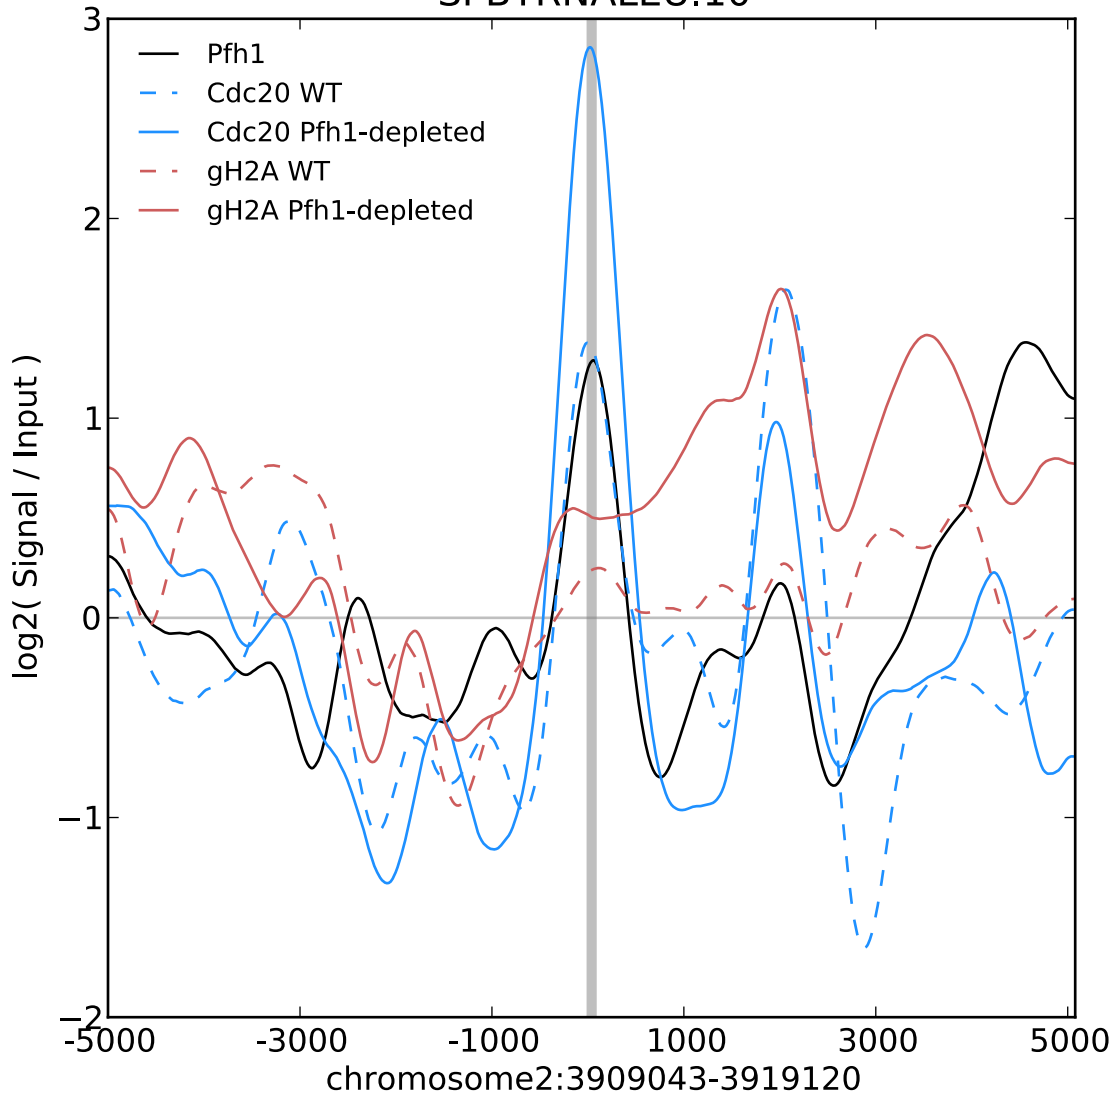

# SPBTRNALS.06

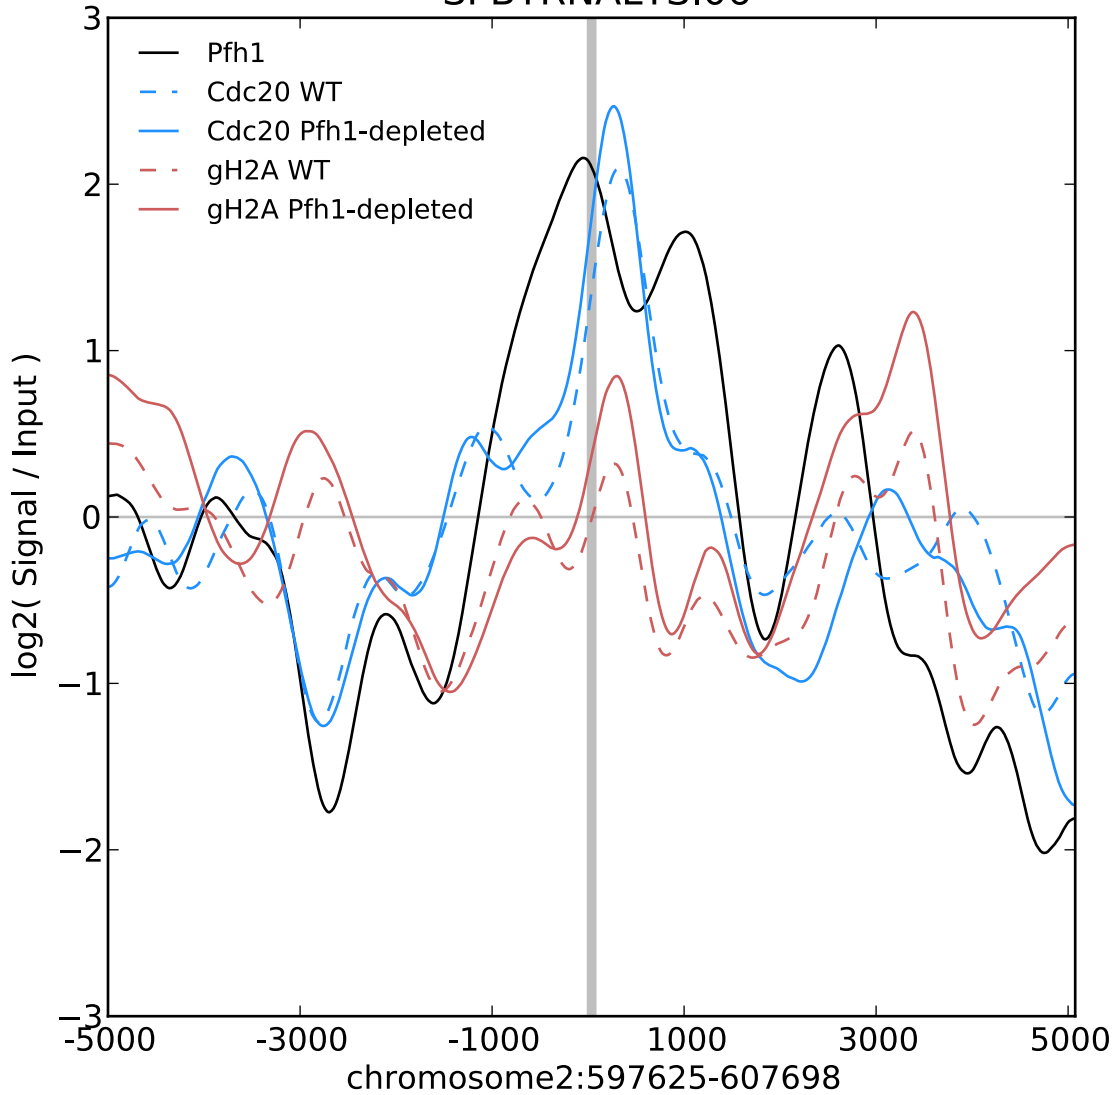

# SPBTRNALS.07

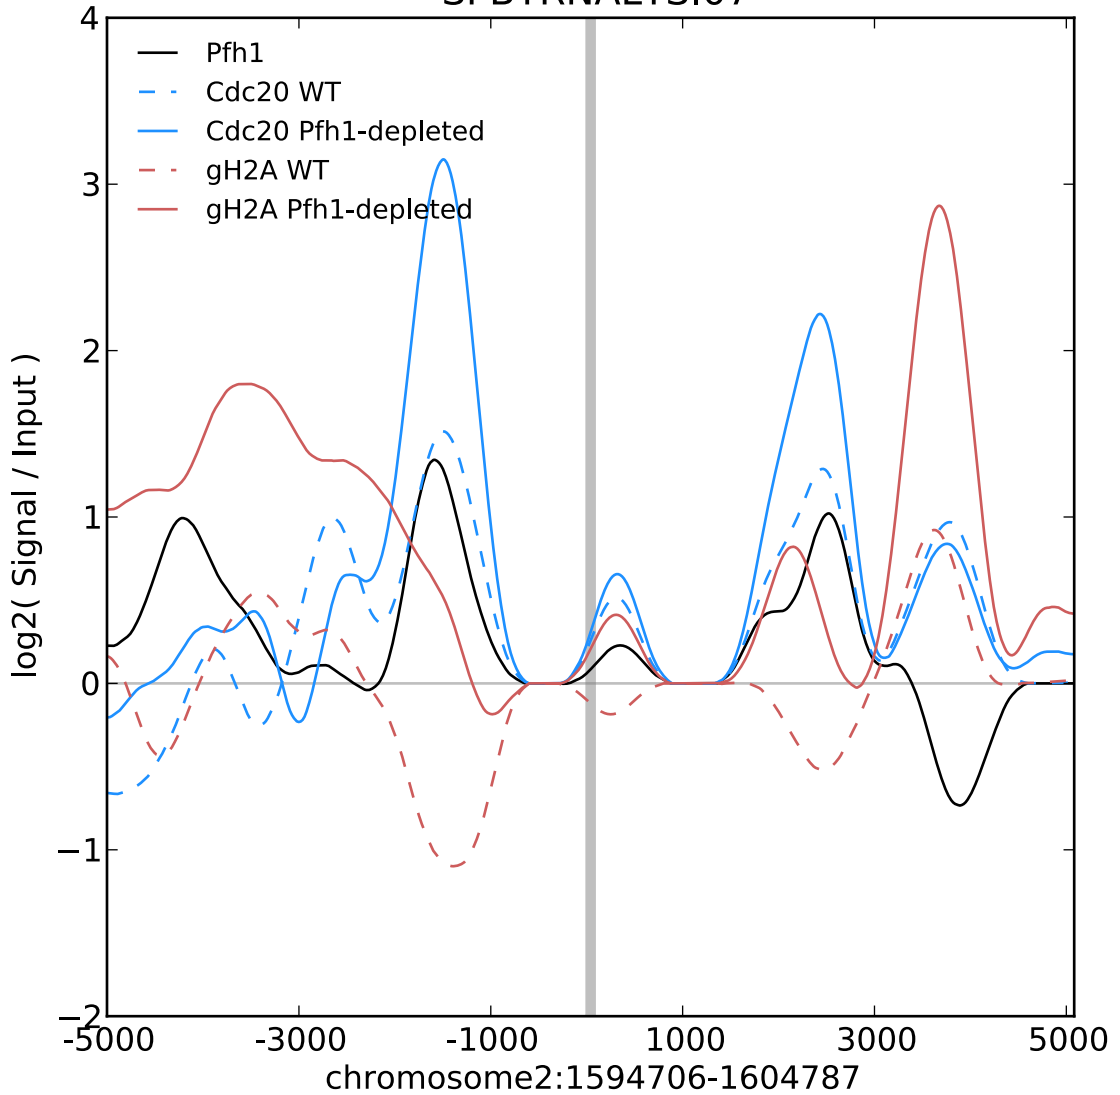



# SPBTRNALS.08

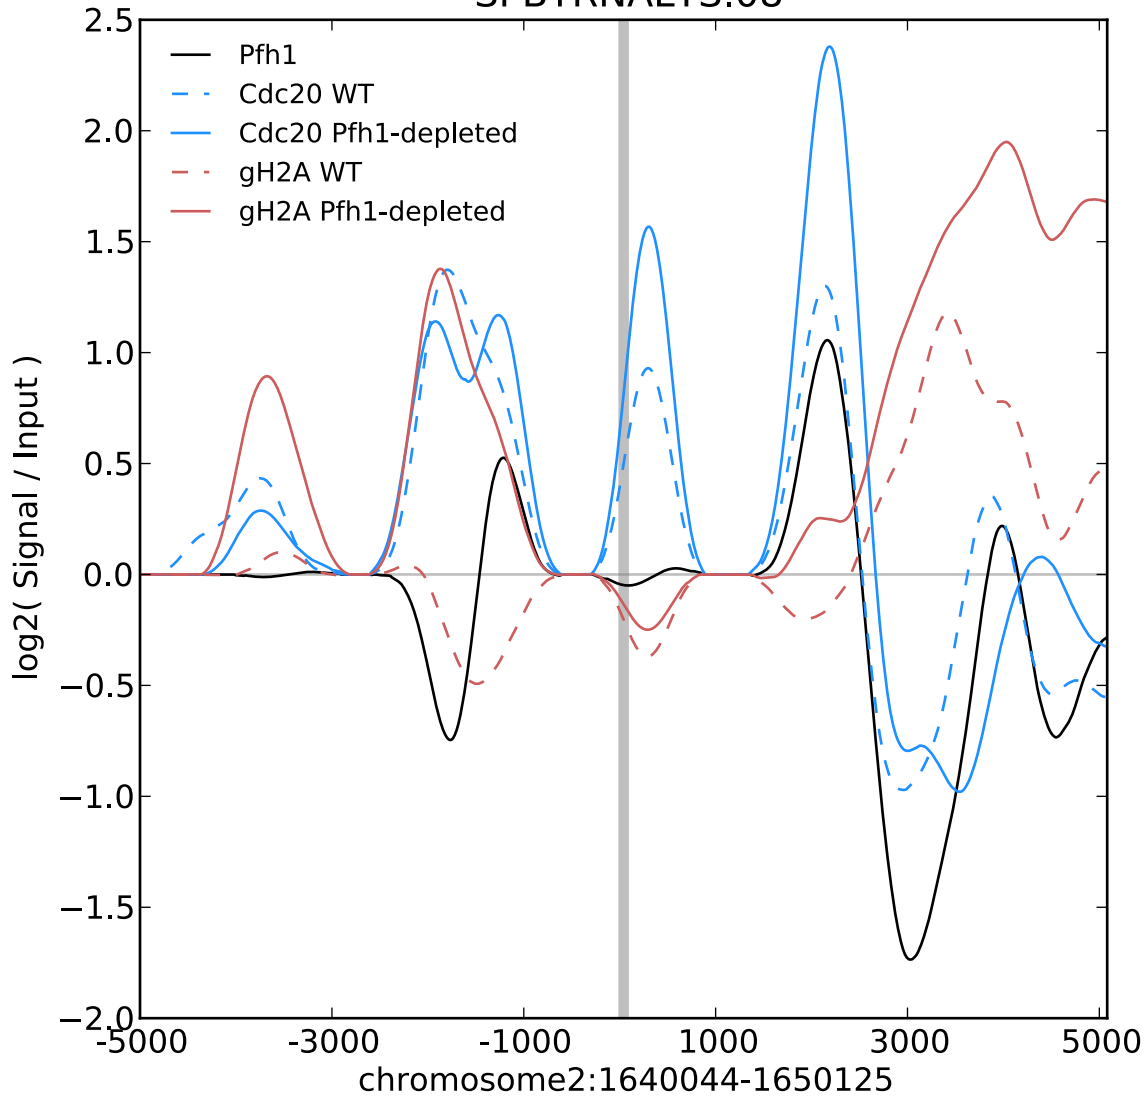

# SPBTRNALS.09

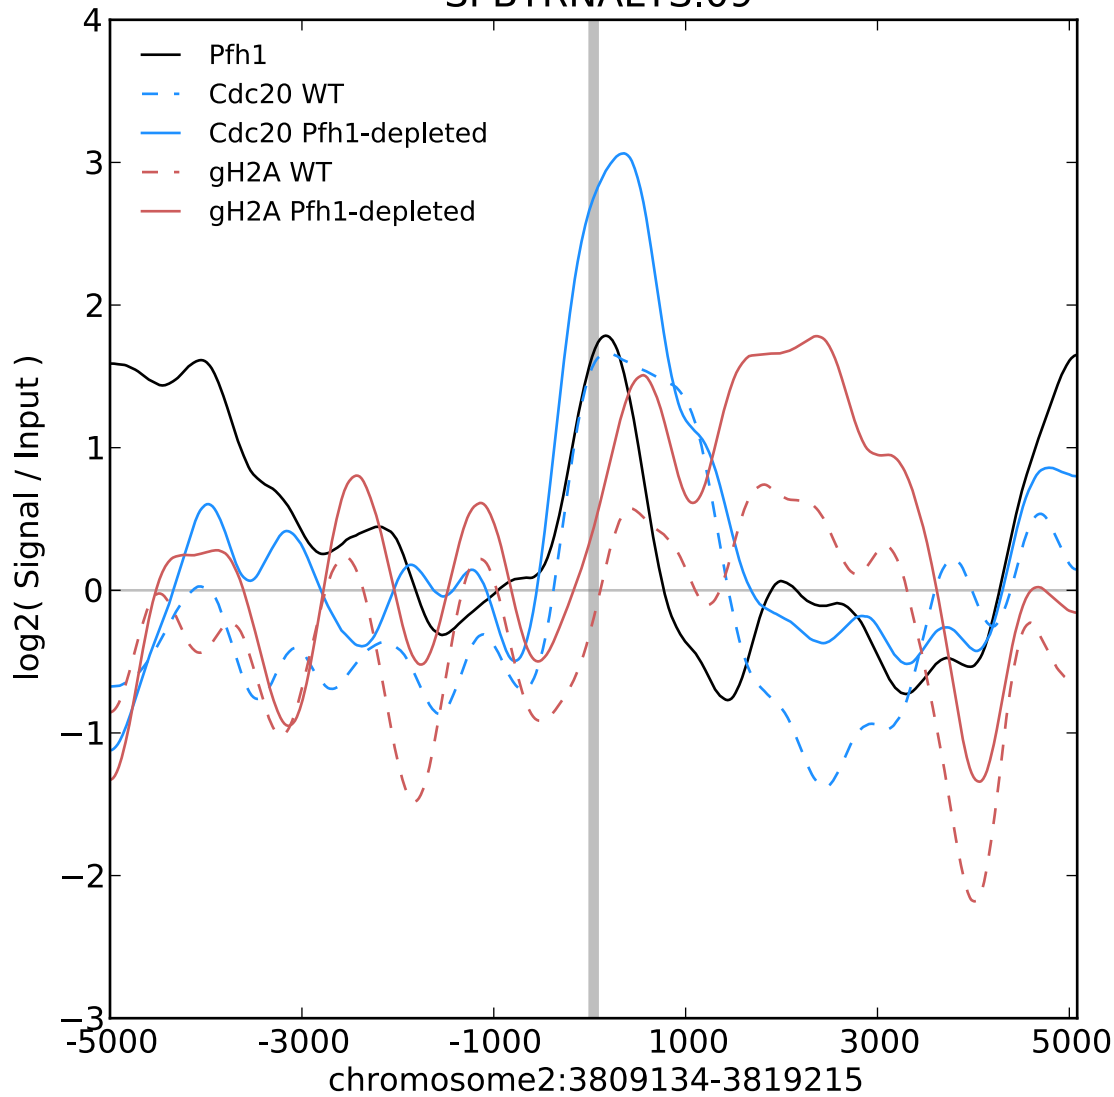

# SPBTRNAMET.04

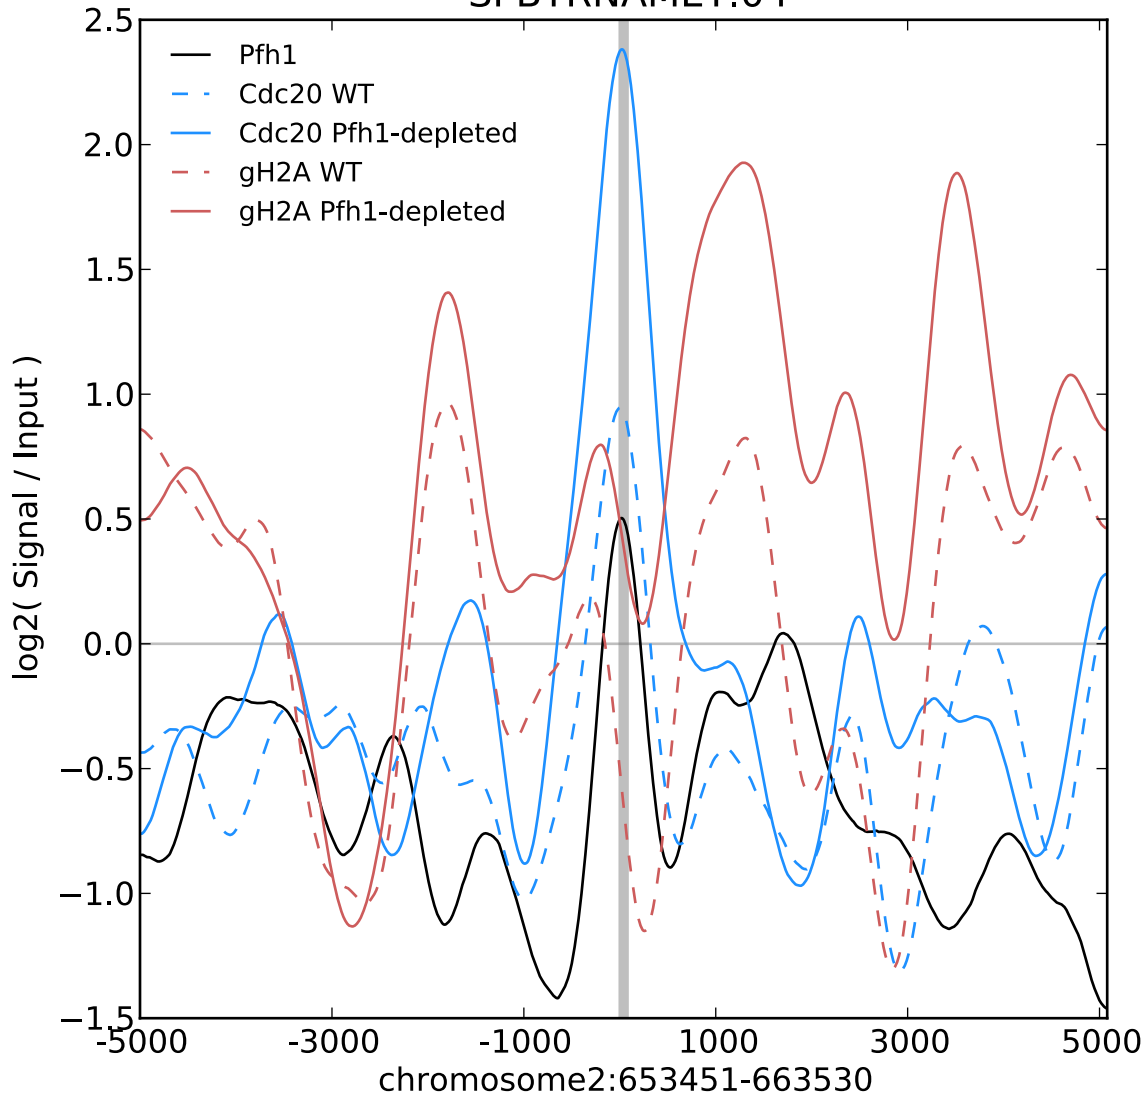

# SPBTRNAMET.05

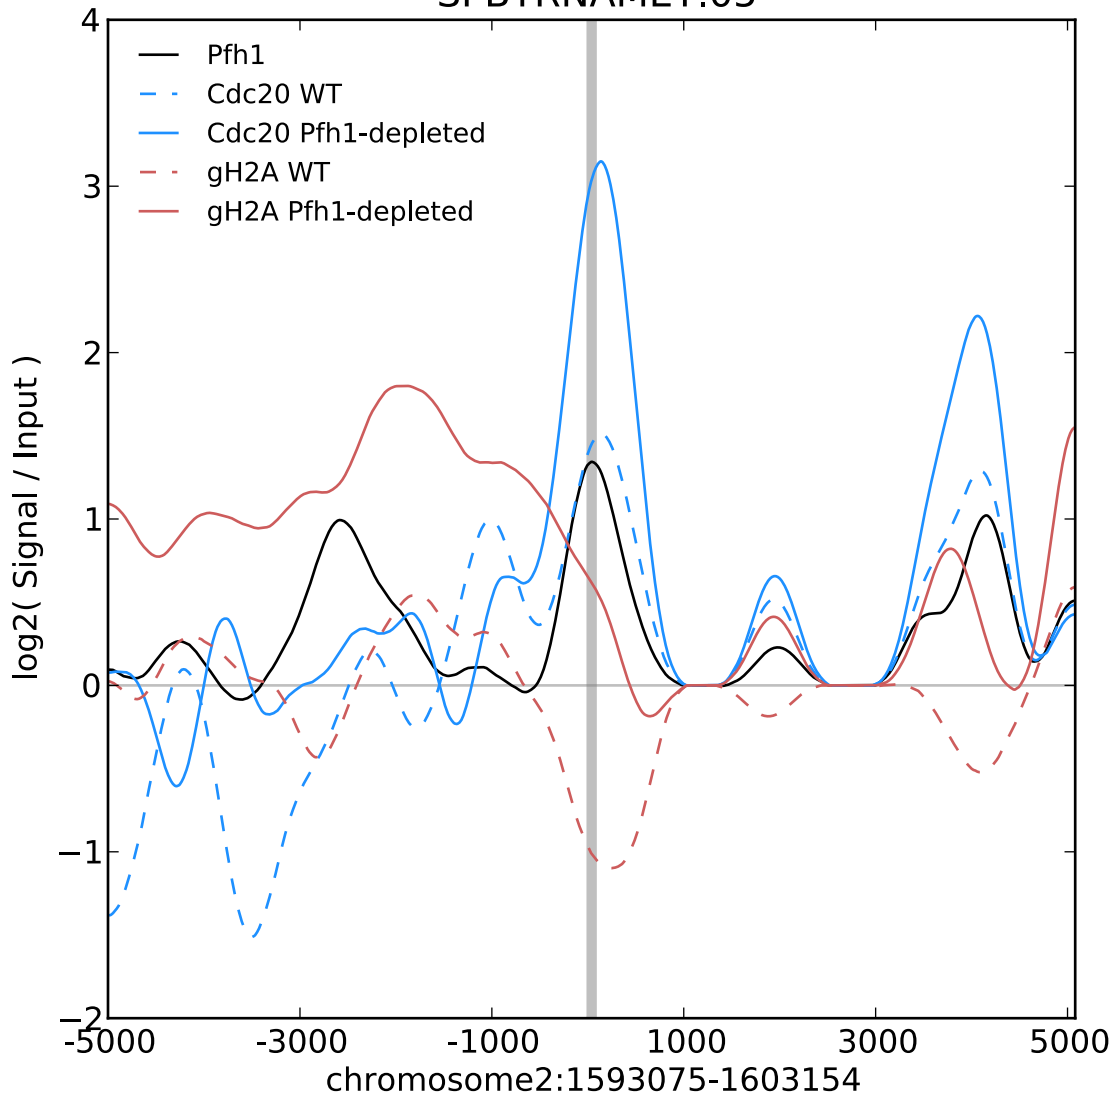

# SPBTRNAMET.06

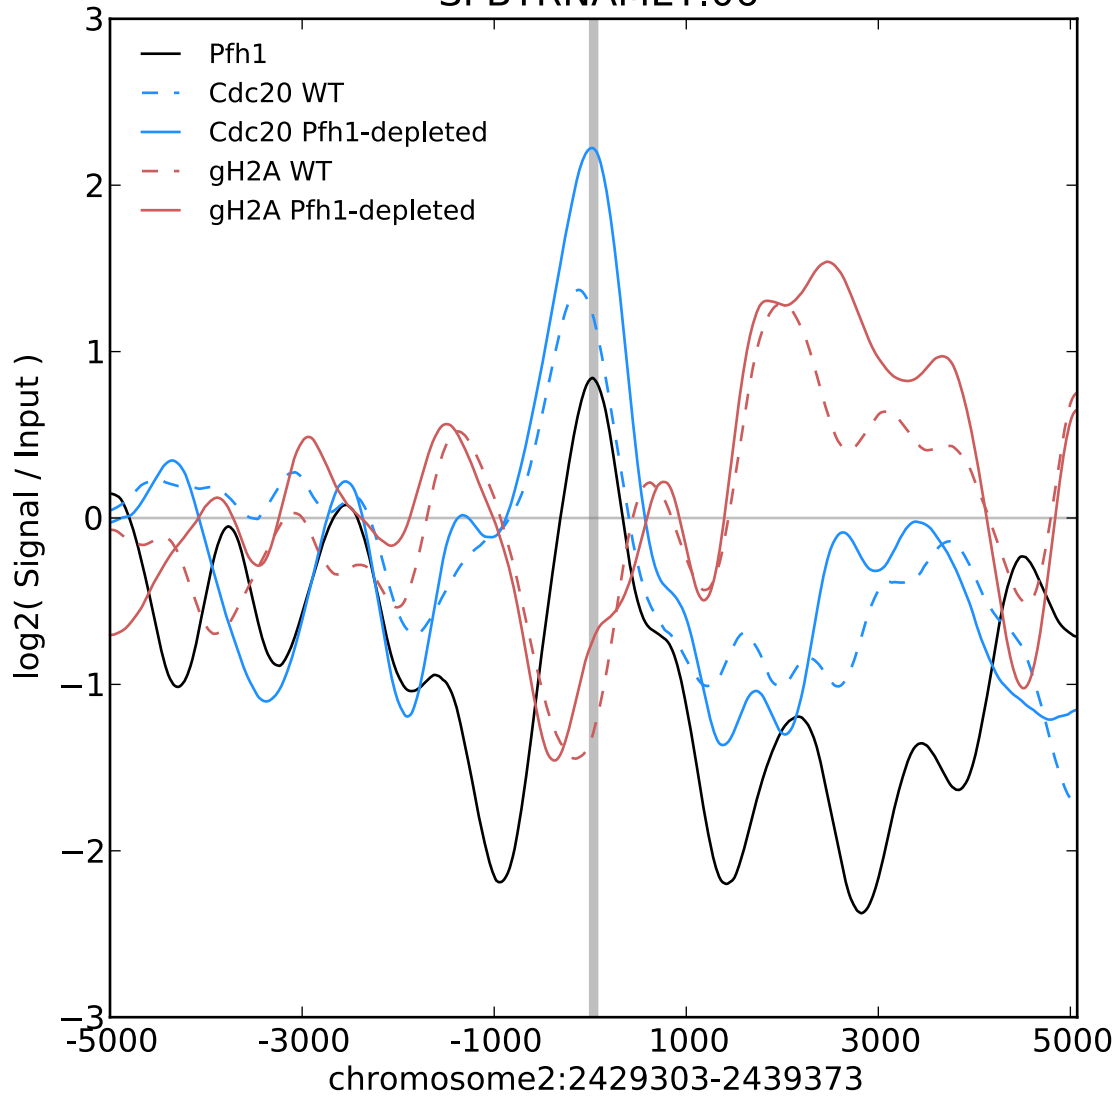

# SPBTRNAPHE.03

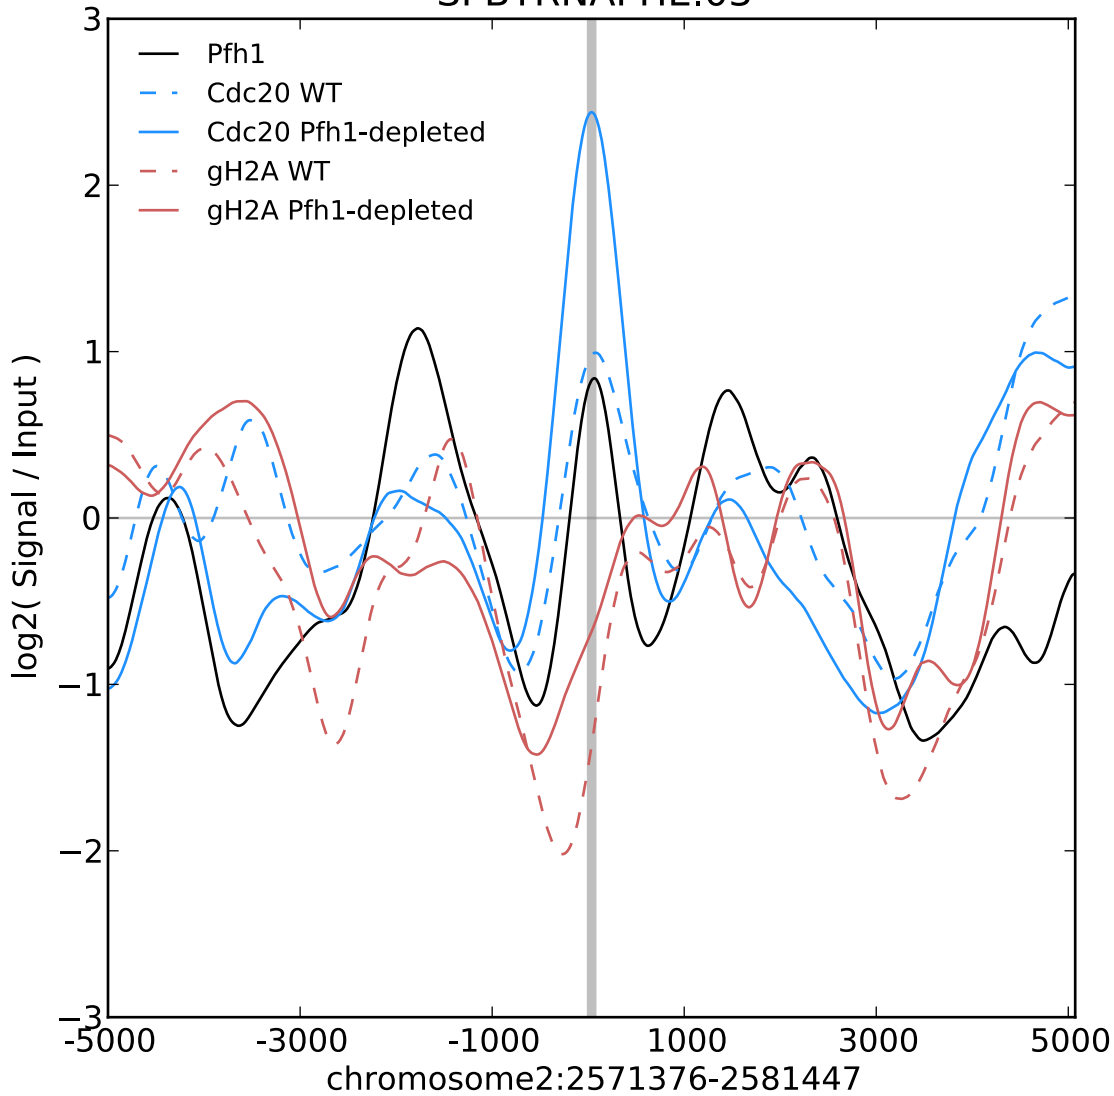

# SPBTRNAPRO.04

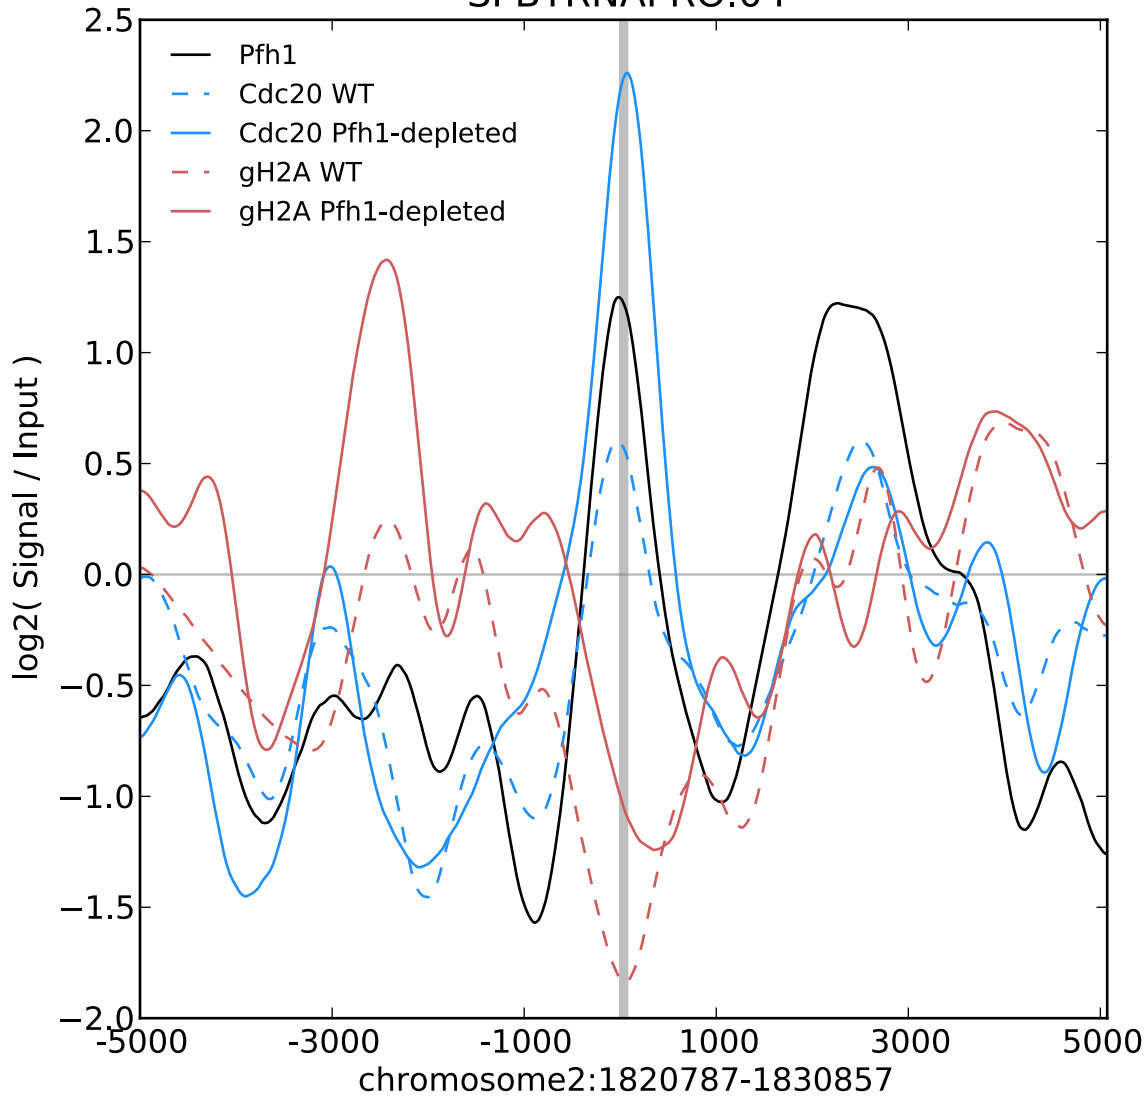

# SPBTRNAPRO.05

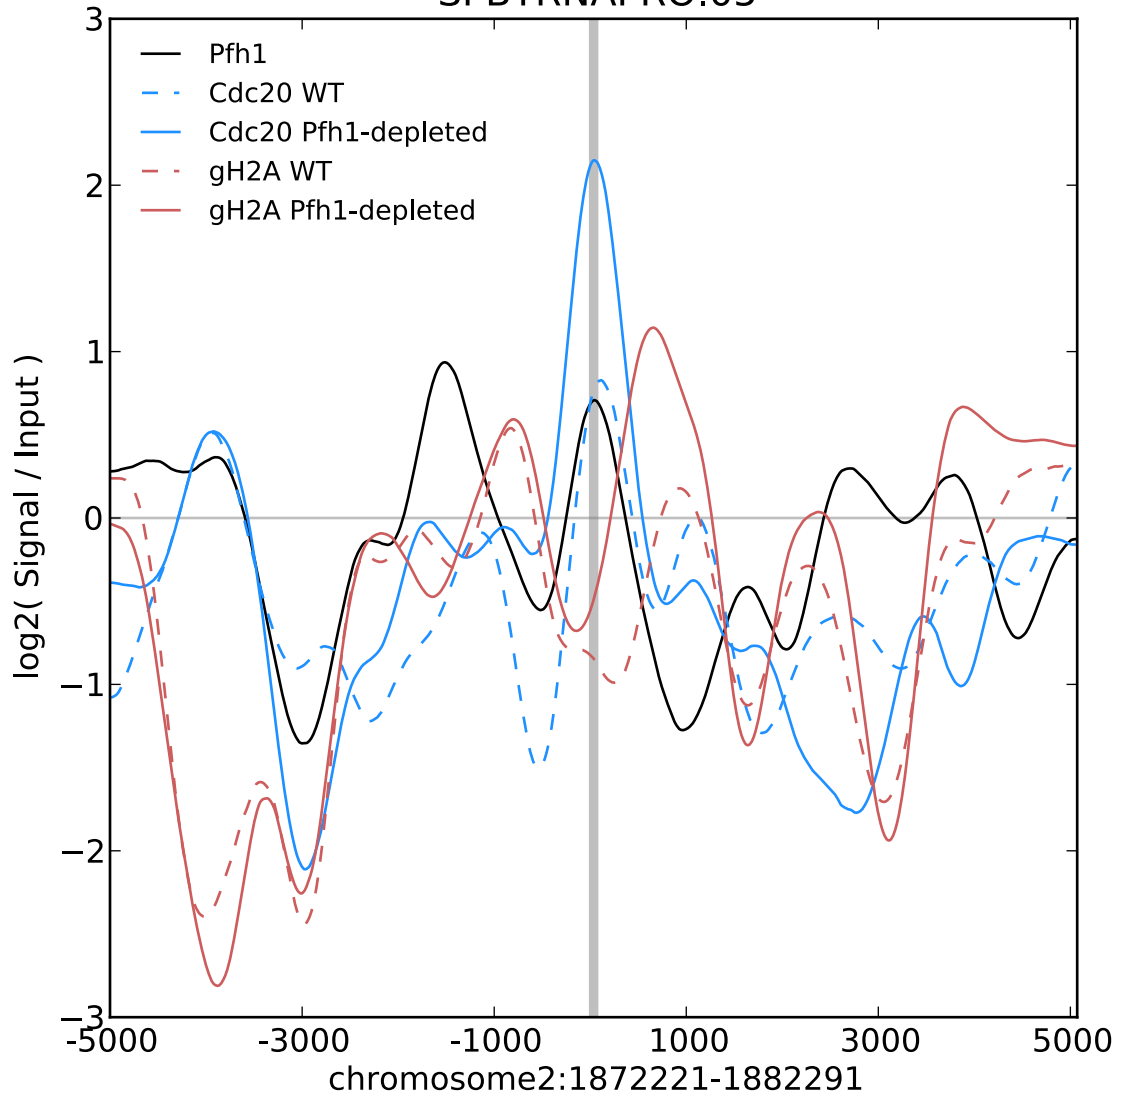



# SPBTRNAPRO.06

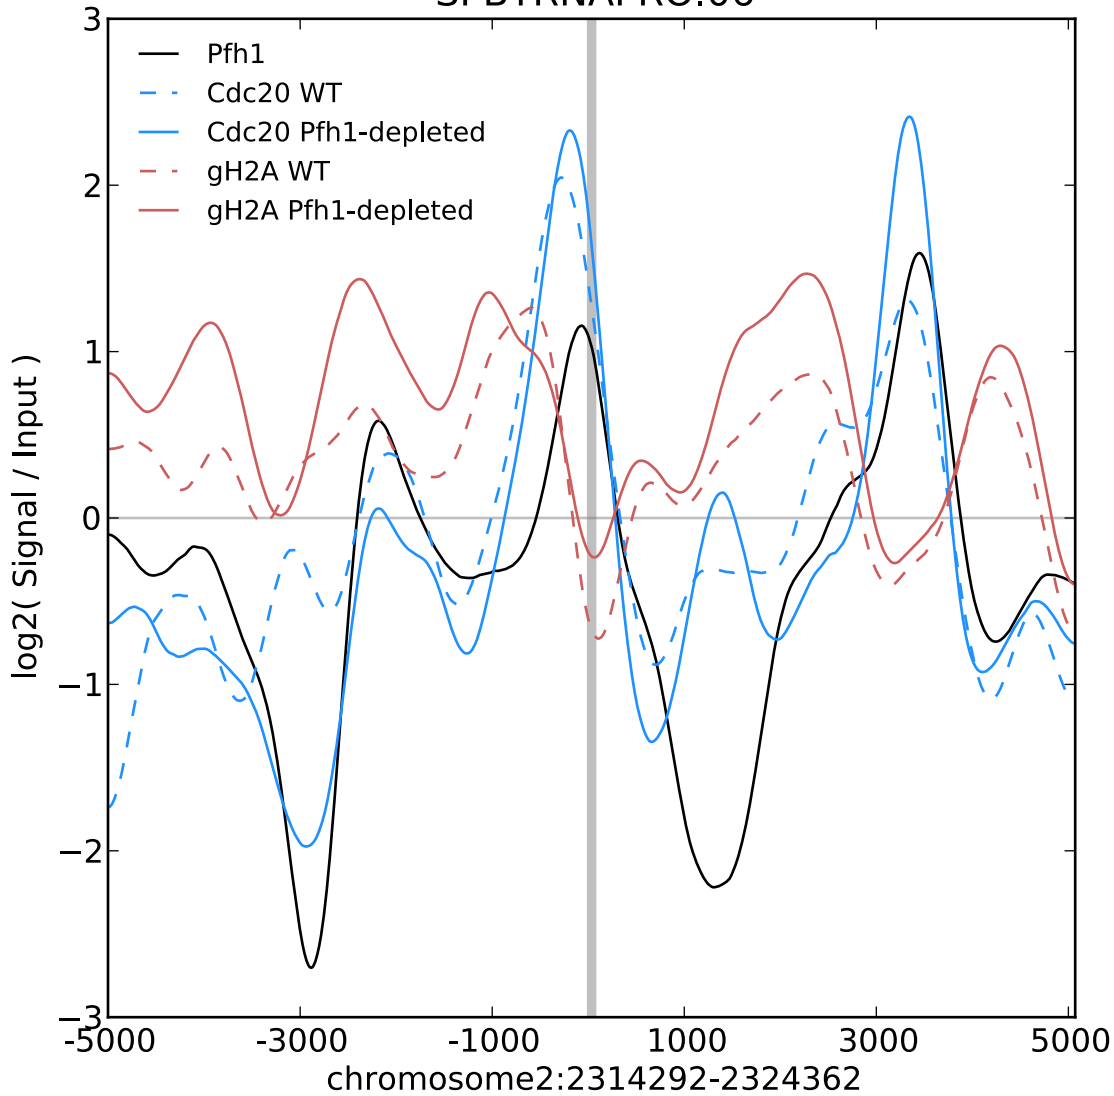

# SPBTRNAPRO.07

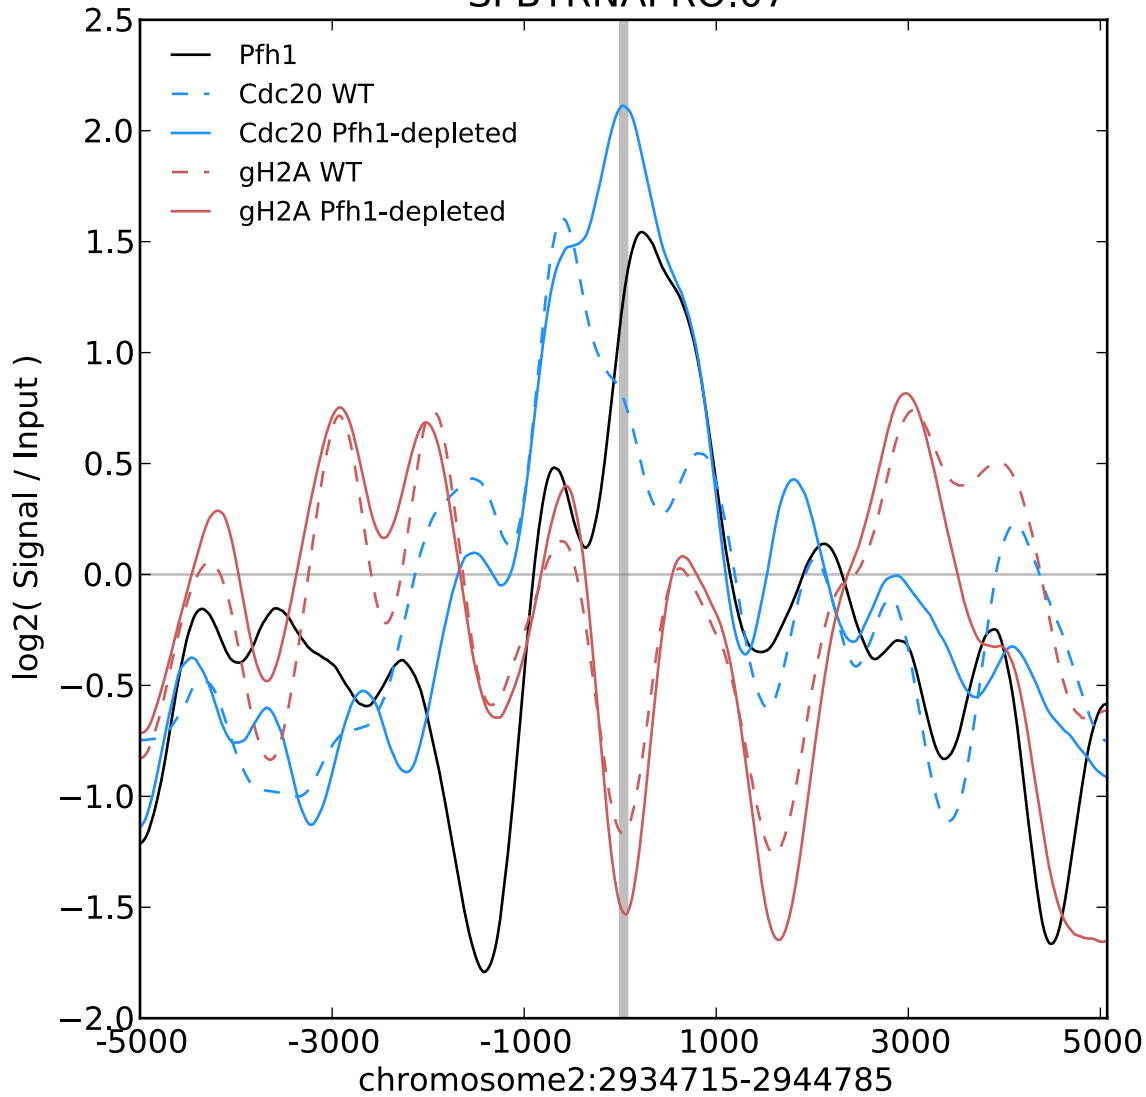

# SPBTRNAPRO.08

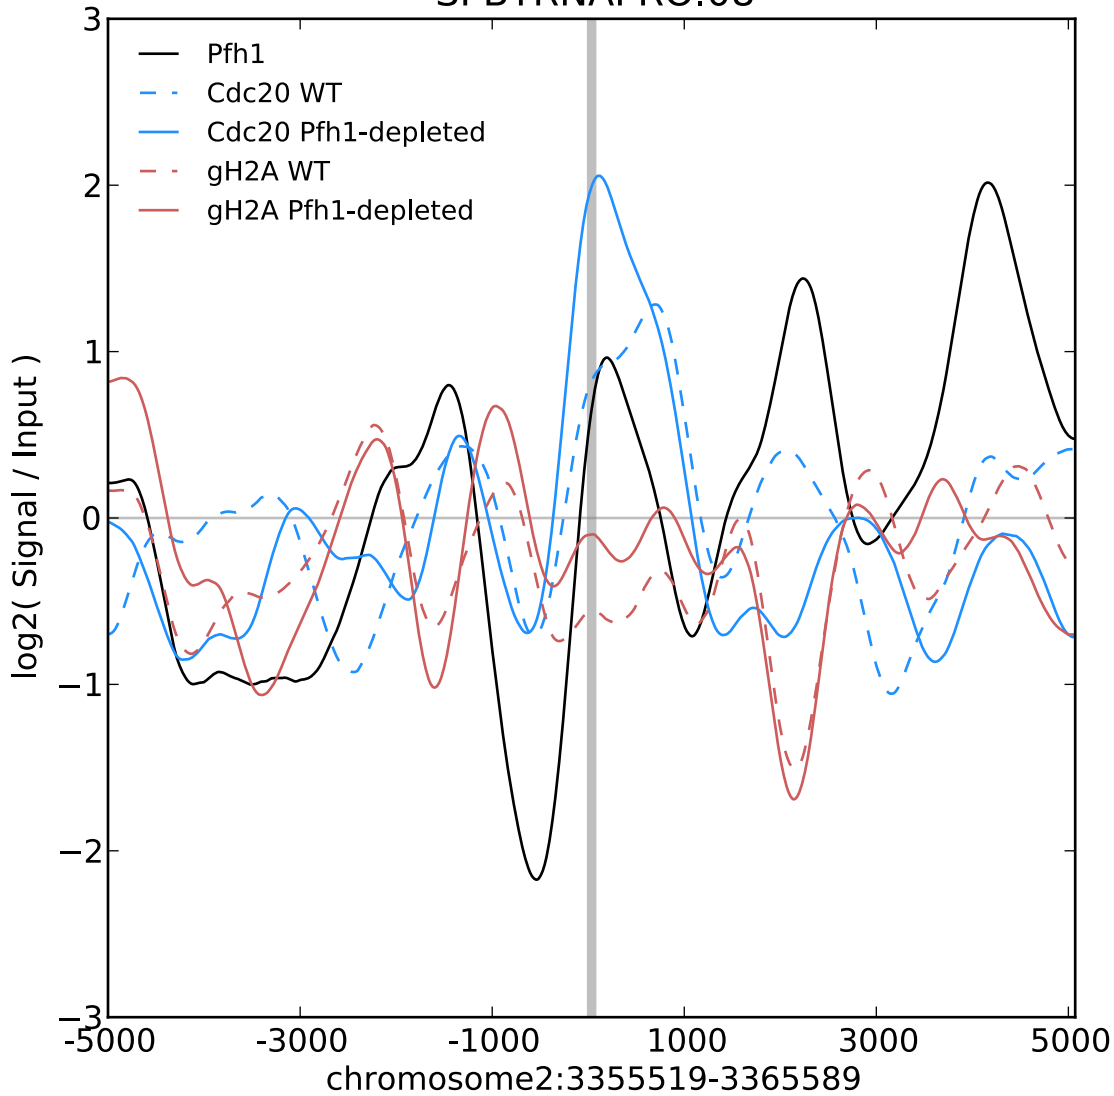

# SPBTRNASER.05

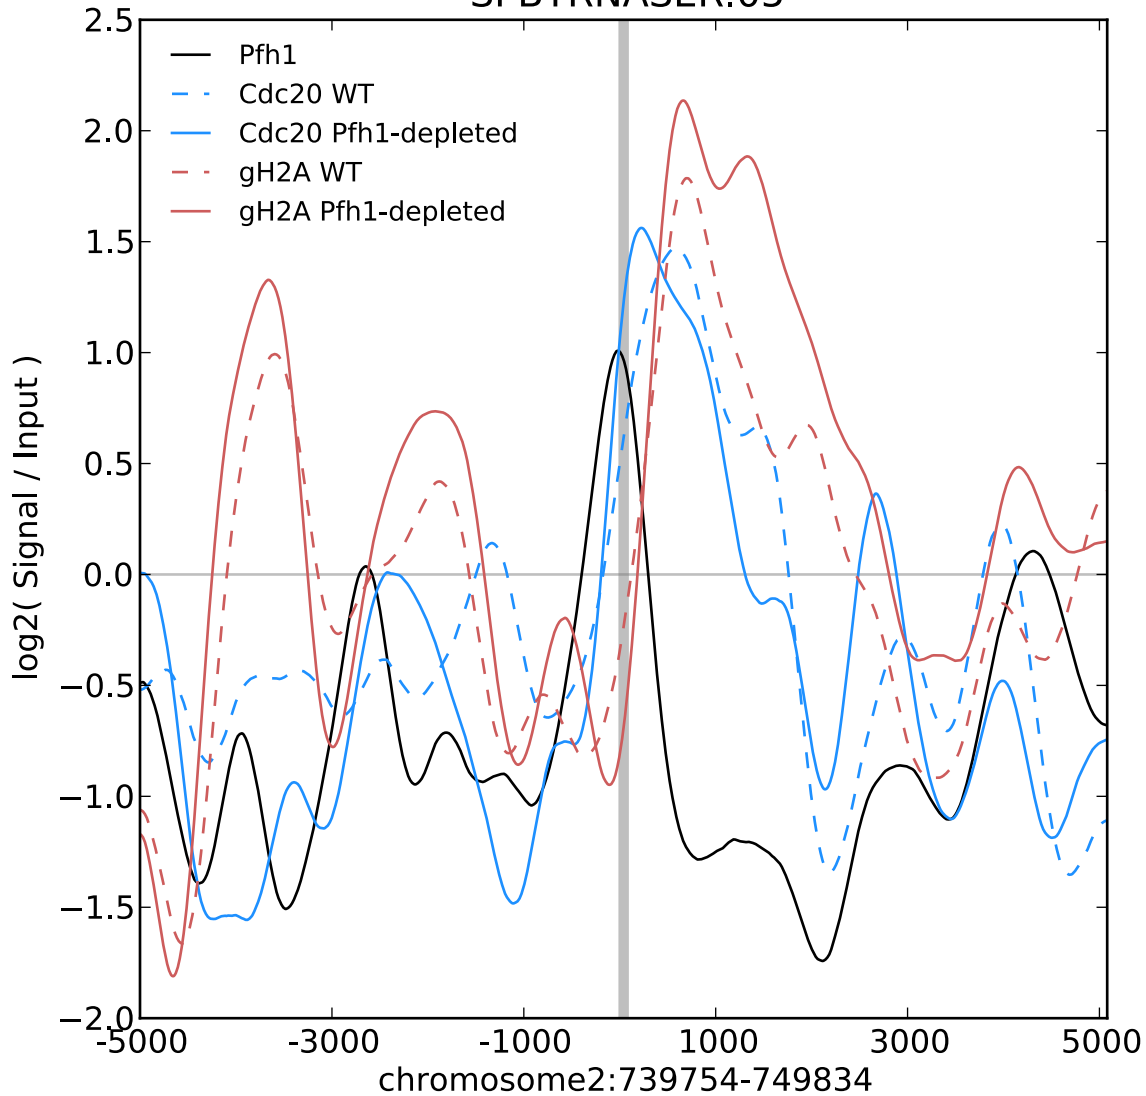

# SPBTRNASER.06

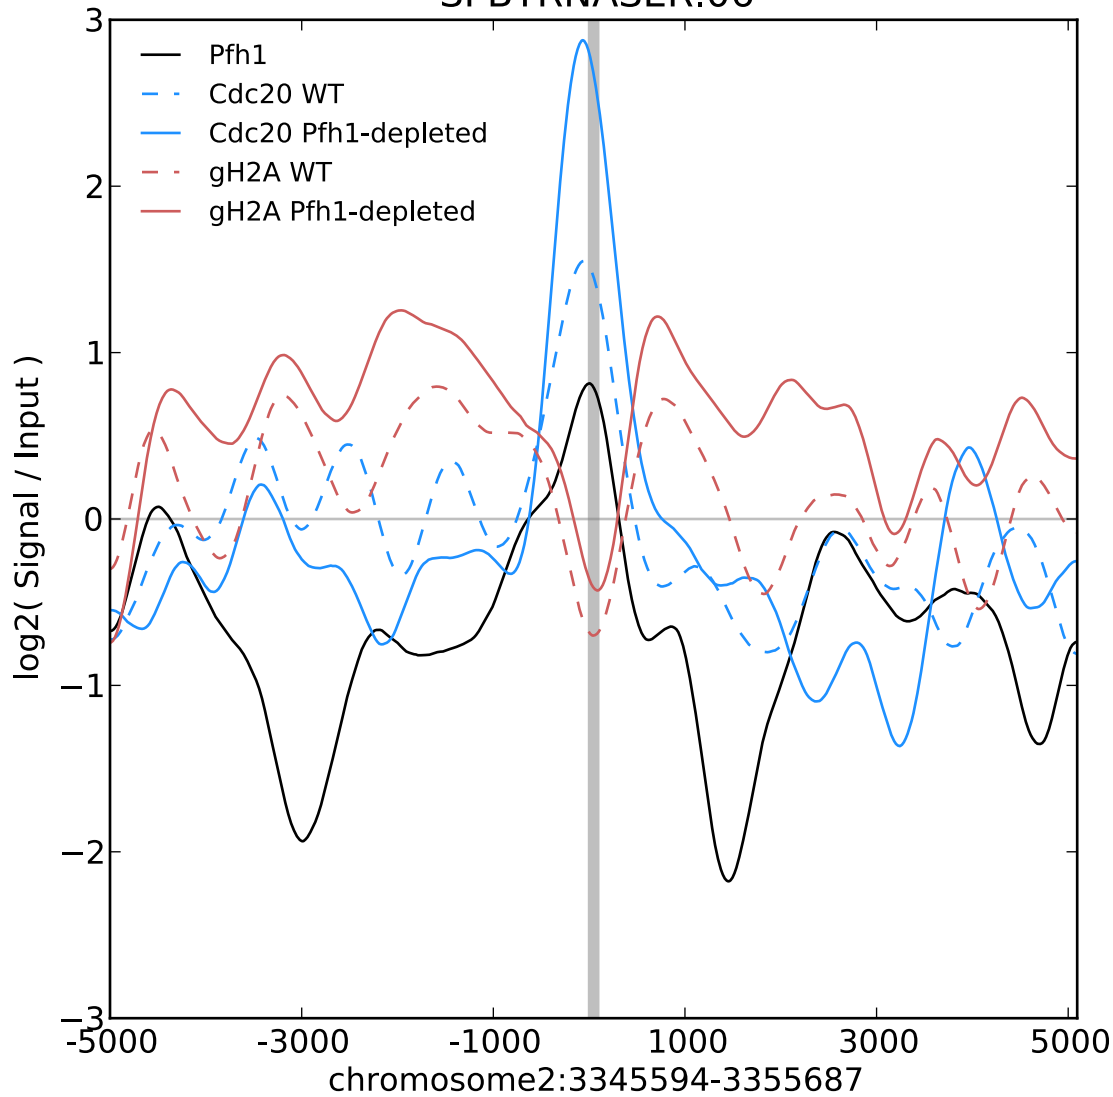

# SPBTRNATHR.06

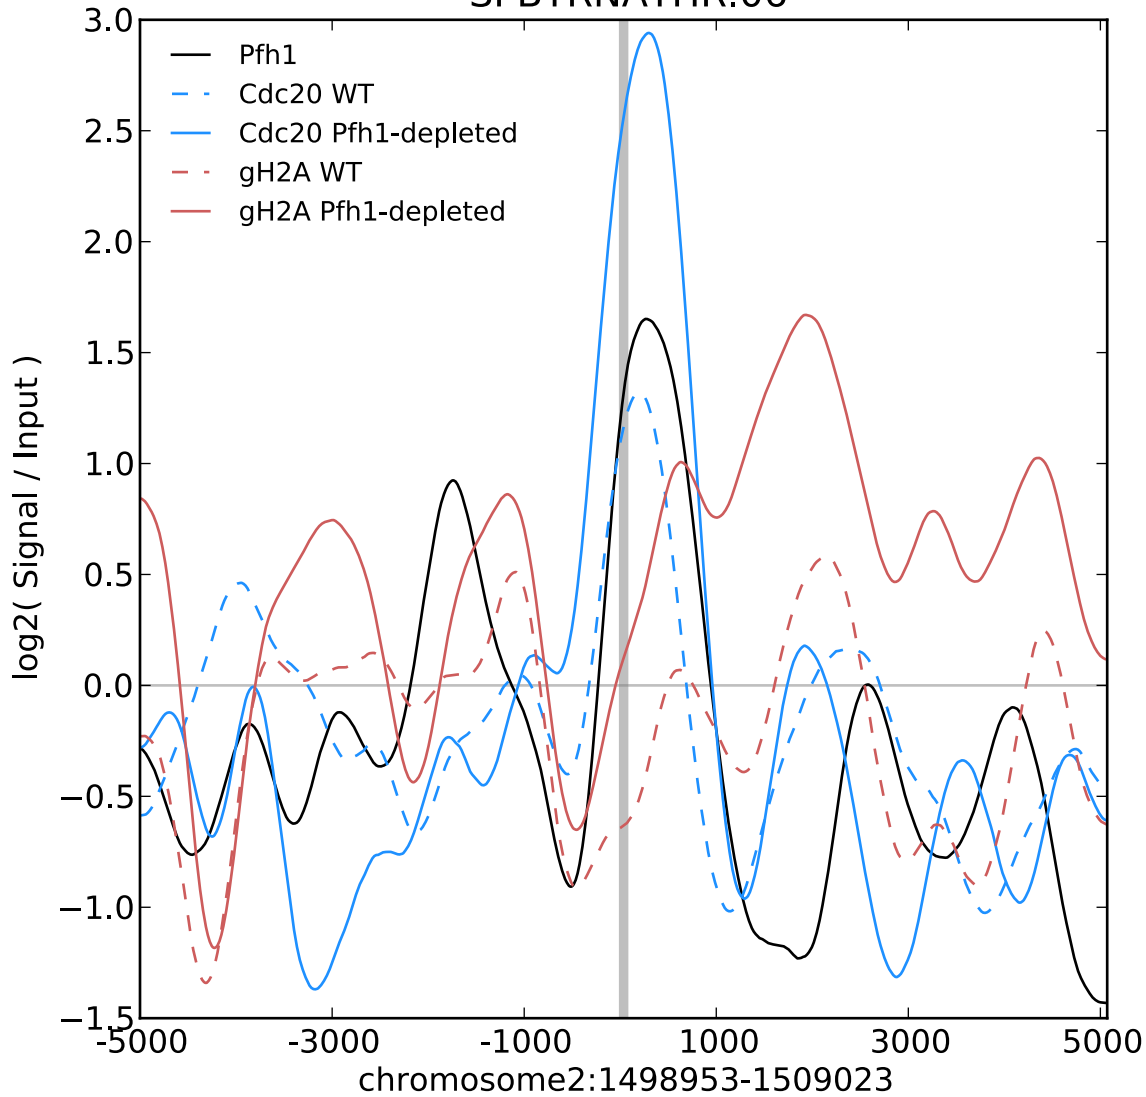

# SPBTRNATHR.07

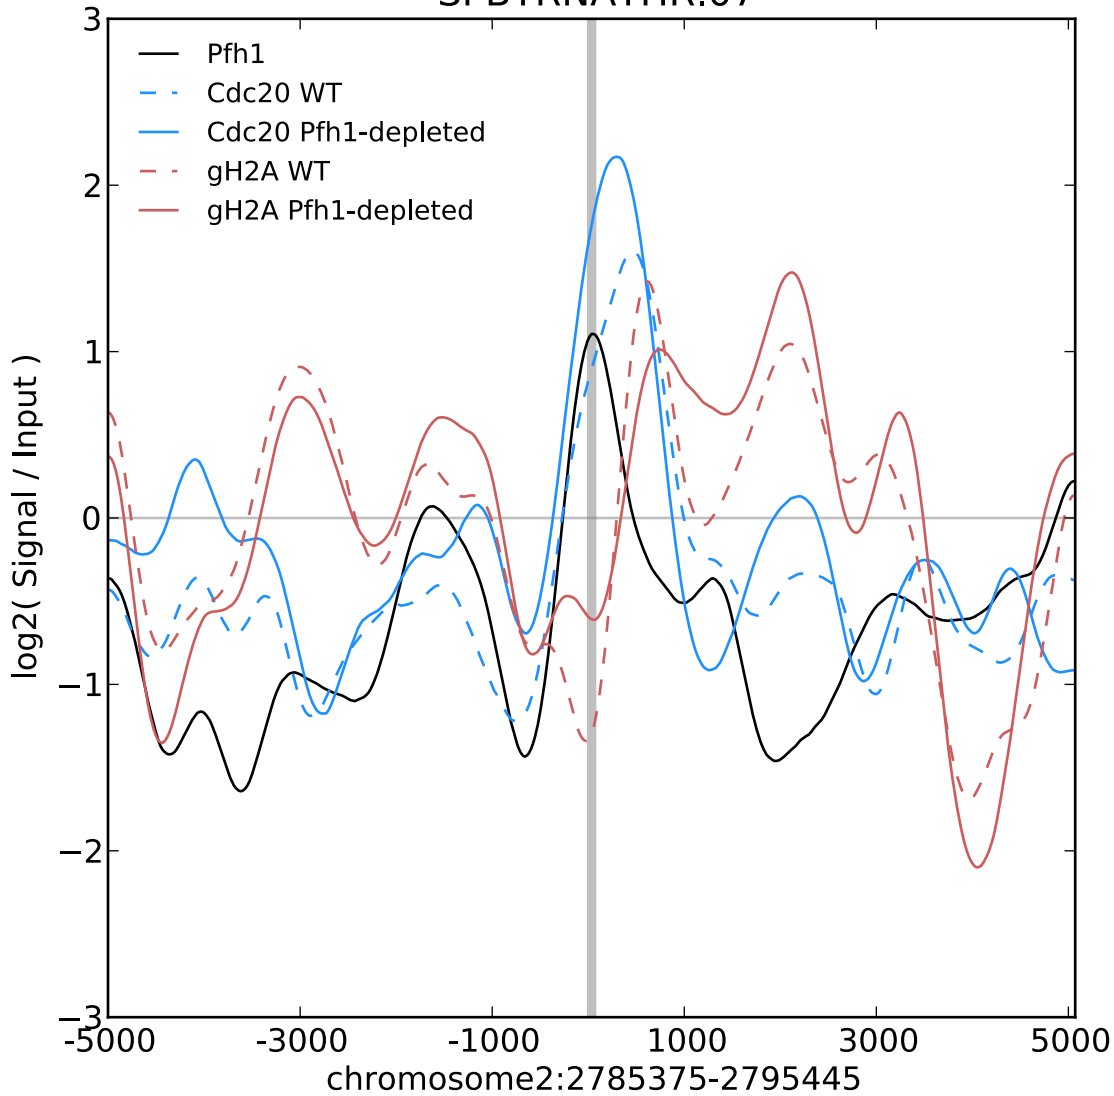

# SPBTRNATRP.02

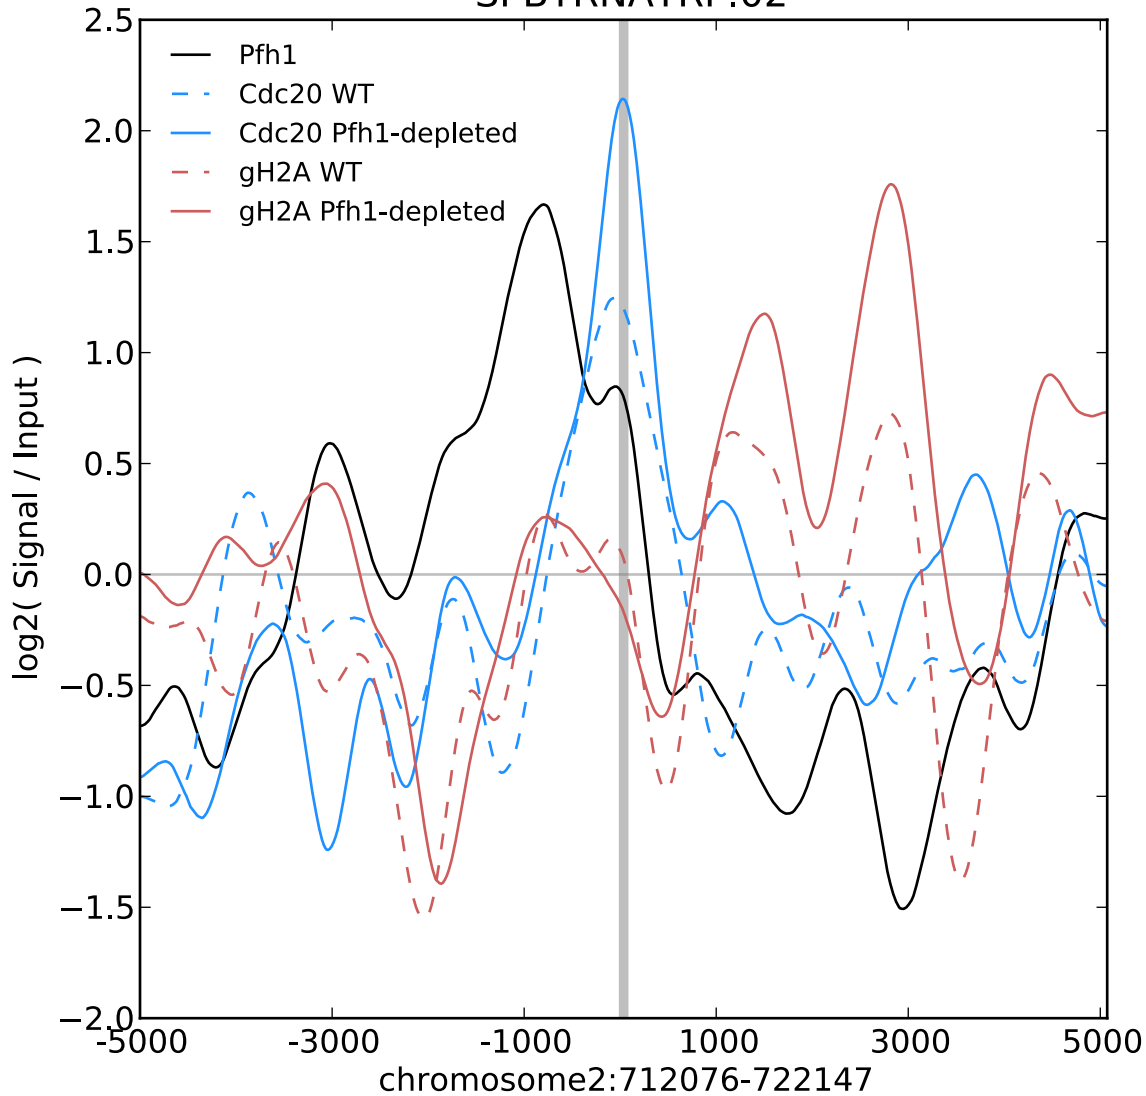



# SPBTRNATRP.03

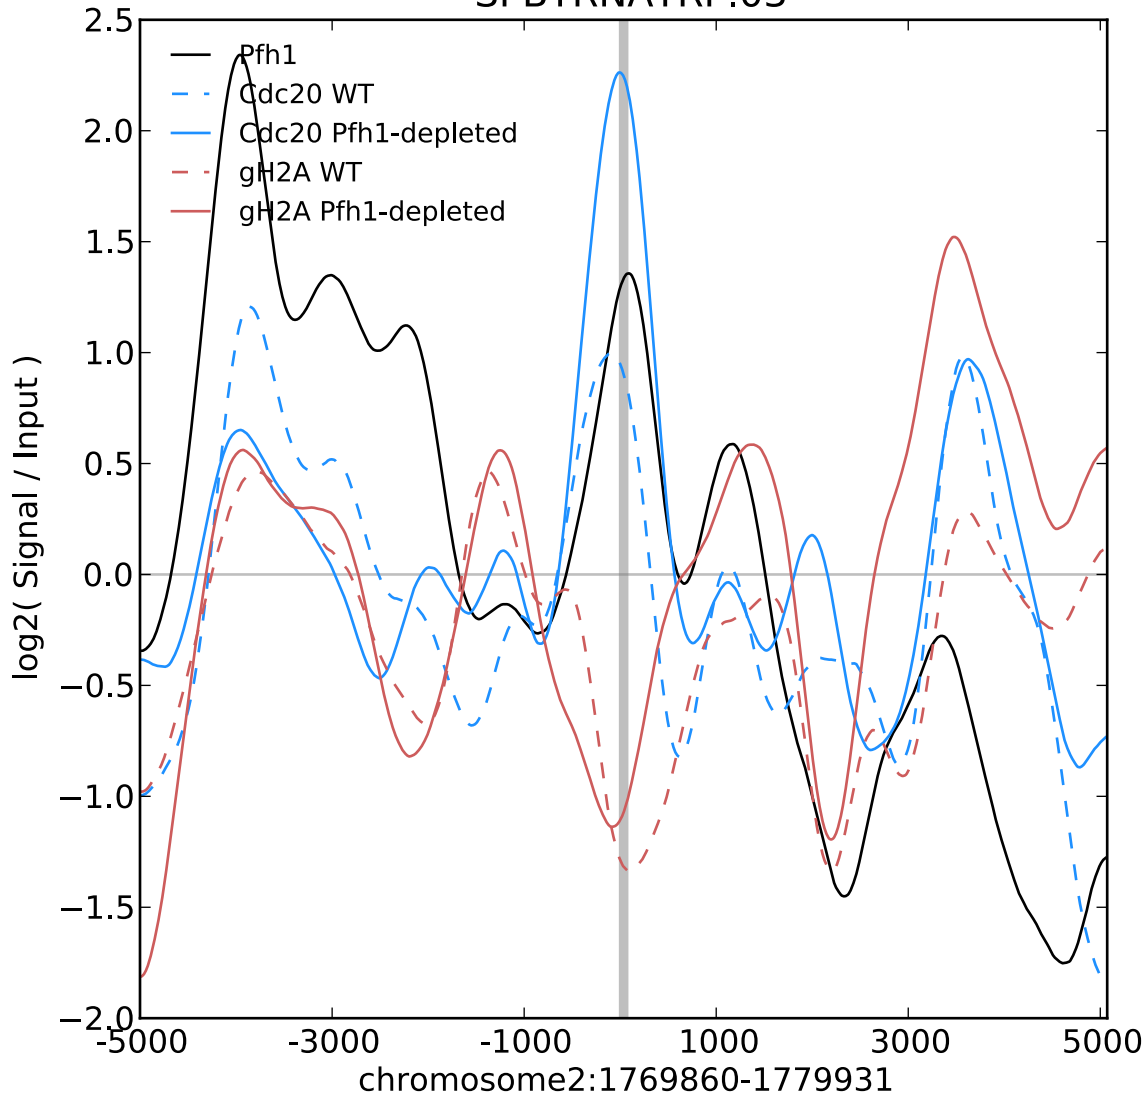

# SPBTRNATYR.02

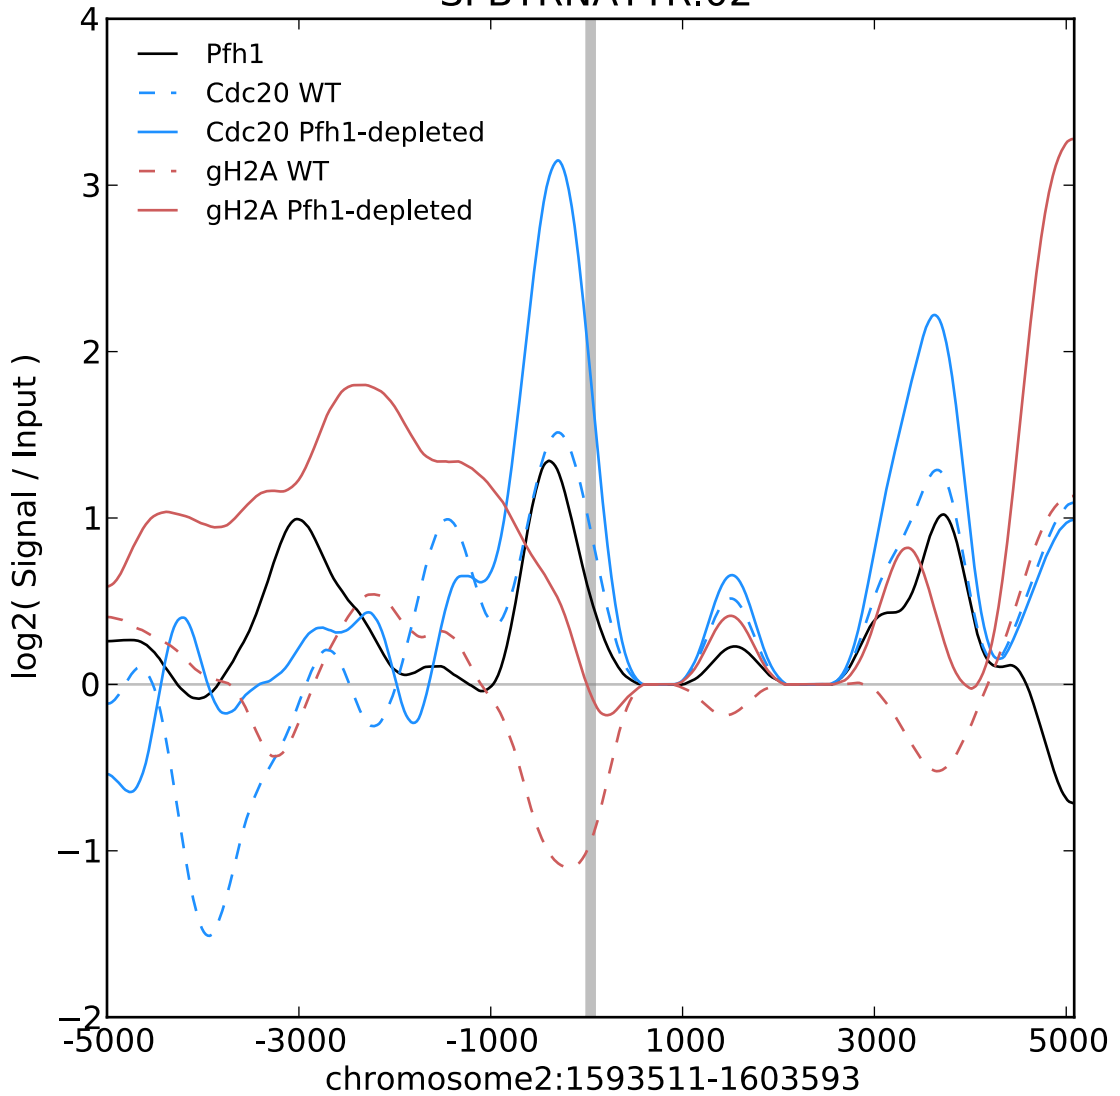

# SPBTRNATYR.03

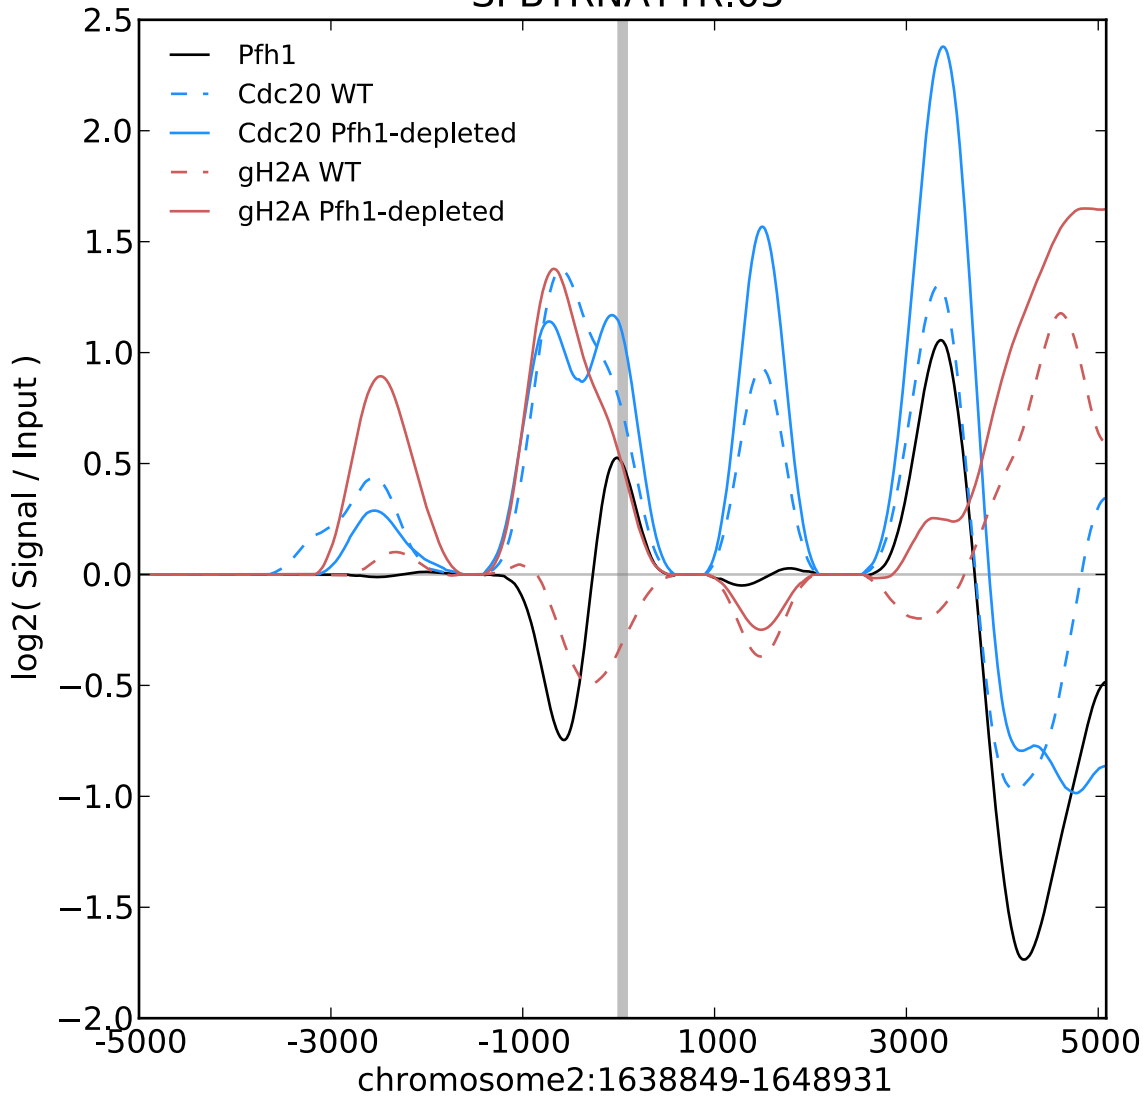

# SPBTRNATYR.04

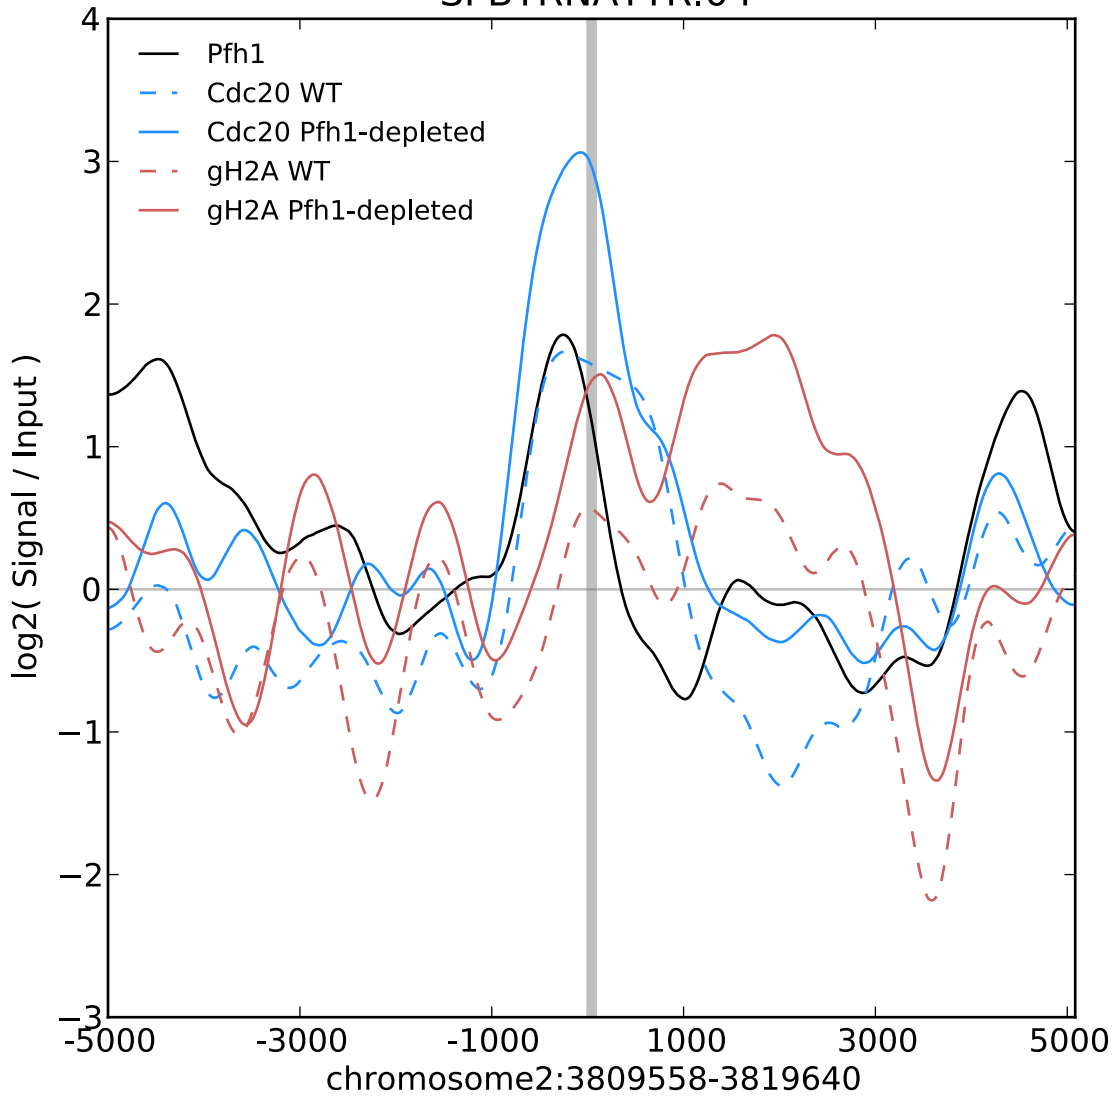

# SPBTRNAVAL.05

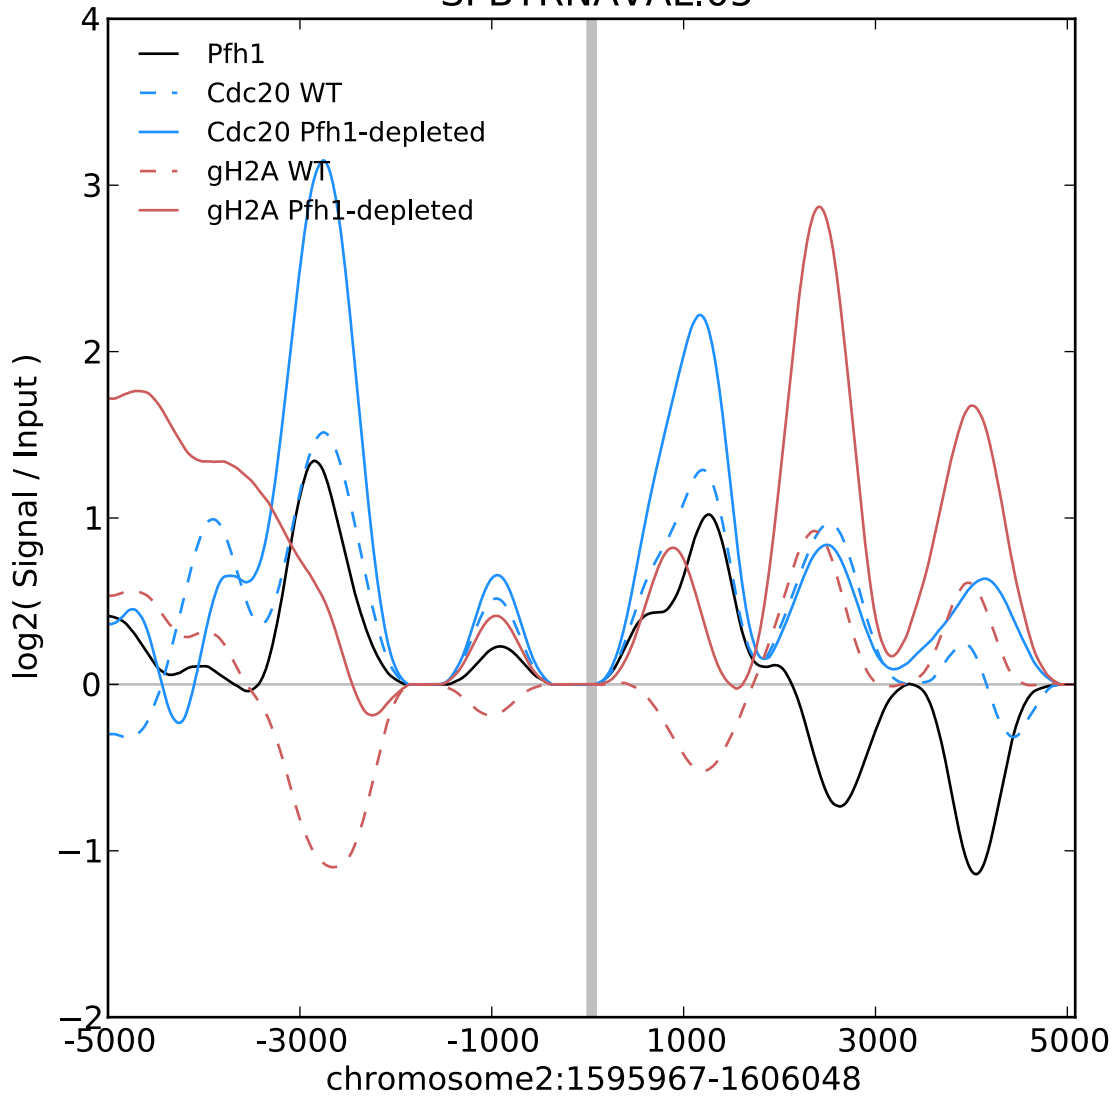

# SPBTRNAVAL.06

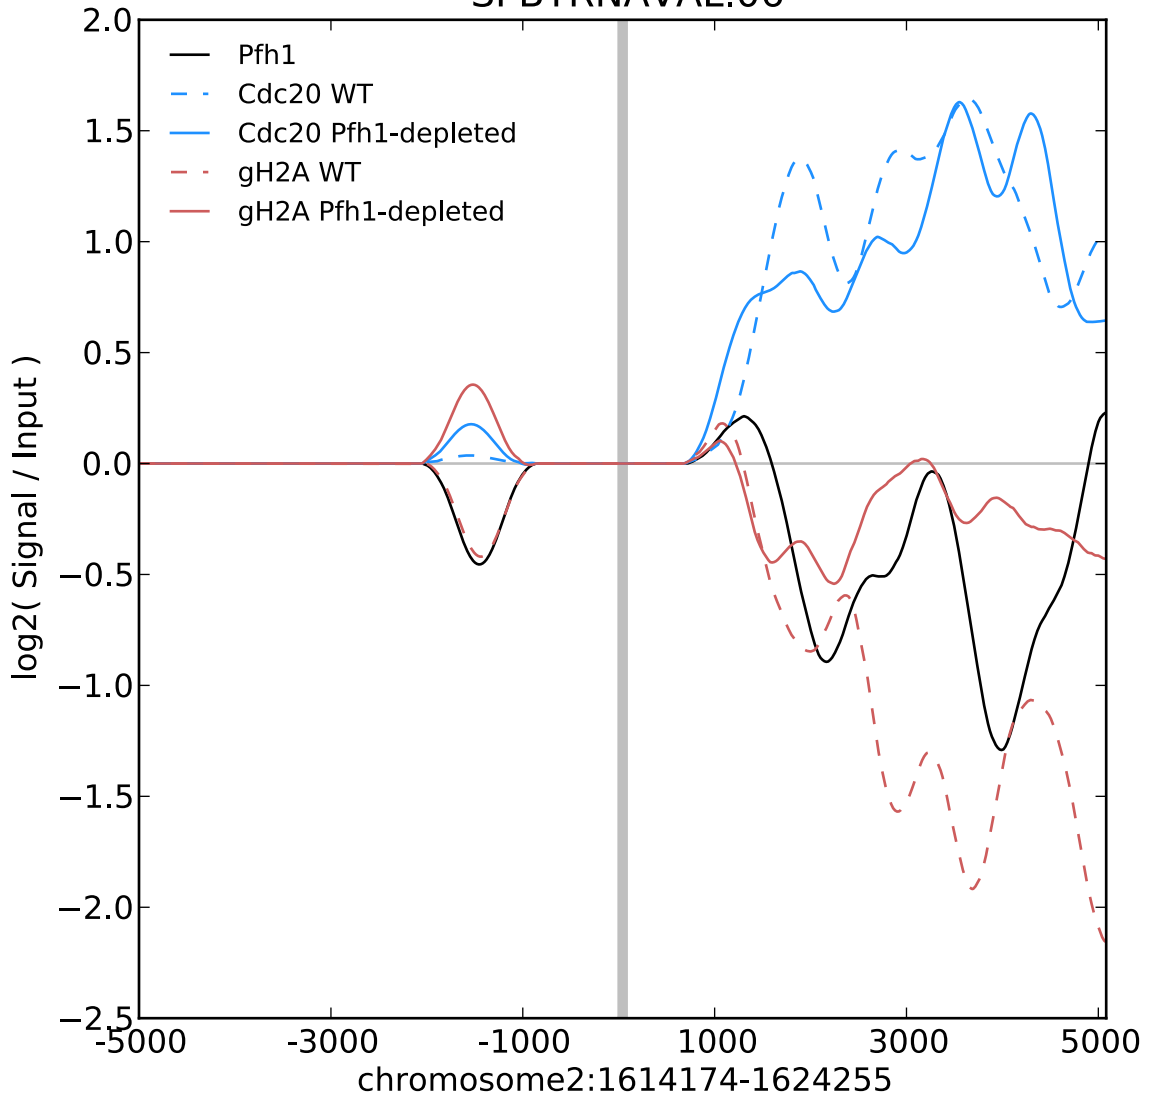

# SPBTRNAVAL.07

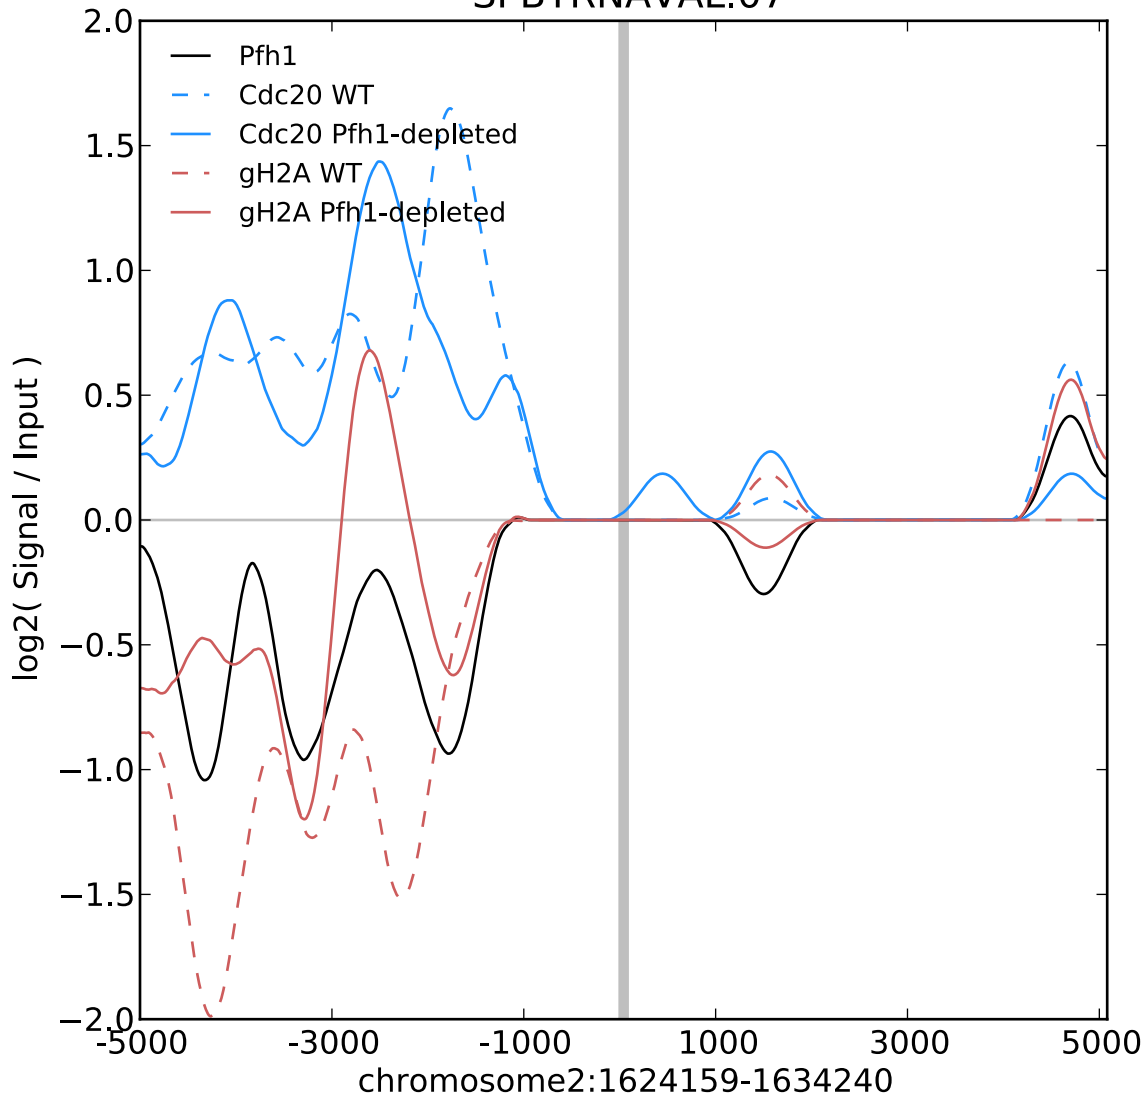

# SPBTRNAVAL.08

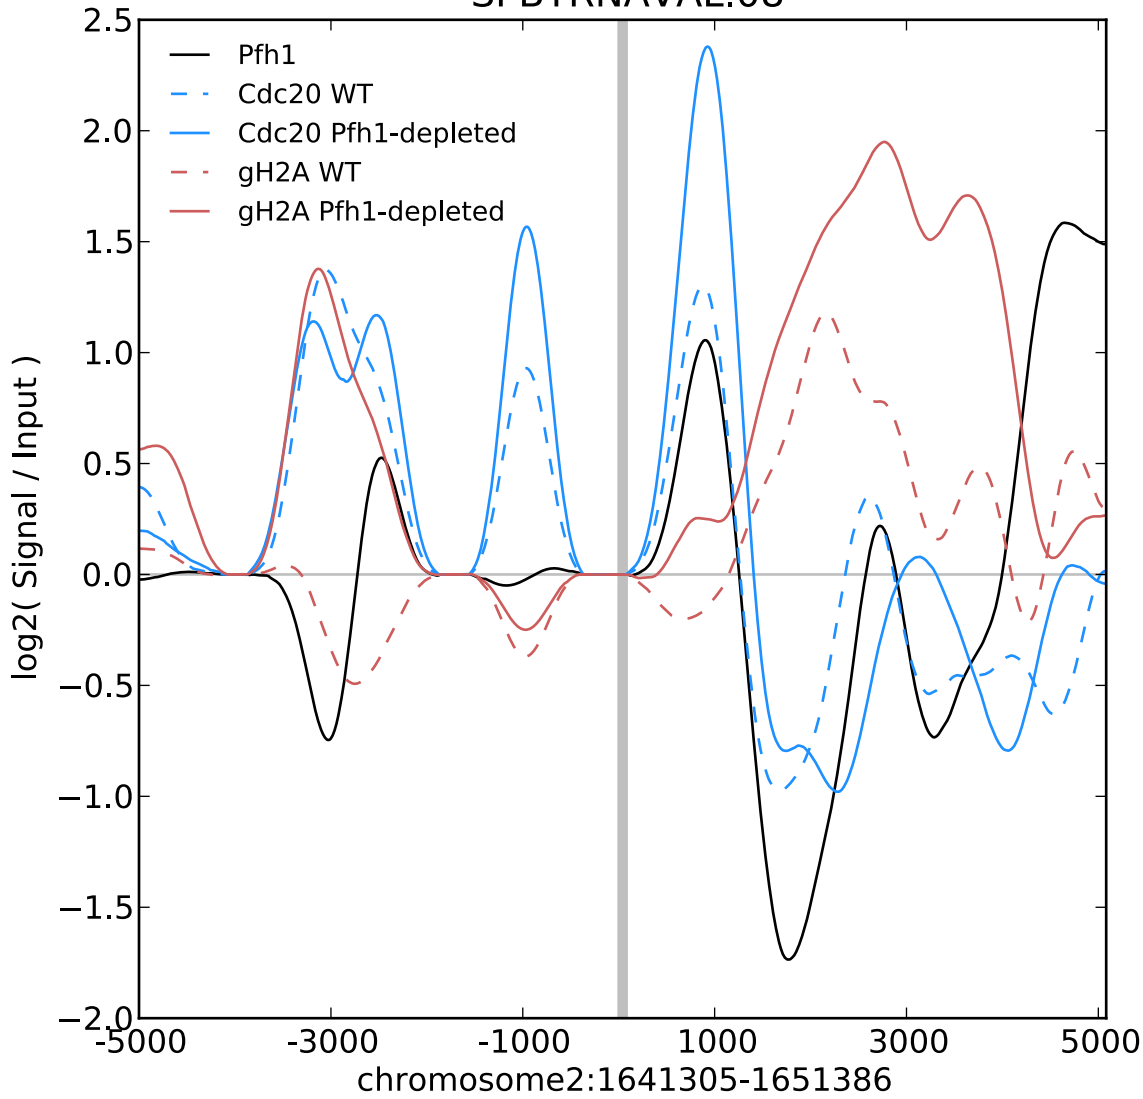



# tRNA ALA.12

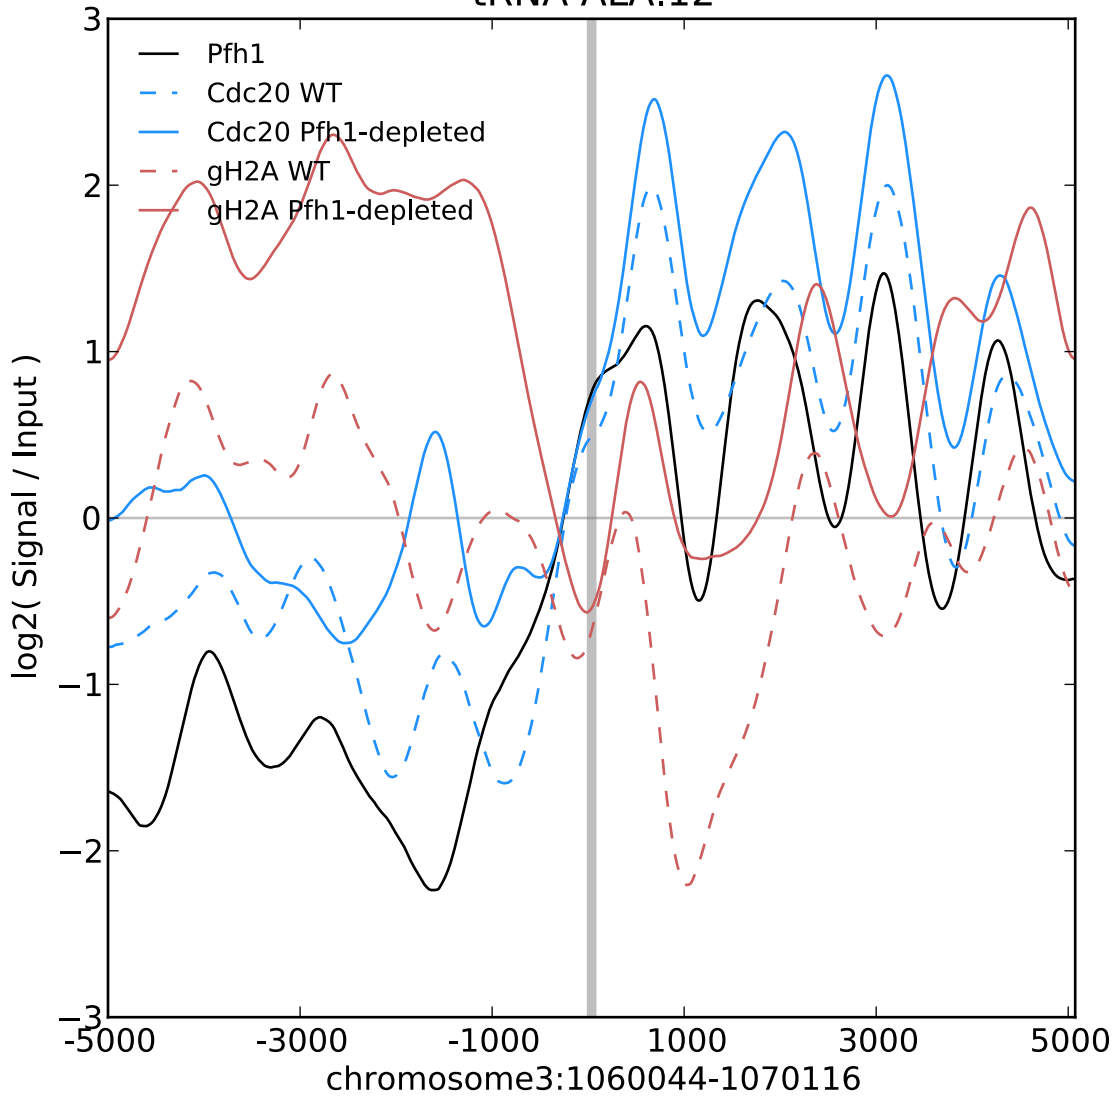

# tRNA ARG.08

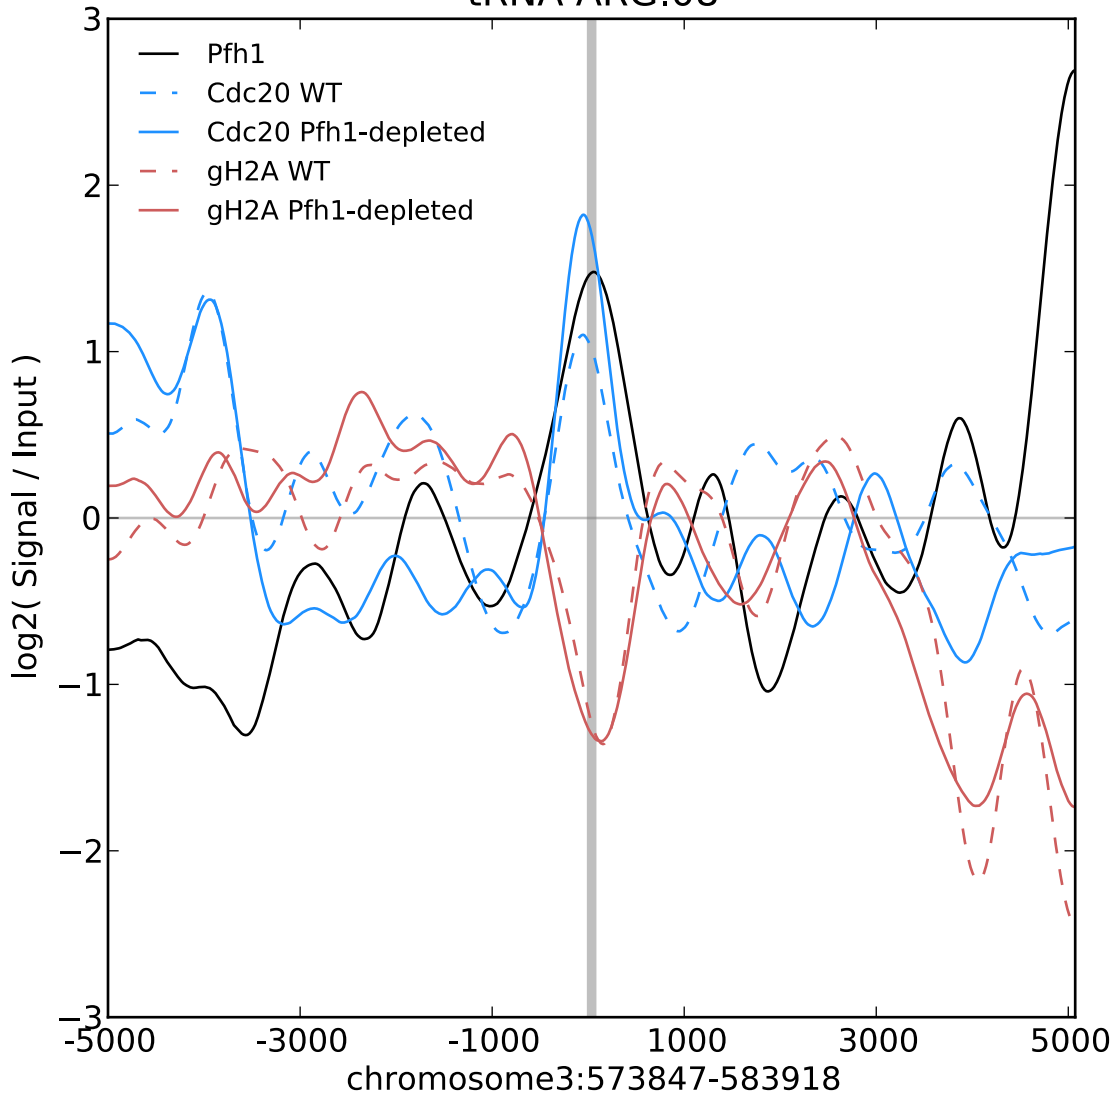

# tRNA ARG.09

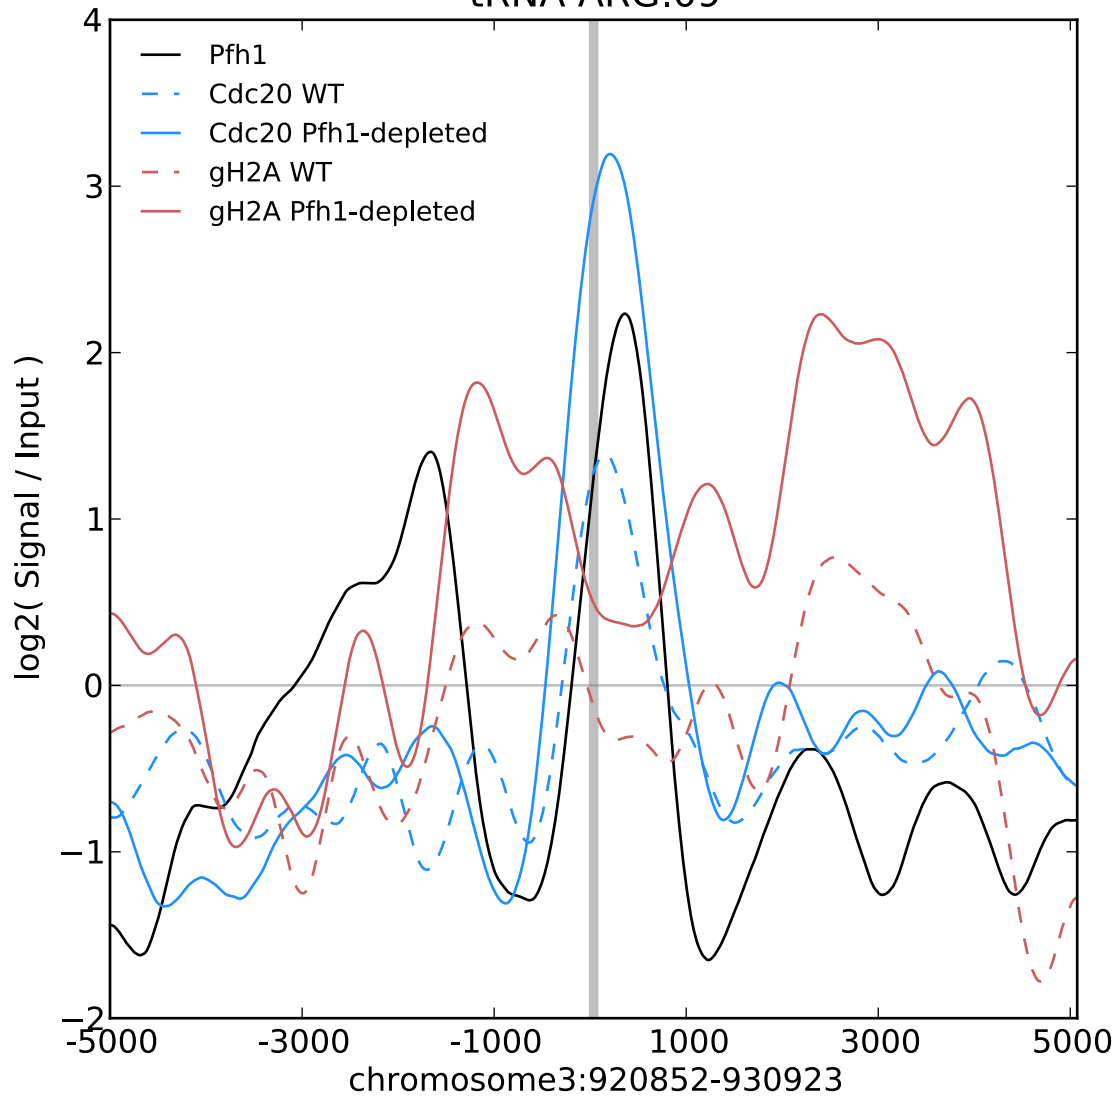

# tRNA ARG.10

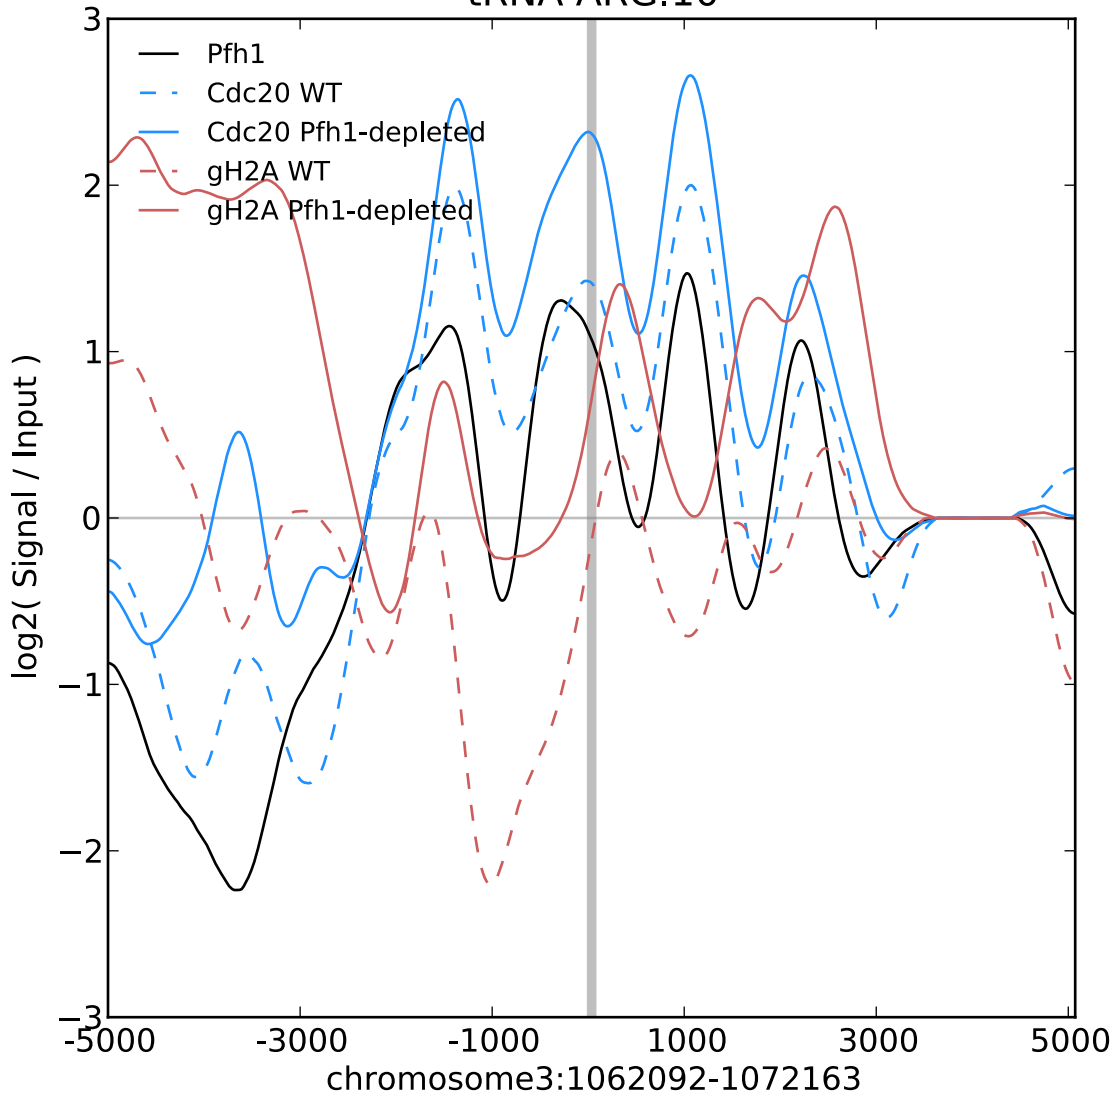

# tRNA ARG.11

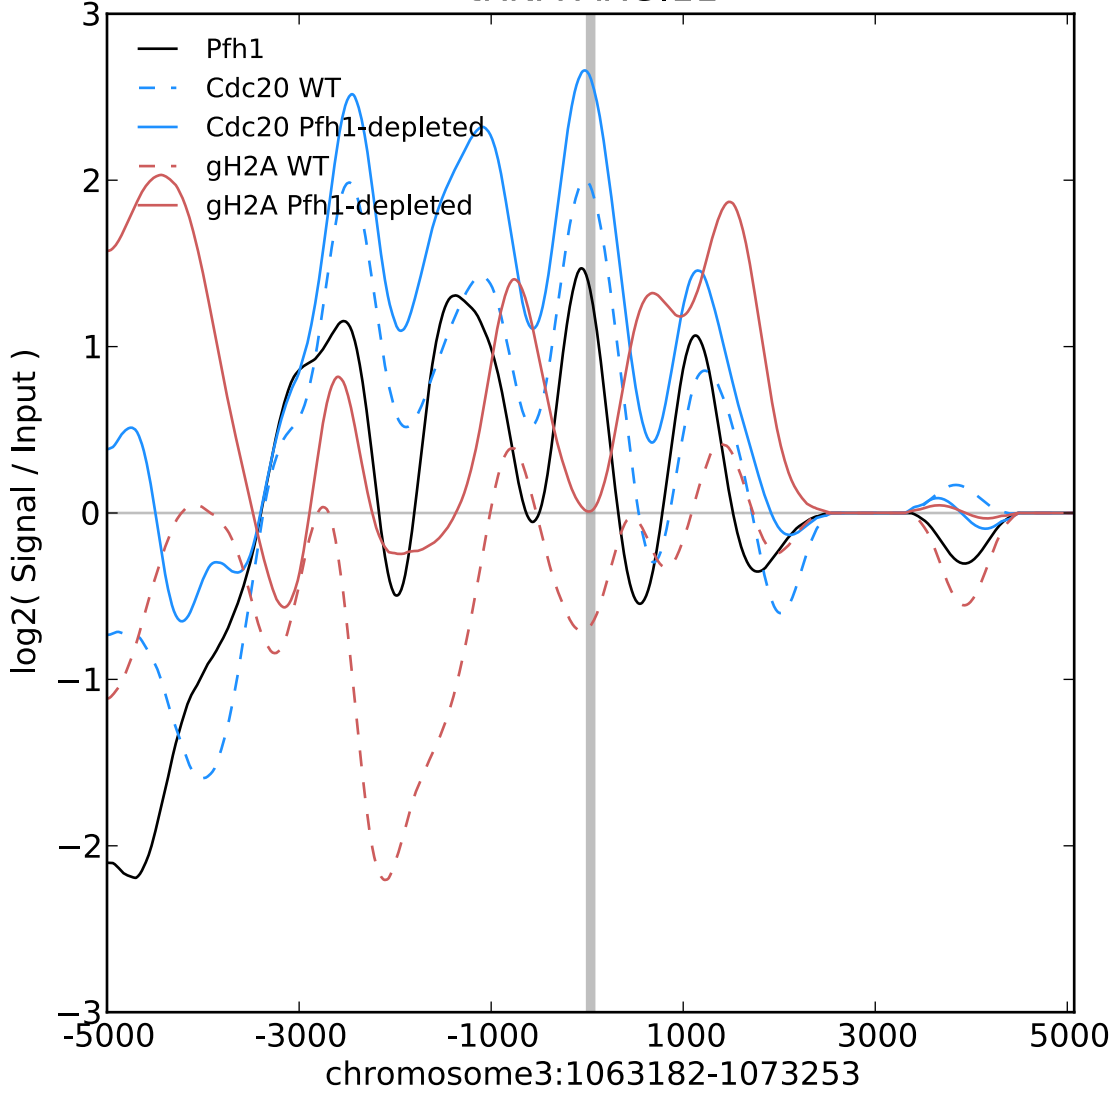

# tRNA ARG.12

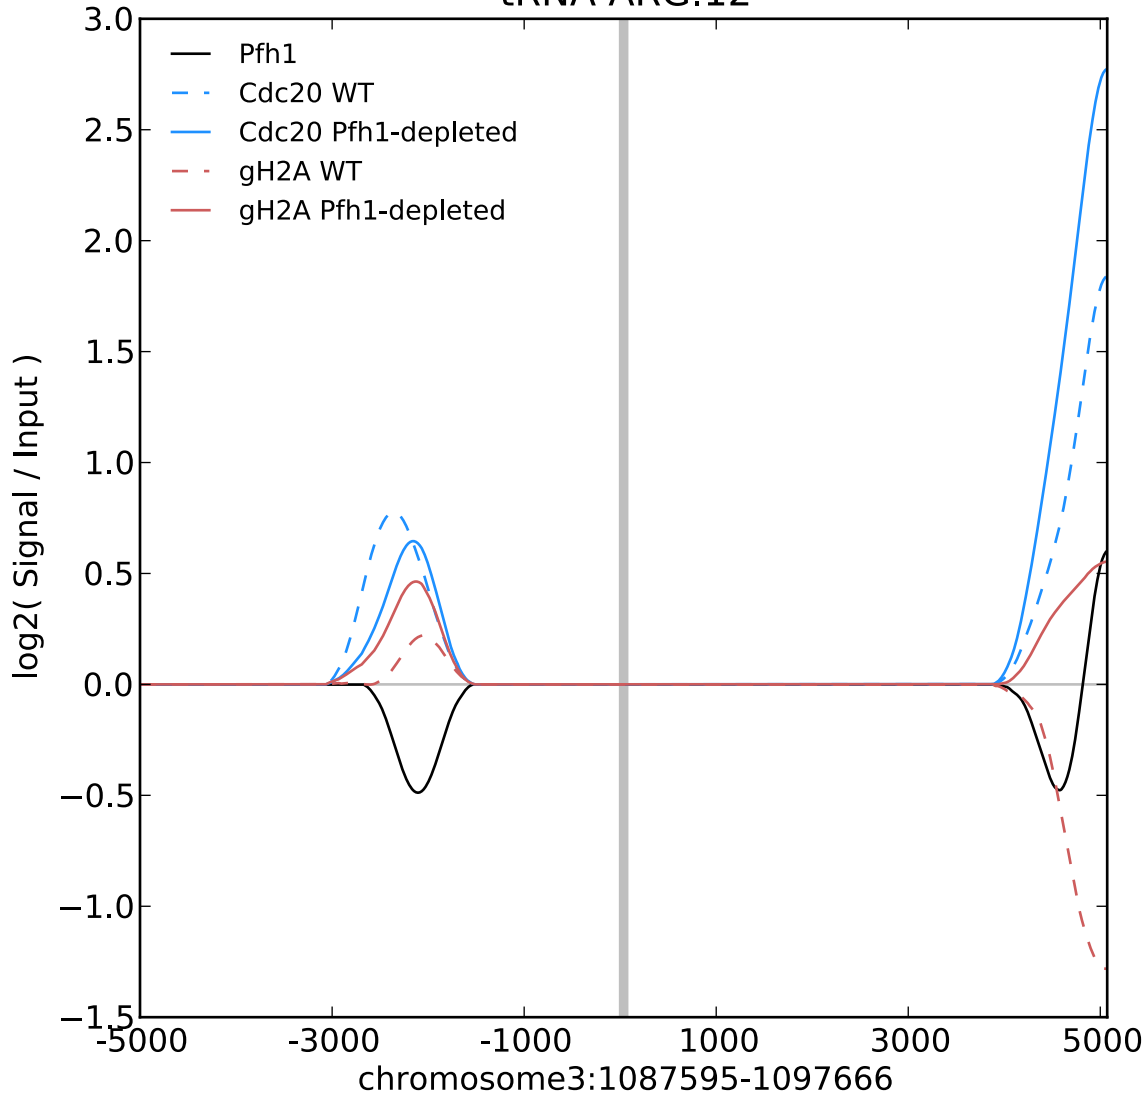

# tRNA ARG.13

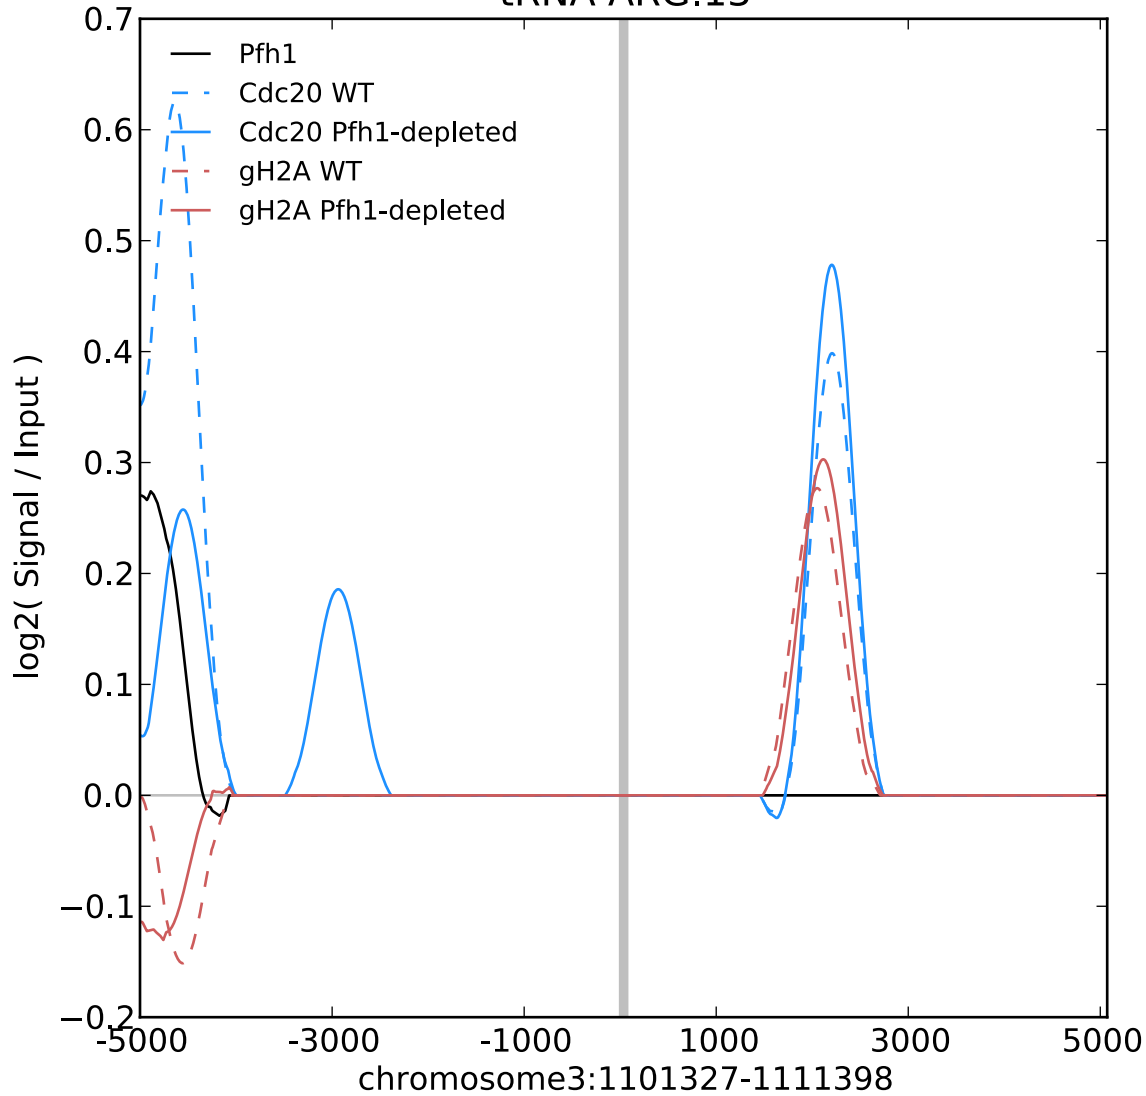

# tRNA ASN.05

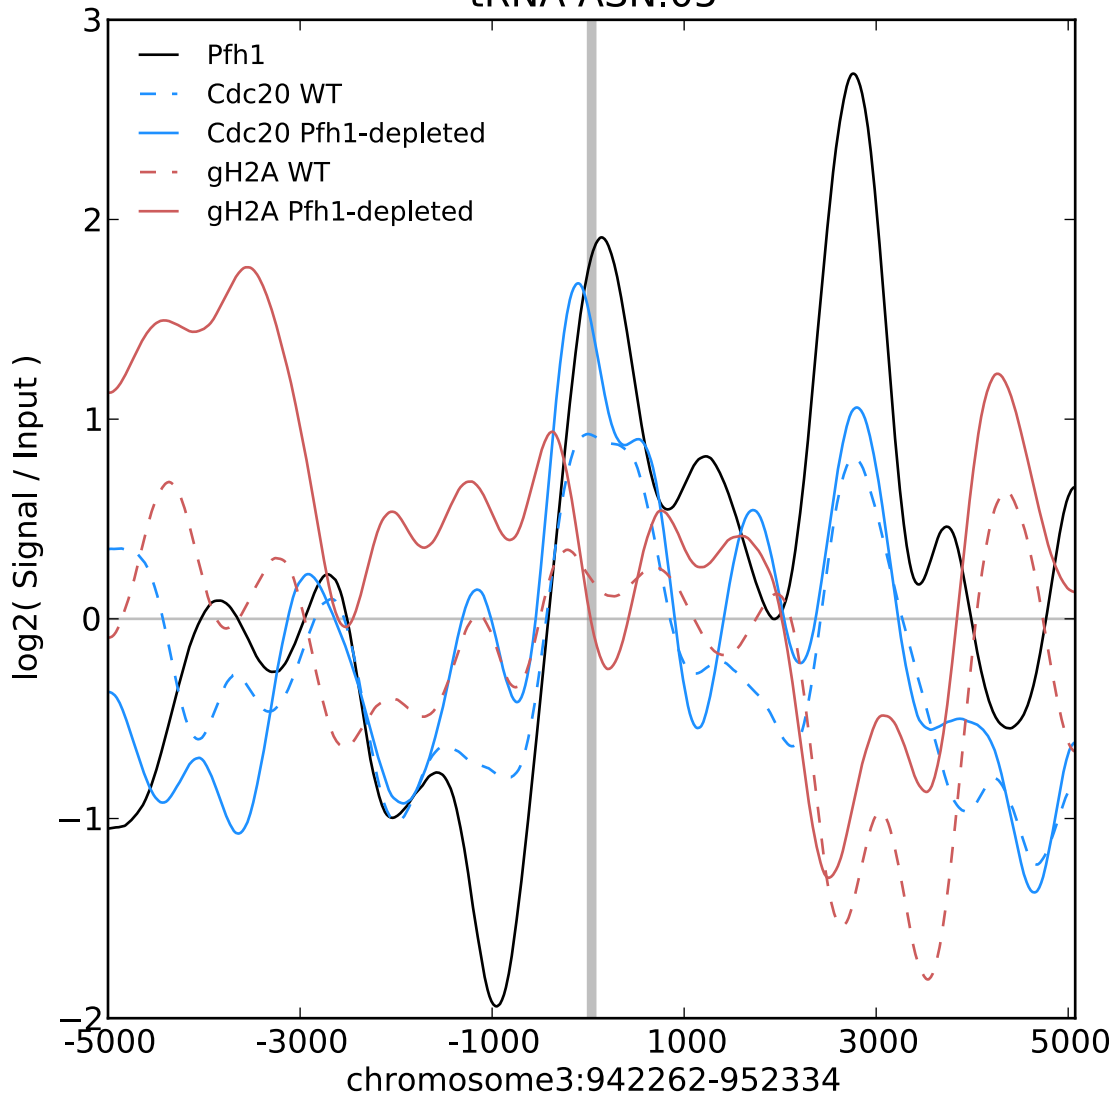



# tRNA ASN.06

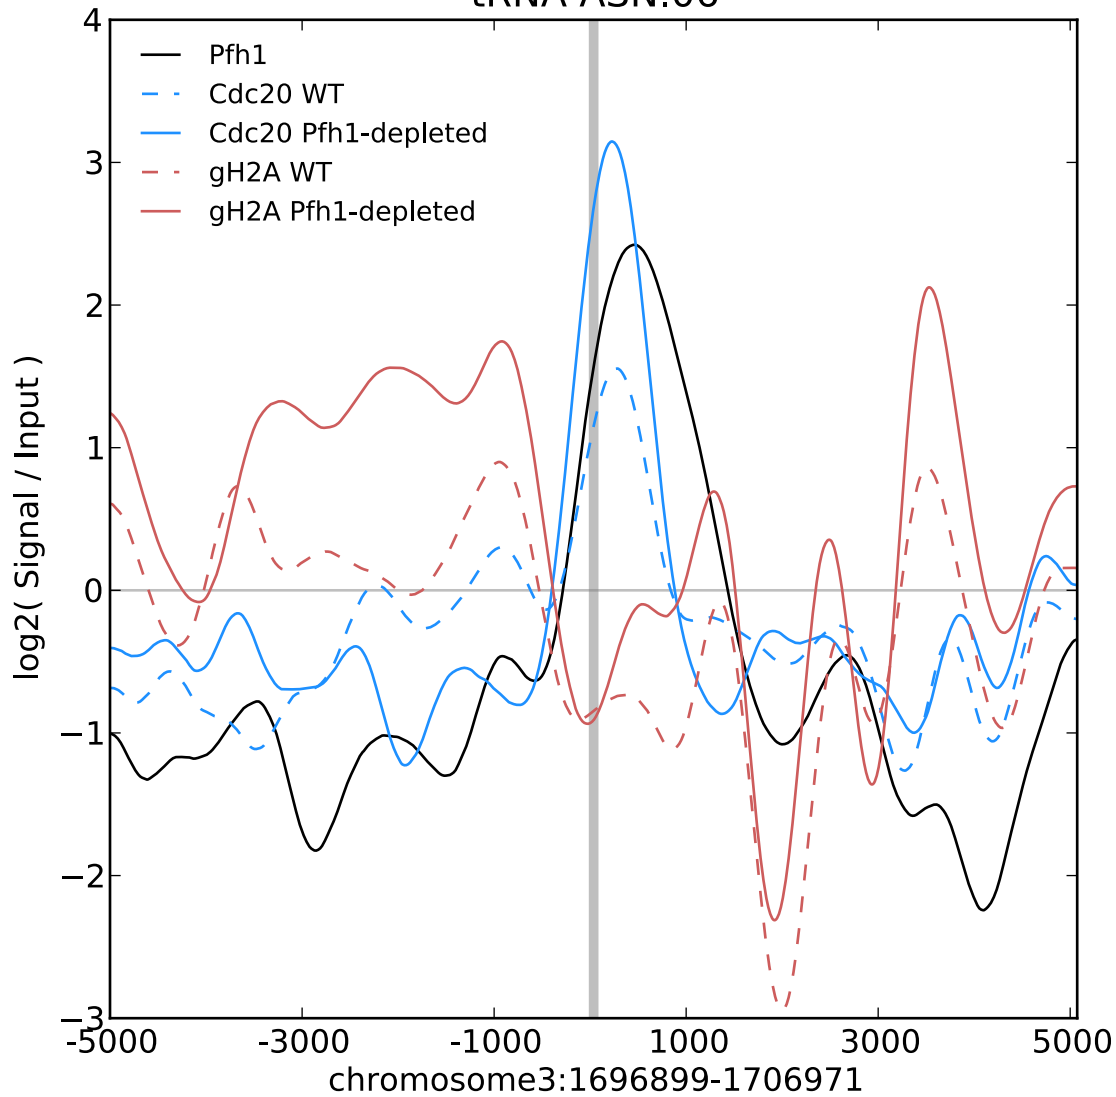

# tRNA ASP.05

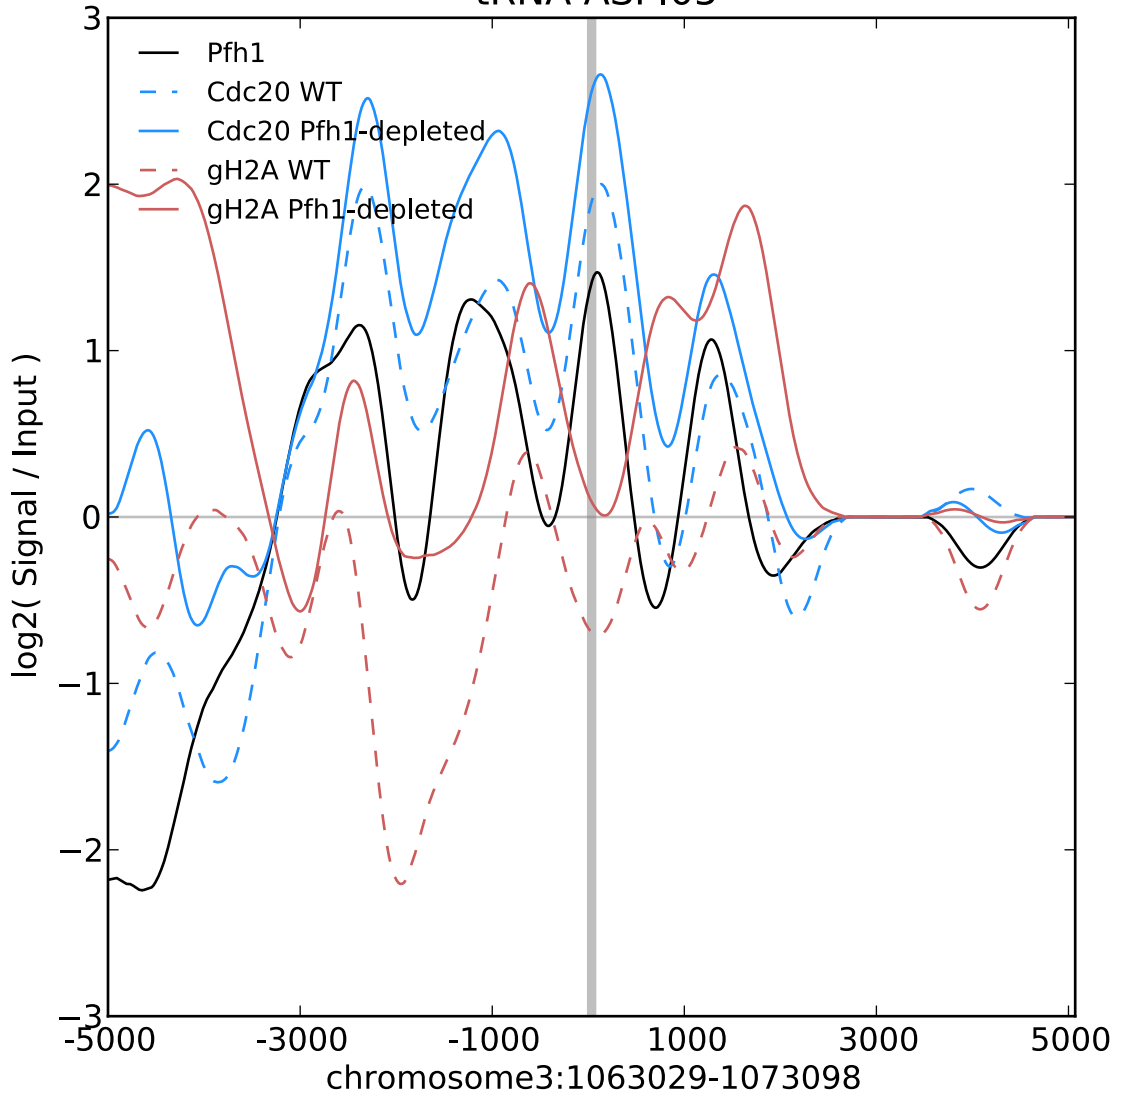

# tRNA ASP.06

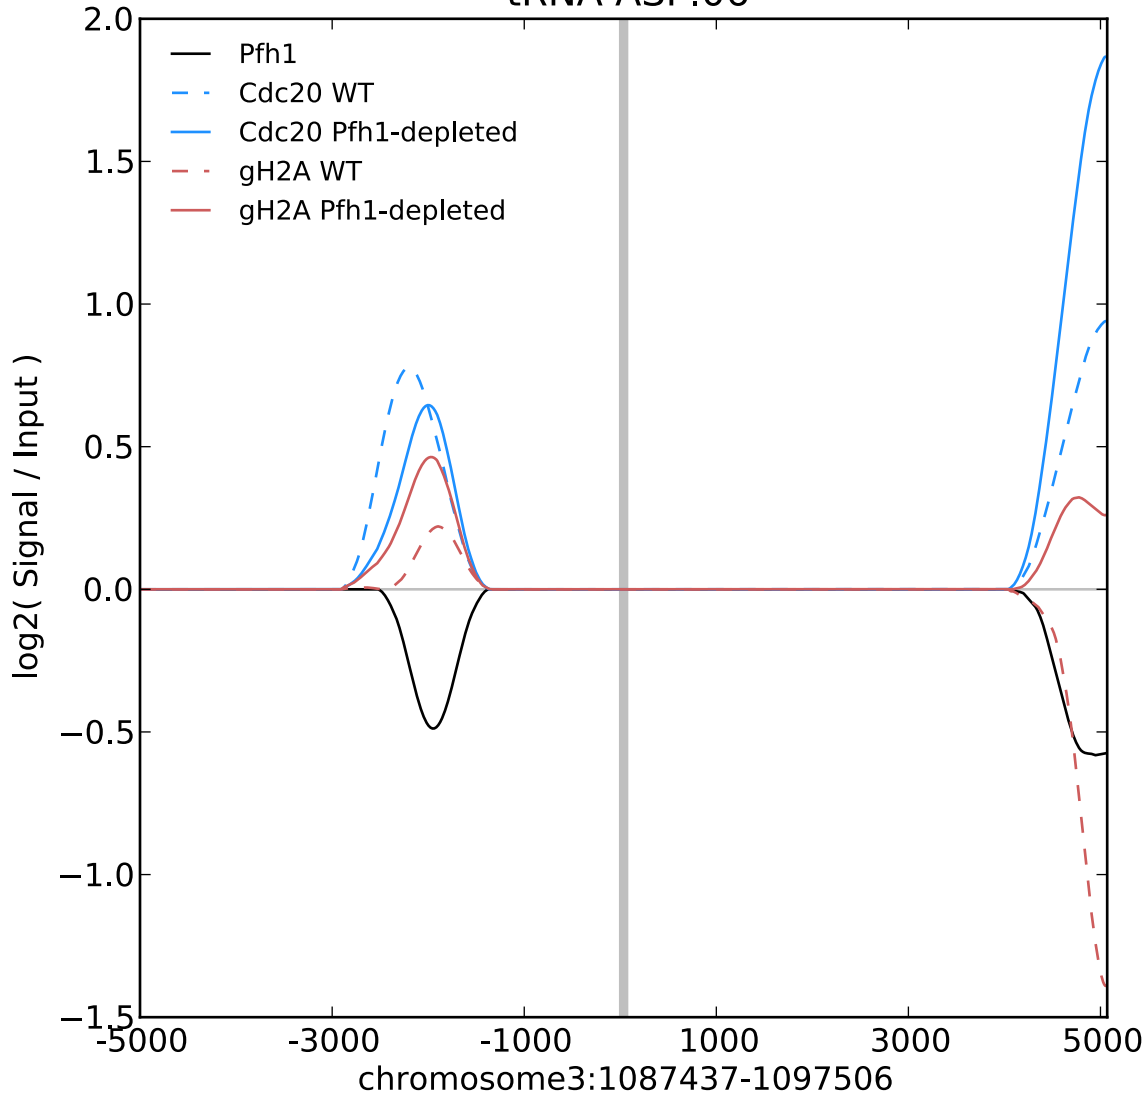

# tRNA ASP.07

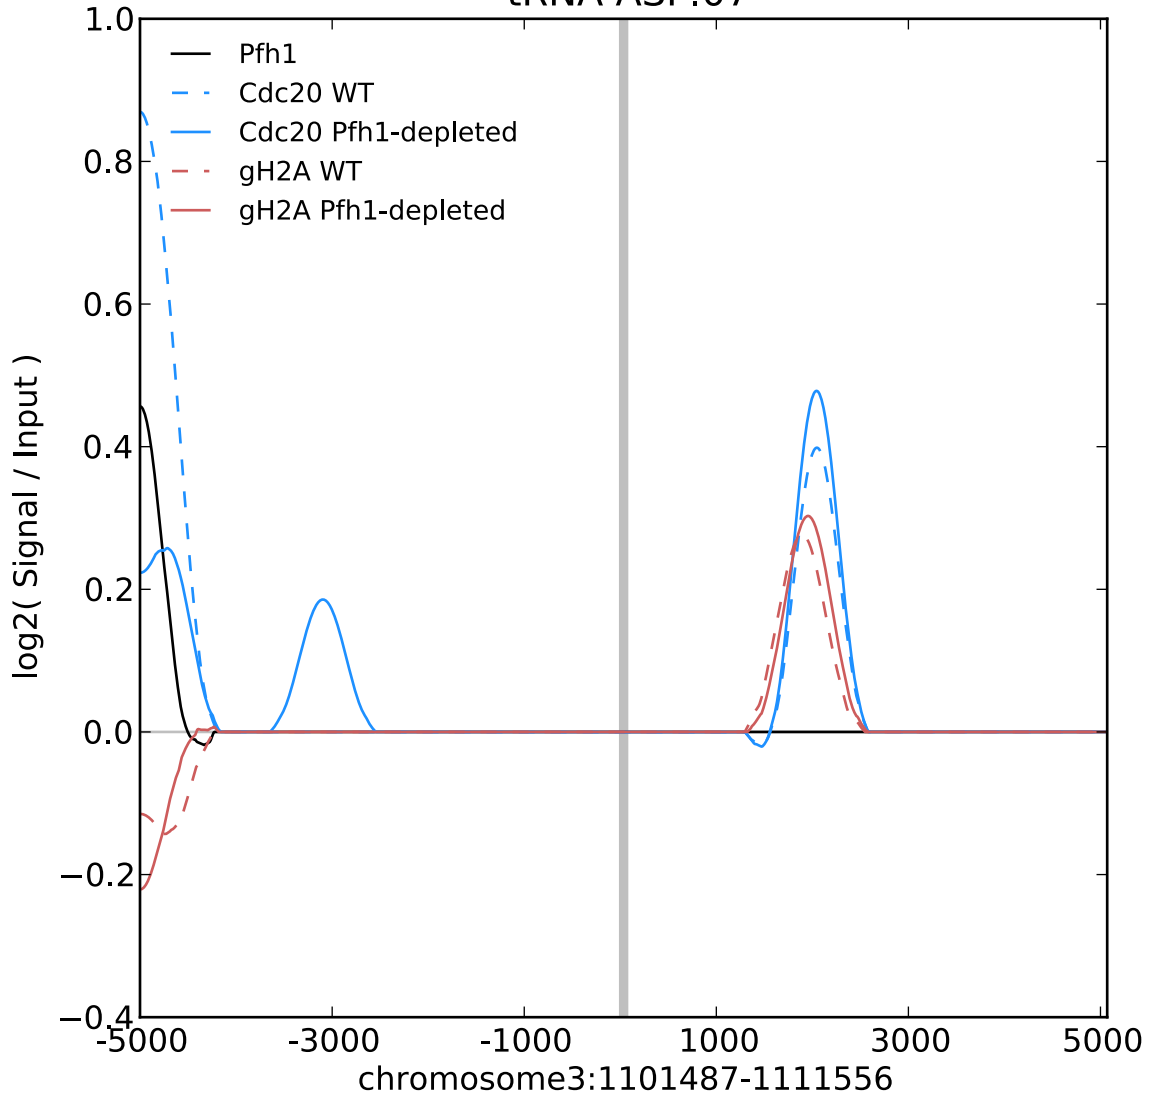

# tRNA ASP.08

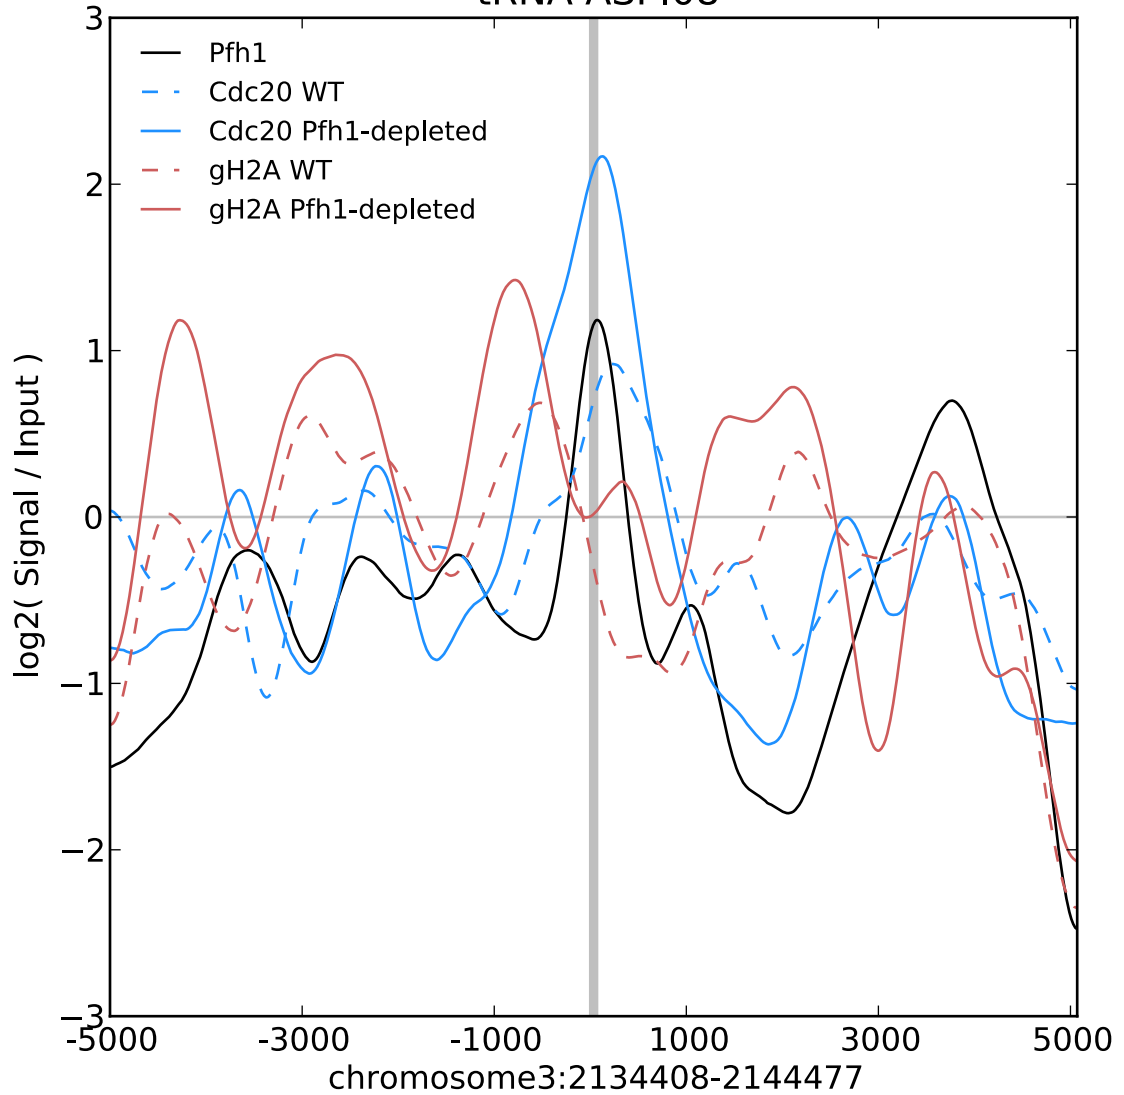

# tRNA GLN.05

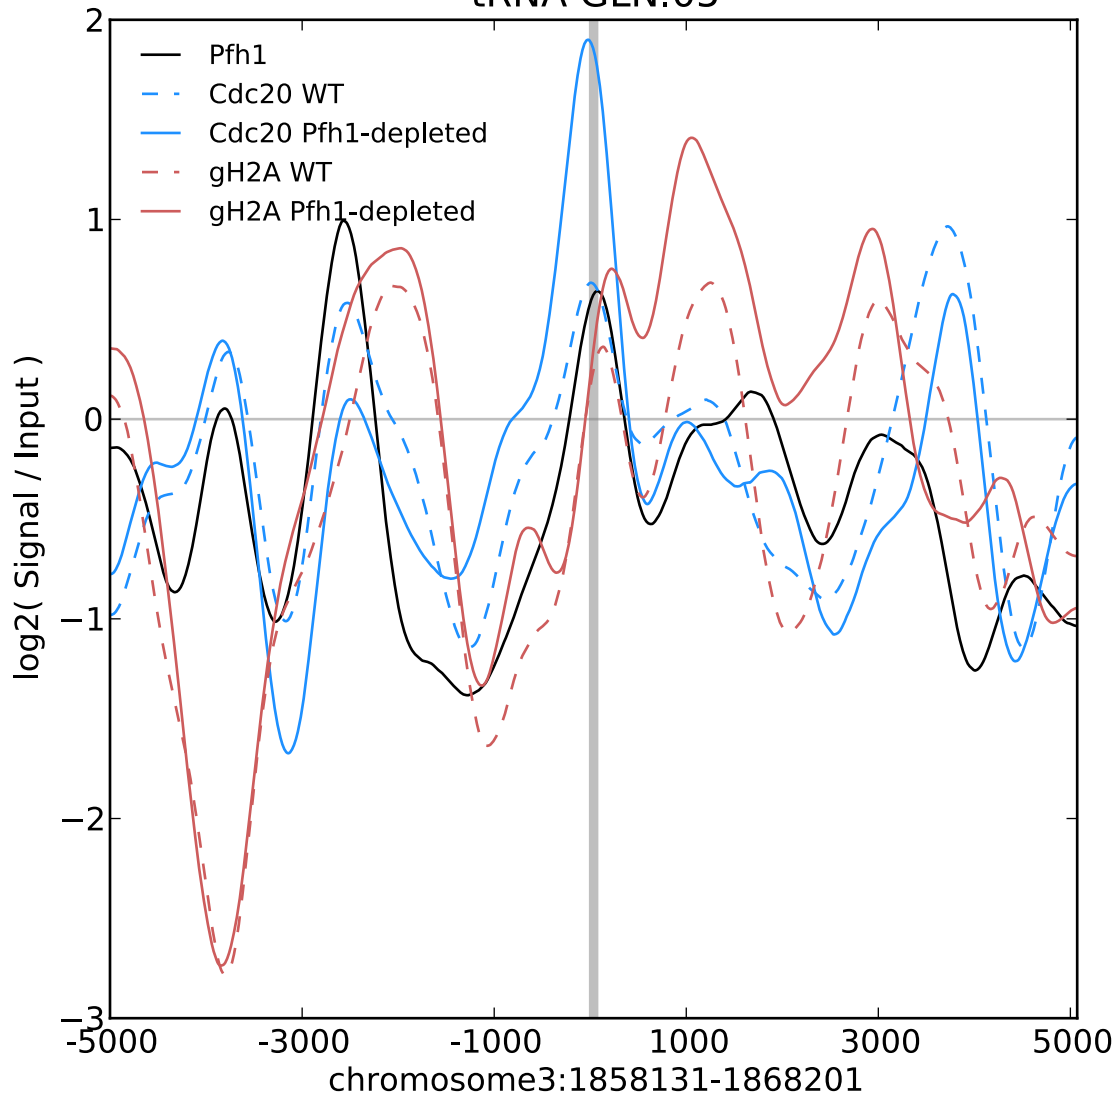

# tRNA GLN.06

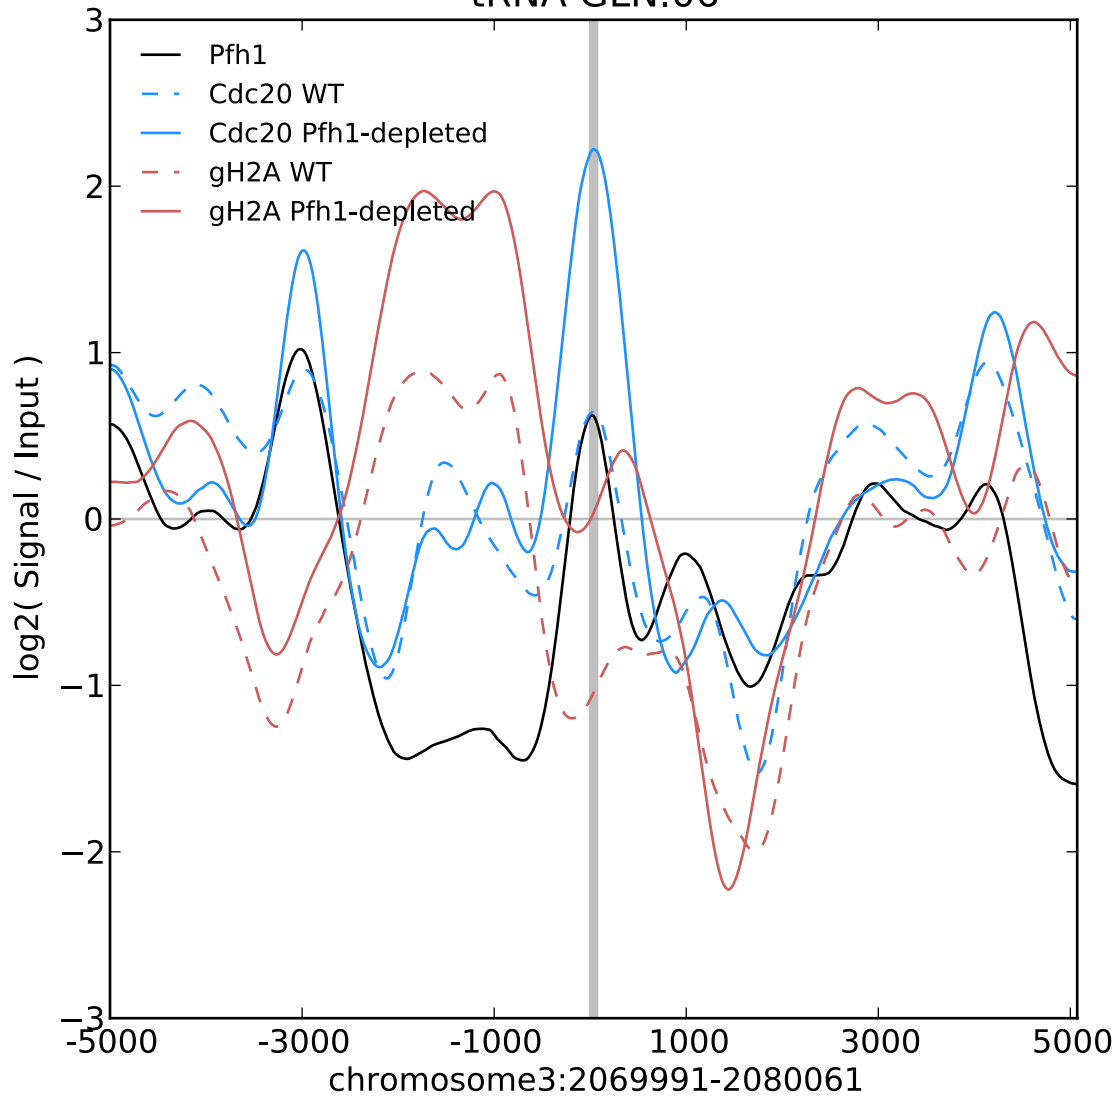

# tRNA GLU.09

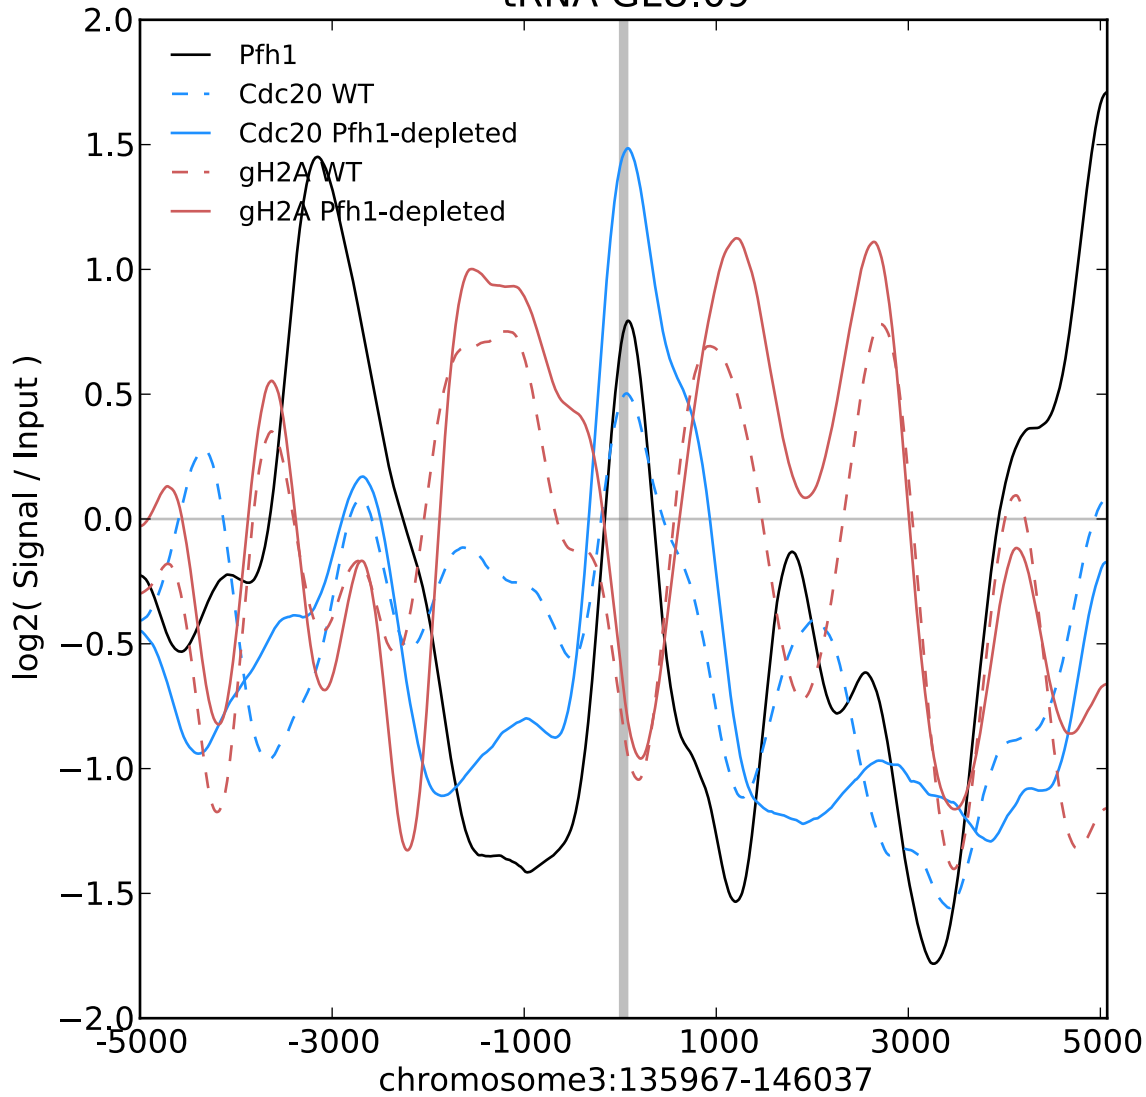



# tRNA GLU.10

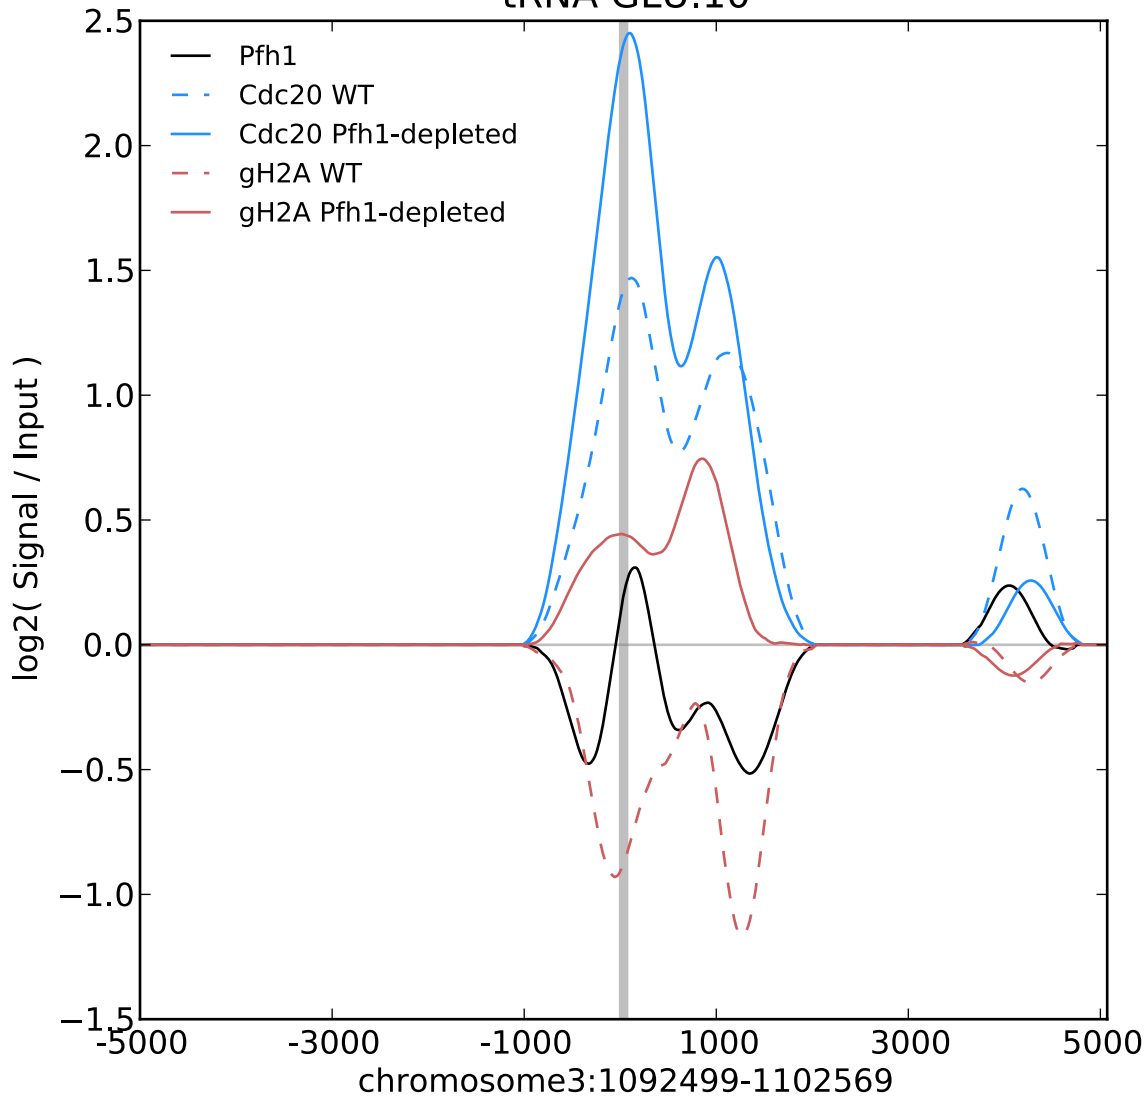

# tRNA GLY.10

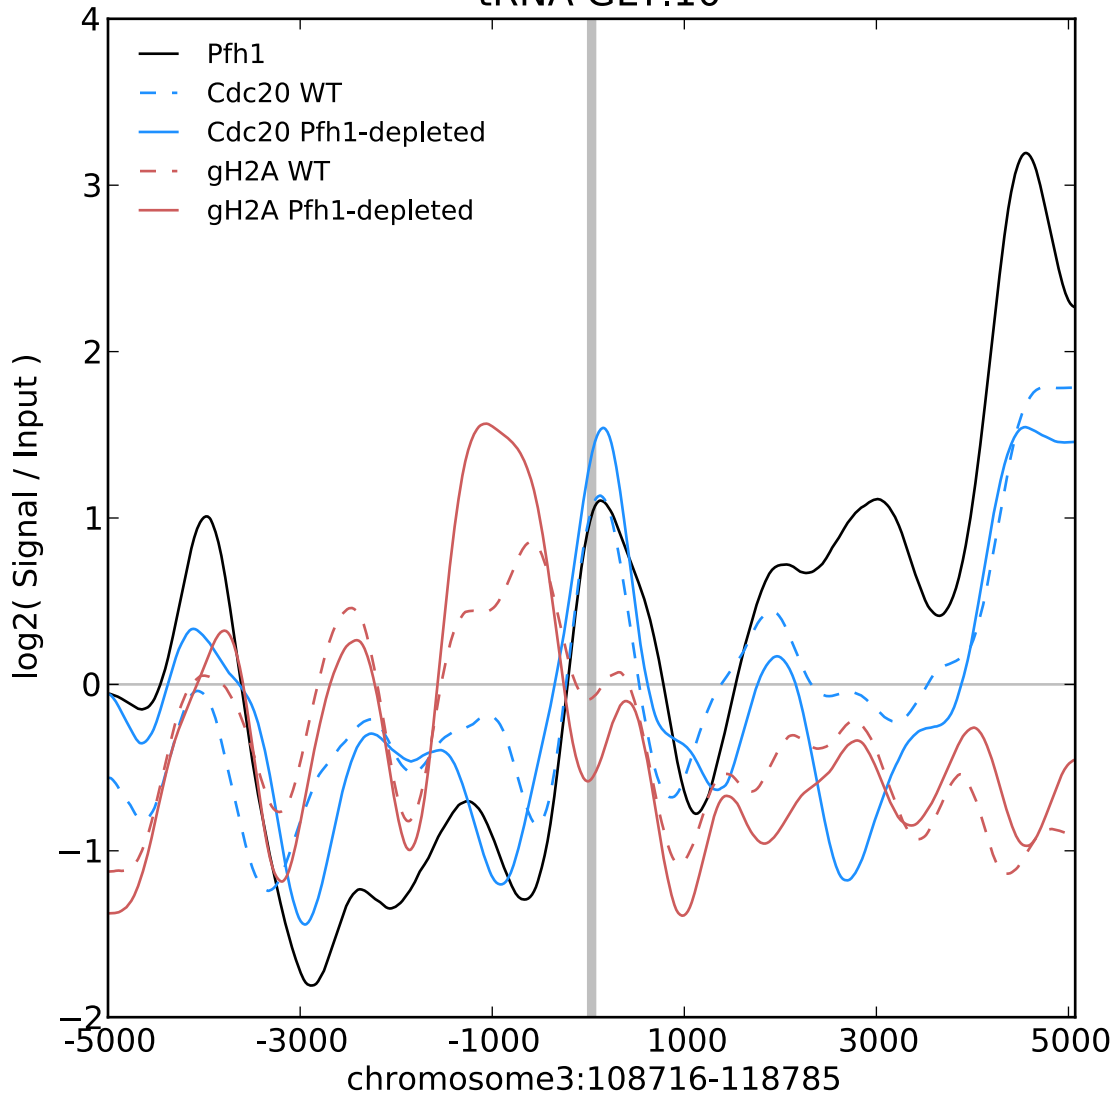

# tRNA GLY.11

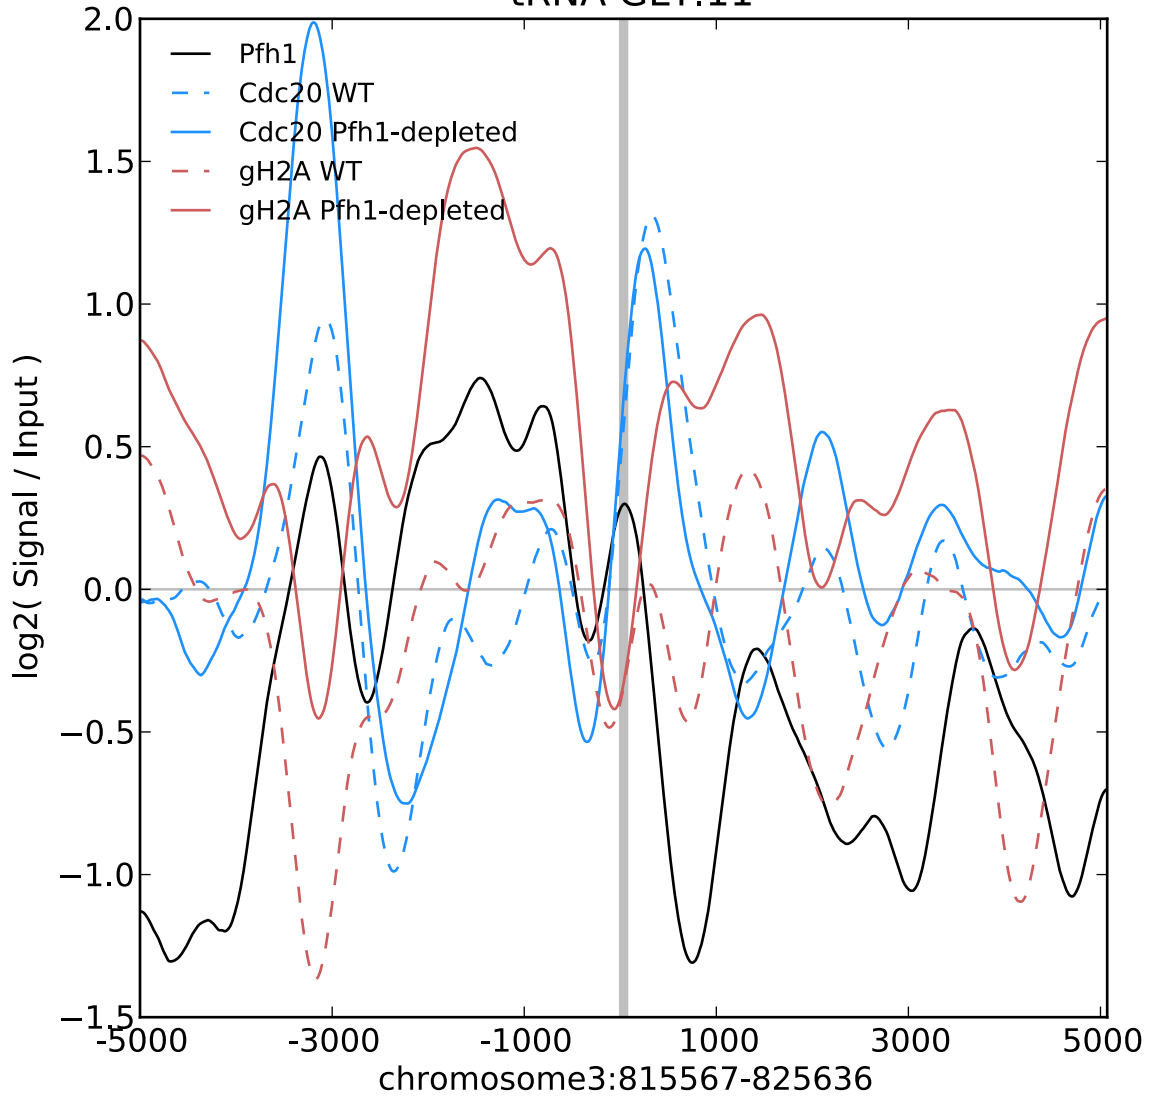

# tRNA GLY.12

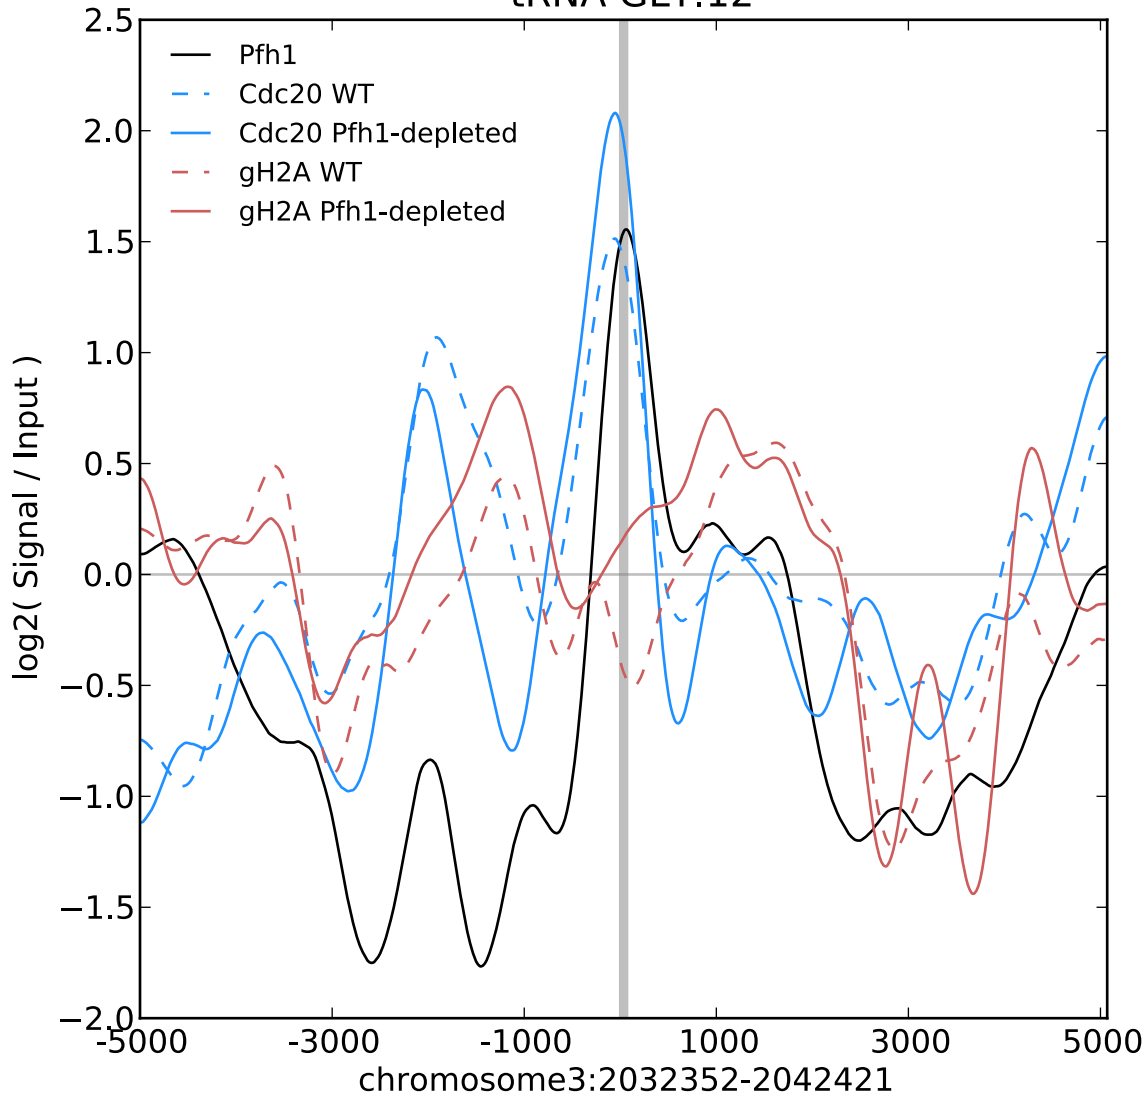

# tRNA HIS.03

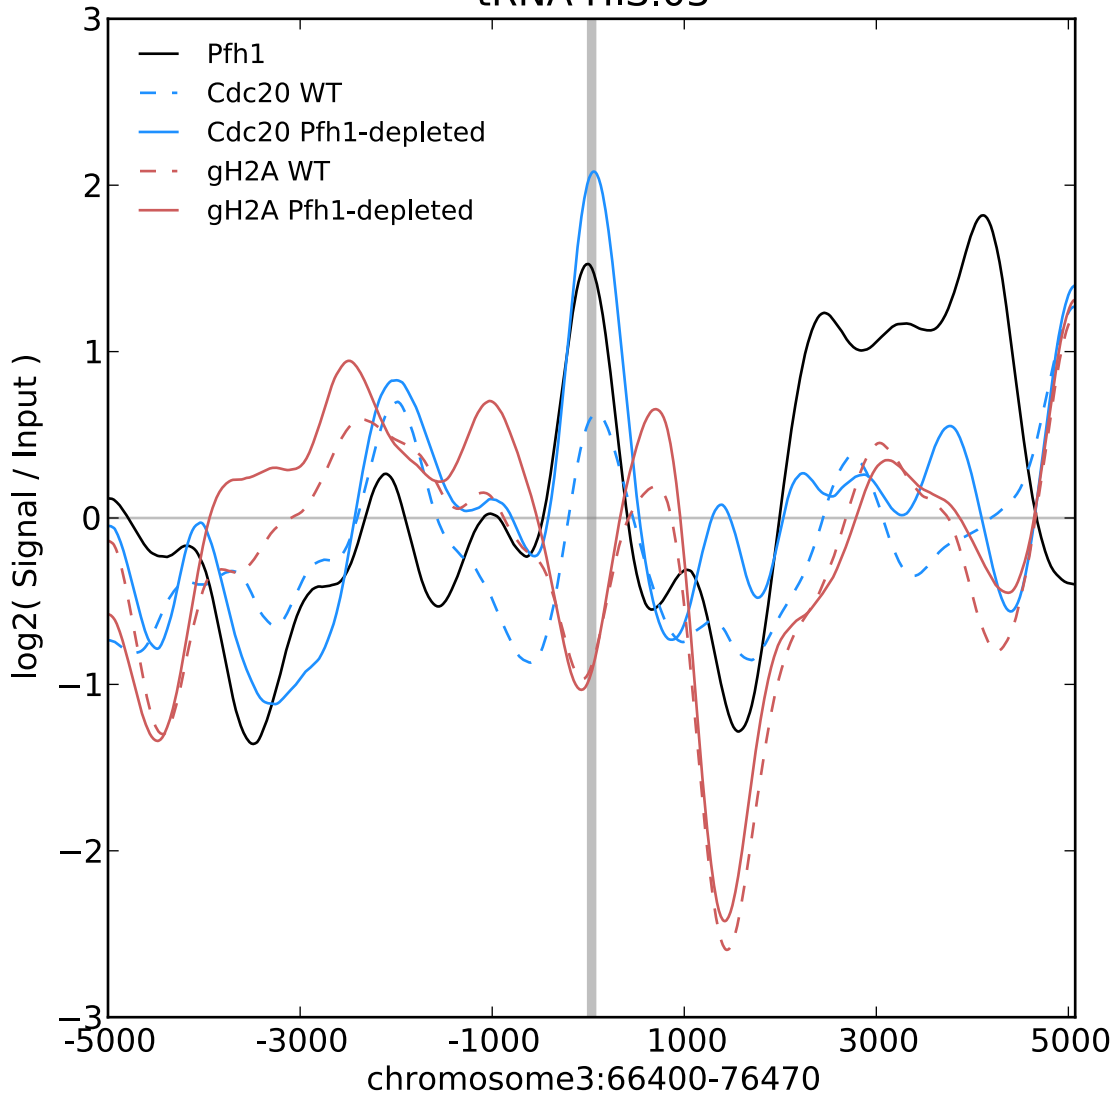

# tRNA HIS.04

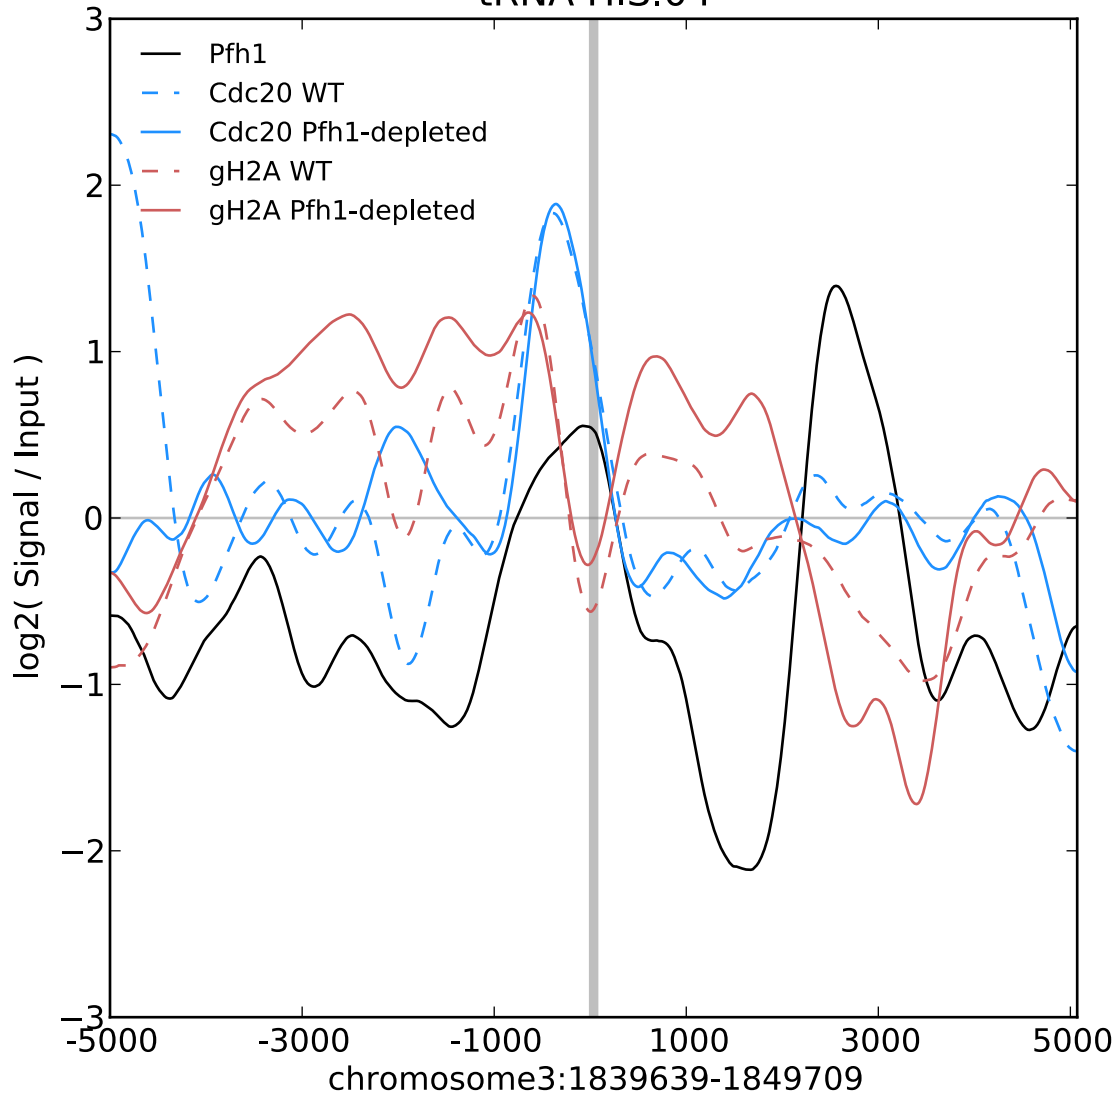

# tRNA ILE.09

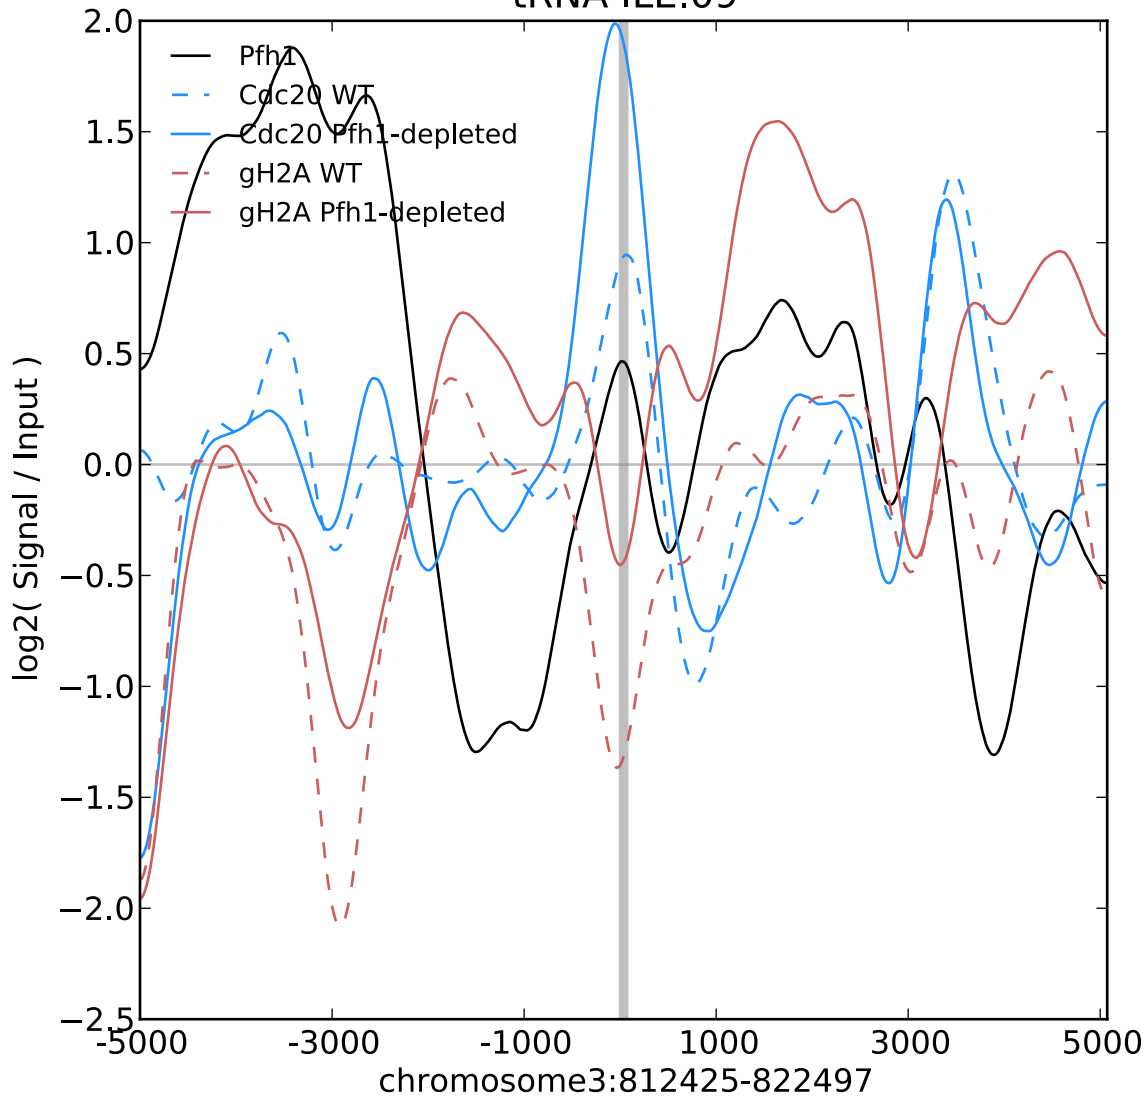

# tRNA LEU.11

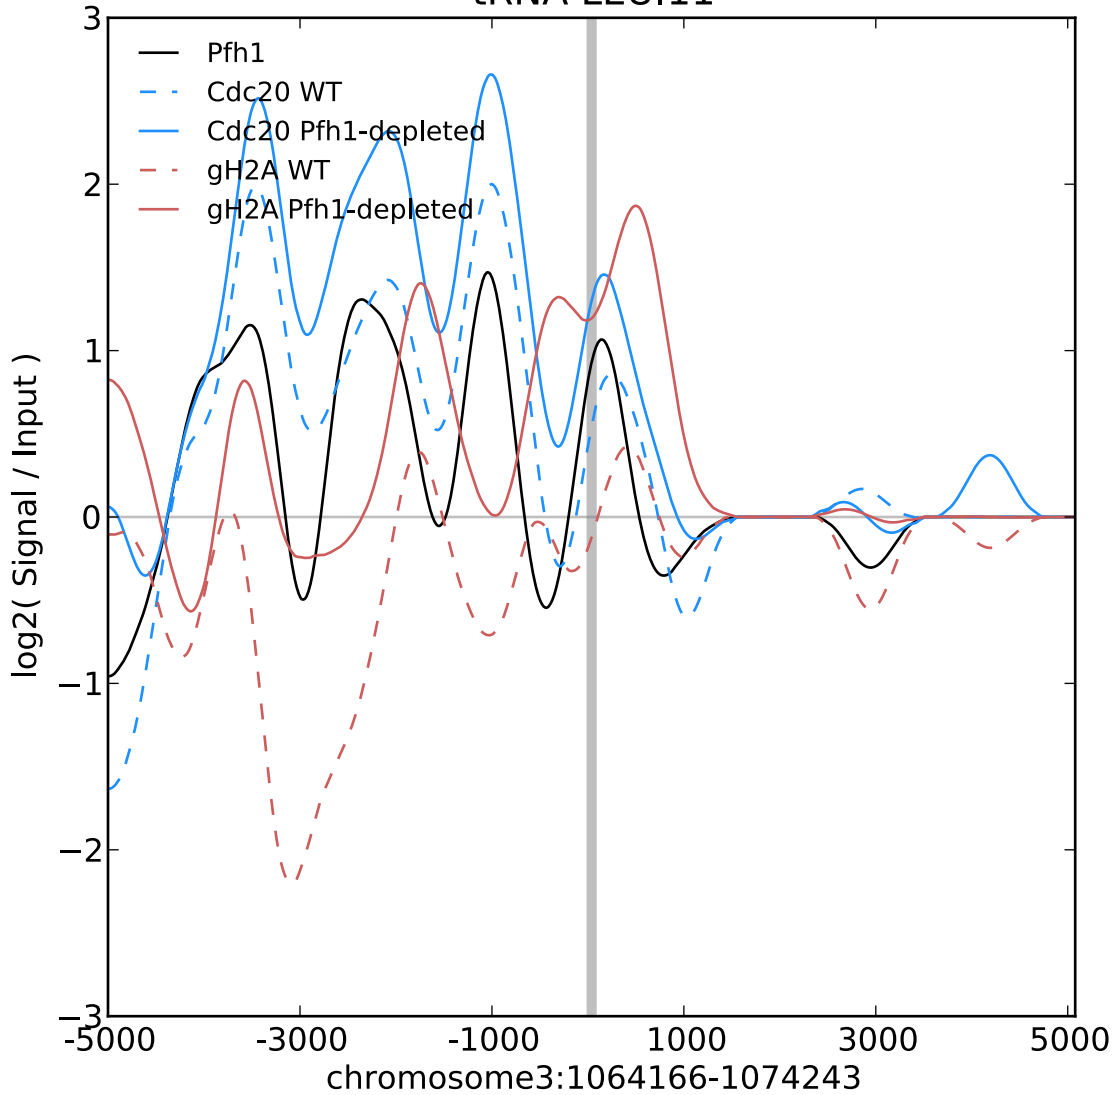



# tRNA LEU.12

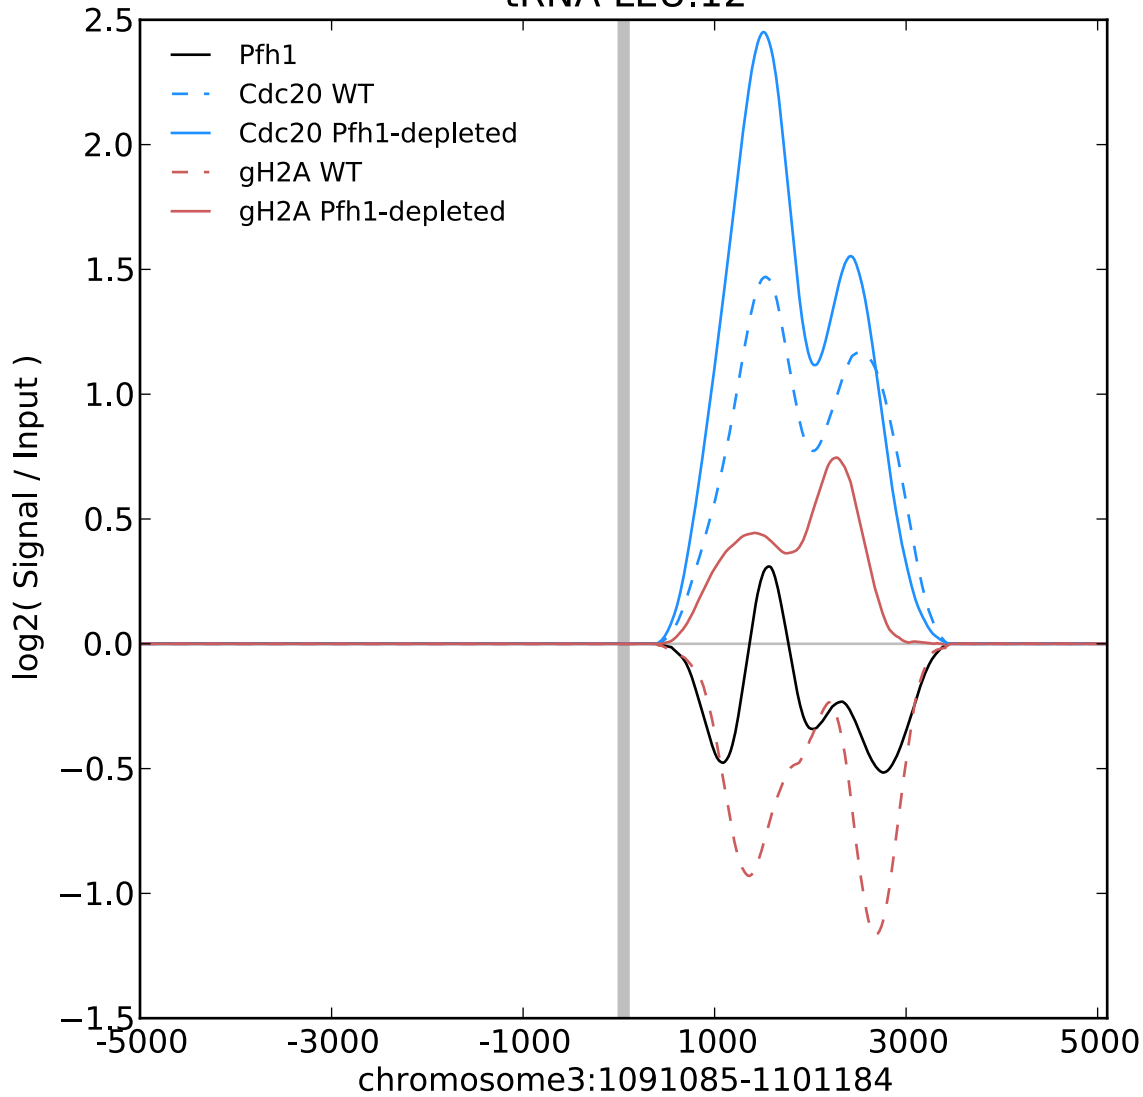

# tRNA LEU.13

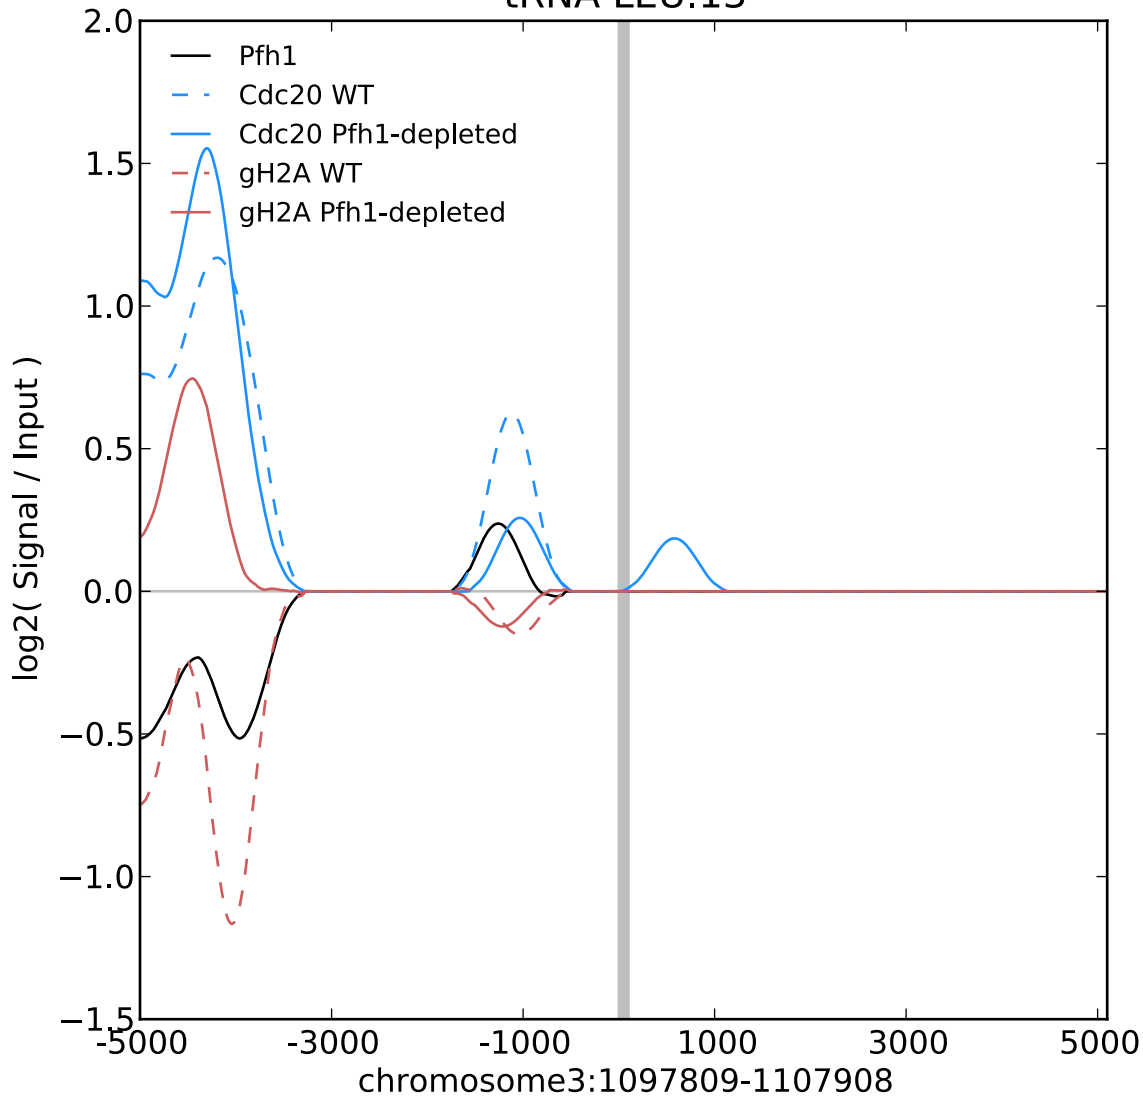

# tRNA LYS.10

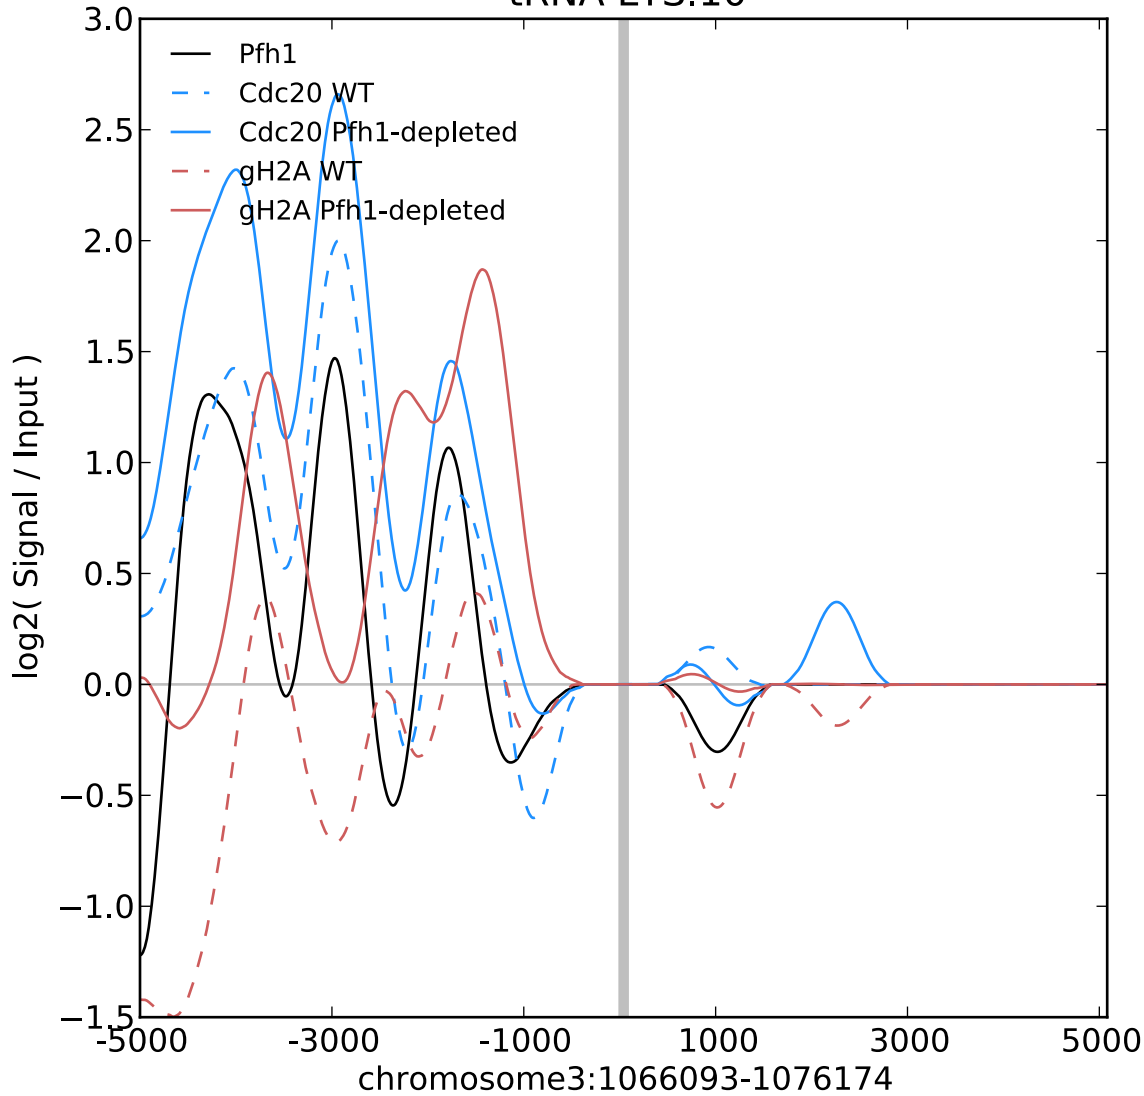

# tRNA LYS.11

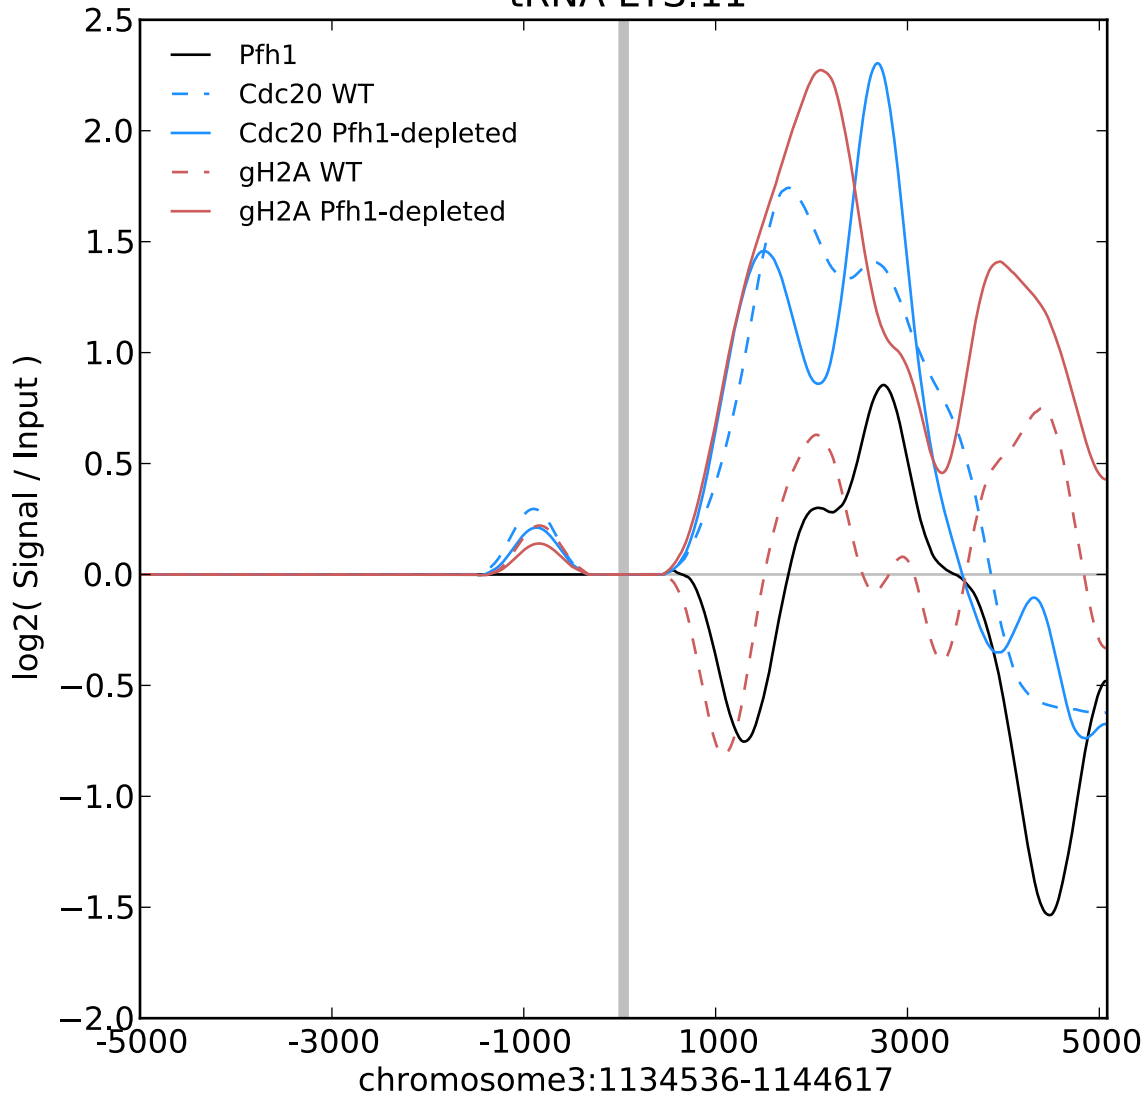

# tRNA LYS.12

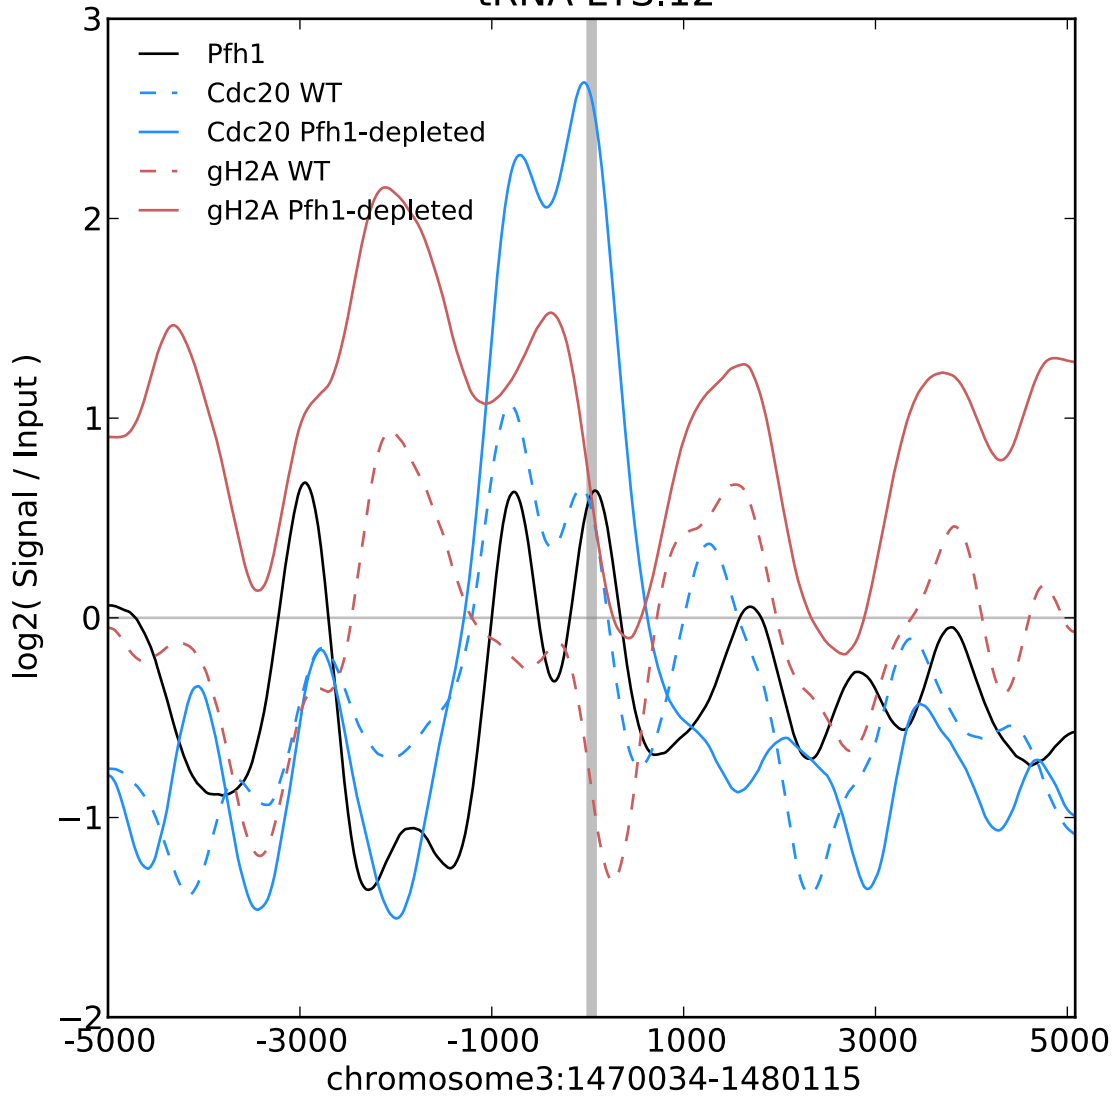

# tRNA MET.07

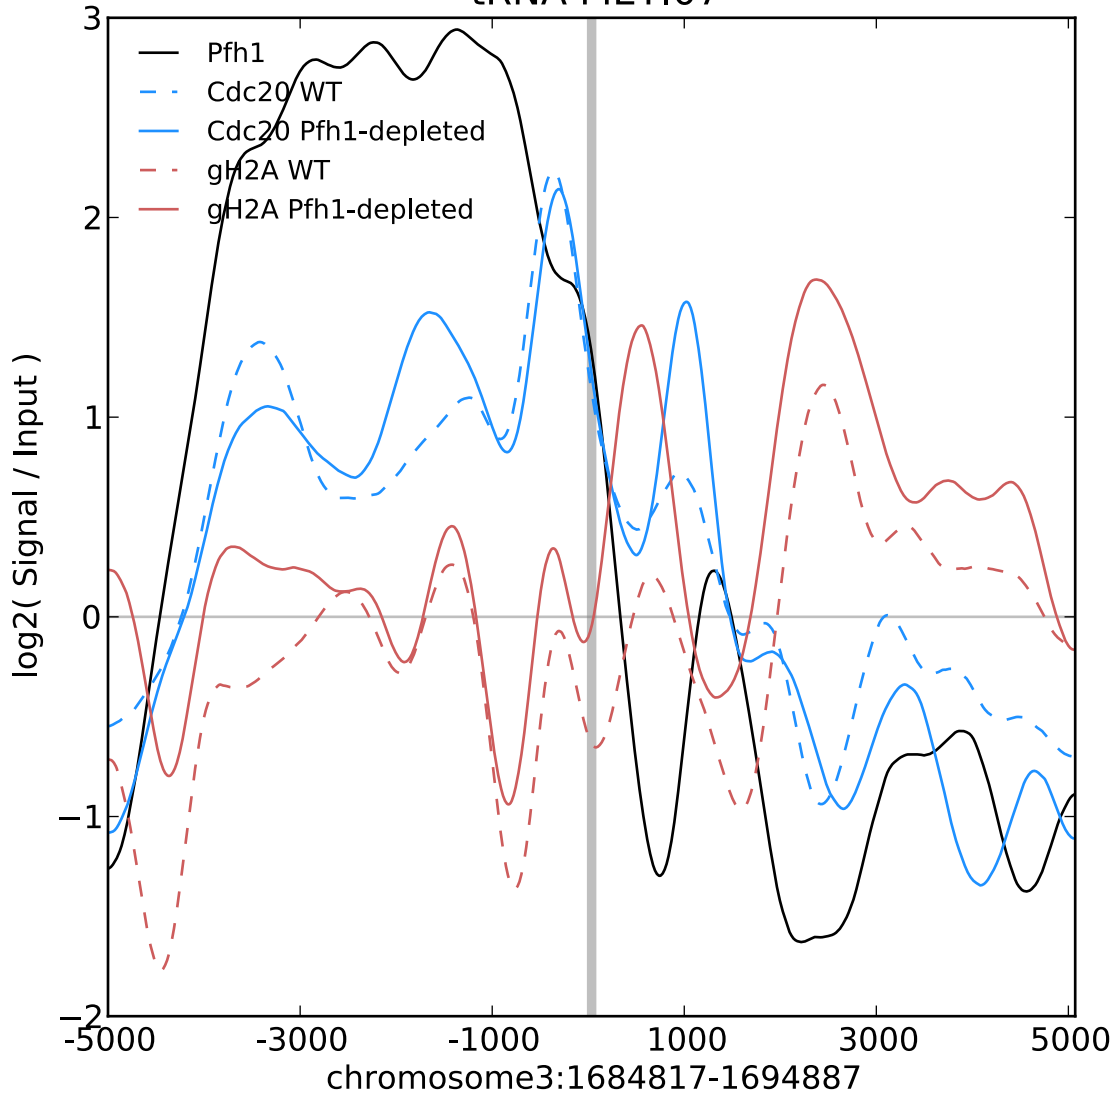

# tRNA PHE.04

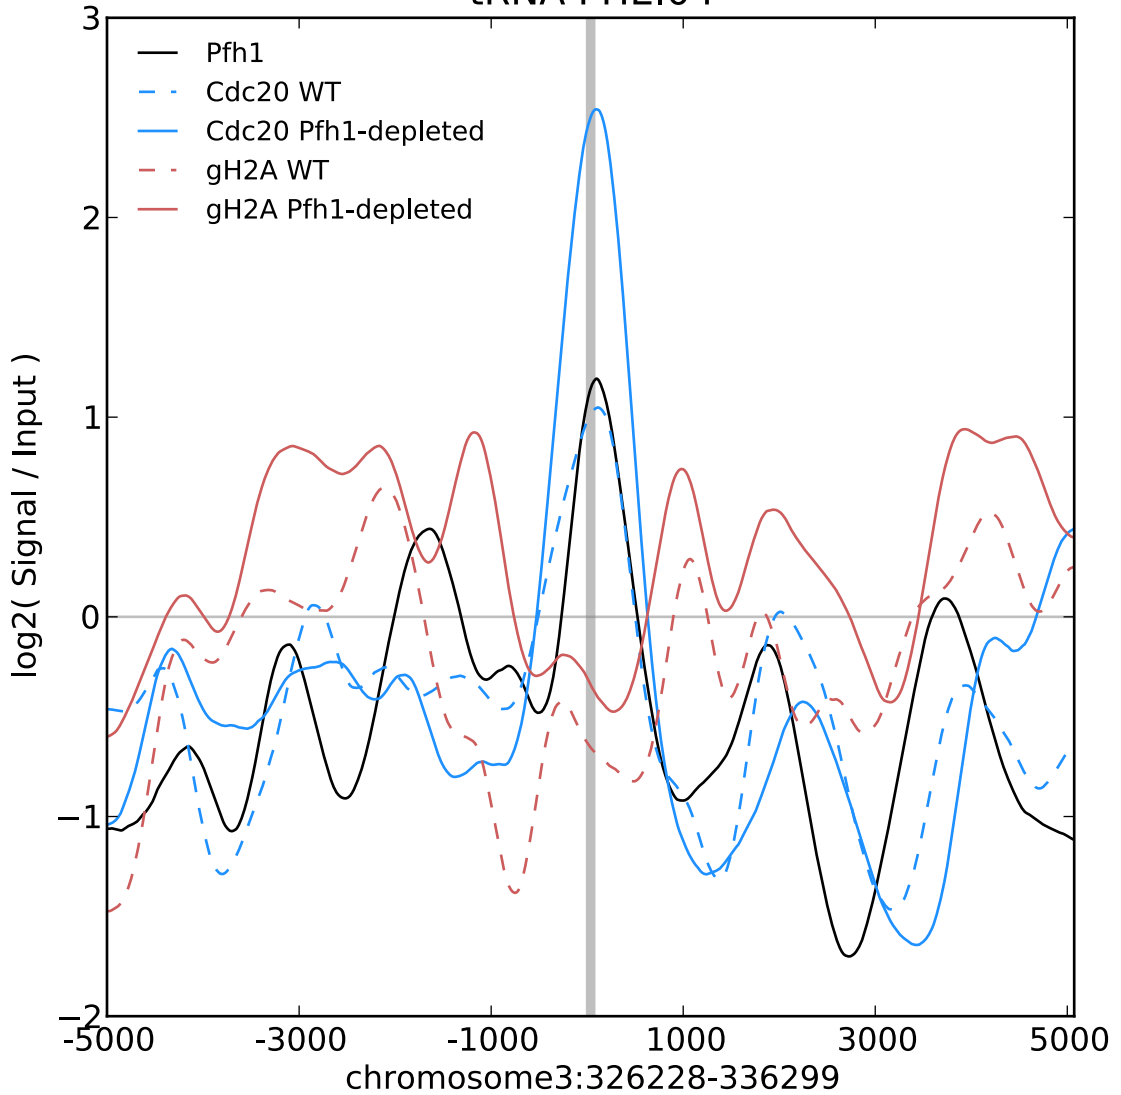

# tRNA PHE.05

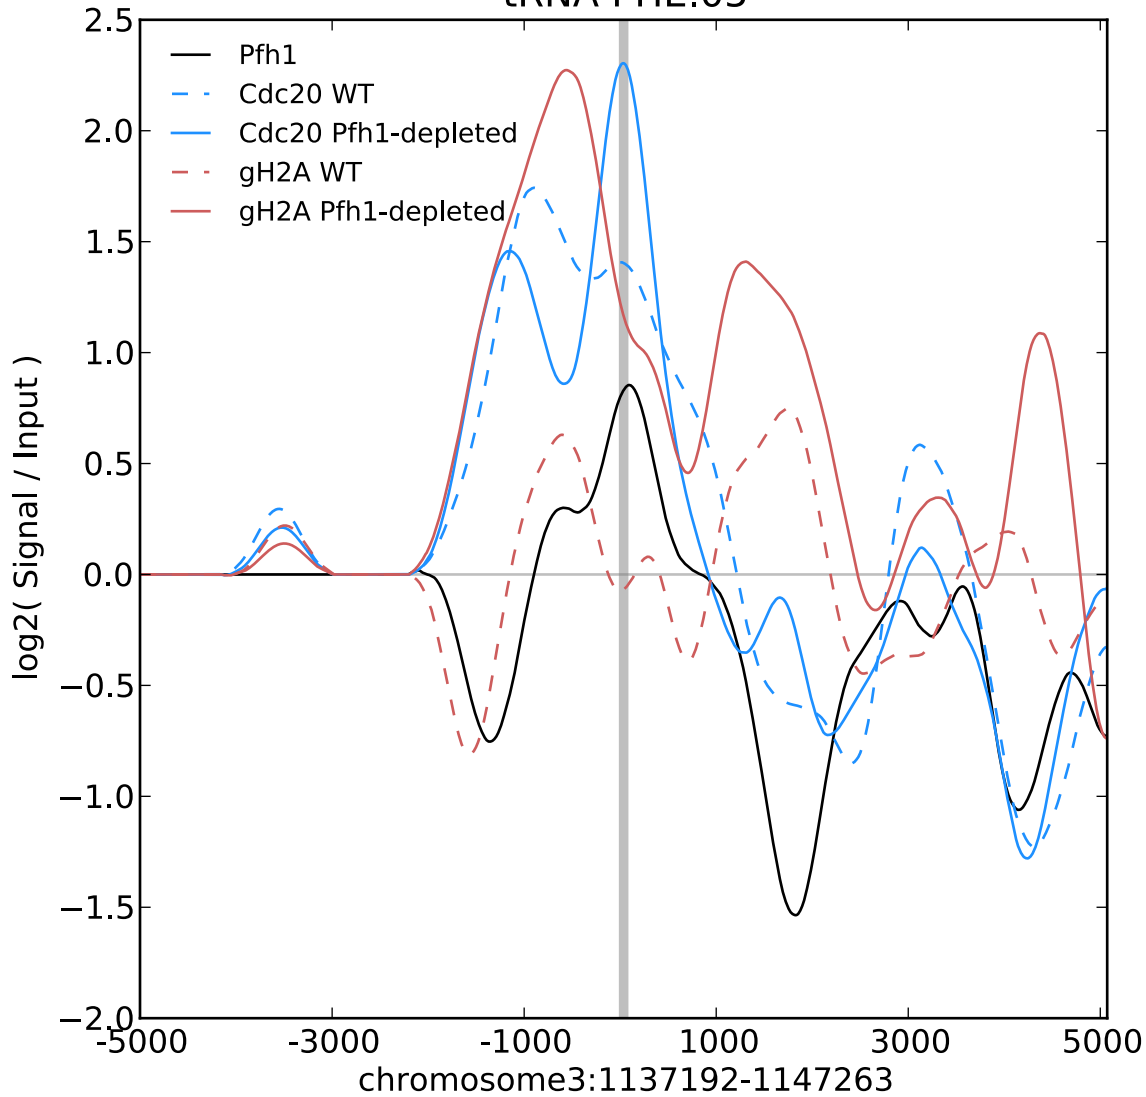



# tRNA PRO.09

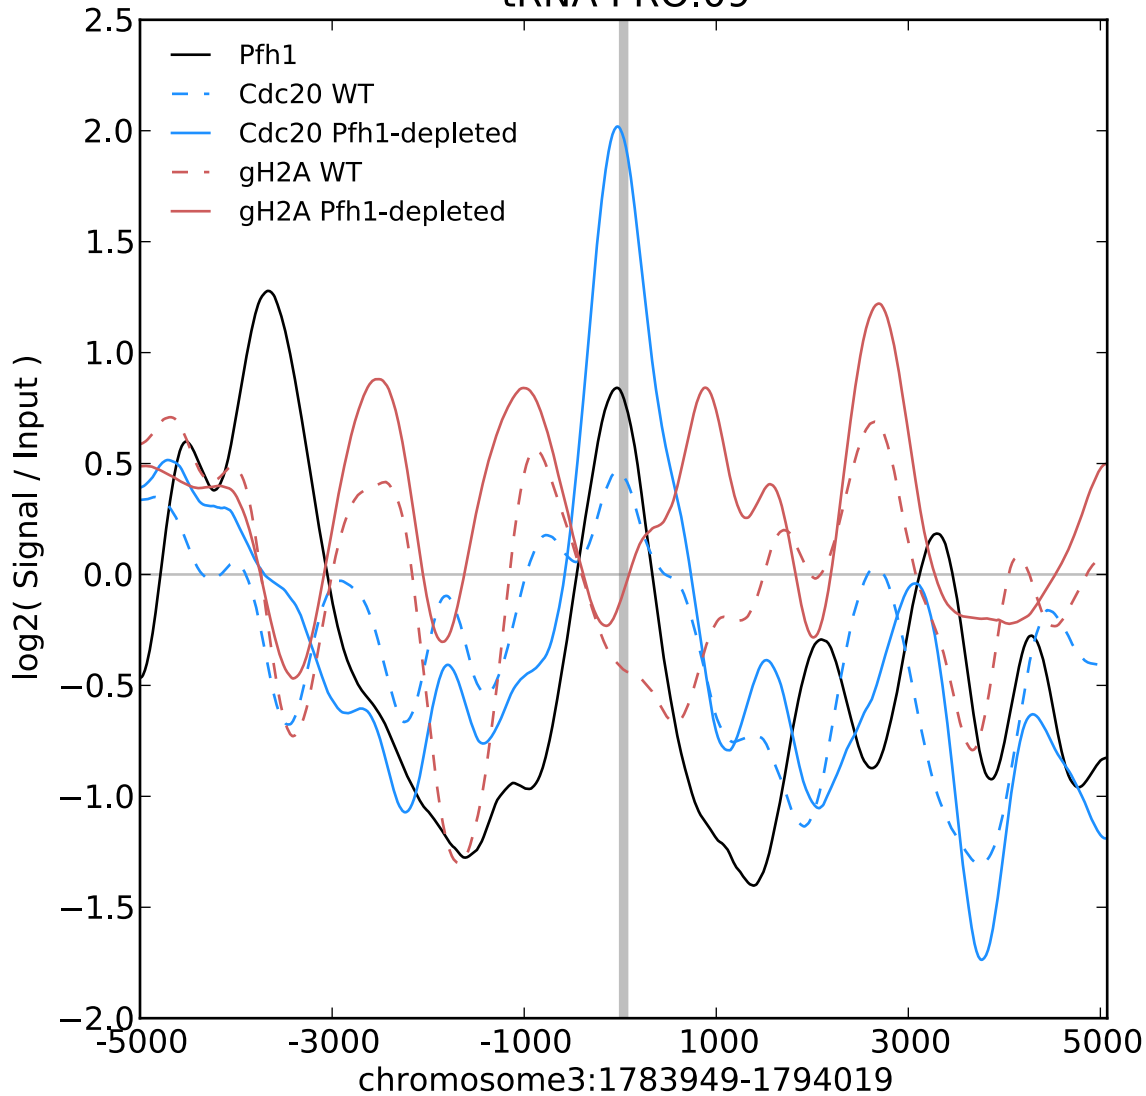

# tRNA SER.07

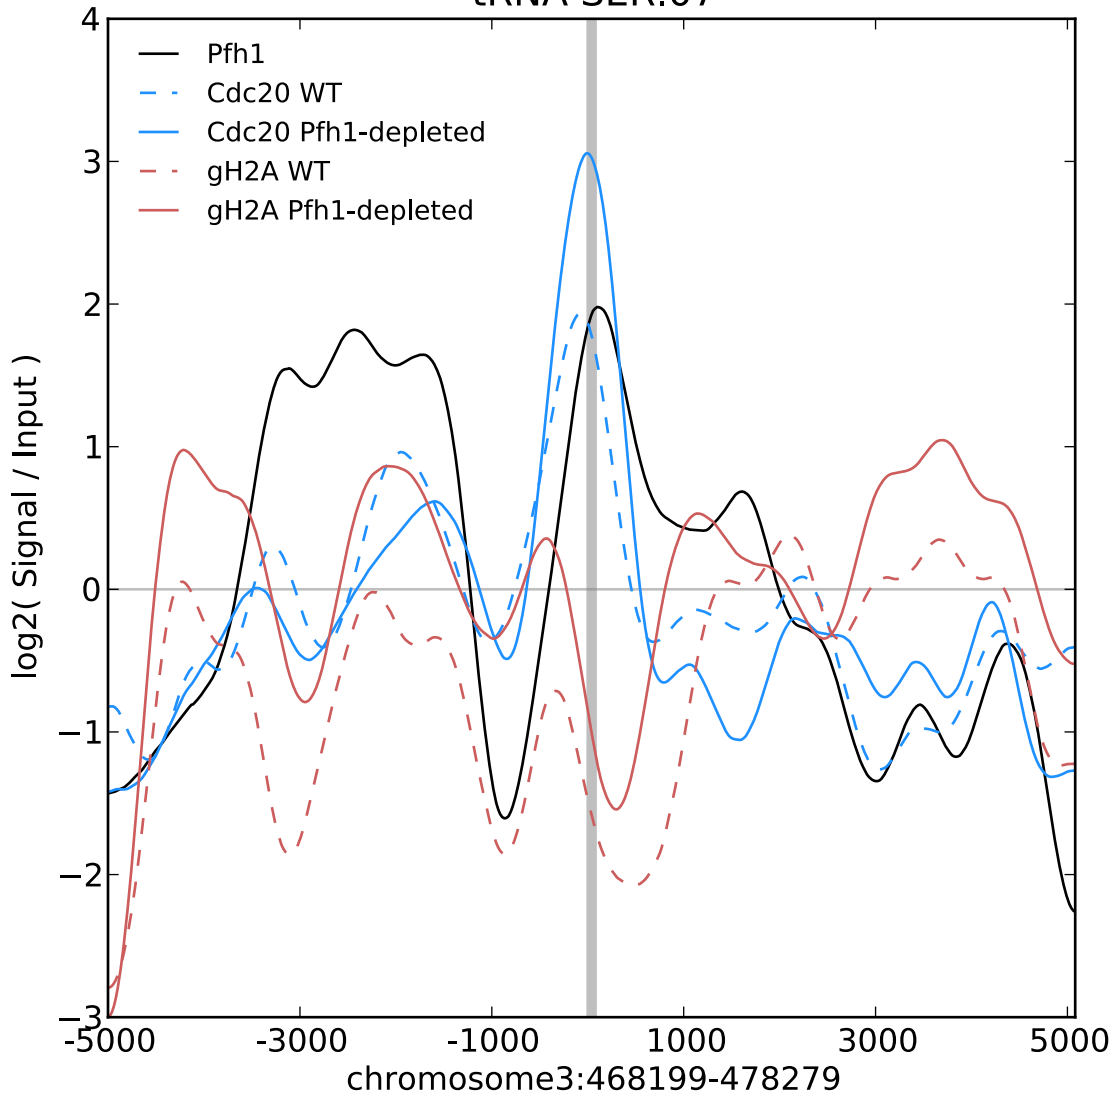

# tRNA SER.08

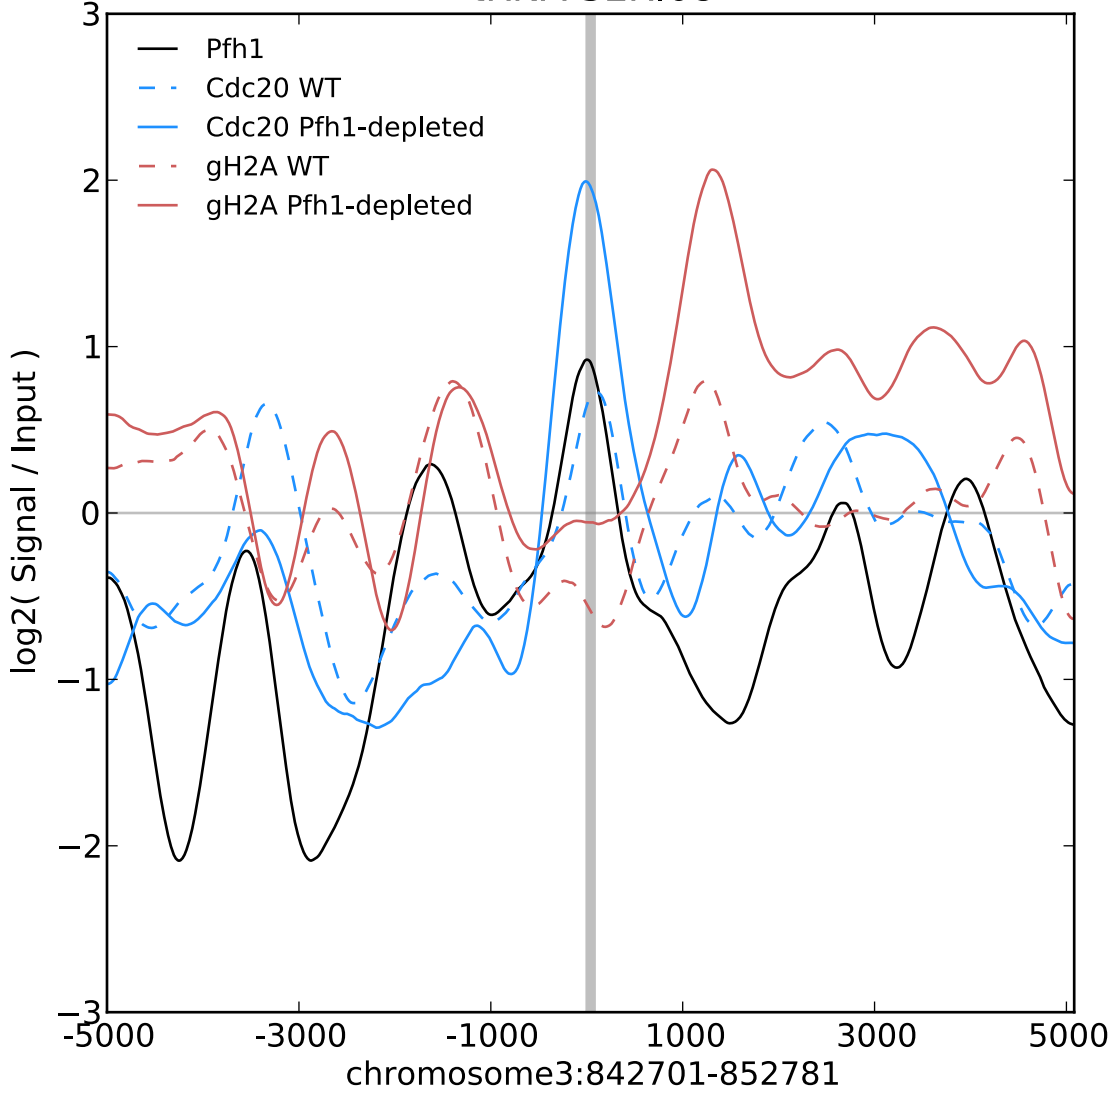

# tRNA SER.09

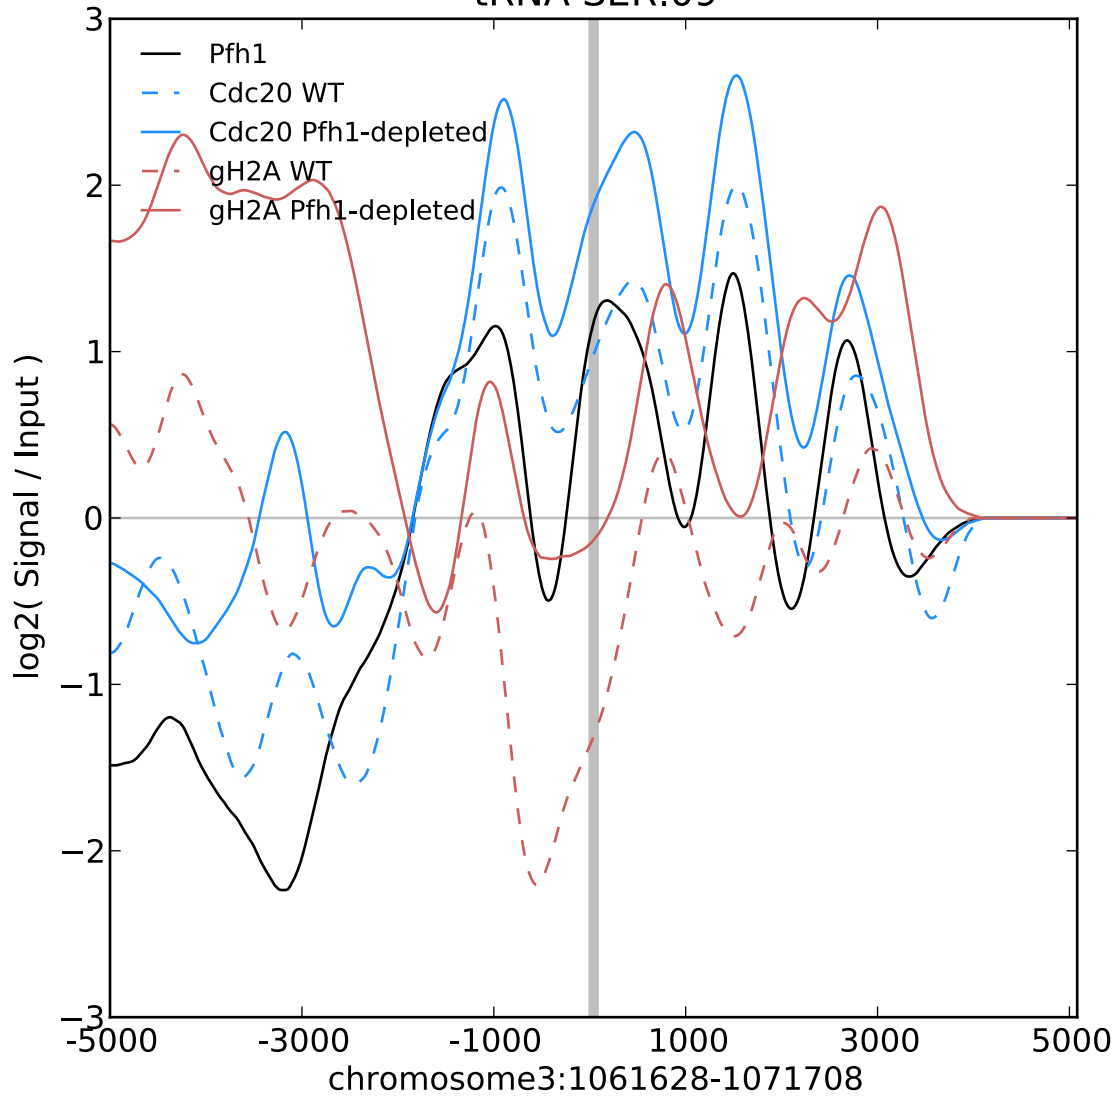

# tRNA SER.10

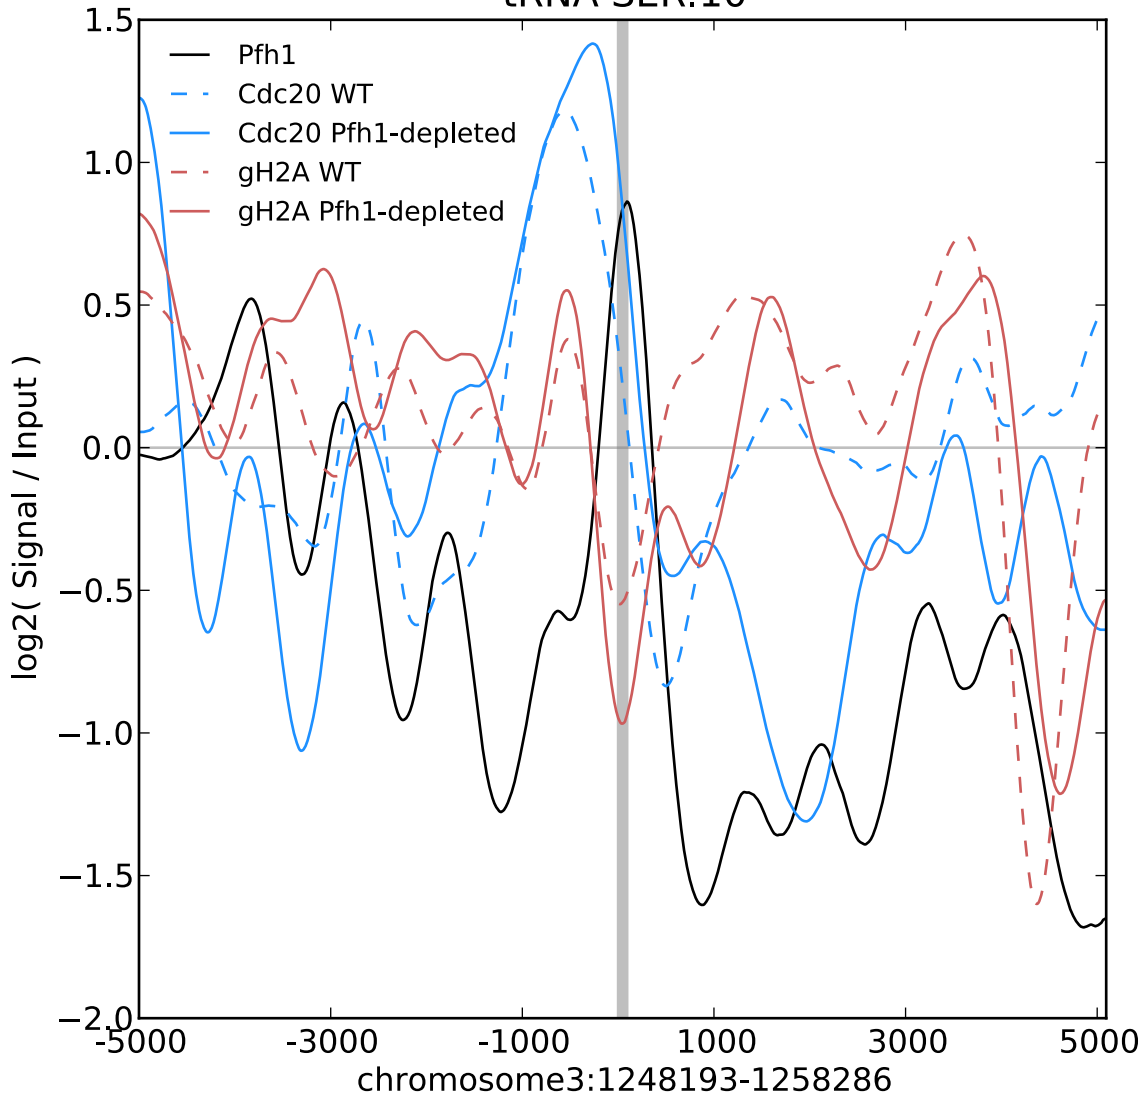

# tRNA SER.11

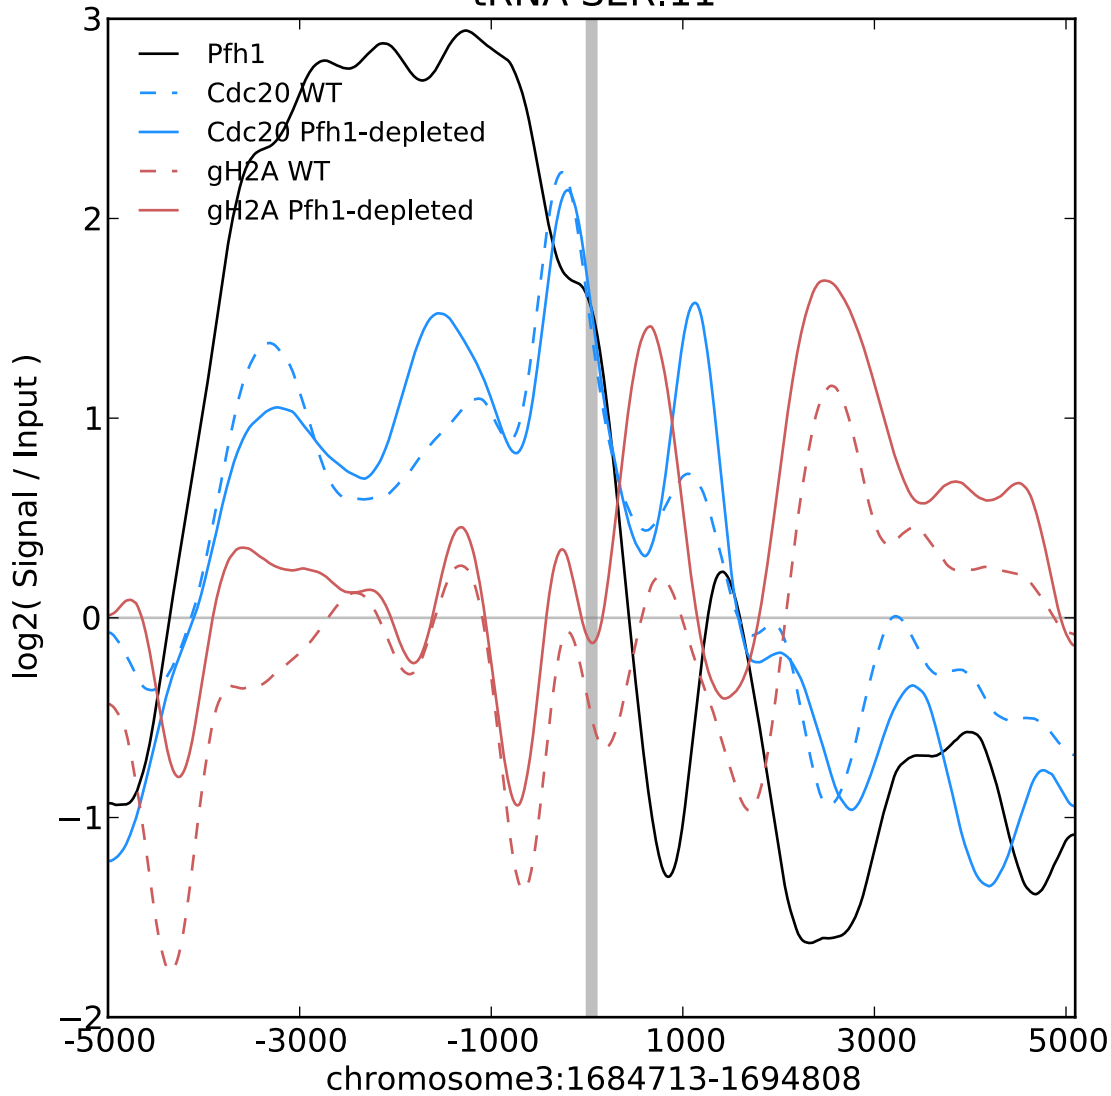

tRNA SER.12

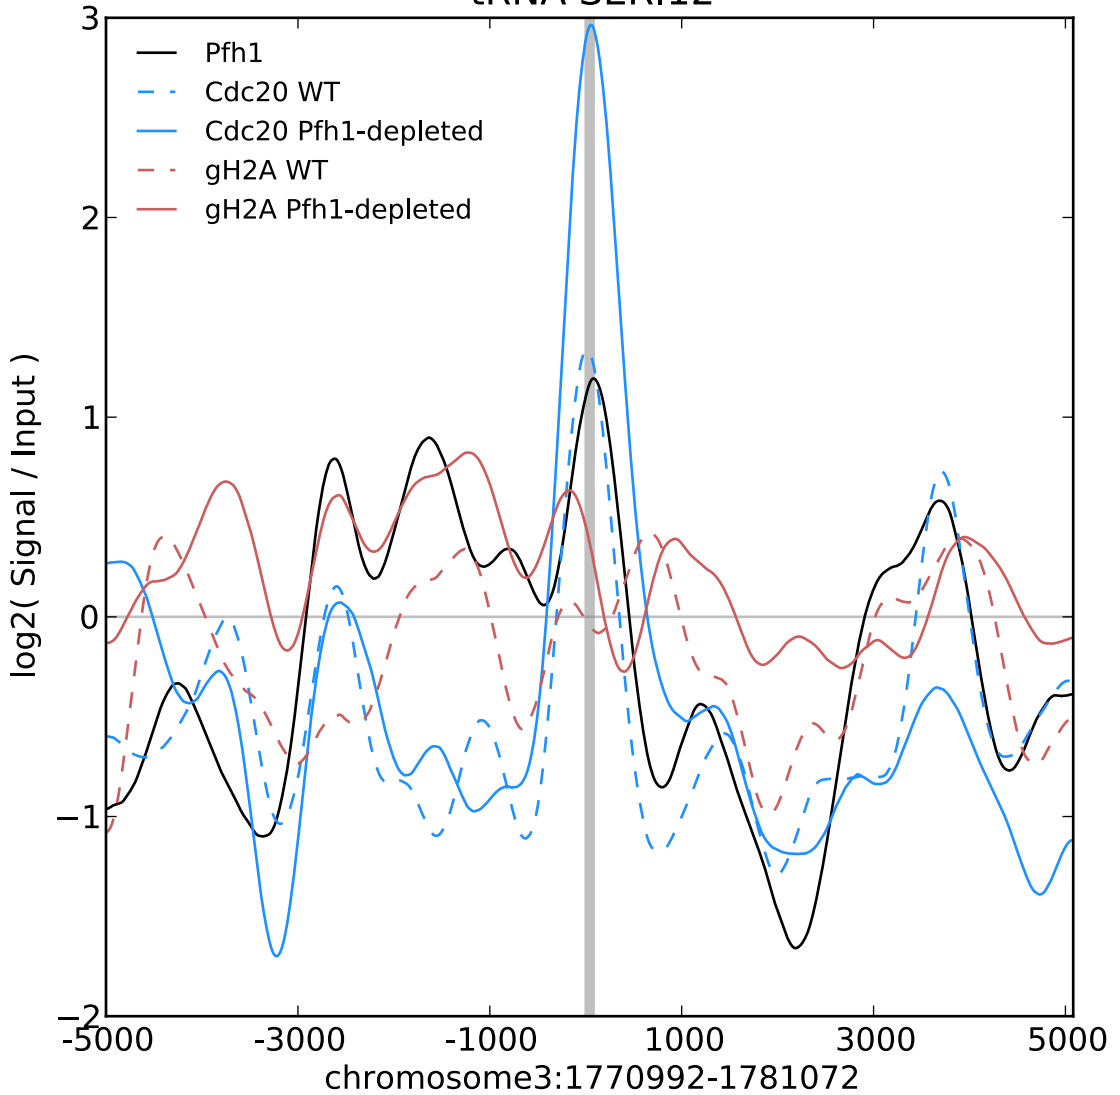

# tRNA SER.13

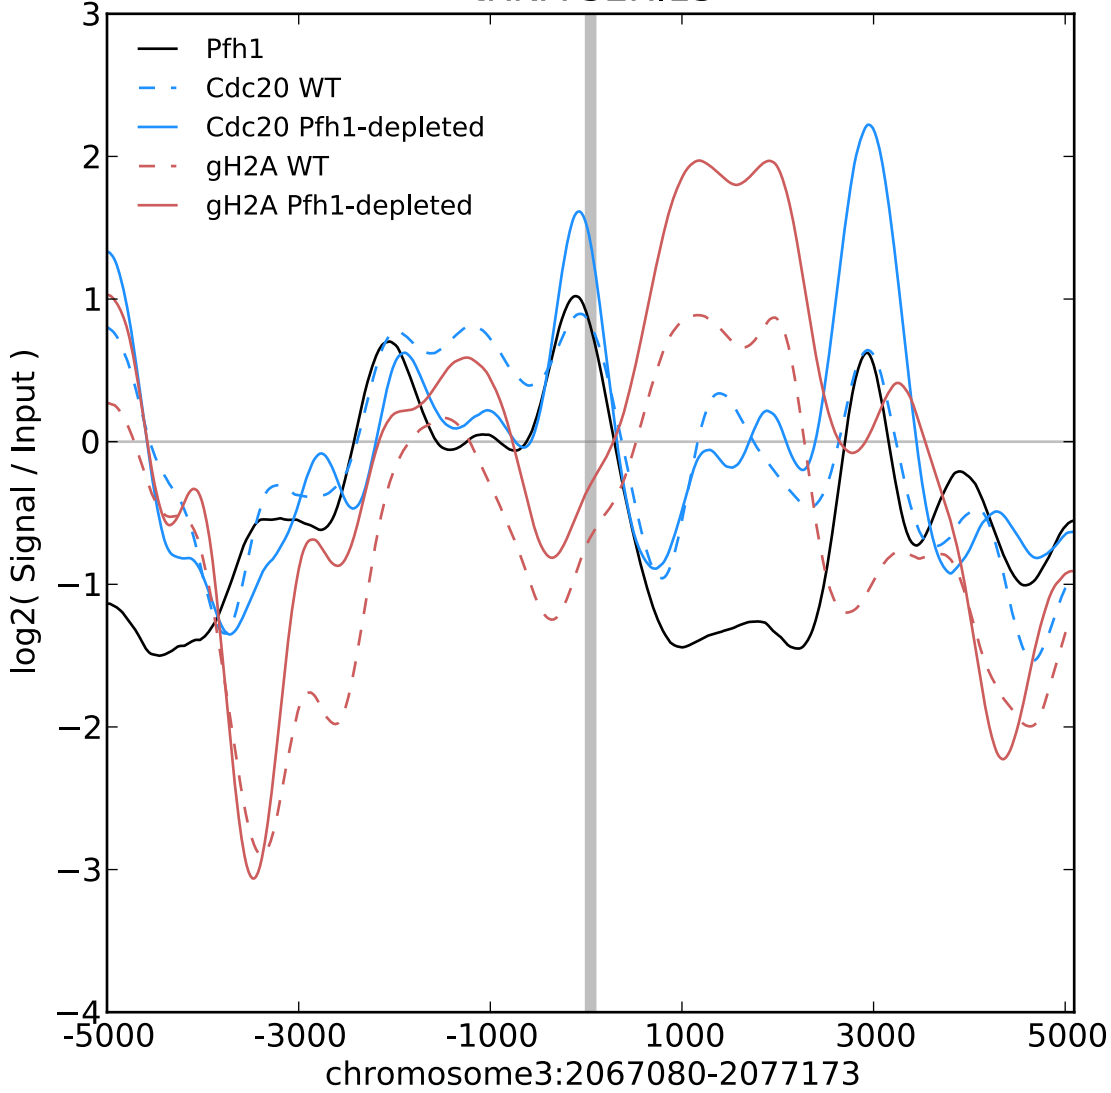



# tRNA THR.08

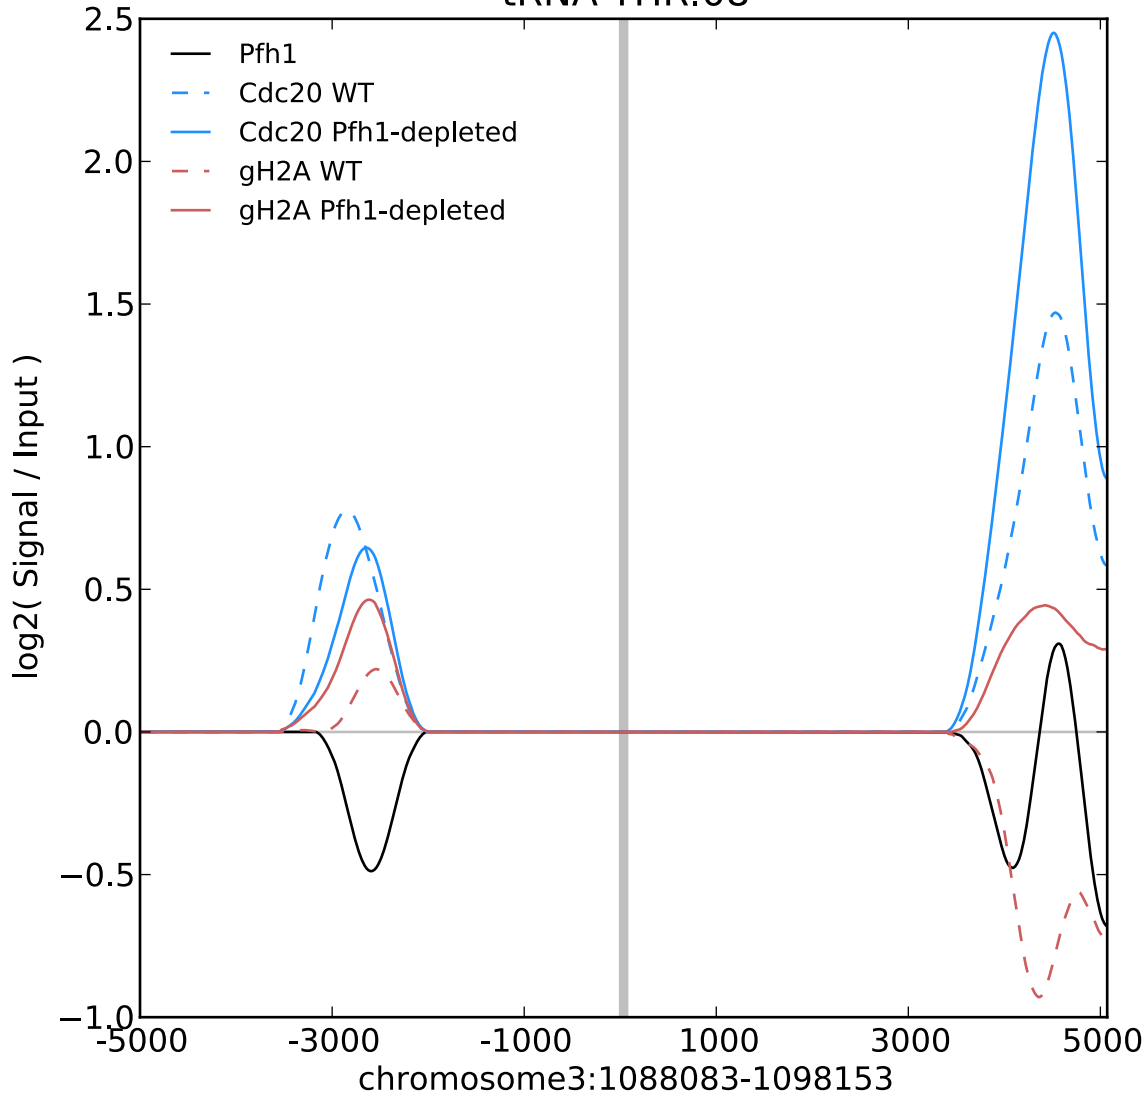

# tRNA THR.09

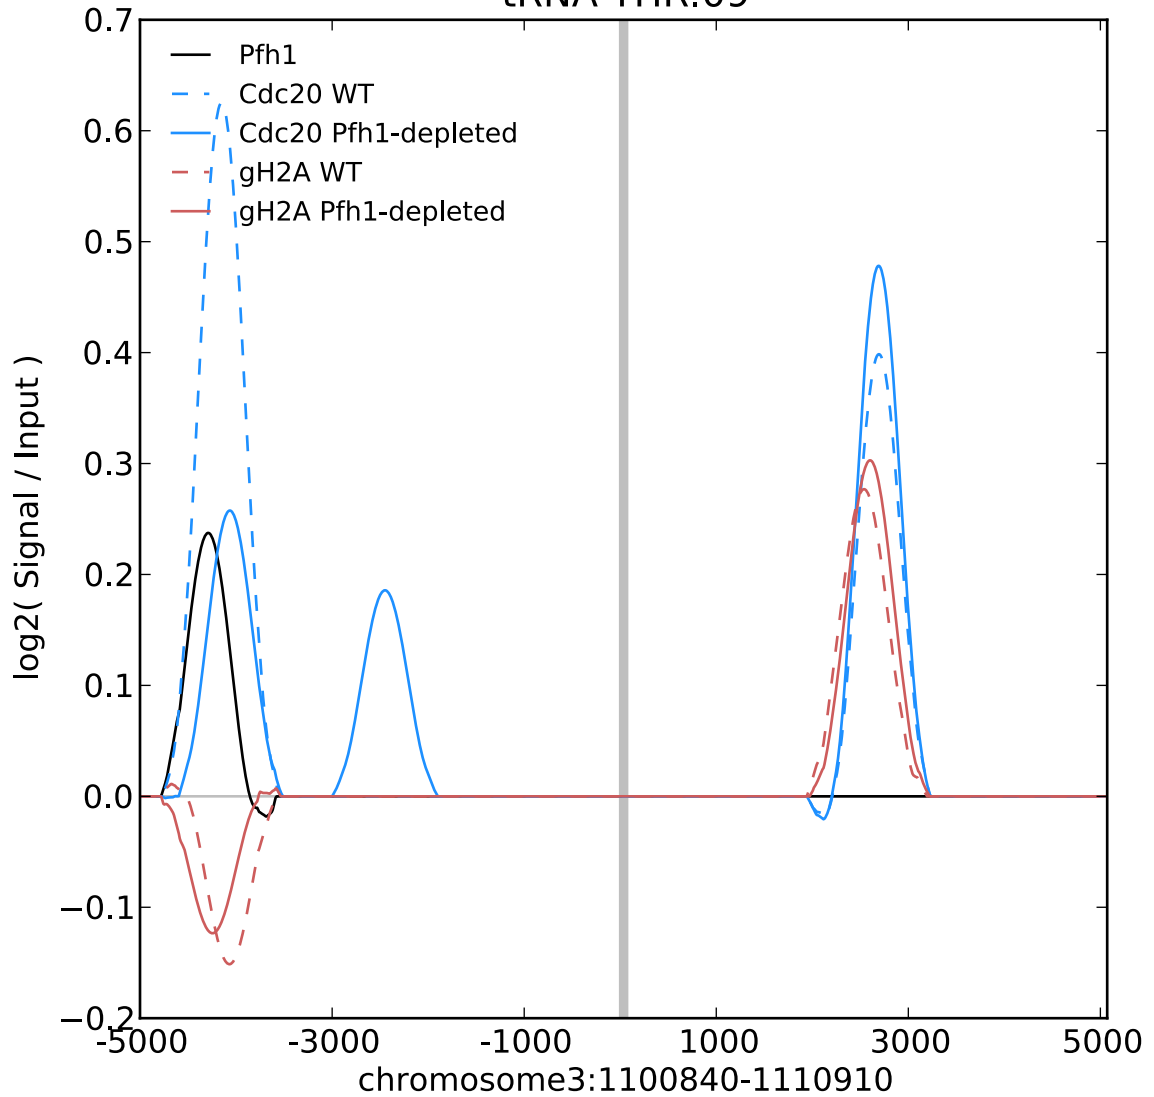

# tRNA THR.10

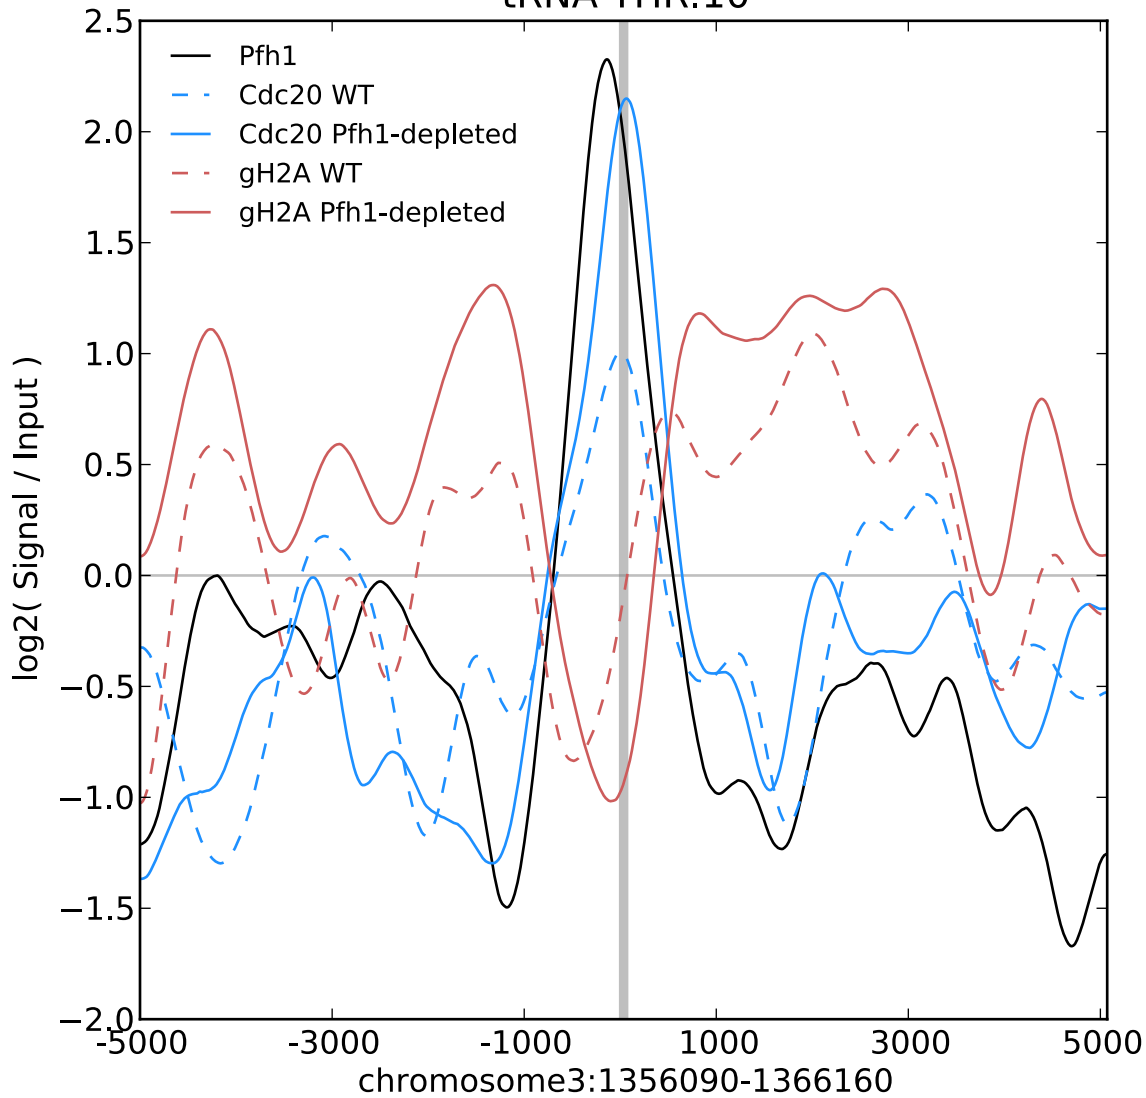

# tRNA VAL.09

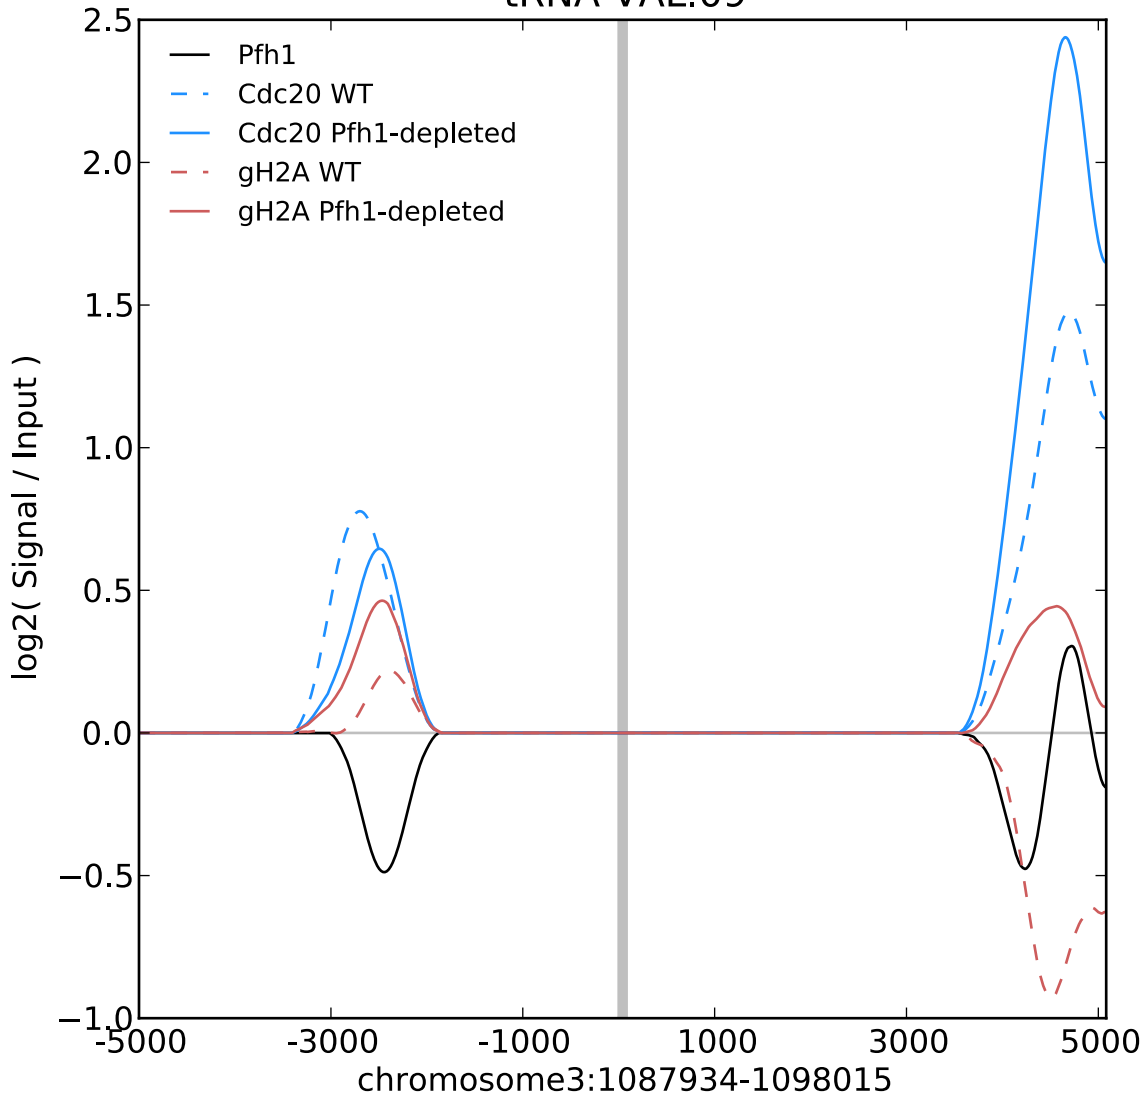

# tRNA VAL.10

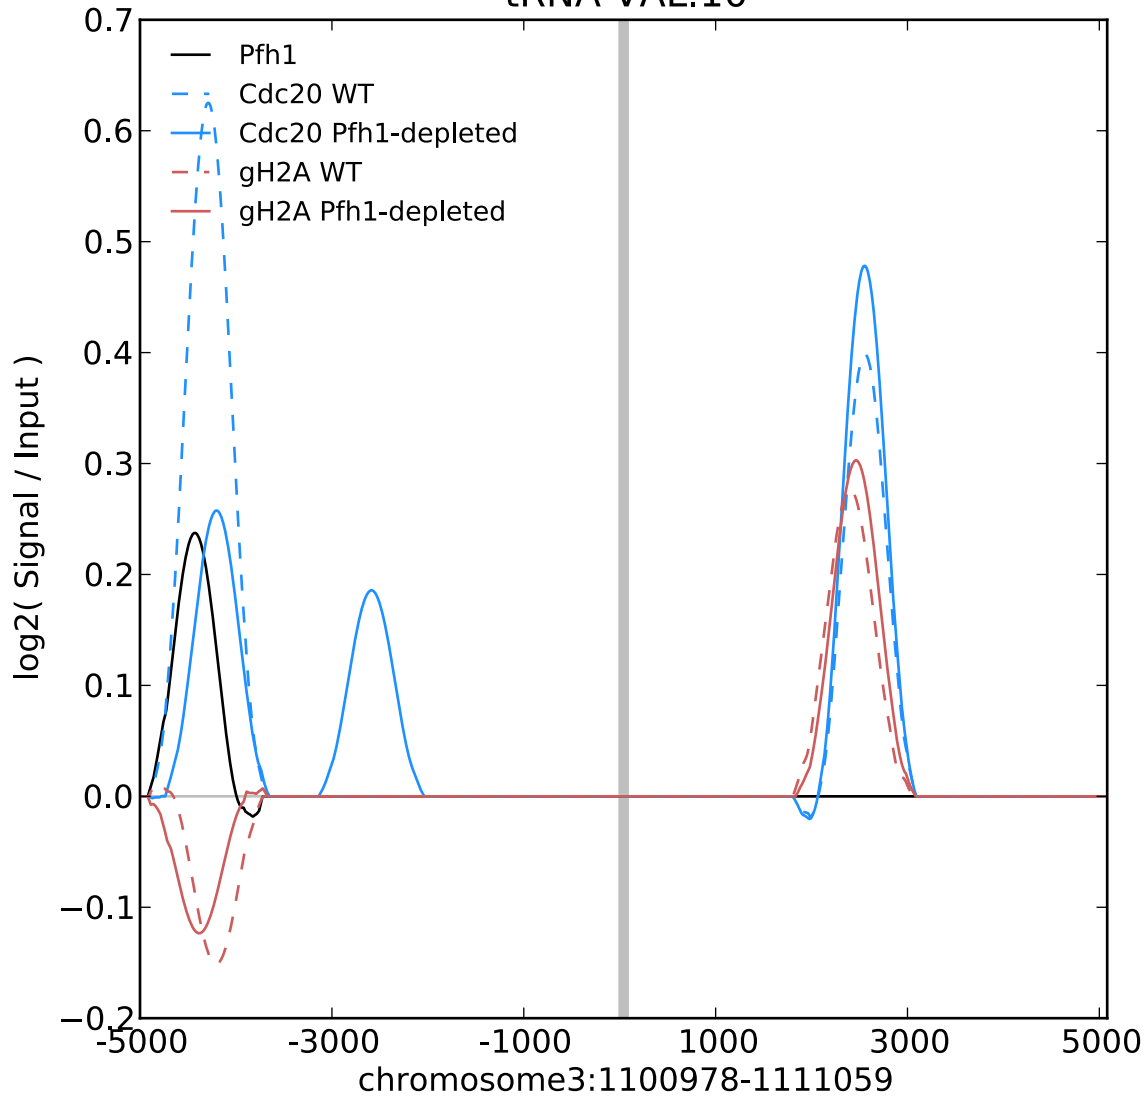

# tRNA VAL.11

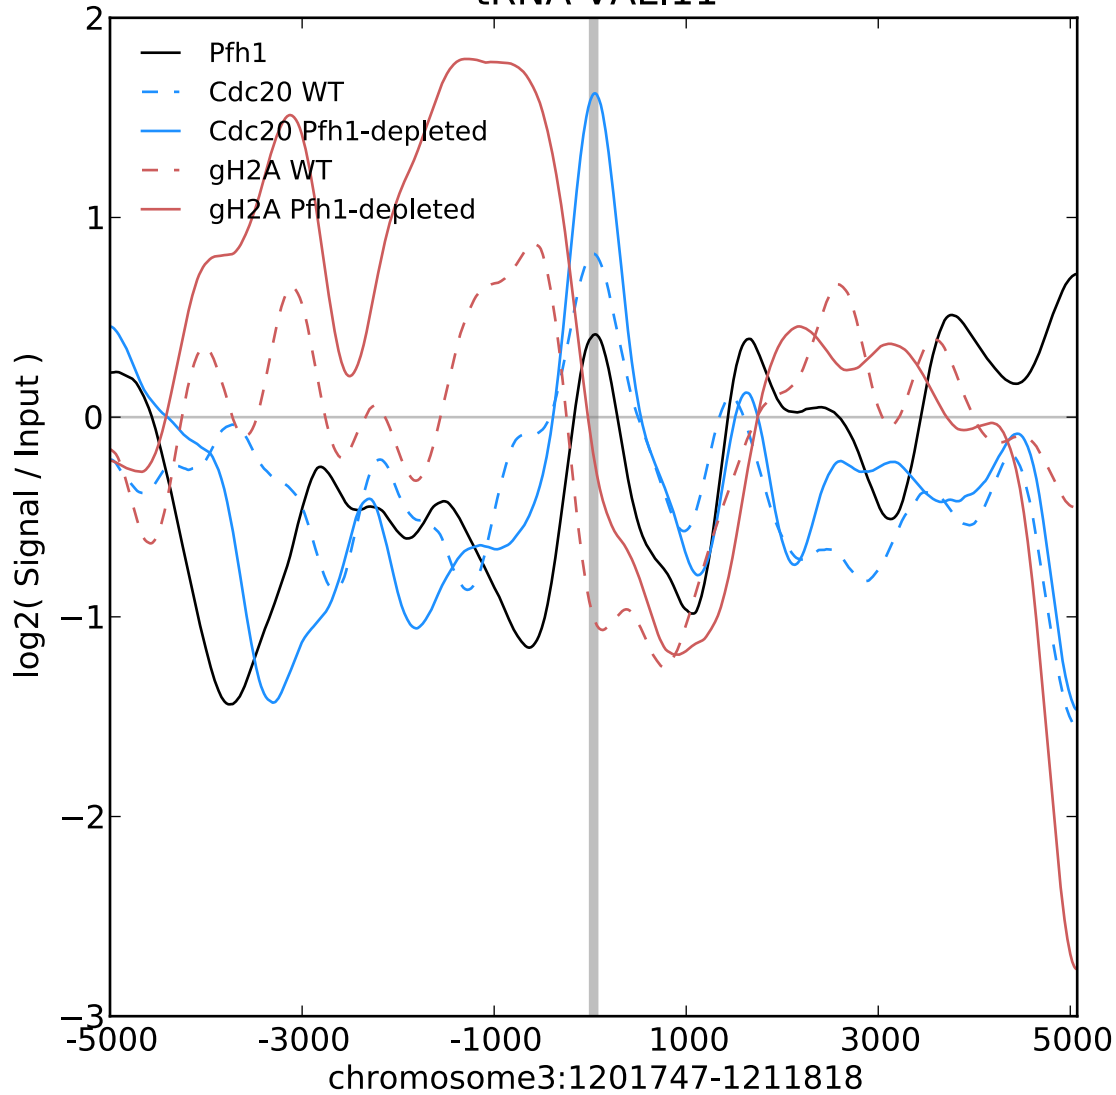

# tRNA VAL.12

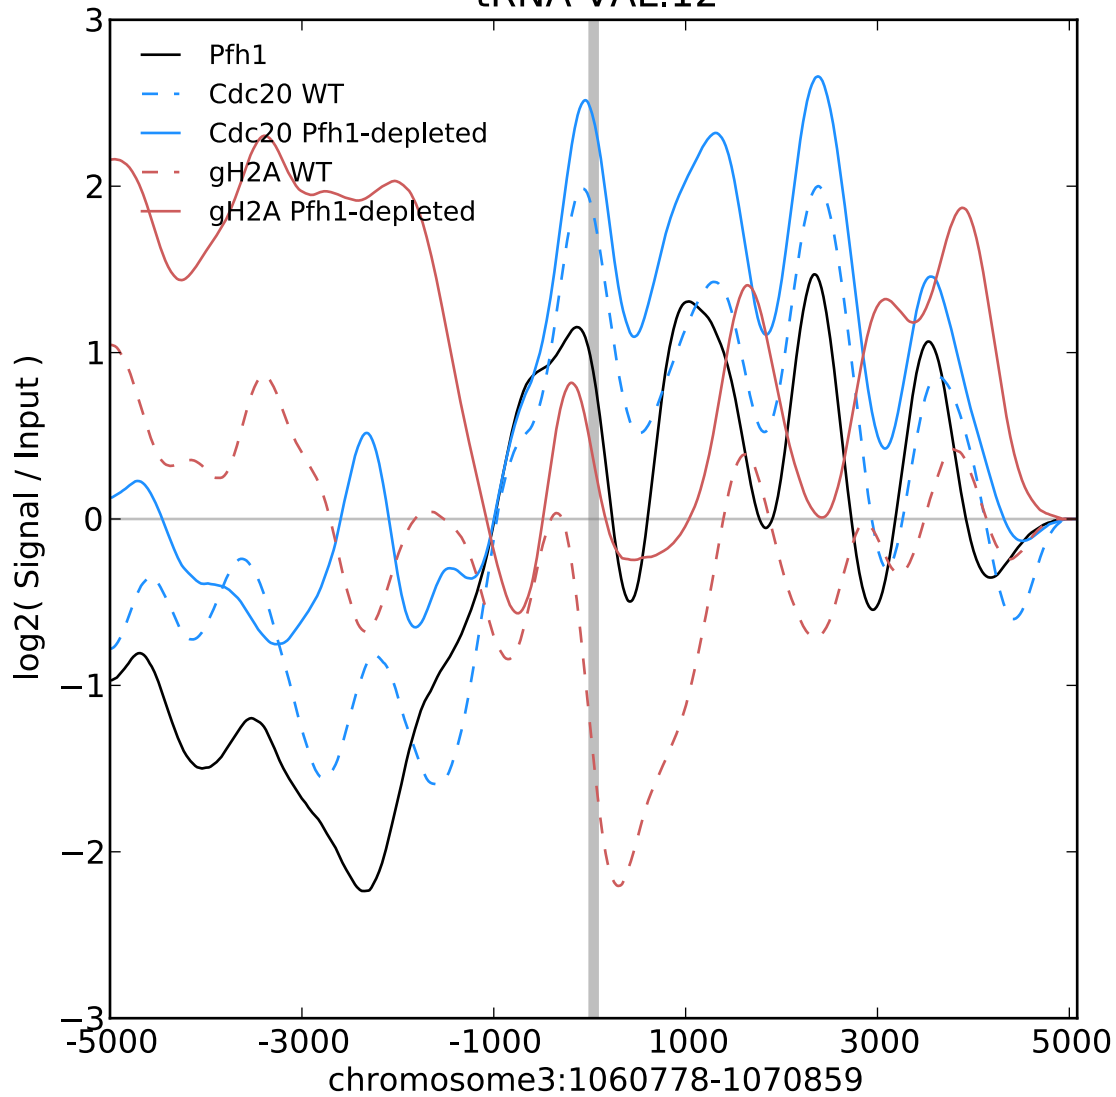

Supplement: pgen.1006238.s003.pdf [file pgen.1006238.s003.pdf]
