# Supplementary material for: Pfh1 Is an Accessory Replicative Helicase that Interacts with the Replisome to Facilitate Fork Progression and Preserve Genome Integrity
Source: PubMed Central journal article supplement (PMC5017727; doi:10.1371/journal.pgen.1006238), 2016-09-09

# 5S rRNA 03

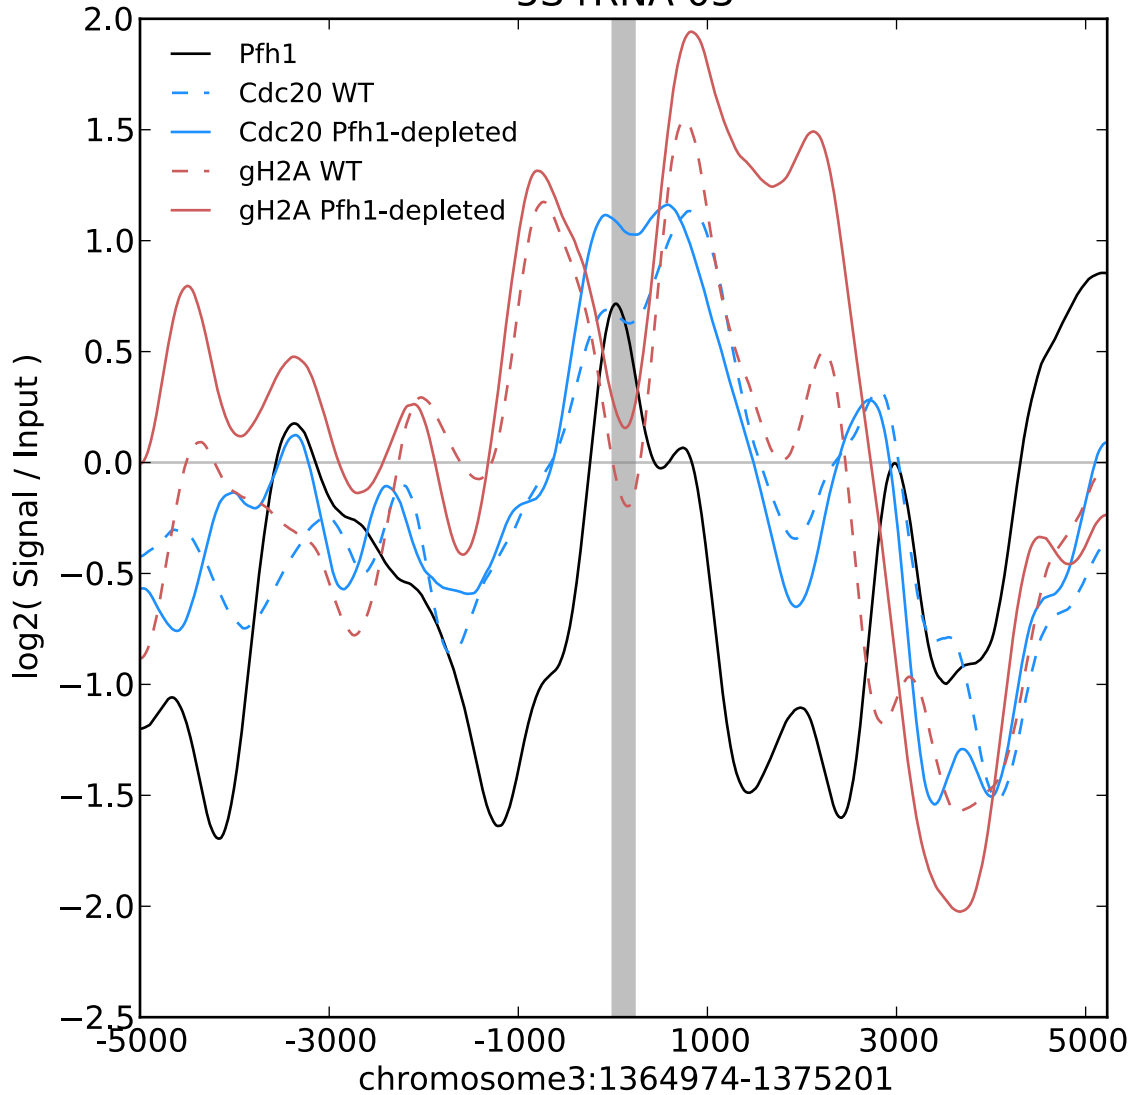

# 5S rRNA 04

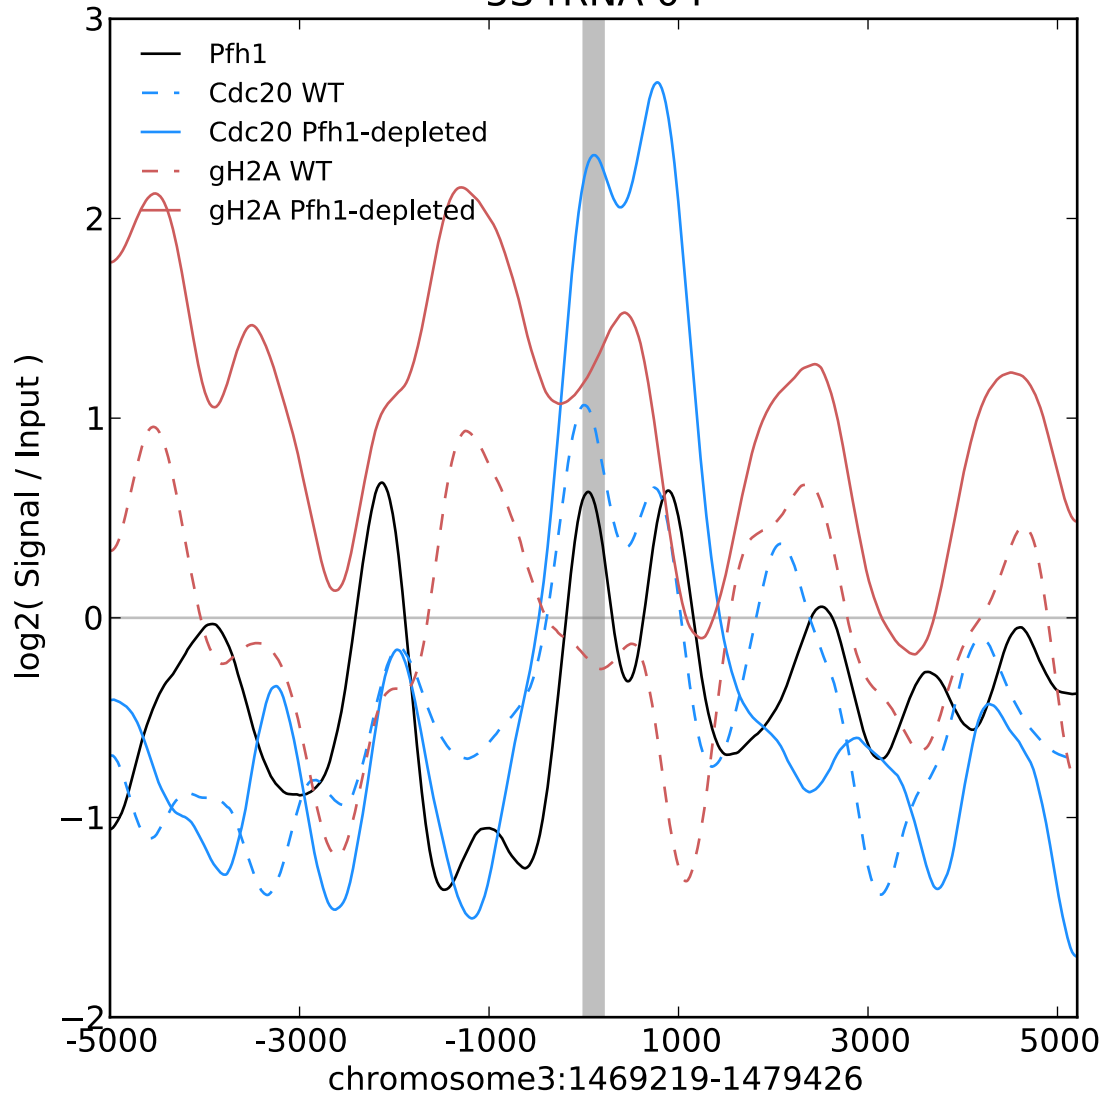

# 5S rRNA 05

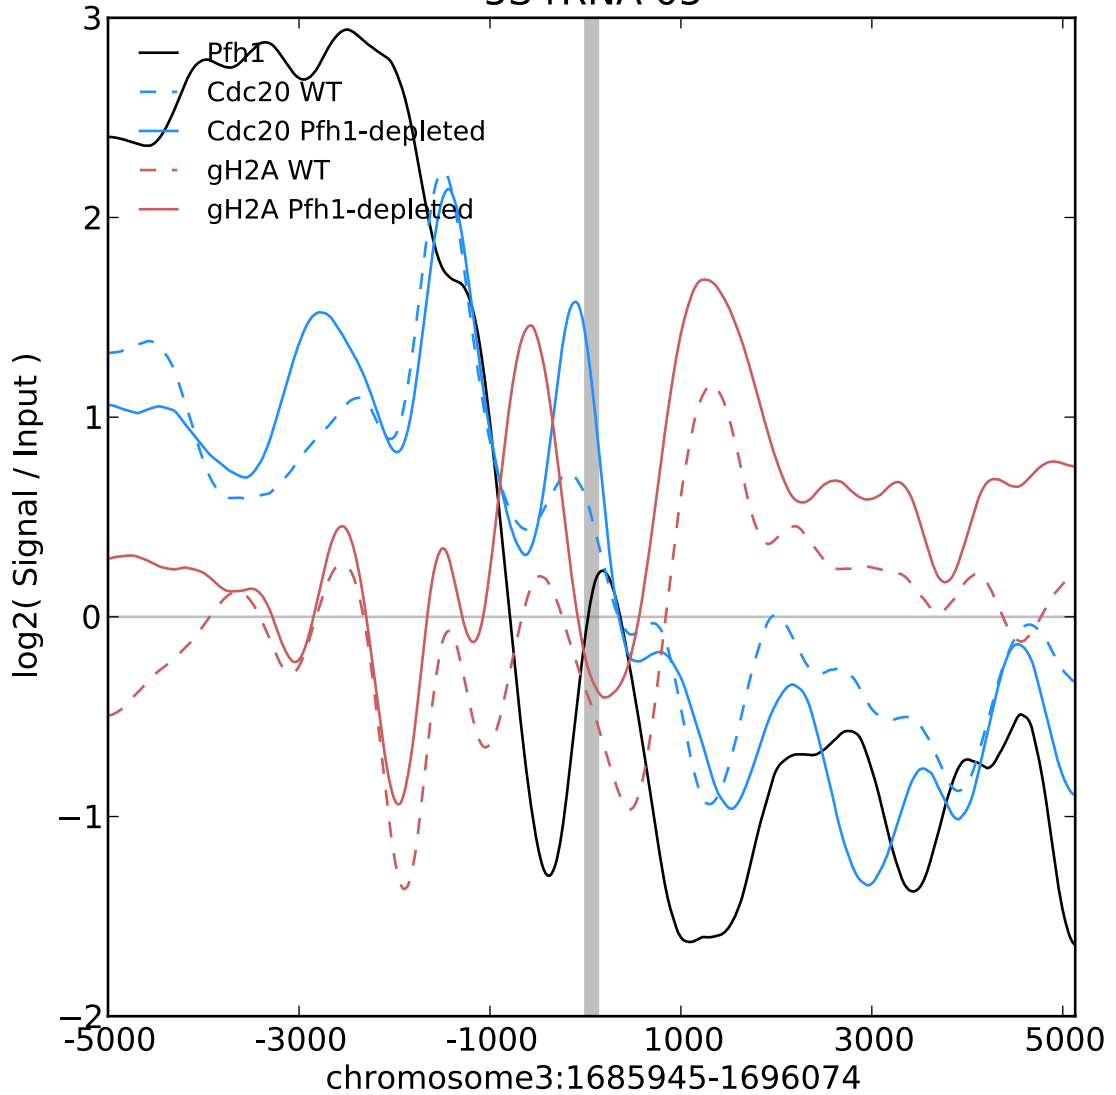

# 5S rRNA 06

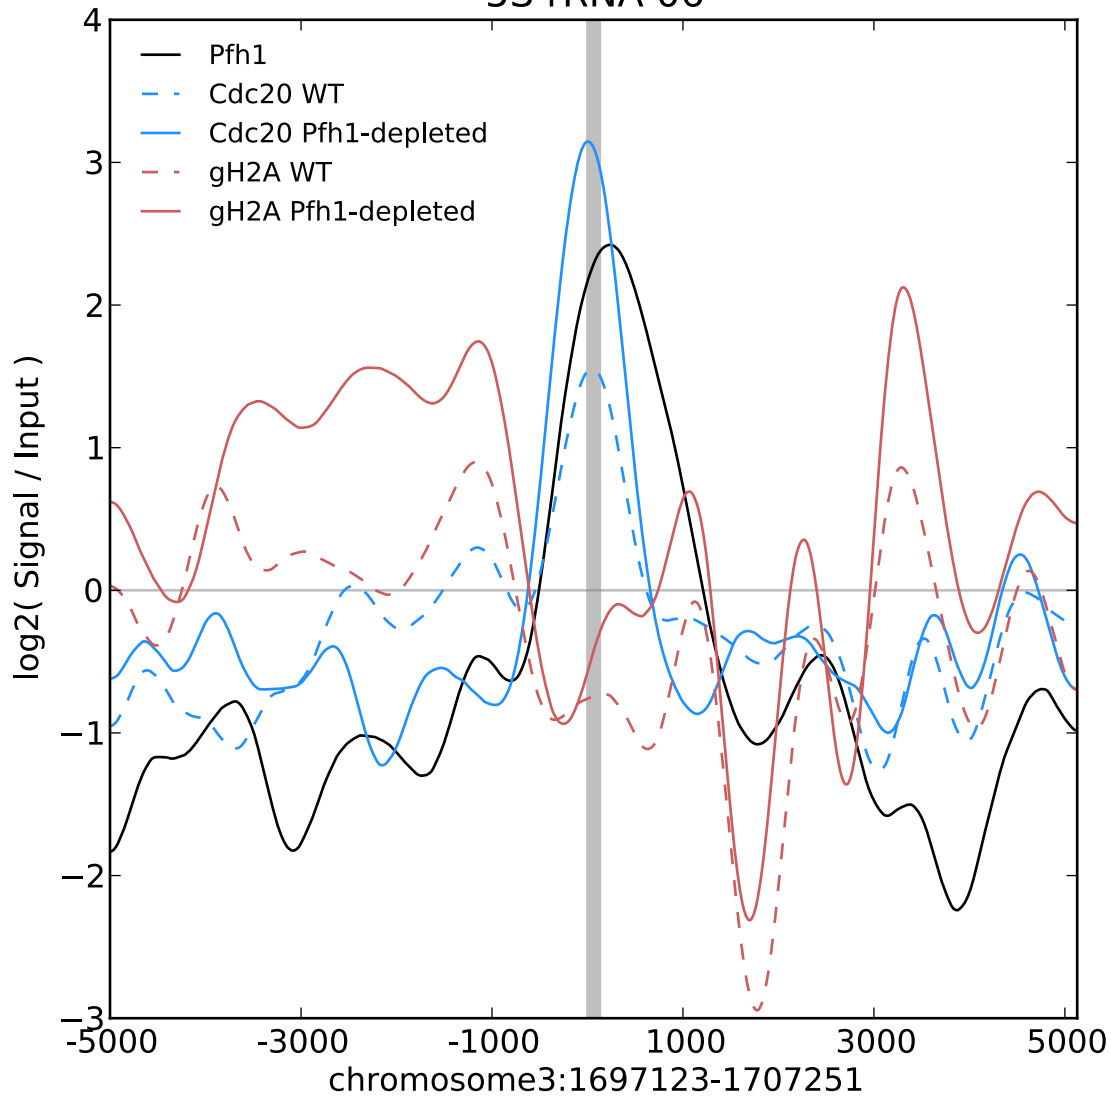

# 5S rRNA 07

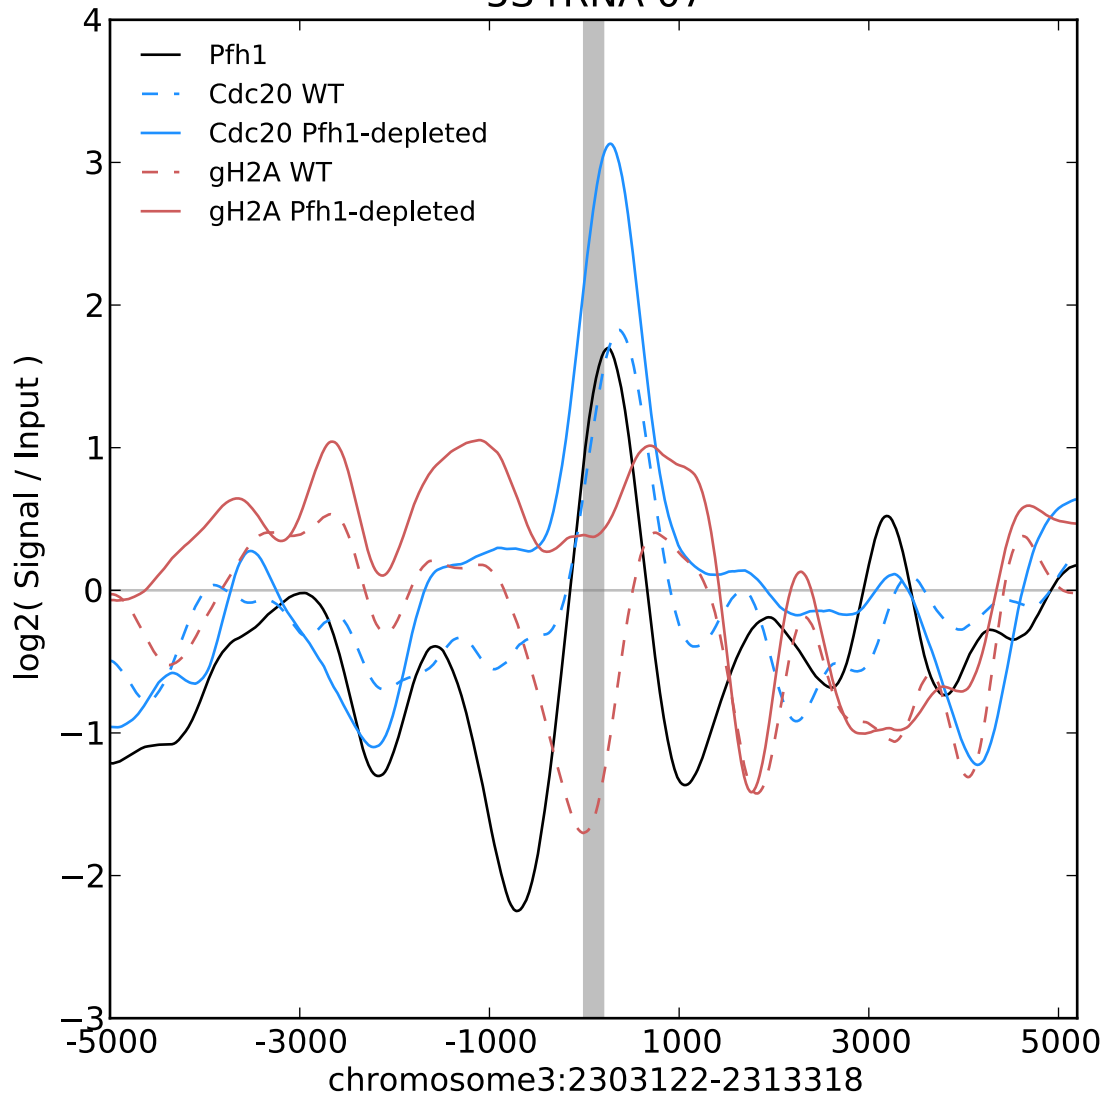

# 5S rRNA 10

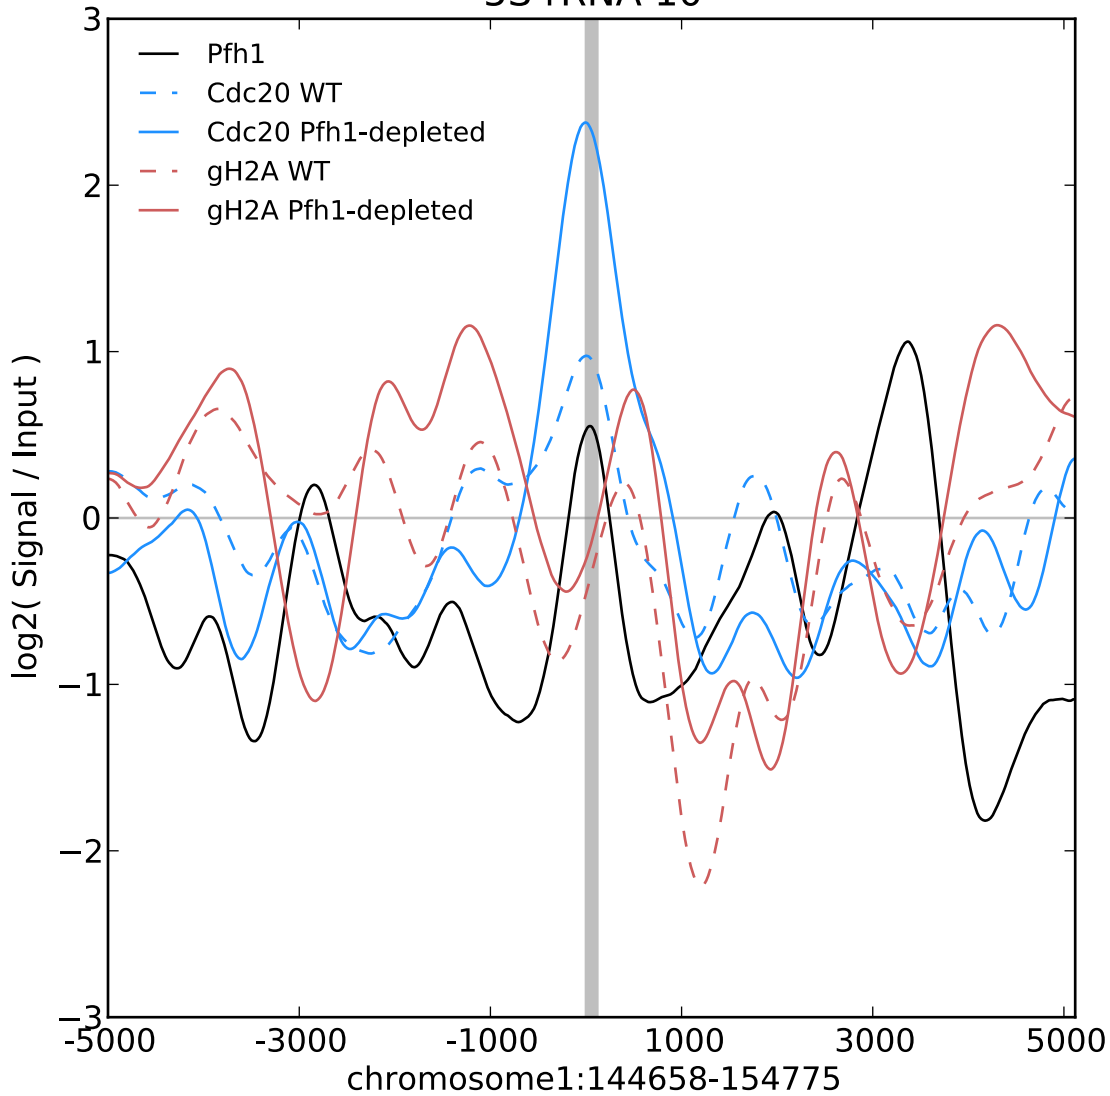

# 5S rRNA 11

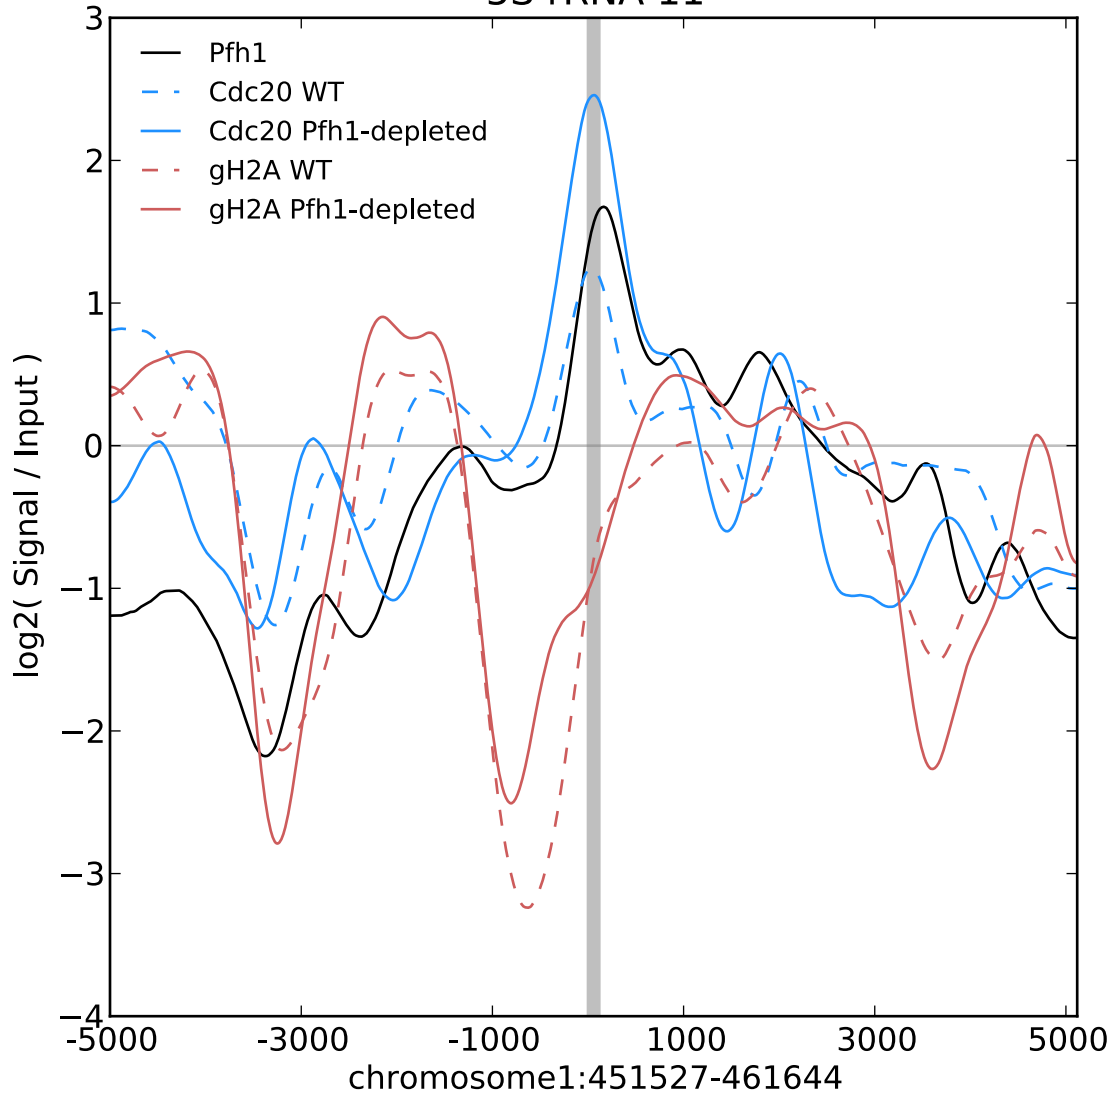

# 5S rRNA 12

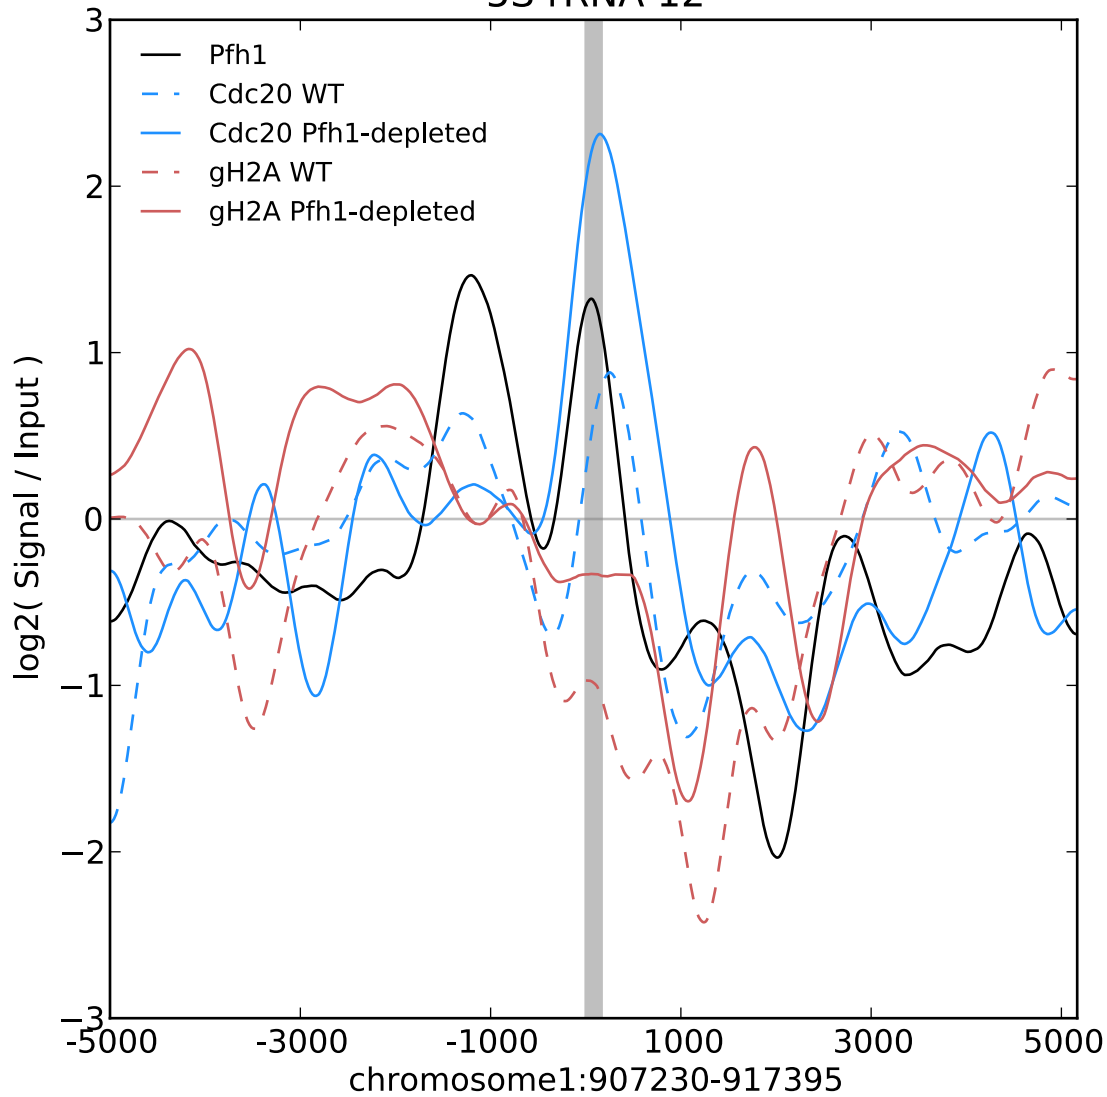



# 5S rRNA 13

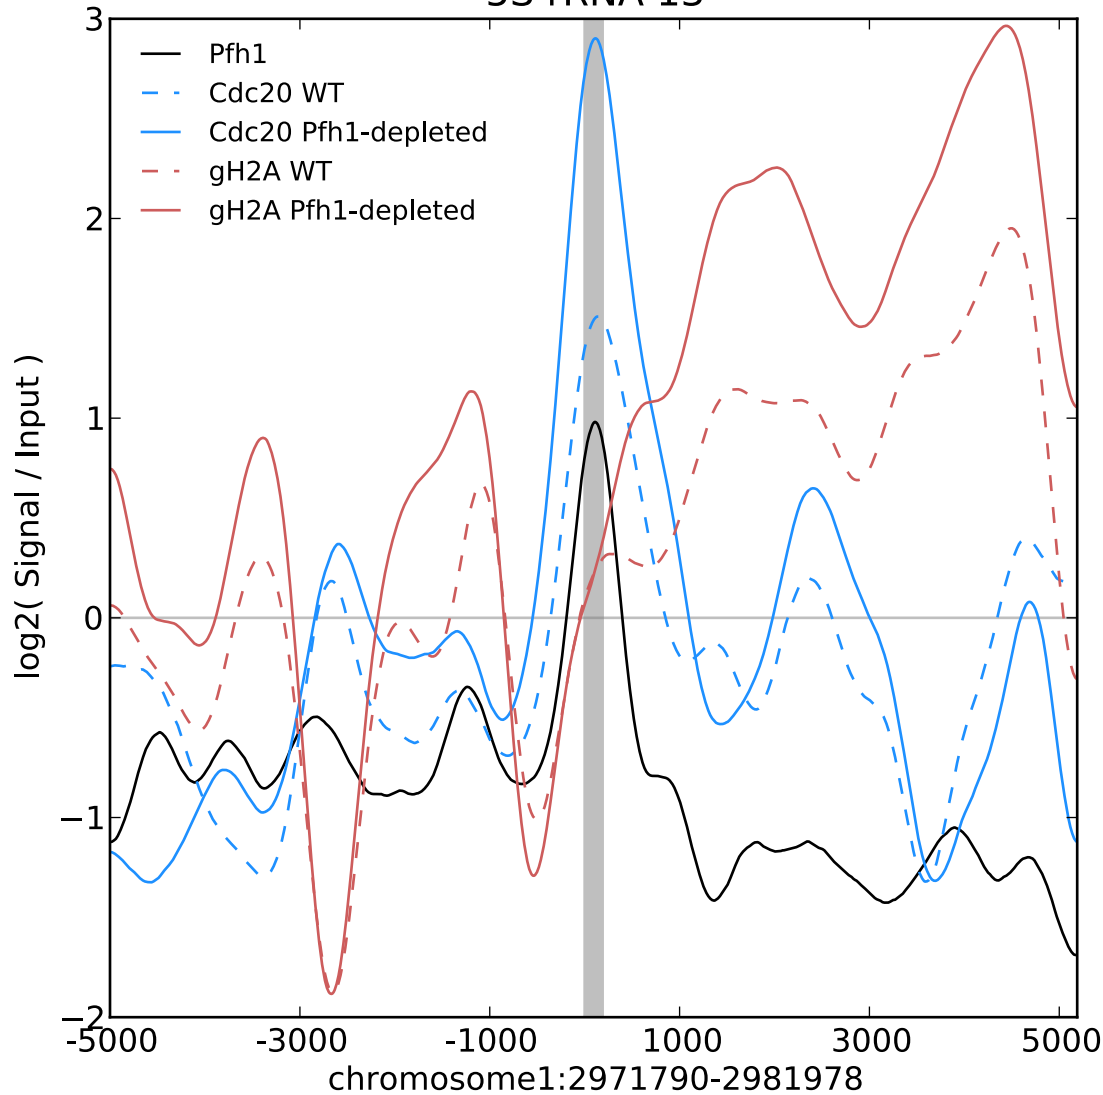

# 5S rRNA 14

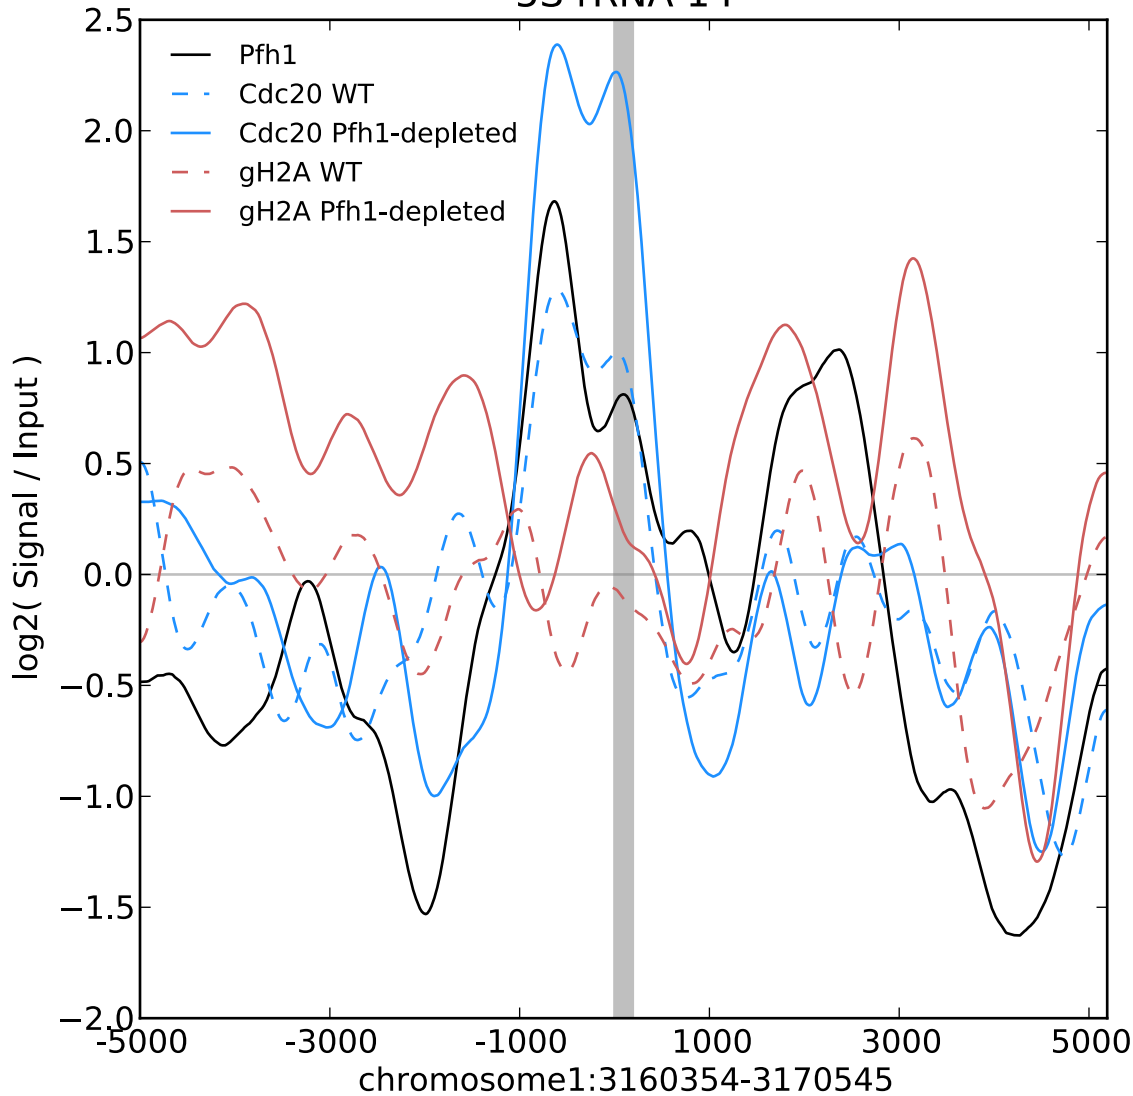

# 5S rRNA 15

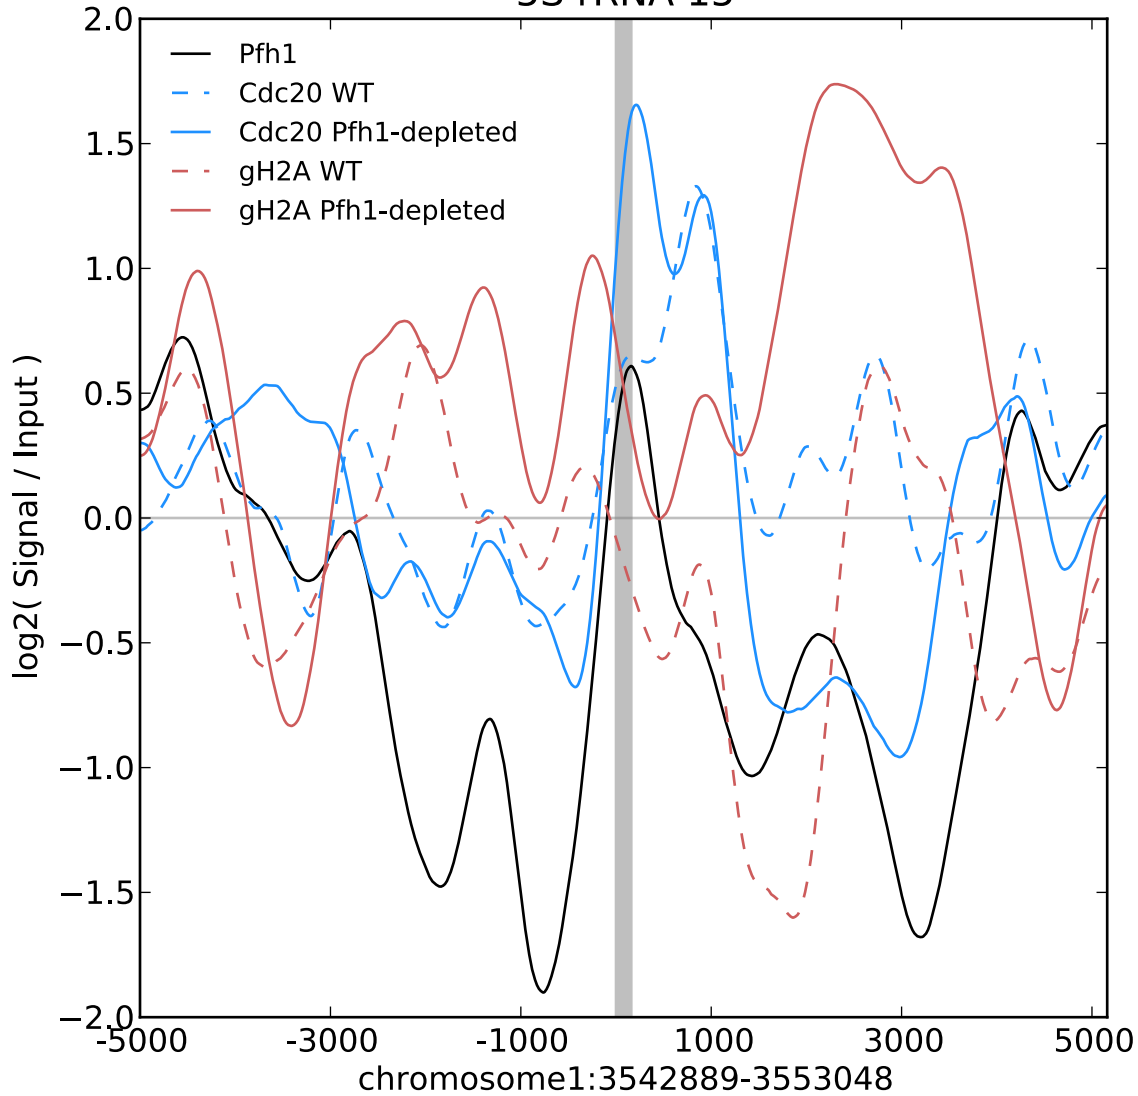

# 5S rRNA 16

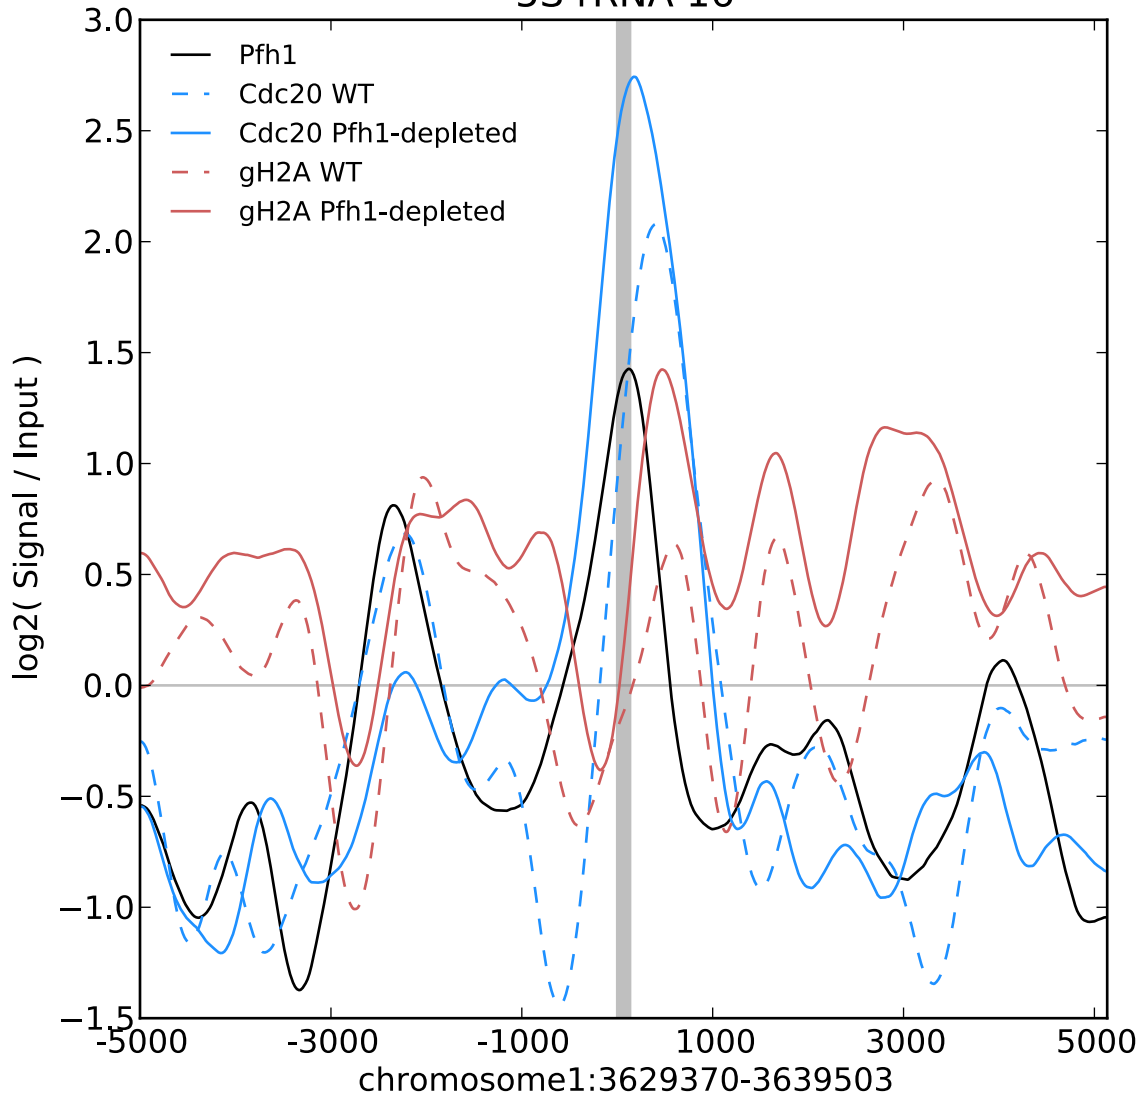

# 5S rRNA 17

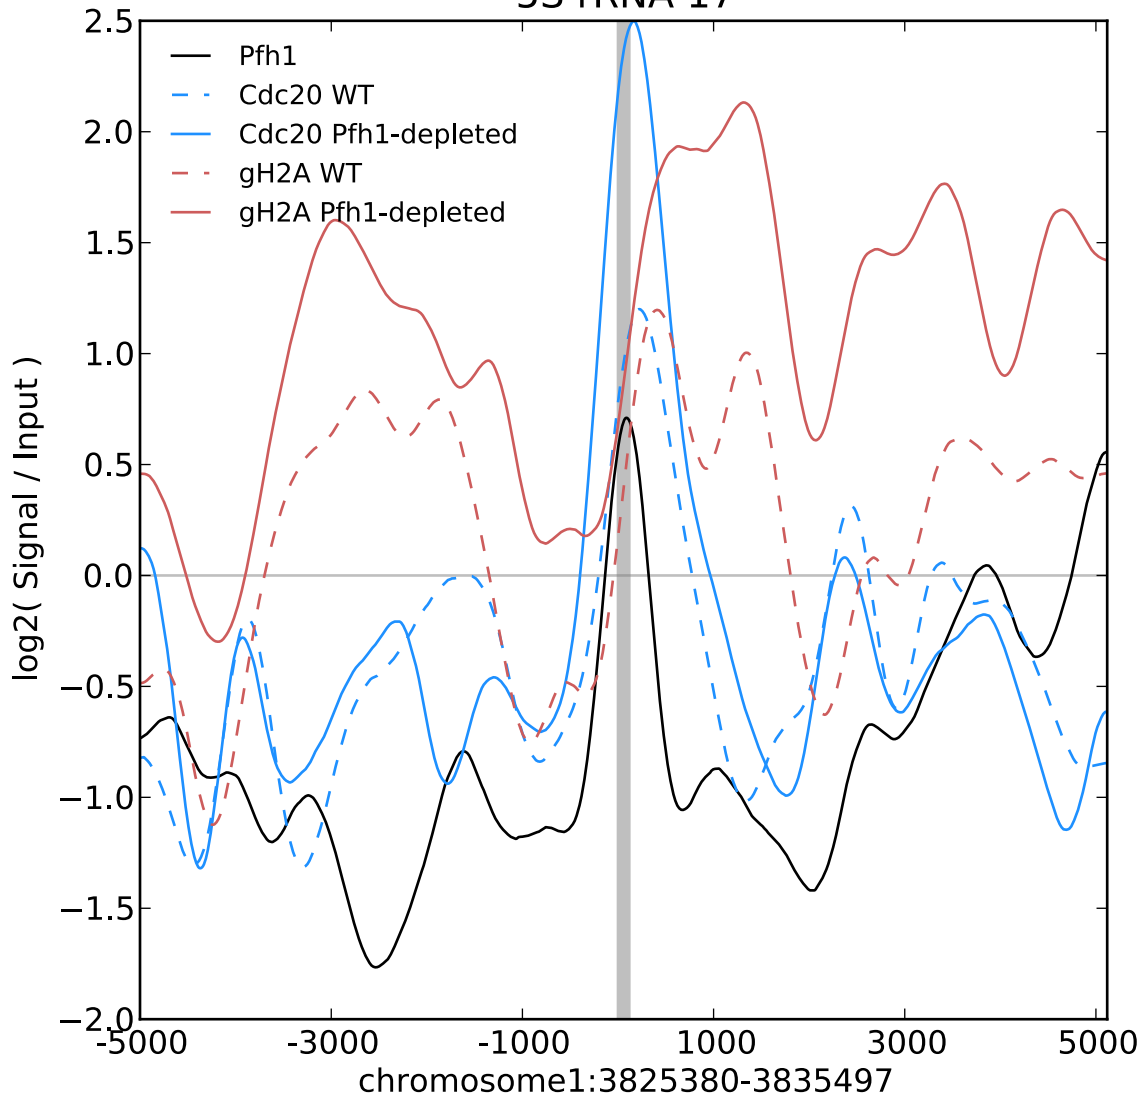

# 5S rRNA 18

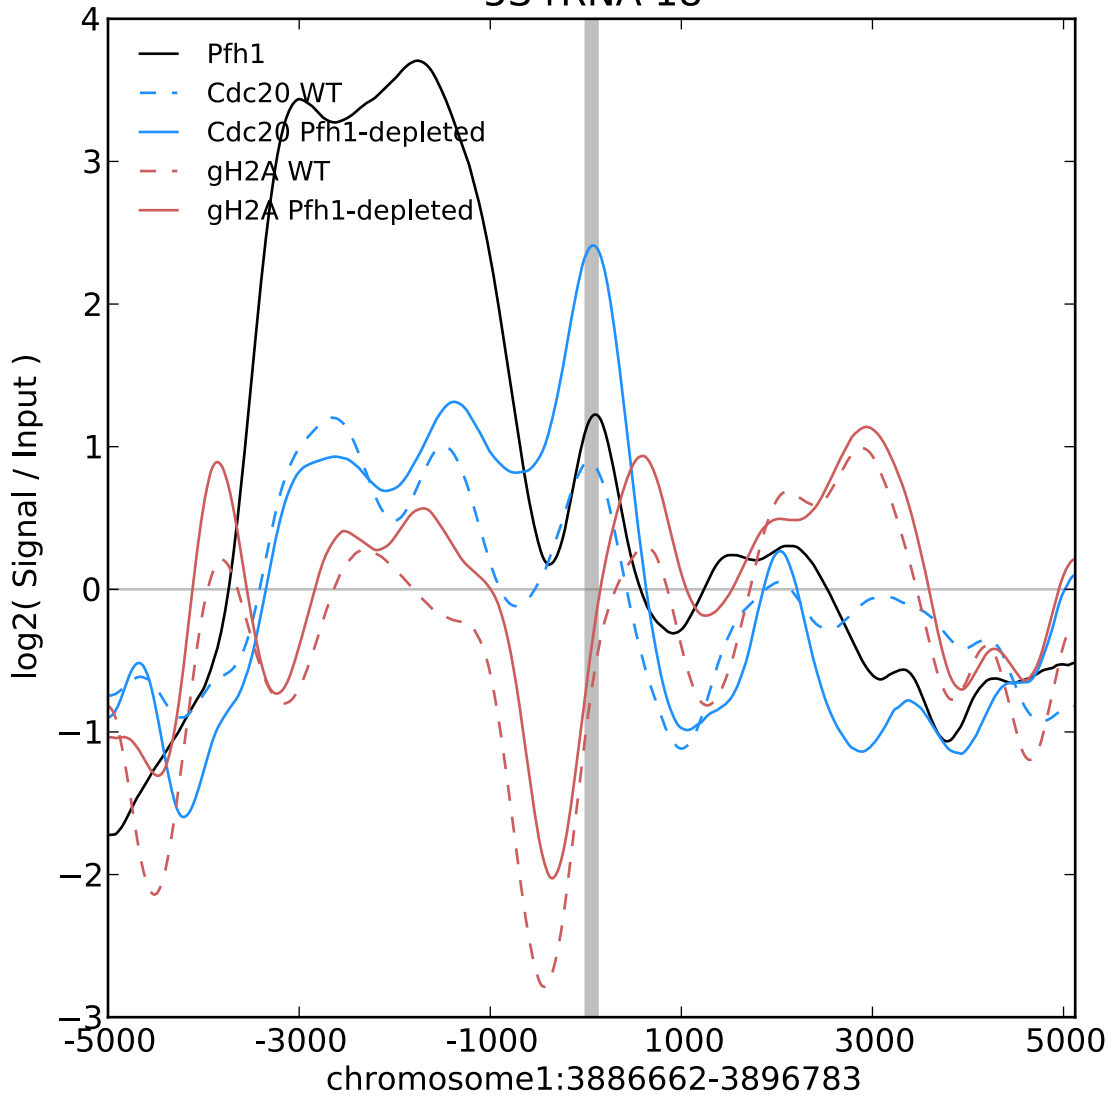

# 5S rRNA 19

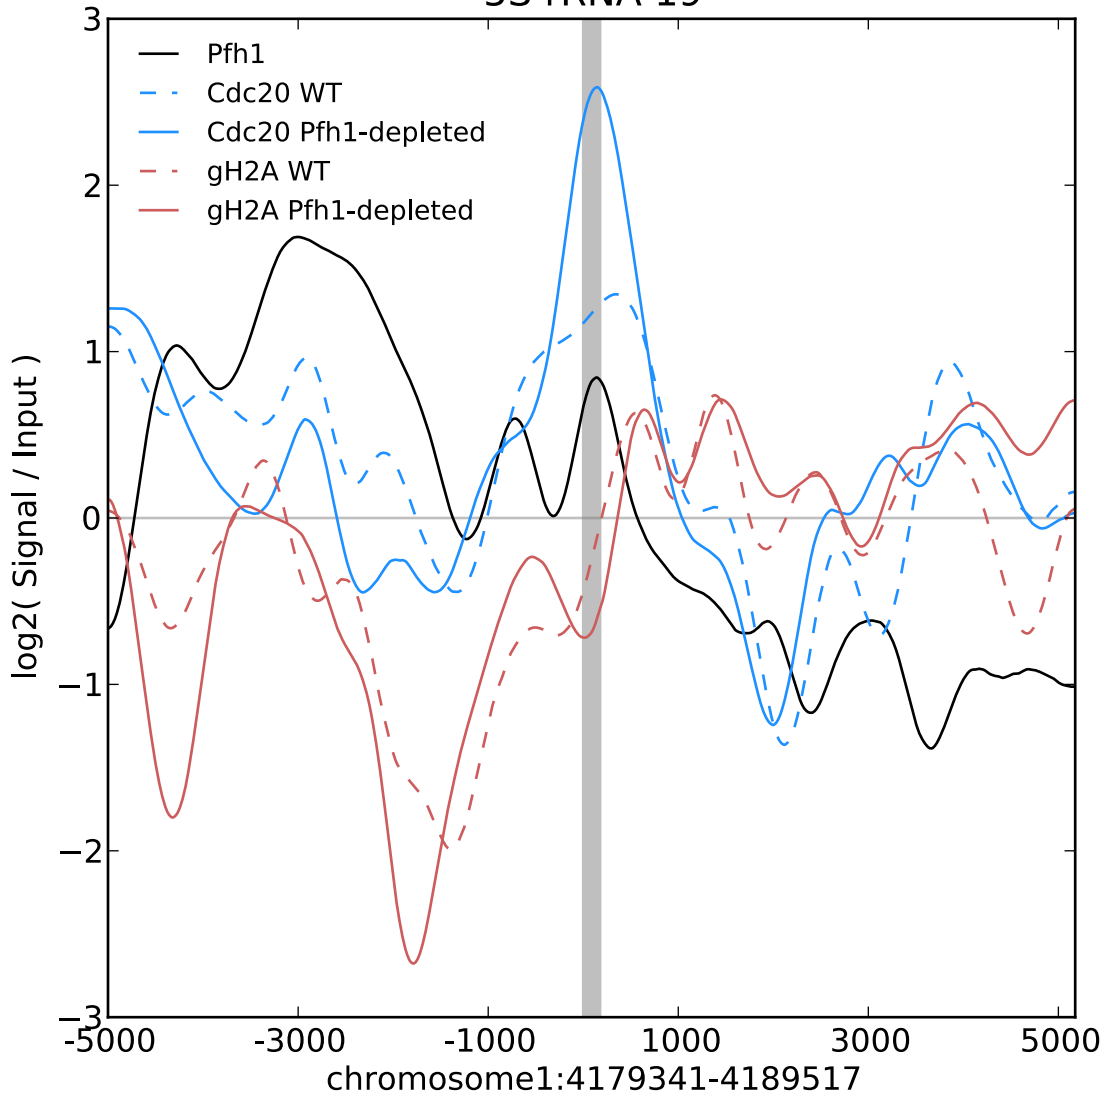

## 5S rRNA 20

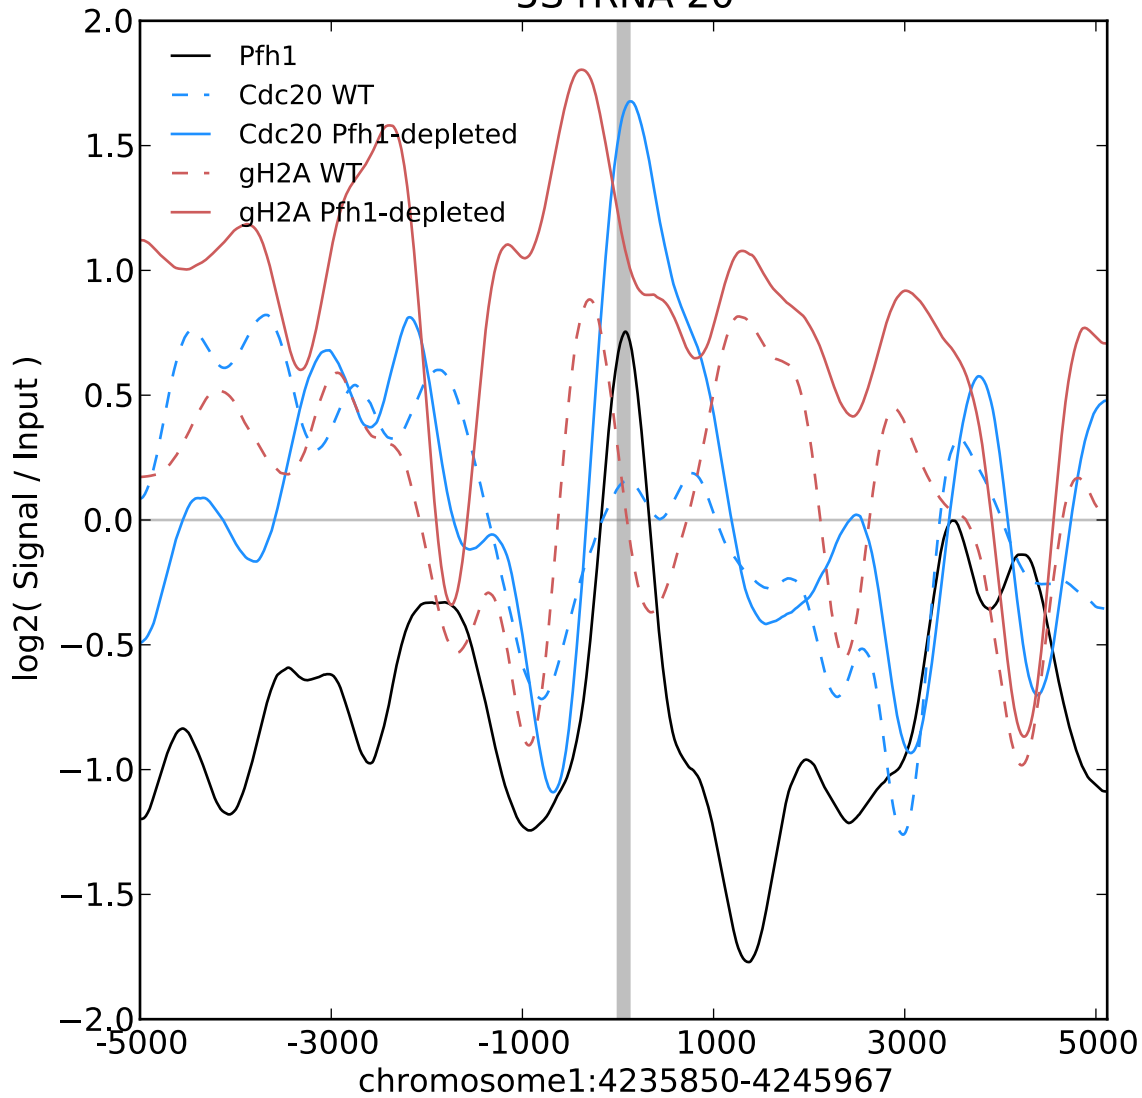





# 5S rRNA 26

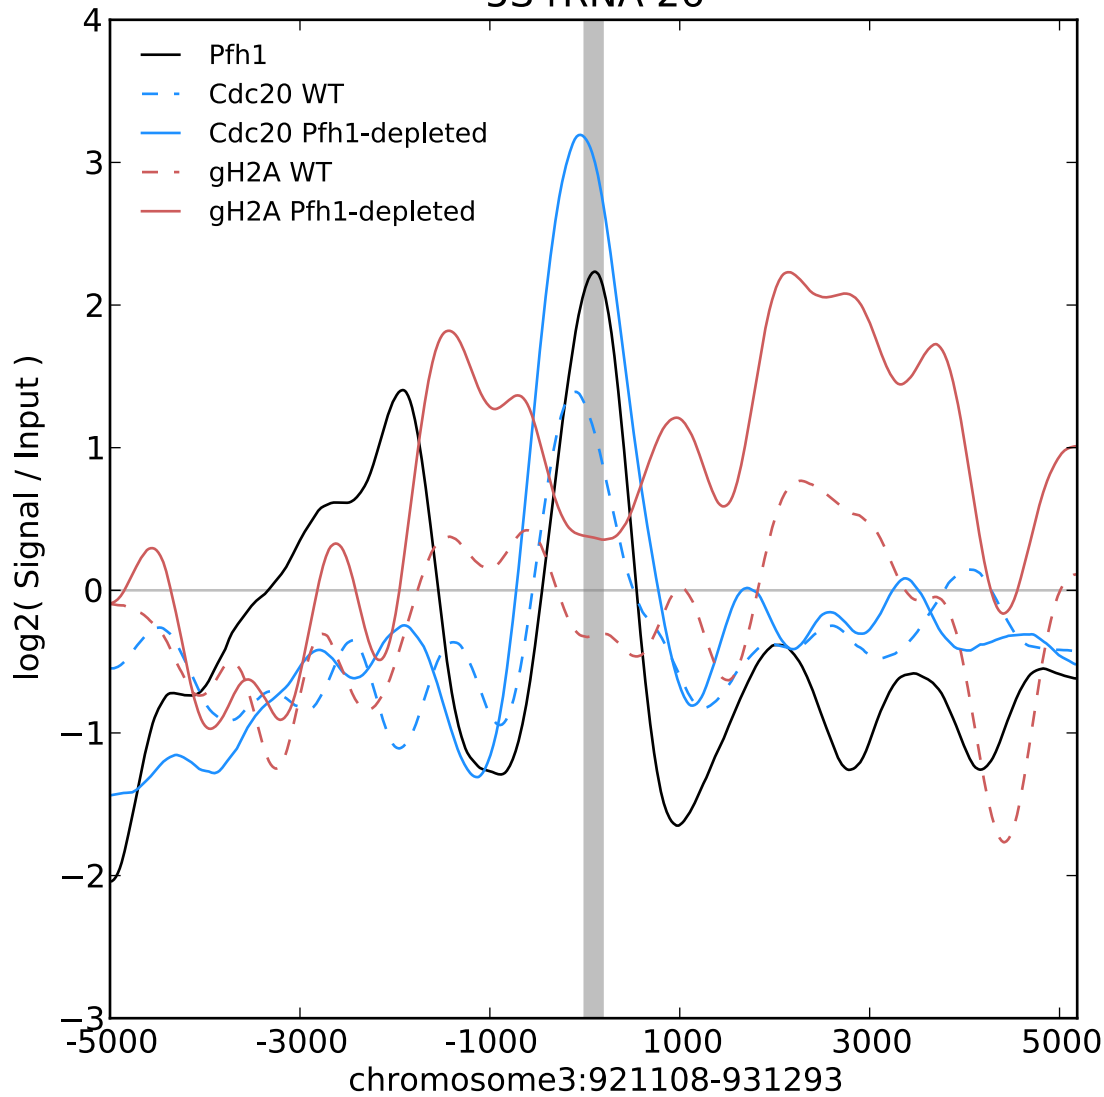

# 5S rRNA 27

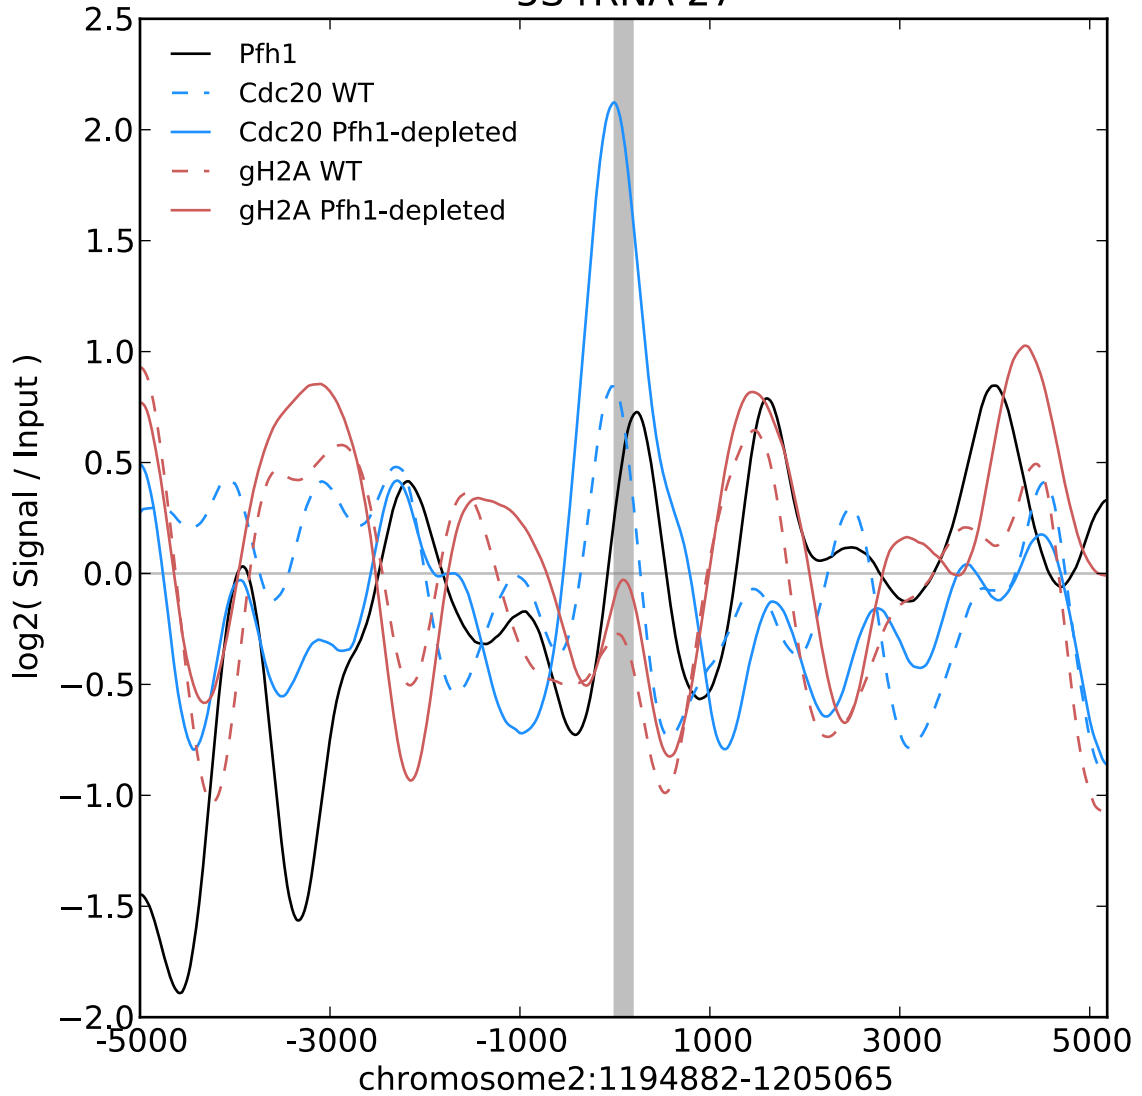

# 5S rRNA 28

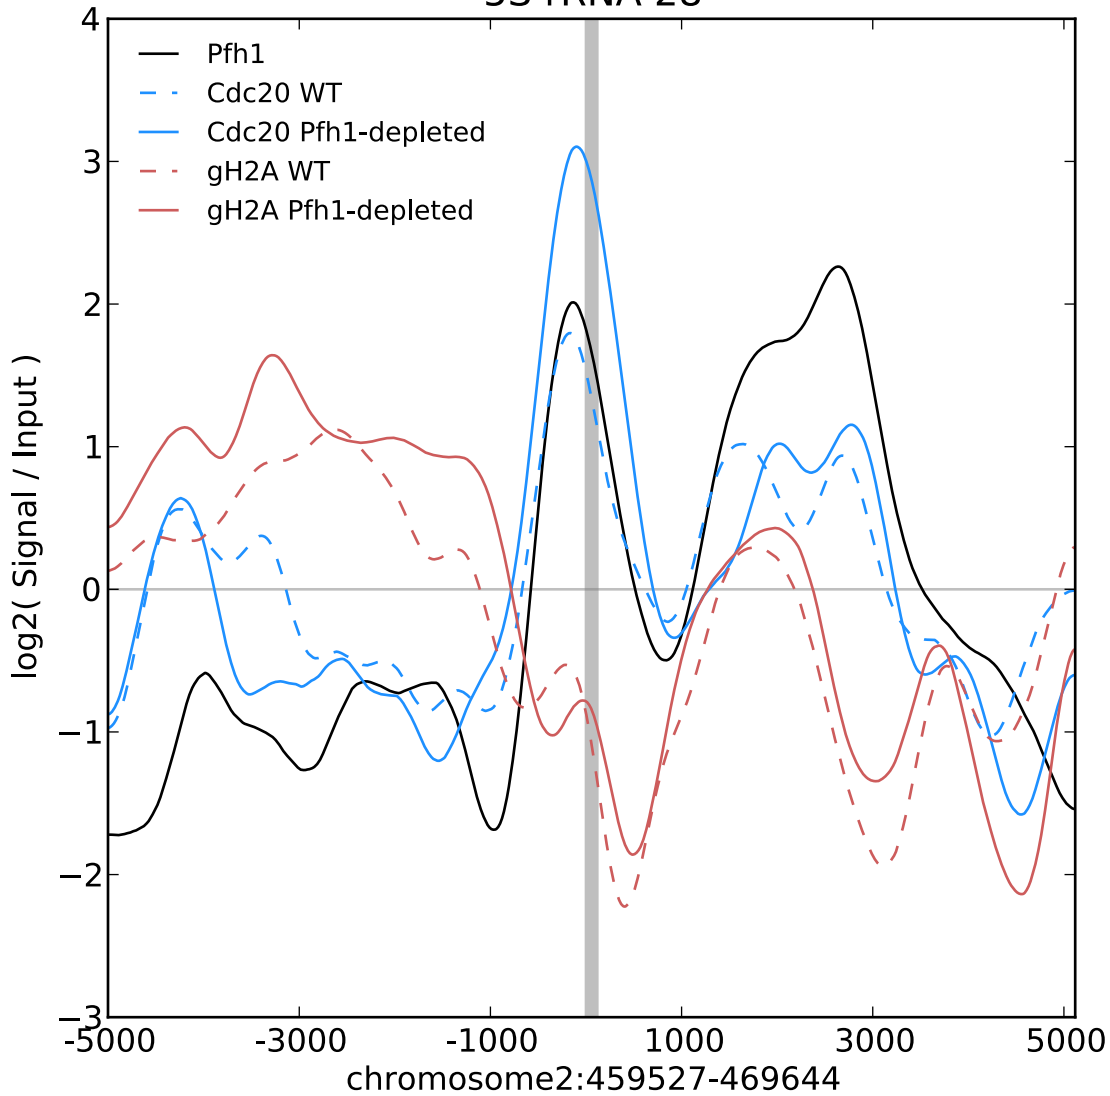

# 5S rRNA 29

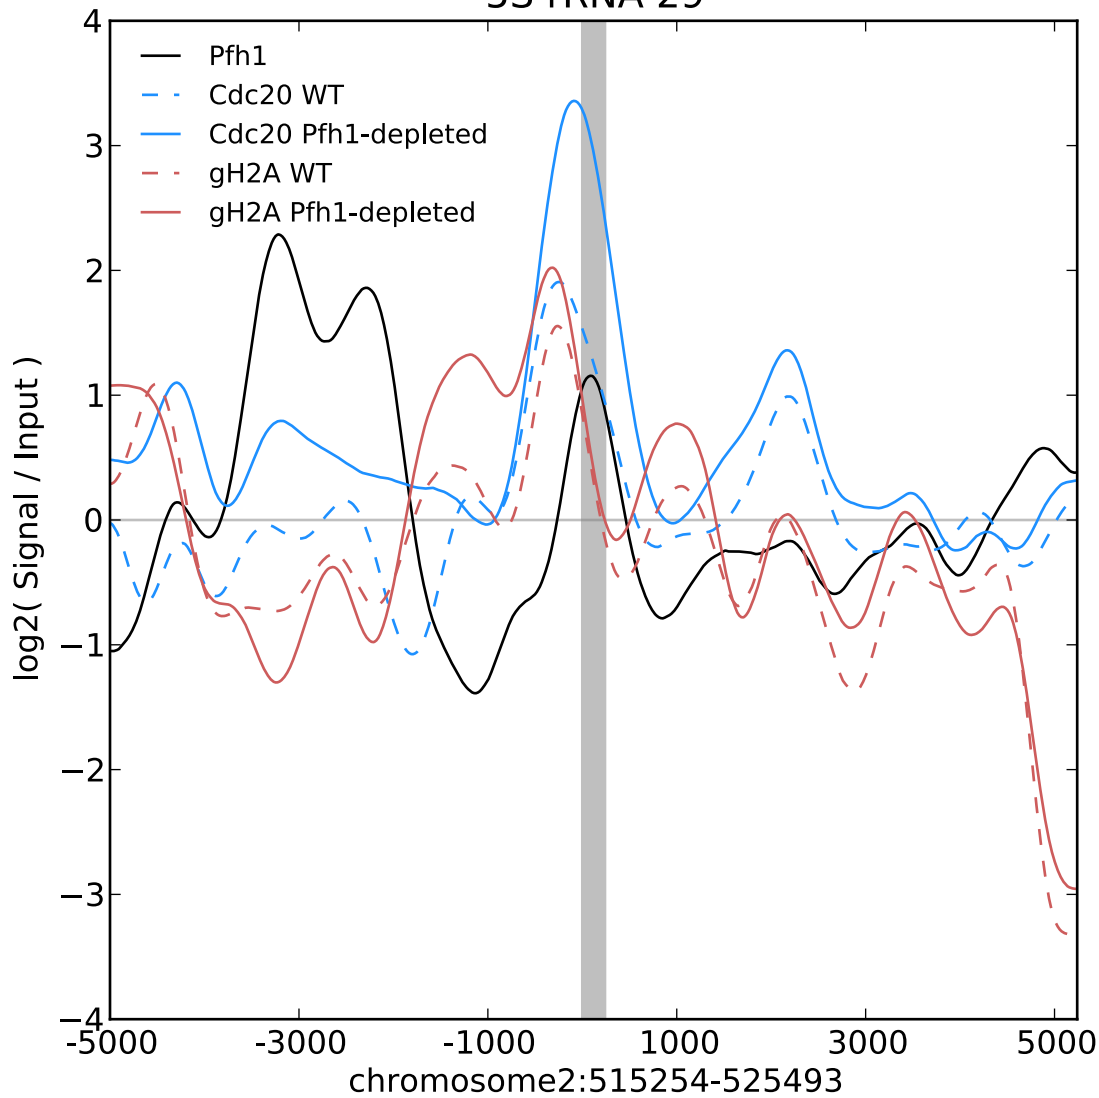

# 5S rRNA 30

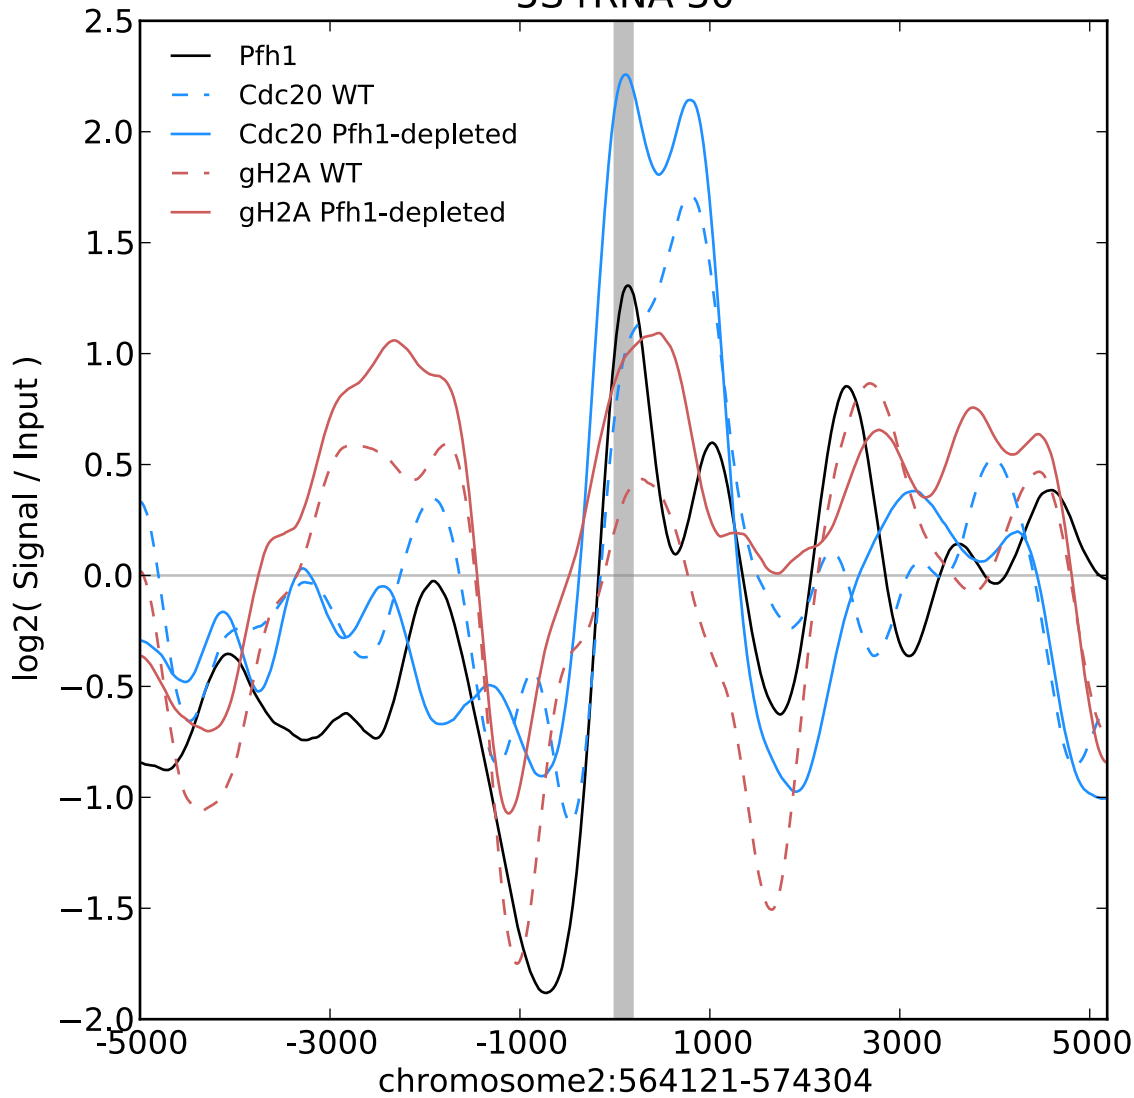

# 5S rRNA 31

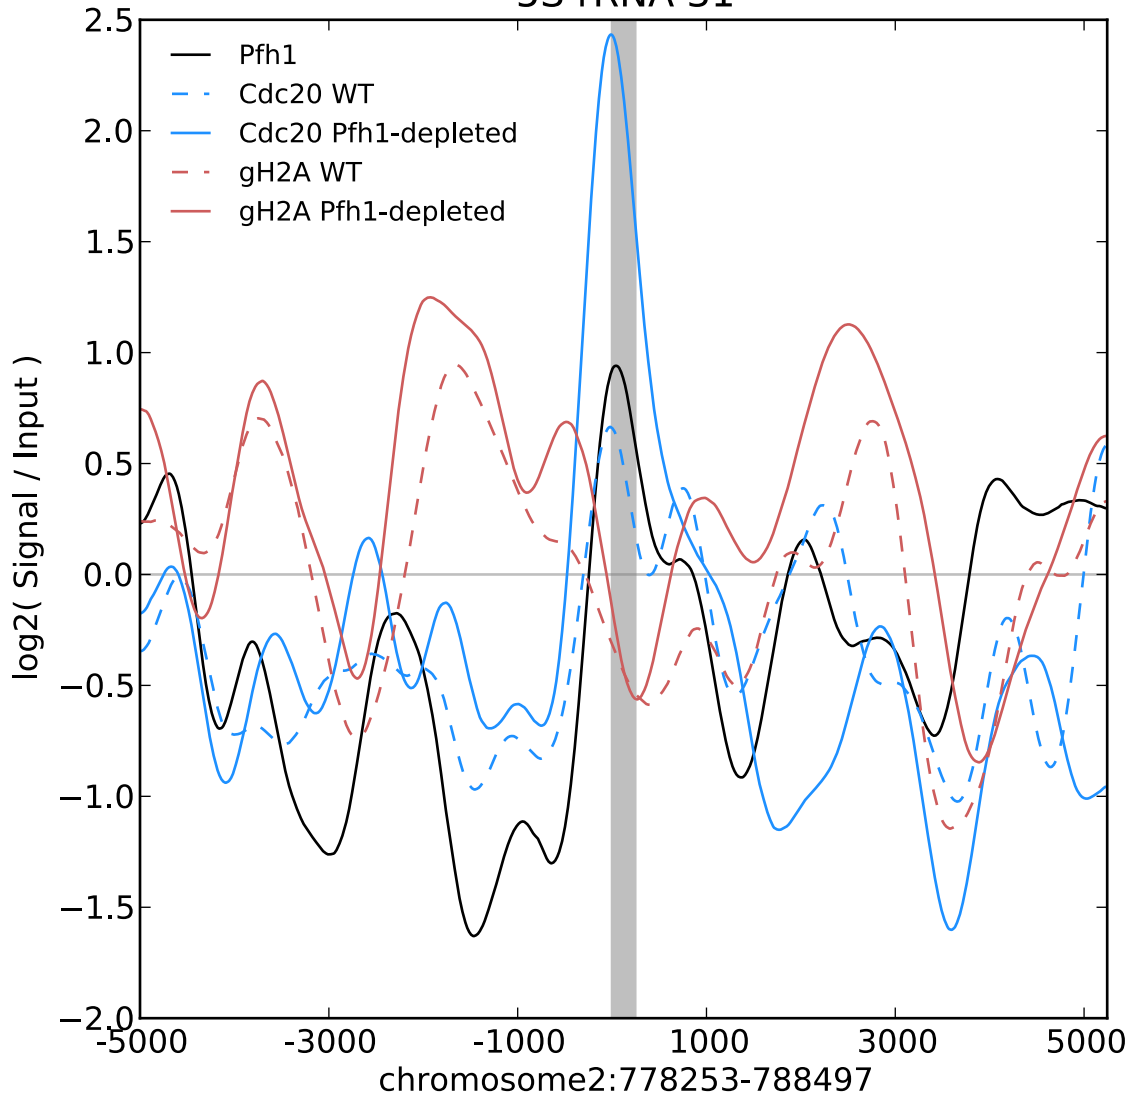

# 5S rRNA 32

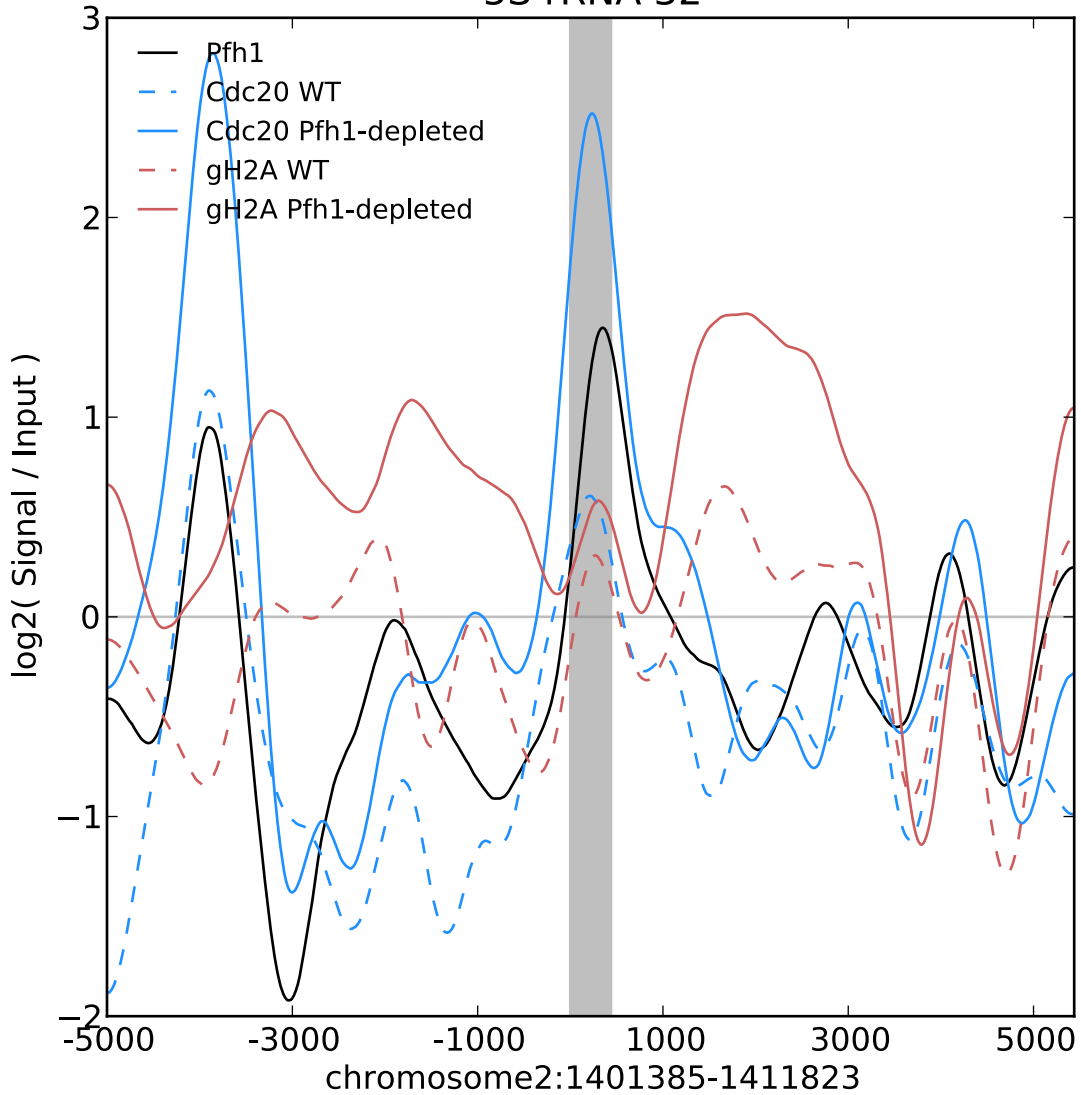



# 5S rRNA 33

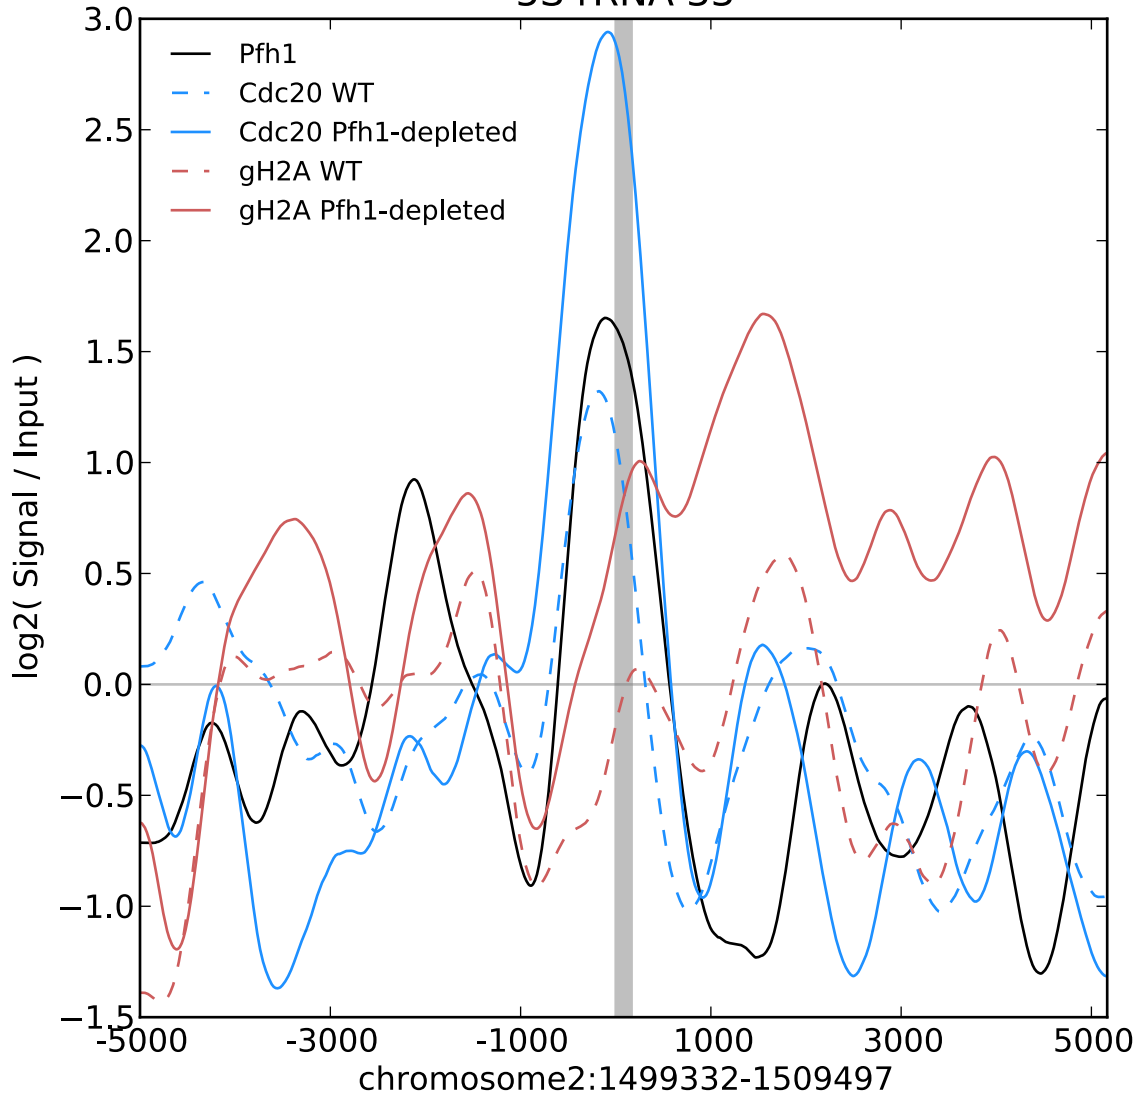

# 5S rRNA 34

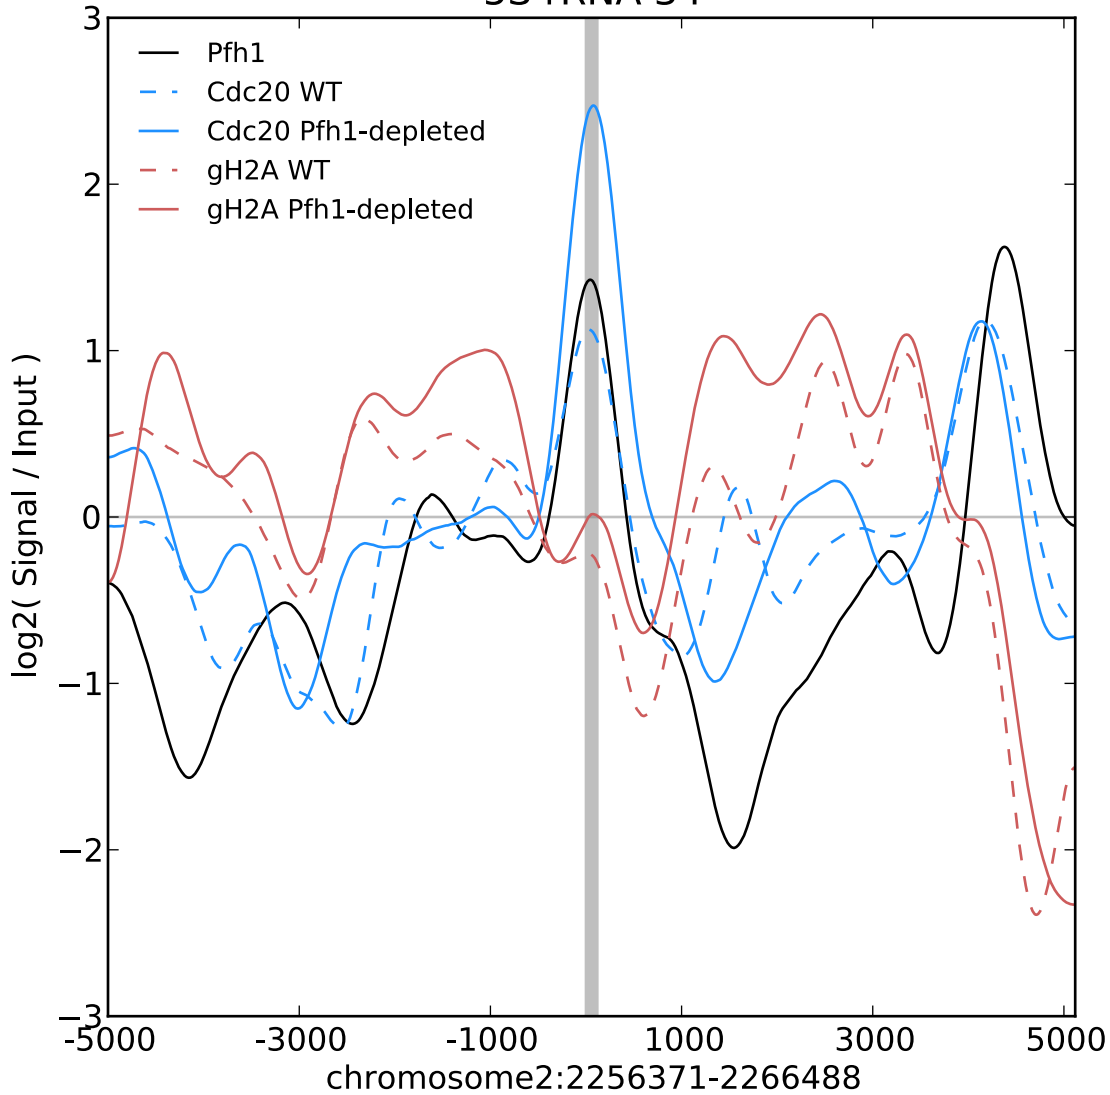

# 5S rRNA 35

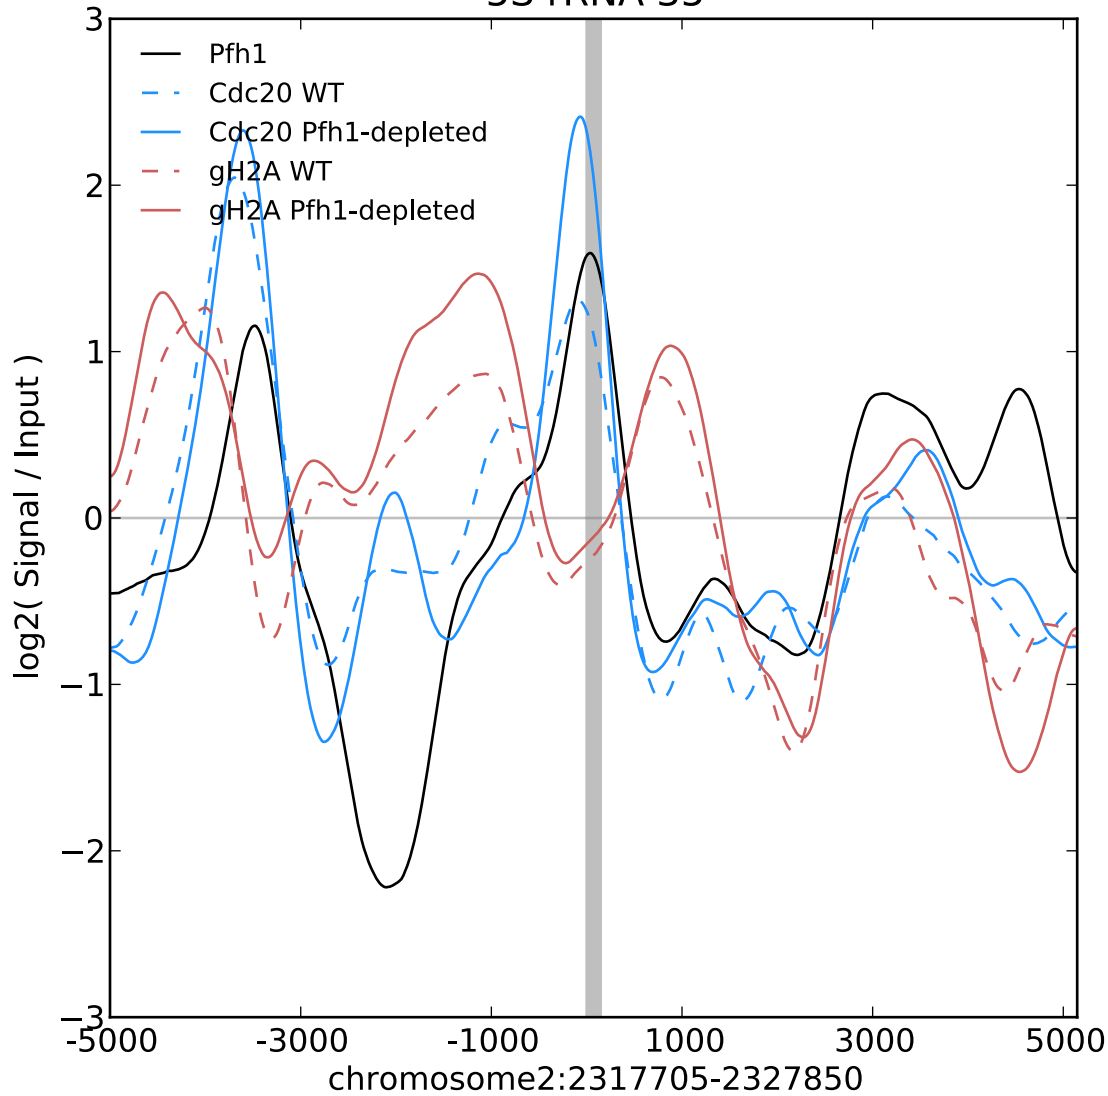

# 5S rRNA 36

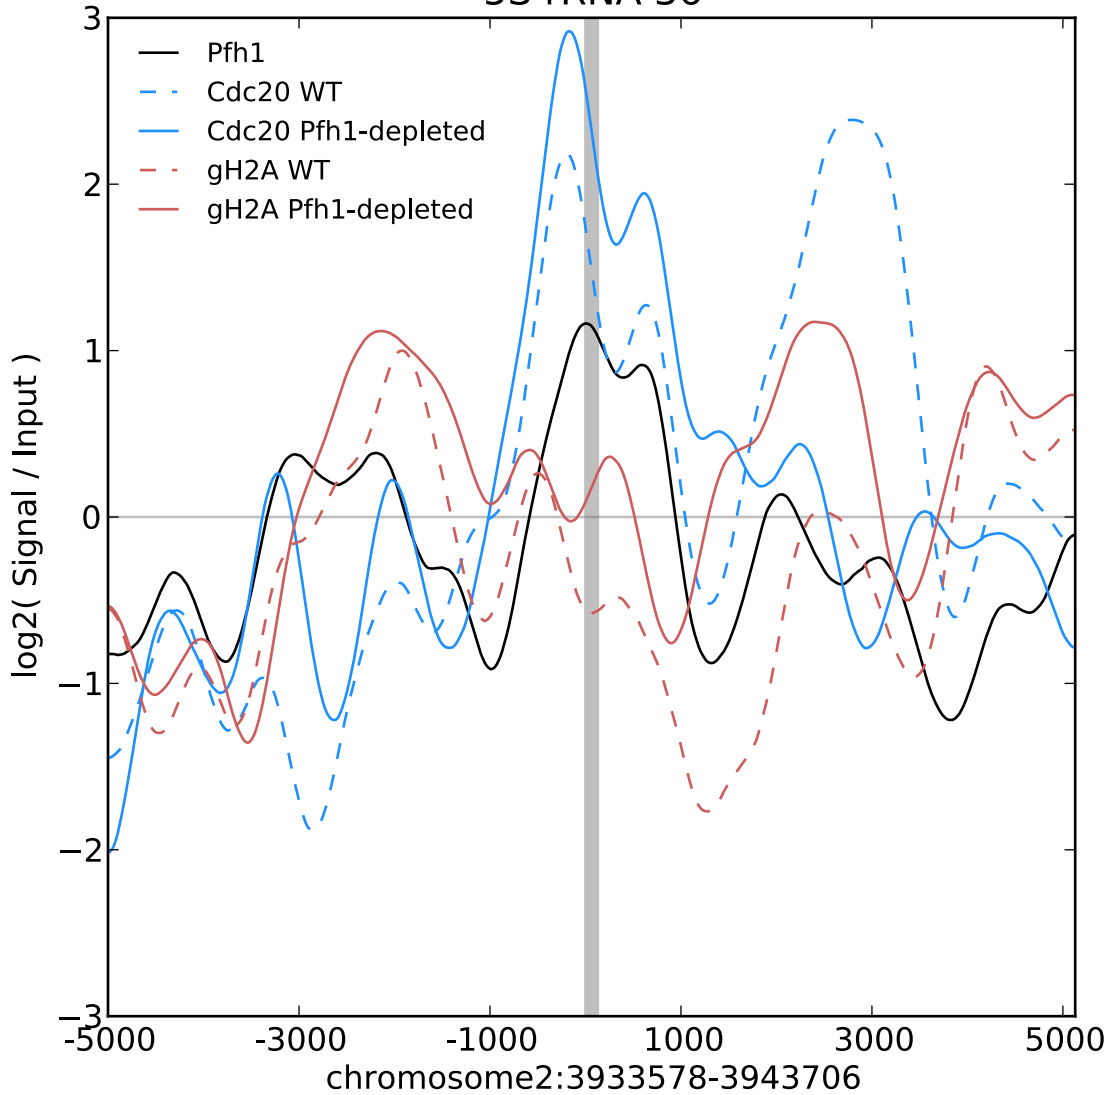

# 5S rRNA 37

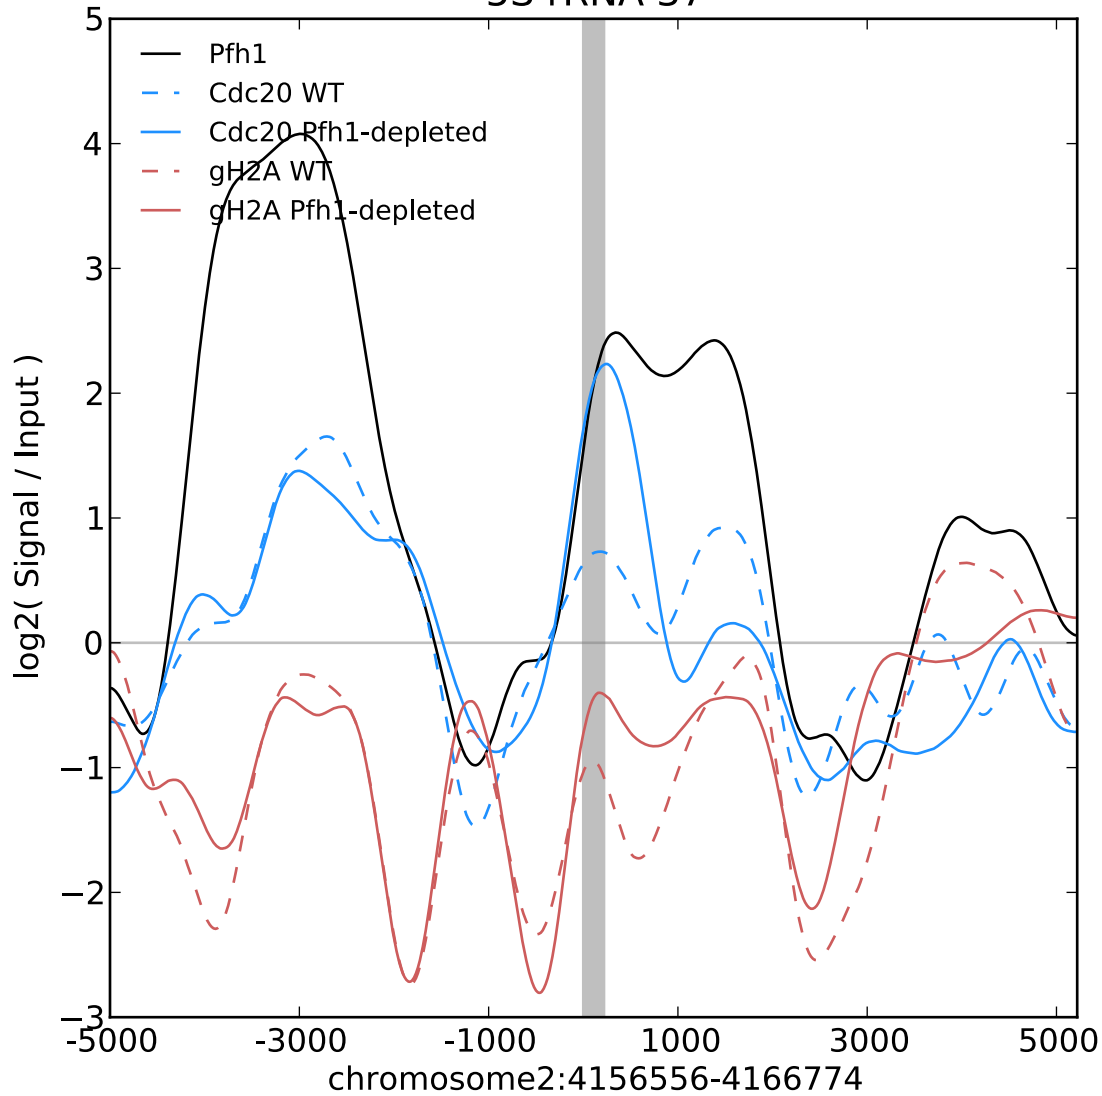

# 5S rRNA 38

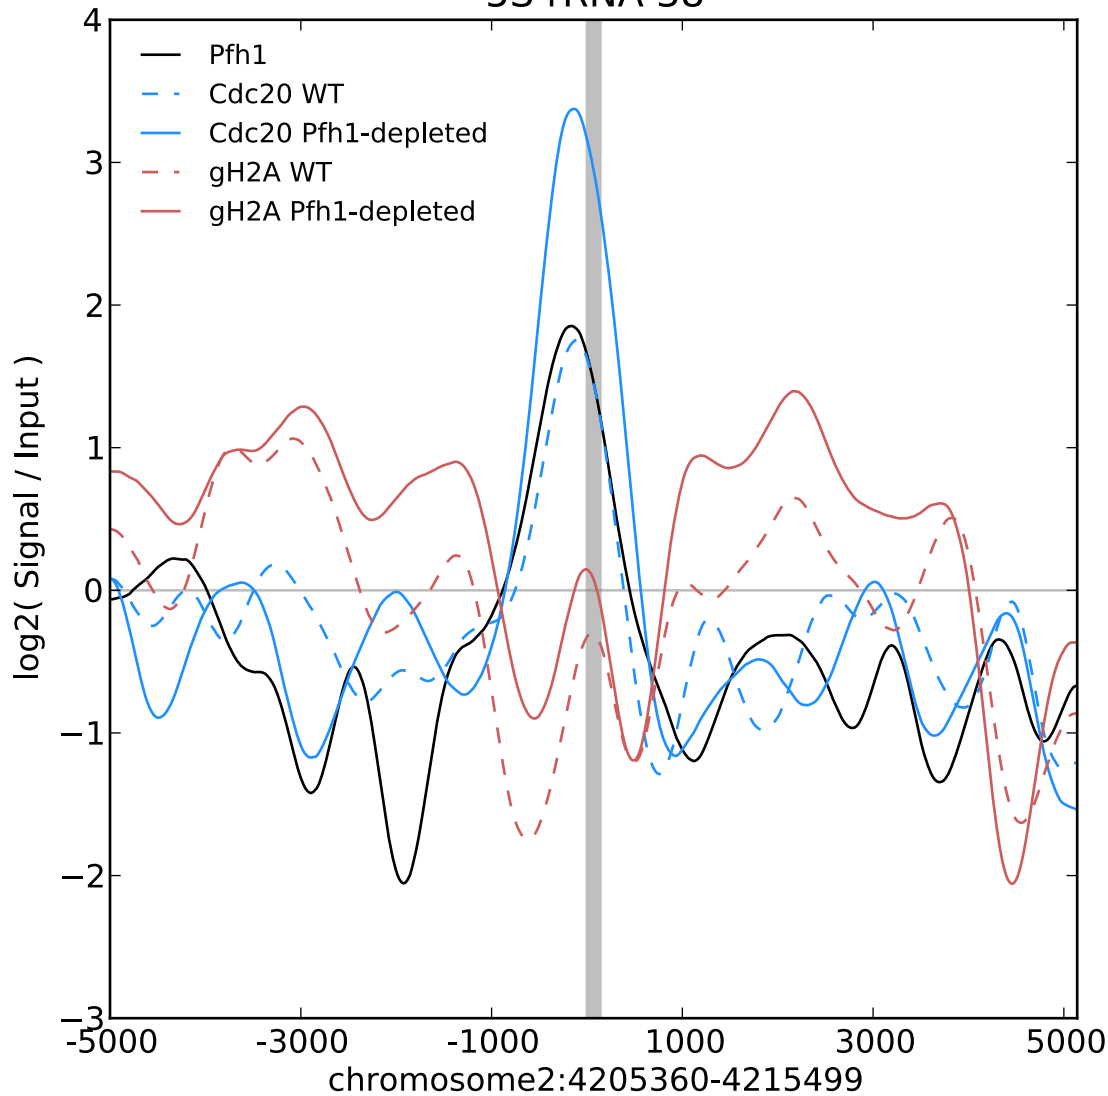

# 5S rRNA 39

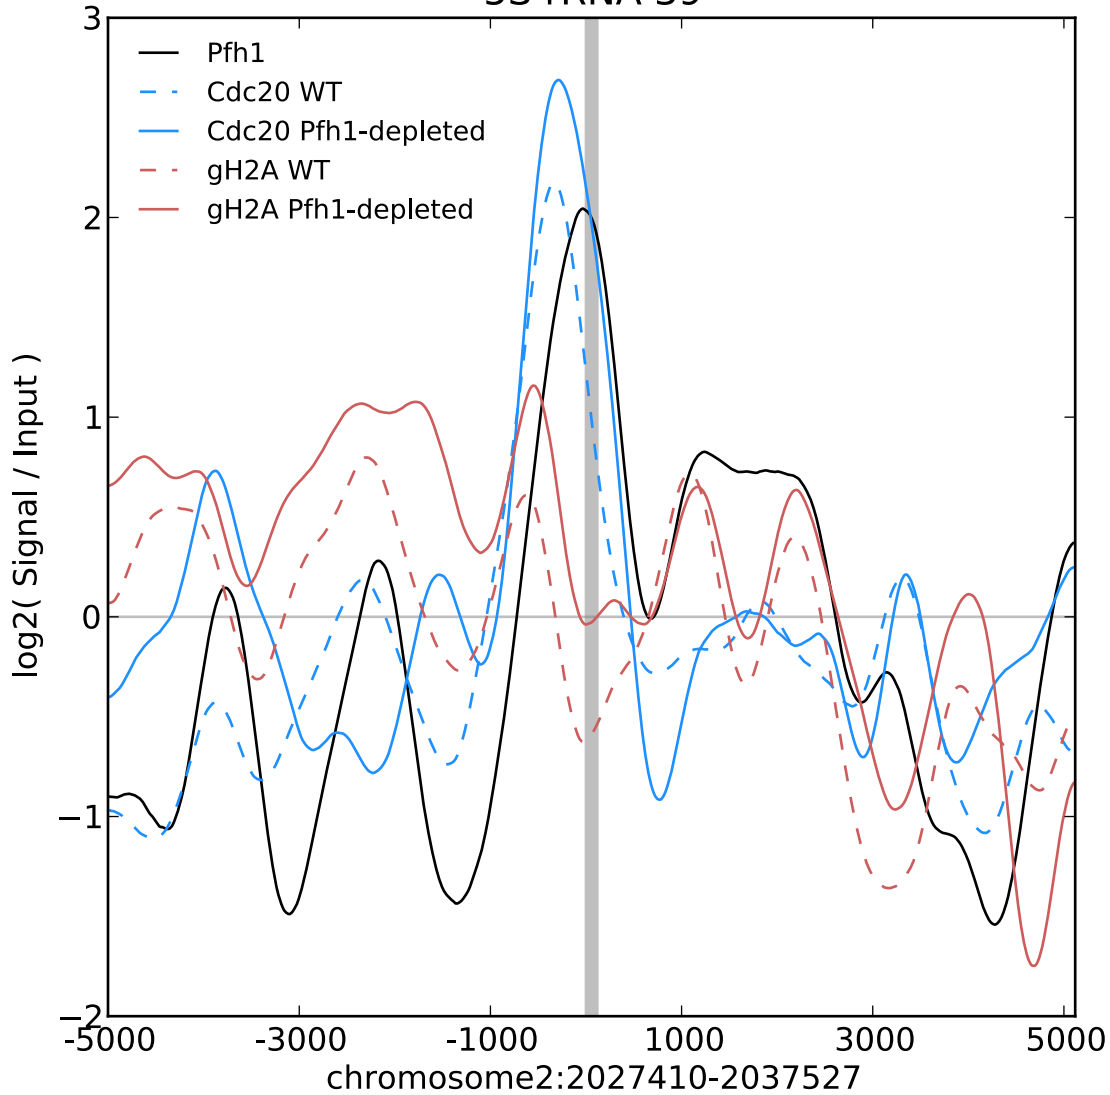

# 5S rRNA 40

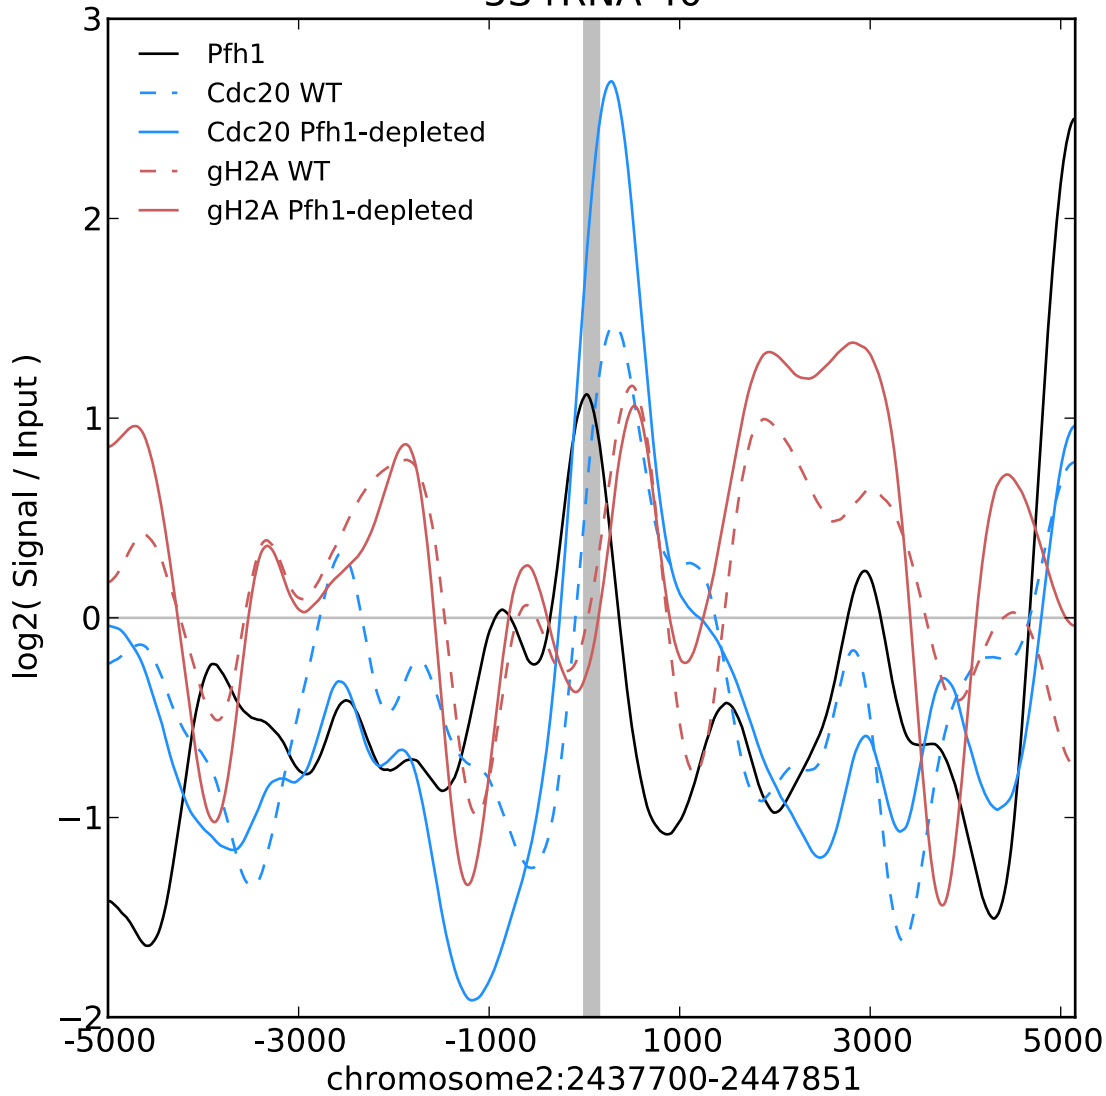



# 5S rRNA 41

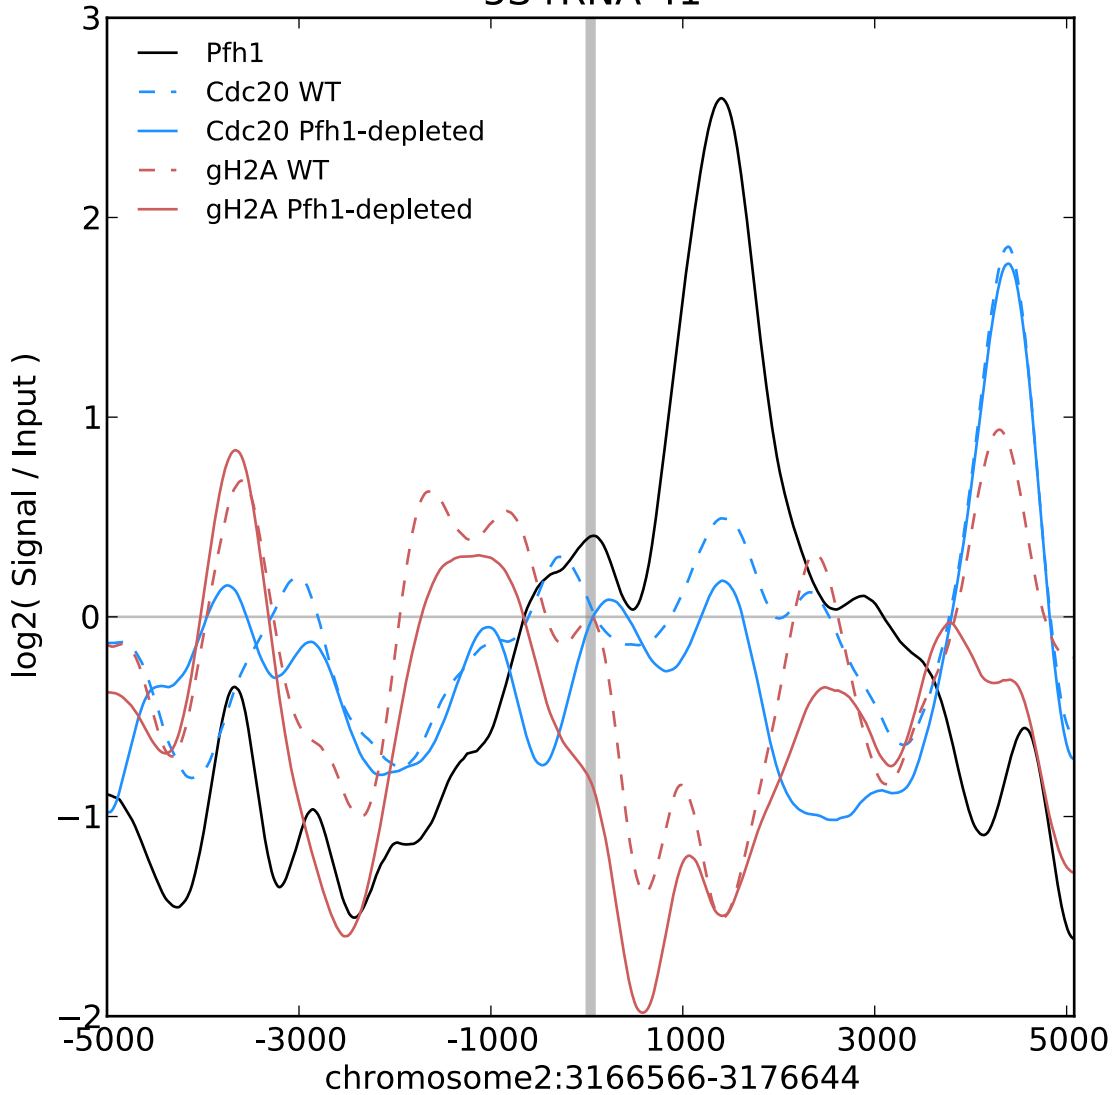

Supplement: pgen.1006238.s004.pdf [file pgen.1006238.s004.pdf]
