# Supplementary material for: Pfh1 Is an Accessory Replicative Helicase that Interacts with the Replisome to Facilitate Fork Progression and Preserve Genome Integrity
Source: PubMed Central journal article supplement (PMC5017727; doi:10.1371/journal.pgen.1006238), 2016-09-09

Fig S5

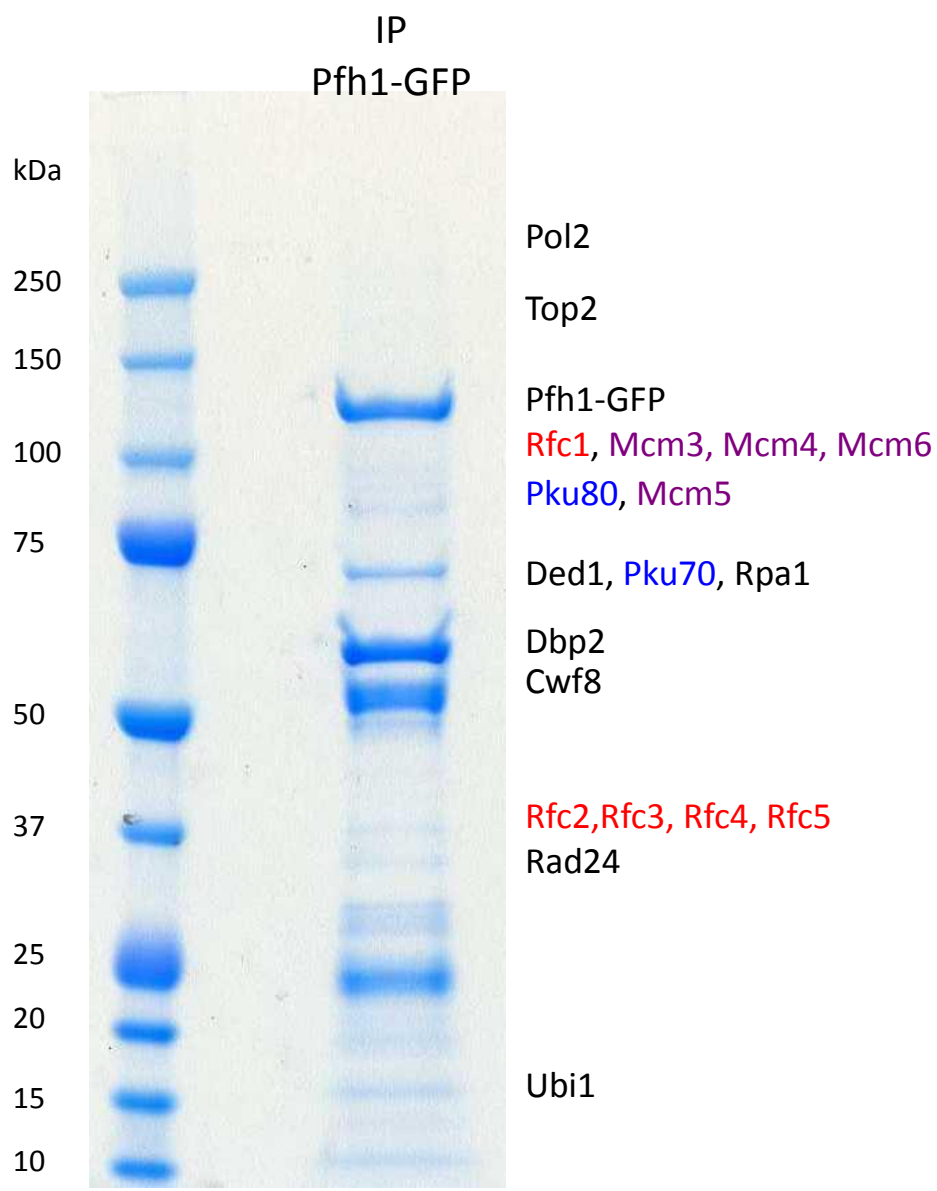

Supplement: pgen.1006238.s005.pdf [file pgen.1006238.s005.pdf]
